# Supplementary material for: m6A regulator-mediated methylation modification patterns and tumor microenvironment infiltration characterization in gastric cancer
Source: Mol Cancer. 2020 Mar 12;19:53. doi: 10.1186/s12943-020-01170-0 (PMC7066851; doi:10.1186/s12943-020-01170-0)
Supplement: Supplementary file 2 — Additional file 2:Table S1. Basic information of datasets included in this study for identifying distinct m6A methylation modification patterns. Table S2. The gene sets used in this work for marking each TME infiltration cell type. Table S3. Spearman correlation analysis of the 21 m6A modification regulators. Table S4. Estimating relative abundance of tumor microenvironment cells in 1059 gastric cancer patients by the Single-Sample Gene-Set. Table S5. The activation states of biological pathways in distinct m6A modification patterns by GSVA enrichment analysis. Table S6. The changes of m6Aclusters, ACRG molecular subtypes, gene clusters and m6Ascore. Table S7. Prognostic analysis of 718 m6A phenotype-related genes using a univariate Cox regression model. Table S8. Functional annotation for m6A phenotype -related genes (Gene Ontology-Biological process). Table S9. Spearman correlation between m6Ascore and other known signatures within the gastric cancer. [file 12943_2020_1170_MOESM2_ESM.xlsx]

## Sheet: S1
Table-S1: Basic information of datasets included in this study for identifying distinct m6A methylation modification patterns
Accession number /Source	Platform	Number of patients	Stage	Sex	Histology	Survival data
GEO: GSE15459	Affymetrix Human Genome U133 Plus 2.0 Array	200	I/II:60 III/IV:132	Female:67 Male:125	Diffuse:75;Intestinal:99;Mixed:18	OS
GEO: GSE34942	Affymetrix Human Genome U133 Plus 2.0 Array	56	I/II:22 III/IV:31	Female:20 Male:36	Diffuse:11;Intestinal:39;Mixed:4	OS
GEO: GSE57303	Affymetrix Human Genome U133 Plus 2.0 Array	70	I/II:12 III/IV:58	Female:18 Male:52	Diffuse:35;Intestinal:20;Mixed:15	OS
GEO: GSE62254(ACRG)	Affymetrix Human Genome U133 Plus 2.0 Array	300	I/II:127 III/IV:173	Female:101 Male:199	Diffuse:135;Intestinal:146;Mixed:19	OS/RFS
GEO: GSE84437	Illumina HumanHT-12 V3.0 expression beadchip	433	NA	Female:137 Male:296	NA	OS
GEO: GSE26253	Illumina HumanRef-8 WG-DASL v3.0	432	I/II:235 III/IV:197	NA	NA	RFS
GEO: GSE66229	Affymetrix Human Genome U133 Plus 2.0 Array	400	NA	NA	NA	NA
TCGA: STAD	Illumina RNAseq	347	I/II:154 III/IV:180	Female:123 Male:224	Diffuse:61;Intestinal:157;Mixed:117	OS
The GSE66229 is composed of the SubSeries of GSE62254 and GSE66222

## Sheet: S2
Table-S2: The gene sets used in this work for marking each TME infiltration cell type
Metagene	Cell.type	Immunity
ADAM28	Activated.B.cell	Adaptive
CD180	Activated.B.cell	Adaptive
CD79B	Activated.B.cell	Adaptive
BLK	Activated.B.cell	Adaptive
CD19	Activated.B.cell	Adaptive
MS4A1	Activated.B.cell	Adaptive
TNFRSF17	Activated.B.cell	Adaptive
IGHM	Activated.B.cell	Adaptive
GNG7	Activated.B.cell	Adaptive
MICAL3	Activated.B.cell	Adaptive
SPIB	Activated.B.cell	Adaptive
HLA-DOB	Activated.B.cell	Adaptive
IGKC	Activated.B.cell	Adaptive
PNOC	Activated.B.cell	Adaptive
FCRL2	Activated.B.cell	Adaptive
BACH2	Activated.B.cell	Adaptive
CR2	Activated.B.cell	Adaptive
TCL1A	Activated.B.cell	Adaptive
AKNA	Activated.B.cell	Adaptive
ARHGAP25	Activated.B.cell	Adaptive
CCL21	Activated.B.cell	Adaptive
CD27	Activated.B.cell	Adaptive
CD38	Activated.B.cell	Adaptive
CLEC17A	Activated.B.cell	Adaptive
CLEC9A	Activated.B.cell	Adaptive
CLECL1	Activated.B.cell	Adaptive
AIM2	Activated.CD4.T.cell	Adaptive
BIRC3	Activated.CD4.T.cell	Adaptive
BRIP1	Activated.CD4.T.cell	Adaptive
CCL20	Activated.CD4.T.cell	Adaptive
CCL4	Activated.CD4.T.cell	Adaptive
CCL5	Activated.CD4.T.cell	Adaptive
CCNB1	Activated.CD4.T.cell	Adaptive
CCR7	Activated.CD4.T.cell	Adaptive
DUSP2	Activated.CD4.T.cell	Adaptive
ESCO2	Activated.CD4.T.cell	Adaptive
ETS1	Activated.CD4.T.cell	Adaptive
EXO1	Activated.CD4.T.cell	Adaptive
EXOC6	Activated.CD4.T.cell	Adaptive
IARS	Activated.CD4.T.cell	Adaptive
ITK	Activated.CD4.T.cell	Adaptive
KIF11	Activated.CD4.T.cell	Adaptive
KNTC1	Activated.CD4.T.cell	Adaptive
NUF2	Activated.CD4.T.cell	Adaptive
PRC1	Activated.CD4.T.cell	Adaptive
PSAT1	Activated.CD4.T.cell	Adaptive
RGS1	Activated.CD4.T.cell	Adaptive
RTKN2	Activated.CD4.T.cell	Adaptive
SAMSN1	Activated.CD4.T.cell	Adaptive
SELL	Activated.CD4.T.cell	Adaptive
TRAT1	Activated.CD4.T.cell	Adaptive
ADRM1	Activated.CD8.T.cell	Adaptive
AHSA1	Activated.CD8.T.cell	Adaptive
C1GALT1C1	Activated.CD8.T.cell	Adaptive
CCT6B	Activated.CD8.T.cell	Adaptive
CD37	Activated.CD8.T.cell	Adaptive
CD3D	Activated.CD8.T.cell	Adaptive
CD3E	Activated.CD8.T.cell	Adaptive
CD3G	Activated.CD8.T.cell	Adaptive
CD69	Activated.CD8.T.cell	Adaptive
CD8A	Activated.CD8.T.cell	Adaptive
CETN3	Activated.CD8.T.cell	Adaptive
CSE1L	Activated.CD8.T.cell	Adaptive
GEMIN6	Activated.CD8.T.cell	Adaptive
GNLY	Activated.CD8.T.cell	Adaptive
GPT2	Activated.CD8.T.cell	Adaptive
GZMA	Activated.CD8.T.cell	Adaptive
GZMH	Activated.CD8.T.cell	Adaptive
GZMK	Activated.CD8.T.cell	Adaptive
IL2RB	Activated.CD8.T.cell	Adaptive
LCK	Activated.CD8.T.cell	Adaptive
MPZL1	Activated.CD8.T.cell	Adaptive
NKG7	Activated.CD8.T.cell	Adaptive
PIK3IP1	Activated.CD8.T.cell	Adaptive
PTRH2	Activated.CD8.T.cell	Adaptive
TIMM13	Activated.CD8.T.cell	Adaptive
ZAP70	Activated.CD8.T.cell	Adaptive
ACP5	Gamma.delta.T.cell	Adaptive
AQP9	Gamma.delta.T.cell	Adaptive
BTN3A2	Gamma.delta.T.cell	Adaptive
C1orf54	Gamma.delta.T.cell	Adaptive
CARD8	Gamma.delta.T.cell	Adaptive
CCL18	Gamma.delta.T.cell	Adaptive
CD209	Gamma.delta.T.cell	Adaptive
CD33	Gamma.delta.T.cell	Adaptive
CD36	Gamma.delta.T.cell	Adaptive
CDK5	Gamma.delta.T.cell	Adaptive
IL10RB	Gamma.delta.T.cell	Adaptive
KLRF1	Gamma.delta.T.cell	Adaptive
LGALS1	Gamma.delta.T.cell	Adaptive
MAPK7	Gamma.delta.T.cell	Adaptive
KLHL7	Gamma.delta.T.cell	Adaptive
KRT80	Gamma.delta.T.cell	Adaptive
LAMC1	Gamma.delta.T.cell	Adaptive
LCORL	Gamma.delta.T.cell	Adaptive
LMNB1	Gamma.delta.T.cell	Adaptive
MEIS3P1	Gamma.delta.T.cell	Adaptive
MPL	Gamma.delta.T.cell	Adaptive
FABP1	Gamma.delta.T.cell	Adaptive
FABP5	Gamma.delta.T.cell	Adaptive
FADD	Gamma.delta.T.cell	Adaptive
MFAP3L	Gamma.delta.T.cell	Adaptive
MINPP1	Gamma.delta.T.cell	Adaptive
RPS24	Gamma.delta.T.cell	Adaptive
RPS7	Gamma.delta.T.cell	Adaptive
RPS9	Gamma.delta.T.cell	Adaptive
DBNL	Gamma.delta.T.cell	Adaptive
CCL13	Gamma.delta.T.cell	Adaptive
CD22	Immature..B.cell	Adaptive
CYBB	Immature..B.cell	Adaptive
FAM129C	Immature..B.cell	Adaptive
FCRL1	Immature..B.cell	Adaptive
FCRL3	Immature..B.cell	Adaptive
FCRL5	Immature..B.cell	Adaptive
FCRLA	Immature..B.cell	Adaptive
HDAC9	Immature..B.cell	Adaptive
HLA-DQA1	Immature..B.cell	Adaptive
HVCN1	Immature..B.cell	Adaptive
KIAA0226	Immature..B.cell	Adaptive
NCF1	Immature..B.cell	Adaptive
NCF1B	Immature..B.cell	Adaptive
P2RY10	Immature..B.cell	Adaptive
SP100	Immature..B.cell	Adaptive
TXNIP	Immature..B.cell	Adaptive
STAP1	Immature..B.cell	Adaptive
TAGAP	Immature..B.cell	Adaptive
ZCCHC2	Immature..B.cell	Adaptive
CCL3L1	Regulatory.T.cell	Adaptive
CD72	Regulatory.T.cell	Adaptive
CLEC5A	Regulatory.T.cell	Adaptive
FOXP3	Regulatory.T.cell	Adaptive
ITGA4	Regulatory.T.cell	Adaptive
L1CAM	Regulatory.T.cell	Adaptive
LIPA	Regulatory.T.cell	Adaptive
LRP1	Regulatory.T.cell	Adaptive
LRRC42	Regulatory.T.cell	Adaptive
MARCO	Regulatory.T.cell	Adaptive
MMP12	Regulatory.T.cell	Adaptive
MNDA	Regulatory.T.cell	Adaptive
MRC1	Regulatory.T.cell	Adaptive
MS4A6A	Regulatory.T.cell	Adaptive
PELO	Regulatory.T.cell	Adaptive
PLEK	Regulatory.T.cell	Adaptive
PRSS23	Regulatory.T.cell	Adaptive
PTGIR	Regulatory.T.cell	Adaptive
ST8SIA4	Regulatory.T.cell	Adaptive
STAB1	Regulatory.T.cell	Adaptive
B3GAT1	T.follicular.helper.cell	Adaptive
CDK5R1	T.follicular.helper.cell	Adaptive
PDCD1	T.follicular.helper.cell	Adaptive
BCL6	T.follicular.helper.cell	Adaptive
CD200	T.follicular.helper.cell	Adaptive
CD83	T.follicular.helper.cell	Adaptive
CD84	T.follicular.helper.cell	Adaptive
FGF2	T.follicular.helper.cell	Adaptive
GPR18	T.follicular.helper.cell	Adaptive
CEBPA	T.follicular.helper.cell	Adaptive
CECR1	T.follicular.helper.cell	Adaptive
CLEC10A	T.follicular.helper.cell	Adaptive
CLEC4A	T.follicular.helper.cell	Adaptive
CSF1R	T.follicular.helper.cell	Adaptive
CTSS	T.follicular.helper.cell	Adaptive
DMN	T.follicular.helper.cell	Adaptive
DPP4	T.follicular.helper.cell	Adaptive
LRRC32	T.follicular.helper.cell	Adaptive
MC5R	T.follicular.helper.cell	Adaptive
MICA	T.follicular.helper.cell	Adaptive
NCAM1	T.follicular.helper.cell	Adaptive
NCR2	T.follicular.helper.cell	Adaptive
NRP1	T.follicular.helper.cell	Adaptive
PDCD1LG2	T.follicular.helper.cell	Adaptive
PDCD6	T.follicular.helper.cell	Adaptive
PRDX1	T.follicular.helper.cell	Adaptive
RAE1	T.follicular.helper.cell	Adaptive
RAET1E	T.follicular.helper.cell	Adaptive
SIGLEC7	T.follicular.helper.cell	Adaptive
SIGLEC9	T.follicular.helper.cell	Adaptive
TYRO3	T.follicular.helper.cell	Adaptive
CHST12	T.follicular.helper.cell	Adaptive
CLIC3	T.follicular.helper.cell	Adaptive
IVNS1ABP	T.follicular.helper.cell	Adaptive
KIR2DL2	T.follicular.helper.cell	Adaptive
LGMN	T.follicular.helper.cell	Adaptive
CD70	Type.1.T.helper.cell	Adaptive
TBX21	Type.1.T.helper.cell	Adaptive
ADAM8	Type.1.T.helper.cell	Adaptive
AHCYL2	Type.1.T.helper.cell	Adaptive
ALCAM	Type.1.T.helper.cell	Adaptive
B3GALNT1	Type.1.T.helper.cell	Adaptive
BBS12	Type.1.T.helper.cell	Adaptive
BST1	Type.1.T.helper.cell	Adaptive
CD151	Type.1.T.helper.cell	Adaptive
CD47	Type.1.T.helper.cell	Adaptive
CD48	Type.1.T.helper.cell	Adaptive
CD52	Type.1.T.helper.cell	Adaptive
CD53	Type.1.T.helper.cell	Adaptive
CD59	Type.1.T.helper.cell	Adaptive
CD6	Type.1.T.helper.cell	Adaptive
CD68	Type.1.T.helper.cell	Adaptive
CD7	Type.1.T.helper.cell	Adaptive
CD96	Type.1.T.helper.cell	Adaptive
CFHR3	Type.1.T.helper.cell	Adaptive
CHRM3	Type.1.T.helper.cell	Adaptive
CLEC7A	Type.1.T.helper.cell	Adaptive
COL23A1	Type.1.T.helper.cell	Adaptive
COL4A4	Type.1.T.helper.cell	Adaptive
COL5A3	Type.1.T.helper.cell	Adaptive
DAB1	Type.1.T.helper.cell	Adaptive
DLEU7	Type.1.T.helper.cell	Adaptive
DOC2B	Type.1.T.helper.cell	Adaptive
EMP1	Type.1.T.helper.cell	Adaptive
F12	Type.1.T.helper.cell	Adaptive
FURIN	Type.1.T.helper.cell	Adaptive
GAB3	Type.1.T.helper.cell	Adaptive
GATM	Type.1.T.helper.cell	Adaptive
GFPT2	Type.1.T.helper.cell	Adaptive
GPR25	Type.1.T.helper.cell	Adaptive
GREM2	Type.1.T.helper.cell	Adaptive
HAVCR1	Type.1.T.helper.cell	Adaptive
HSD11B1	Type.1.T.helper.cell	Adaptive
HUNK	Type.1.T.helper.cell	Adaptive
IGF2	Type.1.T.helper.cell	Adaptive
RCSD1	Type.1.T.helper.cell	Adaptive
RYR1	Type.1.T.helper.cell	Adaptive
SAV1	Type.1.T.helper.cell	Adaptive
SELE	Type.1.T.helper.cell	Adaptive
SELP	Type.1.T.helper.cell	Adaptive
SH3KBP1	Type.1.T.helper.cell	Adaptive
SIT1	Type.1.T.helper.cell	Adaptive
SLC35B3	Type.1.T.helper.cell	Adaptive
SIGLEC10	Type.1.T.helper.cell	Adaptive
SKAP1	Type.1.T.helper.cell	Adaptive
THUMPD2	Type.1.T.helper.cell	Adaptive
TIGIT	Type.1.T.helper.cell	Adaptive
ZEB2	Type.1.T.helper.cell	Adaptive
ENC1	Type.1.T.helper.cell	Adaptive
FAM134B	Type.1.T.helper.cell	Adaptive
FBXO30	Type.1.T.helper.cell	Adaptive
FCGR2C	Type.1.T.helper.cell	Adaptive
STAC	Type.1.T.helper.cell	Adaptive
LTC4S	Type.1.T.helper.cell	Adaptive
MAN1B1	Type.1.T.helper.cell	Adaptive
MDH1	Type.1.T.helper.cell	Adaptive
MMD	Type.1.T.helper.cell	Adaptive
RGS16	Type.1.T.helper.cell	Adaptive
IL12A	Type.1.T.helper.cell	Adaptive
P2RX5	Type.1.T.helper.cell	Adaptive
CD97	Type.1.T.helper.cell	Adaptive
ITGB4	Type.1.T.helper.cell	Adaptive
ICAM3	Type.1.T.helper.cell	Adaptive
METRNL	Type.1.T.helper.cell	Adaptive
TNFRSF1A	Type.1.T.helper.cell	Adaptive
IRF1	Type.1.T.helper.cell	Adaptive
HTR2B	Type.1.T.helper.cell	Adaptive
CALD1	Type.1.T.helper.cell	Adaptive
MOCOS	Type.1.T.helper.cell	Adaptive
TRAF3IP2	Type.1.T.helper.cell	Adaptive
TLR8	Type.1.T.helper.cell	Adaptive
TRAF1	Type.1.T.helper.cell	Adaptive
DUSP14	Type.1.T.helper.cell	Adaptive
IL17A	Type.17.T.helper.cell	Adaptive
IL17RA	Type.17.T.helper.cell	Adaptive
C2CD4A	Type.17.T.helper.cell	Adaptive
C2CD4B	Type.17.T.helper.cell	Adaptive
CA2	Type.17.T.helper.cell	Adaptive
CCDC65	Type.17.T.helper.cell	Adaptive
CEACAM3	Type.17.T.helper.cell	Adaptive
IL17C	Type.17.T.helper.cell	Adaptive
IL17F	Type.17.T.helper.cell	Adaptive
IL17RC	Type.17.T.helper.cell	Adaptive
IL17RE	Type.17.T.helper.cell	Adaptive
IL23A	Type.17.T.helper.cell	Adaptive
ILDR1	Type.17.T.helper.cell	Adaptive
LONRF3	Type.17.T.helper.cell	Adaptive
SH2D6	Type.17.T.helper.cell	Adaptive
TNIP2	Type.17.T.helper.cell	Adaptive
ABCA1	Type.17.T.helper.cell	Adaptive
ABCB1	Type.17.T.helper.cell	Adaptive
ADAMTS12	Type.17.T.helper.cell	Adaptive
ANK1	Type.17.T.helper.cell	Adaptive
ANKRD22	Type.17.T.helper.cell	Adaptive
B3GALT2	Type.17.T.helper.cell	Adaptive
CAMTA1	Type.17.T.helper.cell	Adaptive
CCR9	Type.17.T.helper.cell	Adaptive
CD40	Type.17.T.helper.cell	Adaptive
GPR44	Type.17.T.helper.cell	Adaptive
IFT80	Type.17.T.helper.cell	Adaptive
ASB2	Type.2.T.helper.cell	Adaptive
CSRP2	Type.2.T.helper.cell	Adaptive
DAPK1	Type.2.T.helper.cell	Adaptive
DLC1	Type.2.T.helper.cell	Adaptive
DNAJC12	Type.2.T.helper.cell	Adaptive
DUSP6	Type.2.T.helper.cell	Adaptive
GNAI1	Type.2.T.helper.cell	Adaptive
LAMP3	Type.2.T.helper.cell	Adaptive
NRP2	Type.2.T.helper.cell	Adaptive
OSBPL1A	Type.2.T.helper.cell	Adaptive
PDE4B	Type.2.T.helper.cell	Adaptive
PHLDA1	Type.2.T.helper.cell	Adaptive
PLA2G4A	Type.2.T.helper.cell	Adaptive
RAB27B	Type.2.T.helper.cell	Adaptive
RBMS3	Type.2.T.helper.cell	Adaptive
RNF125	Type.2.T.helper.cell	Adaptive
TMPRSS3	Type.2.T.helper.cell	Adaptive
GATA3	Type.2.T.helper.cell	Adaptive
BIRC5	Type.2.T.helper.cell	Adaptive
CDC25C	Type.2.T.helper.cell	Adaptive
CDC7	Type.2.T.helper.cell	Adaptive
CENPF	Type.2.T.helper.cell	Adaptive
CXCR6	Type.2.T.helper.cell	Adaptive
DHFR	Type.2.T.helper.cell	Adaptive
EVI5	Type.2.T.helper.cell	Adaptive
GSTA4	Type.2.T.helper.cell	Adaptive
HELLS	Type.2.T.helper.cell	Adaptive
IL26	Type.2.T.helper.cell	Adaptive
LAIR2	Type.2.T.helper.cell	Adaptive
ABCD1	Activated.dendritic.cell	Innate
C1QC	Activated.dendritic.cell	Innate
CAPG	Activated.dendritic.cell	Innate
CCL3L3	Activated.dendritic.cell	Innate
CD207	Activated.dendritic.cell	Innate
CD302	Activated.dendritic.cell	Innate
ATP5B	Activated.dendritic.cell	Innate
ATP5L	Activated.dendritic.cell	Innate
ATP6V1A	Activated.dendritic.cell	Innate
BCL2L1	Activated.dendritic.cell	Innate
C1QB	Activated.dendritic.cell	Innate
SNURF	Activated.dendritic.cell	Innate
SPCS3	Activated.dendritic.cell	Innate
CCNA1	Activated.dendritic.cell	Innate
CEACAM8	Activated.dendritic.cell	Innate
NOS2	Activated.dendritic.cell	Innate
SRA1	Activated.dendritic.cell	Innate
TNFRSF6B	Activated.dendritic.cell	Innate
TREM1	Activated.dendritic.cell	Innate
TREML1	Activated.dendritic.cell	Innate
RHOA	Activated.dendritic.cell	Innate
SLC25A37	Activated.dendritic.cell	Innate
TNFSF14	Activated.dendritic.cell	Innate
TREML4	Activated.dendritic.cell	Innate
VNN2	Activated.dendritic.cell	Innate
XPO6	Activated.dendritic.cell	Innate
CLEC4C	Activated.dendritic.cell	Innate
TNFAIP2	Activated.dendritic.cell	Innate
UBD	Activated.dendritic.cell	Innate
ACTR3	Activated.dendritic.cell	Innate
RAB1A	Activated.dendritic.cell	Innate
SLA	Activated.dendritic.cell	Innate
HLA-DQA2	Activated.dendritic.cell	Innate
SIGLEC5	Activated.dendritic.cell	Innate
SLAMF9	Activated.dendritic.cell	Innate
ABAT	CD56bright.natural.killer.cell	Innate
C11orf75	CD56bright.natural.killer.cell	Innate
C5orf15	CD56bright.natural.killer.cell	Innate
CDHR1	CD56bright.natural.killer.cell	Innate
DCAF12	CD56bright.natural.killer.cell	Innate
DYNLL1	CD56bright.natural.killer.cell	Innate
GPR137B	CD56bright.natural.killer.cell	Innate
HCP5	CD56bright.natural.killer.cell	Innate
HDGFRP2	CD56bright.natural.killer.cell	Innate
KRT86	CD56bright.natural.killer.cell	Innate
MLST8	CD56bright.natural.killer.cell	Innate
ELMOD3	CD56bright.natural.killer.cell	Innate
ENTPD5	CD56bright.natural.killer.cell	Innate
FAM119A	CD56bright.natural.killer.cell	Innate
FAM179A	CD56bright.natural.killer.cell	Innate
CLIC2	CD56bright.natural.killer.cell	Innate
COX7A2L	CD56bright.natural.killer.cell	Innate
CREB3L4	CD56bright.natural.killer.cell	Innate
CSF1	CD56bright.natural.killer.cell	Innate
CSNK2A2	CD56bright.natural.killer.cell	Innate
CSTA	CD56bright.natural.killer.cell	Innate
CSTB	CD56bright.natural.killer.cell	Innate
CTPS	CD56bright.natural.killer.cell	Innate
CTSD	CD56bright.natural.killer.cell	Innate
FST	CD56bright.natural.killer.cell	Innate
GATA2	CD56bright.natural.killer.cell	Innate
GMPR	CD56bright.natural.killer.cell	Innate
HDC	CD56bright.natural.killer.cell	Innate
HEY1	CD56bright.natural.killer.cell	Innate
HOXA1	CD56bright.natural.killer.cell	Innate
HS2ST1	CD56bright.natural.killer.cell	Innate
HS3ST1	CD56bright.natural.killer.cell	Innate
BCL11B	CD56bright.natural.killer.cell	Innate
CDH3	CD56bright.natural.killer.cell	Innate
MYL6B	CD56bright.natural.killer.cell	Innate
NAA16	CD56bright.natural.killer.cell	Innate
ClQA	CD56bright.natural.killer.cell	Innate
ClQB	CD56bright.natural.killer.cell	Innate
CYP27B1	CD56bright.natural.killer.cell	Innate
EIF3M	CD56bright.natural.killer.cell	Innate
CYP27A1	CD56dim.natural.killer.cell	Innate
DDX55	CD56dim.natural.killer.cell	Innate
DYRK2	CD56dim.natural.killer.cell	Innate
RPL37A	CD56dim.natural.killer.cell	Innate
NOTCH3	CD56dim.natural.killer.cell	Innate
AKR7A3	CD56dim.natural.killer.cell	Innate
GPRC5C	CD56dim.natural.killer.cell	Innate
GRIN1	CD56dim.natural.killer.cell	Innate
HLA-E	CD56dim.natural.killer.cell	Innate
PORCN	CD56dim.natural.killer.cell	Innate
PSMC4	CD56dim.natural.killer.cell	Innate
UPP1	CD56dim.natural.killer.cell	Innate
IL21R	CD56dim.natural.killer.cell	Innate
KIR2DS1	CD56dim.natural.killer.cell	Innate
KIR2DS2	CD56dim.natural.killer.cell	Innate
KIR2DS5	CD56dim.natural.killer.cell	Innate
GIPR	Eosinophil	Innate
KRT18P50	Eosinophil	Innate
LRMP	Eosinophil	Innate
FOSB	Eosinophil	Innate
RRP12	Eosinophil	Innate
GPR183	Eosinophil	Innate
NR4A3	Eosinophil	Innate
ST3GAL6	Eosinophil	Innate
DEPDC5	Eosinophil	Innate
PDE6C	Eosinophil	Innate
PKD2L2	Eosinophil	Innate
GPR65	Eosinophil	Innate
IL5RA	Eosinophil	Innate
P2RY14	Eosinophil	Innate
DACH1	Eosinophil	Innate
DAPK2	Eosinophil	Innate
EMR3	Eosinophil	Innate
ACADM	Immature.dendritic.cell	Innate
AHCYL1	Immature.dendritic.cell	Innate
ALDH1A2	Immature.dendritic.cell	Innate
ALDH3A2	Immature.dendritic.cell	Innate
ALDH9A1	Immature.dendritic.cell	Innate
ALOX15	Immature.dendritic.cell	Innate
AMT	Immature.dendritic.cell	Innate
ARL1	Immature.dendritic.cell	Innate
ATIC	Immature.dendritic.cell	Innate
ATP5A1	Immature.dendritic.cell	Innate
CAPZA1	Immature.dendritic.cell	Innate
LILRA5	Immature.dendritic.cell	Innate
RDX	Immature.dendritic.cell	Innate
RRAGD	Immature.dendritic.cell	Innate
TACSTD2	Immature.dendritic.cell	Innate
INPP5F	Immature.dendritic.cell	Innate
RAB38	Immature.dendritic.cell	Innate
PLAU	Immature.dendritic.cell	Innate
CSF3R	Immature.dendritic.cell	Innate
SLC18A2	Immature.dendritic.cell	Innate
AMPD2	Immature.dendritic.cell	Innate
CLTB	Immature.dendritic.cell	Innate
C1orf162	Immature.dendritic.cell	Innate
AIF1	Macrophage	Innate
CCL1	Macrophage	Innate
CCL14	Macrophage	Innate
CCL23	Macrophage	Innate
CCL26	Macrophage	Innate
CD300LB	Macrophage	Innate
CNR1	Macrophage	Innate
CNR2	Macrophage	Innate
EIF1	Macrophage	Innate
EIF4A1	Macrophage	Innate
FPR1	Macrophage	Innate
FPR2	Macrophage	Innate
FRAT2	Macrophage	Innate
GPR27	Macrophage	Innate
GPR77	Macrophage	Innate
RNASE2	Macrophage	Innate
MS4A2	Macrophage	Innate
BASP1	Macrophage	Innate
IGSF6	Macrophage	Innate
HK3	Macrophage	Innate
VNN1	Macrophage	Innate
FES	Macrophage	Innate
NPL	Macrophage	Innate
FZD2	Macrophage	Innate
FAM198B	Macrophage	Innate
HNMT	Macrophage	Innate
SLC15A3	Macrophage	Innate
CD4	Macrophage	Innate
TXNDC3	Macrophage	Innate
FRMD4A	Macrophage	Innate
CRYBB1	Macrophage	Innate
HRH1	Macrophage	Innate
WNT5B	Macrophage	Innate
ADAMTS3	Mast.cell	Innate
CPA3	Mast.cell	Innate
CMA1	Mast.cell	Innate
CTSG	Mast.cell	Innate
ARHGAP15	Mast.cell	Innate
CPM	Mast.cell	Innate
FCN1	Mast.cell	Innate
FTL	Mast.cell	Innate
HSPA6	Mast.cell	Innate
ITGA9	Mast.cell	Innate
RNASE3	Mast.cell	Innate
S100A4	Mast.cell	Innate
SIGLEC8	Mast.cell	Innate
SLC6A4	Mast.cell	Innate
PTGS2	Mast.cell	Innate
EGR3	Mast.cell	Innate
PILRA	Mast.cell	Innate
CCR2	MDSC	Innate
CD14	MDSC	Innate
CD2	MDSC	Innate
CD86	MDSC	Innate
CXCR4	MDSC	Innate
FCGR2A	MDSC	Innate
FCGR2B	MDSC	Innate
FCGR3A	MDSC	Innate
FERMT3	MDSC	Innate
GPSM3	MDSC	Innate
IL18BP	MDSC	Innate
IL4R	MDSC	Innate
ITGAL	MDSC	Innate
ITGAM	MDSC	Innate
PARVG	MDSC	Innate
PSAP	MDSC	Innate
PTGER2	MDSC	Innate
PTGES2	MDSC	Innate
S100A8	MDSC	Innate
S100A9	MDSC	Innate
ASGR2	Monocyte	Innate
CFP	Monocyte	Innate
ASGR1	Monocyte	Innate
CD1D	Monocyte	Innate
UPK3A	Monocyte	Innate
ACTG1	Monocyte	Innate
ANXA5	Monocyte	Innate
ATP6V1B2	Monocyte	Innate
CFL1	Monocyte	Innate
DAZAP2	Monocyte	Innate
CTBS	Monocyte	Innate
EMR4P	Monocyte	Innate
HIVEP2	Monocyte	Innate
MARCKSL1	Monocyte	Innate
MBP	Monocyte	Innate
MMP15	Monocyte	Innate
PNPLA6	Monocyte	Innate
TMBIM6	Monocyte	Innate
PQBP1	Monocyte	Innate
TEX264	Monocyte	Innate
IKZF1	Monocyte	Innate
AKT3	Natural.killer.cell	Innate
AXL	Natural.killer.cell	Innate
BST2	Natural.killer.cell	Innate
CDH2	Natural.killer.cell	Innate
CRTAM	Natural.killer.cell	Innate
CSF2RA	Natural.killer.cell	Innate
CTSZ	Natural.killer.cell	Innate
CXCL1	Natural.killer.cell	Innate
CYTH1	Natural.killer.cell	Innate
DAXX	Natural.killer.cell	Innate
DGKH	Natural.killer.cell	Innate
DLL4	Natural.killer.cell	Innate
DPYD	Natural.killer.cell	Innate
ERBB3	Natural.killer.cell	Innate
F11R	Natural.killer.cell	Innate
FAM27A	Natural.killer.cell	Innate
FAM49A	Natural.killer.cell	Innate
FASLG	Natural.killer.cell	Innate
FCGR1A	Natural.killer.cell	Innate
FN1	Natural.killer.cell	Innate
FSTL1	Natural.killer.cell	Innate
FUCA1	Natural.killer.cell	Innate
GBP3	Natural.killer.cell	Innate
GLS2	Natural.killer.cell	Innate
GRB2	Natural.killer.cell	Innate
LST1	Natural.killer.cell	Innate
BCL2	Natural.killer.cell	Innate
CDC5L	Natural.killer.cell	Innate
FGF18	Natural.killer.cell	Innate
FUT5	Natural.killer.cell	Innate
FZR1	Natural.killer.cell	Innate
GAGE2	Natural.killer.cell	Innate
IGFBP5	Natural.killer.cell	Innate
KANK2	Natural.killer.cell	Innate
LDB3	Natural.killer.cell	Innate
BTN2A2	Natural.killer.T.cell	Innate
CD101	Natural.killer.T.cell	Innate
CD109	Natural.killer.T.cell	Innate
CNPY3	Natural.killer.T.cell	Innate
CNPY4	Natural.killer.T.cell	Innate
CREB1	Natural.killer.T.cell	Innate
CRTC2	Natural.killer.T.cell	Innate
CRTC3	Natural.killer.T.cell	Innate
CSF2	Natural.killer.T.cell	Innate
KLRC1	Natural.killer.T.cell	Innate
FUT4	Natural.killer.T.cell	Innate
ICAM2	Natural.killer.T.cell	Innate
IL32	Natural.killer.T.cell	Innate
LAMP2	Natural.killer.T.cell	Innate
LILRB5	Natural.killer.T.cell	Innate
KLRG1	Natural.killer.T.cell	Innate
HSPA4	Natural.killer.T.cell	Innate
HSPB6	Natural.killer.T.cell	Innate
ISM2	Natural.killer.T.cell	Innate
ITIH2	Natural.killer.T.cell	Innate
KDM4C	Natural.killer.T.cell	Innate
KIR2DS4	Natural.killer.T.cell	Innate
KIRREL3	Natural.killer.T.cell	Innate
SDCBP	Natural.killer.T.cell	Innate
NFATC2IP	Natural.killer.T.cell	Innate
MICB	Natural.killer.T.cell	Innate
KIR2DL1	Natural.killer.T.cell	Innate
KIR2DL3	Natural.killer.T.cell	Innate
KIR3DL1	Natural.killer.T.cell	Innate
KIR3DL2	Natural.killer.T.cell	Innate
NCR1	Natural.killer.T.cell	Innate
FOSL1	Natural.killer.T.cell	Innate
TSLP	Natural.killer.T.cell	Innate
SLC7A7	Natural.killer.T.cell	Innate
SPP1	Natural.killer.T.cell	Innate
TREM2	Natural.killer.T.cell	Innate
UBASH3A	Natural.killer.T.cell	Innate
YBX2	Natural.killer.T.cell	Innate
CCDC88A	Natural.killer.T.cell	Innate
CLEC1A	Natural.killer.T.cell	Innate
THBD	Natural.killer.T.cell	Innate
PDPN	Natural.killer.T.cell	Innate
VCAM1	Natural.killer.T.cell	Innate
EMR1	Natural.killer.T.cell	Innate
CREB5	Neutrophil	Innate
CDA	Neutrophil	Innate
CHST15	Neutrophil	Innate
S100A12	Neutrophil	Innate
APOBEC3A	Neutrophil	Innate
CASP5	Neutrophil	Innate
MMP25	Neutrophil	Innate
HAL	Neutrophil	Innate
C1orf183	Neutrophil	Innate
FFAR2	Neutrophil	Innate
MAK	Neutrophil	Innate
CXCR1	Neutrophil	Innate
STEAP4	Neutrophil	Innate
MGAM	Neutrophil	Innate
BTNL8	Neutrophil	Innate
CXCR2	Neutrophil	Innate
TNFRSF10C	Neutrophil	Innate
VNN3	Neutrophil	Innate
CBX6	Plasmacytoid.dendritic.cell	Innate
DAB2	Plasmacytoid.dendritic.cell	Innate
DDX17	Plasmacytoid.dendritic.cell	Innate
HIGD1A	Plasmacytoid.dendritic.cell	Innate
IDH3A	Plasmacytoid.dendritic.cell	Innate
IL3RA	Plasmacytoid.dendritic.cell	Innate
MAGED1	Plasmacytoid.dendritic.cell	Innate
NUCB2	Plasmacytoid.dendritic.cell	Innate
OFD1	Plasmacytoid.dendritic.cell	Innate
OGT	Plasmacytoid.dendritic.cell	Innate
PDIA4	Plasmacytoid.dendritic.cell	Innate
SERTAD2	Plasmacytoid.dendritic.cell	Innate
SIRPA	Plasmacytoid.dendritic.cell	Innate
TMED2	Plasmacytoid.dendritic.cell	Innate
ENG	Plasmacytoid.dendritic.cell	Innate
FCAR	Plasmacytoid.dendritic.cell	Innate
IGF1	Plasmacytoid.dendritic.cell	Innate
ITGA2B	Plasmacytoid.dendritic.cell	Innate
GABARAP	Plasmacytoid.dendritic.cell	Innate
GPX1	Plasmacytoid.dendritic.cell	Innate
KRT23	Plasmacytoid.dendritic.cell	Innate
PROK2	Plasmacytoid.dendritic.cell	Innate
RALB	Plasmacytoid.dendritic.cell	Innate
RETNLB	Plasmacytoid.dendritic.cell	Innate
RNF141	Plasmacytoid.dendritic.cell	Innate
SEC14L1	Plasmacytoid.dendritic.cell	Innate
SEPX1	Plasmacytoid.dendritic.cell	Innate
EMP3	Plasmacytoid.dendritic.cell	Innate
CD300LF	Plasmacytoid.dendritic.cell	Innate
ABTB1	Plasmacytoid.dendritic.cell	Innate
KLHL21	Plasmacytoid.dendritic.cell	Innate
PHRF1	Plasmacytoid.dendritic.cell	Innate

## Sheet: S3
Table-S3: Spearman correlation analysis of the 21 m6A modification regulators
From	To	P value（<0.00001）	Cor	Weight
RBM15	HNRNPC	0	0.389417	Inf
YTHDC2	HNRNPC	1.4026e-12	0.216738	11.8531
WTAP	HNRNPC	4.00848e-21	0.285741	20.397
METTL14	HNRNPC	1.45821e-07	0.16131	6.83618
CBLL1	HNRNPC	2.49647e-23	0.29878	22.6027
YTHDF3	HNRNPC	4.29462e-30	0.341364	29.3671
HNRNPA2B1	HNRNPC	4.70236e-11	0.201581	10.3277
FMR1	HNRNPC	1.23098e-10	0.197219	9.90975
KIAA1429	HNRNPC	1.1585e-11	0.207764	10.9361
METTL3	HNRNPC	6.86034e-11	0.199881	10.1637
FTO	HNRNPC	2.2004e-09	-0.183184	8.6575
ELAVL1	RBM15	2.46597e-11	0.204454	10.608
WTAP	RBM15	1.94942e-13	0.224788	12.7101
CBLL1	RBM15	5.12057e-08	0.167288	7.29068
YTHDF3	RBM15	8.56419e-09	0.176395	8.06731
FMR1	RBM15	7.81309e-07	0.15186	6.10718
KIAA1429	RBM15	1.35915e-07	0.161927	6.86673
YTHDC1	RBM15	3.13402e-06	0.143379	5.5039
METTL3	RBM15	1.2327e-06	0.149127	5.90914
FTO	RBM15	1.85416e-20	-0.280528	19.7319
YTHDF2	YTHDC2	1.07809e-08	0.175511	7.96735
ELAVL1	YTHDC2	1.35967e-06	0.148533	5.86657
METTL14	YTHDC2	2.45899e-18	0.264896	17.6092
YTHDF3	YTHDC2	2.19746e-13	0.223685	12.6581
IGF2BP1	YTHDC2	1.14934e-12	-0.217565	11.9396
YTHDC1	YTHDC2	4.00651e-06	0.141829	5.39723
METTL3	YTHDC2	5.79216e-07	0.153628	6.23716
YTHDF1	YTHDC2	5.19785e-16	-0.247297	15.2842
RBM15B	YTHDF2	8.00092e-06	0.137375	5.09686
WTAP	YTHDF2	7.57036e-24	0.301055	23.1209
LRPPRC	YTHDF2	3.6326e-12	0.212742	11.4398
CBLL1	YTHDF2	2.12339e-10	0.194704	9.67297
YTHDF3	YTHDF2	5.67577e-21	0.284167	20.246
HNRNPA2B1	YTHDF2	3.25414e-08	0.169721	7.48756
FMR1	YTHDF2	1.8972e-06	0.146498	5.72189
YTHDF1	YTHDF2	2.71551e-13	0.223457	12.5661
ALKBH5	YTHDF2	1.13229e-06	-0.149465	5.94604
FTO	YTHDF2	1.08182e-06	-0.149739	5.96585
LRPPRC	RBM15B	5.01747e-10	0.190668	9.29952
KIAA1429	RBM15B	2.50969e-06	0.144767	5.60038
METTL3	RBM15B	3.36184e-09	0.181418	8.47342
YTHDF1	RBM15B	4.53432e-10	0.191148	9.34349
LRPPRC	ELAVL1	3.08376e-06	0.143481	5.51092
METTL14	ELAVL1	7.5653e-06	0.137608	5.12117
CBLL1	ELAVL1	2.97205e-09	0.182032	8.52694
YTHDF3	ELAVL1	3.34062e-06	0.142827	5.47617
KIAA1429	ELAVL1	5.68769e-13	0.220458	12.2451
YTHDC1	ELAVL1	6.483e-08	0.166008	7.18822
ALKBH5	ELAVL1	1.54499e-21	0.288106	20.8111
CBLL1	WTAP	2.51304e-07	0.15846	6.5998
YTHDF3	WTAP	1.01108e-24	0.309216	23.9952
HNRNPA2B1	WTAP	2.29073e-12	0.214688	11.64
FMR1	WTAP	1.97384e-06	0.146254	5.70469
CBLL1	LRPPRC	5.34859e-09	0.179087	8.27176
HNRNPA2B1	LRPPRC	7.68802e-09	0.177245	8.11419
FMR1	LRPPRC	5.40541e-09	0.179034	8.26717
METTL3	LRPPRC	7.49382e-09	0.177375	8.1253
FTO	LRPPRC	5.87283e-10	-0.189545	9.23115
CBLL1	METTL14	8.57332e-06	0.136792	5.06685
IGF2BP1	METTL14	6.59891e-14	-0.228418	13.1805
KIAA1429	METTL14	5.18461e-06	0.140044	5.28528
YTHDC1	METTL14	5.59479e-11	0.200355	10.2522
METTL3	METTL14	3.49979e-10	0.191979	9.45596
YTHDF1	METTL14	8.17548e-11	-0.198652	10.0875
FTO	METTL14	3.07468e-06	0.143347	5.5122
ZC3H13	METTL14	3.47113e-06	0.142587	5.45953
YTHDF3	CBLL1	2.61877e-21	0.286516	20.5819
HNRNPA2B1	CBLL1	1.98805e-07	0.15979	6.70157
FMR1	CBLL1	7.1725e-11	0.19968	10.1443
FMR1	YTHDF3	6.74122e-06	0.138356	5.17126
KIAA1429	YTHDF3	2.8829e-29	0.336659	28.5402
FTO	YTHDF3	2.52019e-13	-0.223139	12.5986
YTHDC1	HNRNPA2B1	9.18508e-14	0.227779	13.0369
YTHDF1	HNRNPA2B1	1.18702e-08	0.175014	7.92554
ZC3H13	HNRNPA2B1	1.70464e-08	0.173133	7.76837
YTHDC1	IGF2BP1	4.99387e-07	-0.154497	6.30156
YTHDF1	IGF2BP1	2.95058e-16	0.249331	15.5301
ALKBH5	IGF2BP1	2.16906e-09	-0.183254	8.66373
FTO	IGF2BP1	3.86102e-19	-0.270938	18.4133
KIAA1429	FMR1	3.76512e-11	0.202575	10.4242
YTHDC1	FMR1	2.98222e-09	0.182015	8.52546
YTHDF1	FMR1	3.56872e-06	0.142561	5.44749
ZC3H13	FMR1	2.04133e-09	0.18389	8.69009
YTHDF1	KIAA1429	3.43588e-08	0.169431	7.46396
ALKBH5	KIAA1429	1.10865e-14	0.235248	13.9552
ZC3H13	KIAA1429	9.86192e-14	0.227499	13.006
METTL3	YTHDC1	1.22103e-11	0.207535	10.9133
ALKBH5	YTHDC1	2.10918e-07	0.159241	6.67589
FTO	YTHDC1	8.75431e-06	0.136656	5.05778
ZC3H13	METTL3	5.12162e-10	0.19057	9.29059
FTO	ALKBH5	1.50037e-20	0.281183	19.8238
ZC3H13	FTO	5.9659e-12	0.210111	11.2243

## Sheet: S4
Table-S4: Estimating relative abundance of tumor microenvironment cells in 1059 gastric cancer patients by the Single-Sample Gene-Set Enrichment Analysis (ssGSEA)
ID	Cluster	Activated.B.cell	Activated.CD4.T.cell	Activated.CD8.T.cell	Activated.dendritic.cell	CD56bright.natural.killer.cell	CD56dim.natural.killer.cell	Eosinophil	Gamma.delta.T.cell	Immature.B.cell	Immature.dendritic.cell	Macrophage	Mast.cell	MDSC	Monocyte	Natural.killer.cell	Natural.killer.T.cell	Neutrophil	Plasmacytoid.dendritic.cell	Regulatory.T.cell	T.follicular.helper.cell	Type.1.T.helper.cell	Type.17.T.helper.cell	Type.2.T.helper.cell
GSM1379261	m6Acluster.C	-0.180844	0.335926	0.312163	0.29705	0.219407	0.289017	-0.0729509	0.291228	-0.170521	0.355077	0.0474836	0.0673593	0.325647	0.309769	0.158882	0.0703873	-0.215114	0.240628	0.138472	0.11805	0.0612473	-0.063022	0.161816
GSM1379262	m6Acluster.A	0.21756	0.237718	0.272284	0.309528	0.186309	0.290457	-0.0958619	0.26206	0.0111499	0.395741	0.0089065	0.0398217	0.349132	0.346815	0.161712	-0.00288428	-0.174514	0.332545	0.120894	0.164607	0.100428	-0.0944026	0.11321
GSM1379263	m6Acluster.A	0.0699288	0.2964	0.341823	0.246177	0.238612	0.264418	0.0247448	0.290735	-0.0870989	0.294445	-0.00896896	0.119188	0.311432	0.364348	0.119047	0.00018455	-0.155369	0.244009	0.0713395	0.103968	0.105495	-0.0202235	0.151901
GSM1379264	m6Acluster.B	-0.0457267	0.429563	0.416083	0.324281	0.242541	0.204363	-0.0767217	0.27253	-0.0227968	0.384831	0.0357729	0.0137983	0.314082	0.3461	0.173237	0.0365927	-0.144531	0.289323	0.142511	0.1071	0.113944	-0.0326182	0.257612
GSM1379265	m6Acluster.B	0.155442	0.259349	0.38858	0.29605	0.268357	0.196287	-0.0370447	0.328115	0.0186979	0.343839	0.118679	0.174435	0.429351	0.373625	0.161552	0.0619534	-0.239627	0.34067	0.187545	0.177741	0.156284	-0.0715697	0.109729
GSM1379266	m6Acluster.B	-0.147374	0.332876	0.402937	0.378327	0.214637	0.260297	-0.0324319	0.314488	-0.120658	0.36162	0.0620825	0.0266471	0.367093	0.341378	0.174799	0.0688298	-0.129106	0.306978	0.199174	0.12362	0.127605	0.00512361	0.148105
GSM1379267	m6Acluster.A	-0.103595	0.157485	0.170986	0.275096	0.238704	0.29388	0.0247189	0.29002	-0.149101	0.377524	0.116147	0.16768	0.371473	0.340929	0.211435	0.112088	-0.282266	0.337856	0.252259	0.189732	0.123594	-0.0786696	0.114532
GSM1379268	m6Acluster.B	-0.100612	0.340458	0.250364	0.294535	0.255851	0.231217	-0.0395845	0.308739	-0.145088	0.350322	0.0687017	0.00785855	0.316659	0.320393	0.130528	0.0151204	-0.0547504	0.303547	0.16677	0.10375	0.0884633	-0.0884945	0.16164
GSM1379269	m6Acluster.A	-0.0315551	0.0910371	0.32424	0.272247	0.218693	0.246295	0.0593964	0.274572	-0.101216	0.366169	0.0811725	0.261356	0.395383	0.388609	0.181848	0.072881	-0.216304	0.334725	0.196633	0.210354	0.179238	-0.0753397	0.123463
GSM1379270	m6Acluster.C	-0.160432	0.269623	0.283924	0.206422	0.221487	0.281201	-0.0342156	0.28418	-0.268543	0.279606	-0.0444153	-0.027441	0.167998	0.343736	0.1078	-0.00919757	-0.183827	0.265418	0.0386409	0.126692	0.0140252	-0.112734	0.110747
GSM1379271	m6Acluster.B	-0.0223182	0.391502	0.476085	0.315931	0.220303	0.274058	-0.0453508	0.350206	-0.0897855	0.358253	0.0658884	0.0440701	0.389683	0.367846	0.152706	0.0560942	-0.242284	0.281221	0.22715	0.165743	0.139927	-0.0451193	0.15762
GSM1379272	m6Acluster.C	-0.054323	0.280815	0.311821	0.293601	0.204904	0.26632	0.0146166	0.294896	-0.165344	0.312497	0.0252083	0.0688403	0.283197	0.324539	0.140357	0.0465187	-0.26299	0.305181	0.153384	0.135101	0.0697523	-0.0828628	0.154906
GSM1379273	m6Acluster.C	-0.25791	0.202088	0.173417	0.23213	0.173495	0.226018	-0.177303	0.255935	-0.260593	0.313826	-0.0634082	-0.051896	0.133533	0.339287	0.102603	0.0131036	-0.297978	0.2178	-0.0479603	0.100846	0.0359761	-0.0743334	0.0630172
GSM1379274	m6Acluster.A	-0.254496	0.33856	0.329749	0.285182	0.223477	0.271927	-0.116922	0.234111	-0.240511	0.308244	0.000251151	-0.0124324	0.260825	0.32834	0.129334	0.0111985	-0.16011	0.304083	0.0352066	0.0953251	0.0573947	-0.0296796	0.174466
GSM1379275	m6Acluster.C	-0.223437	0.241361	0.123149	0.256666	0.190147	0.274688	-0.195226	0.343563	-0.191197	0.395138	0.000282093	-0.0130882	0.21768	0.307642	0.130478	0.0932761	-0.199033	0.295212	0.176216	0.14027	0.0545072	-0.0938823	0.0503224
GSM1379276	m6Acluster.C	0.116317	0.313709	0.29254	0.319079	0.26844	0.26671	-1.1e-05	0.327726	-0.0343692	0.365229	0.0775811	0.0981391	0.400953	0.339571	0.168749	0.045406	-0.0636281	0.285535	0.212408	0.148198	0.120917	-0.0656319	0.188307
GSM1379277	m6Acluster.C	-0.0237828	0.289425	0.334705	0.31506	0.21135	0.283219	-0.10502	0.2967	-0.0970743	0.326898	0.0437433	0.0725853	0.361995	0.291868	0.184147	0.0875076	-0.228916	0.286538	0.194429	0.152665	0.127353	-0.0897804	0.13198
GSM1379278	m6Acluster.C	-0.251327	0.184816	0.170946	0.275306	0.2332	0.275459	-0.196326	0.268037	-0.228874	0.304802	-0.0387932	-0.0271631	0.167675	0.321629	0.0954836	-0.014177	-0.129066	0.263955	0.00774568	0.0791623	0.0432176	-0.0807023	0.138036
GSM1379279	m6Acluster.C	-0.306322	0.266872	0.202387	0.302017	0.216607	0.247598	-0.0345388	0.364344	-0.207111	0.362261	0.0536594	0.0637686	0.269847	0.313291	0.176116	0.0410496	-0.062903	0.30764	0.201237	0.123483	0.0787566	-0.0773988	0.153685
GSM1379280	m6Acluster.A	-0.277652	0.196952	0.228816	0.245724	0.289804	0.23766	-0.0542846	0.280034	-0.255423	0.289434	-0.0231623	0.00503982	0.212143	0.316672	0.133586	0.0143412	-0.175119	0.319669	0.0568067	0.0612986	0.106815	-0.0216397	0.217208
GSM1379281	m6Acluster.A	-0.0649303	0.389847	0.406981	0.340787	0.233634	0.234313	-0.0762689	0.442769	-0.0771306	0.392786	0.161993	0.179835	0.47432	0.343291	0.194345	0.124228	-0.0969878	0.309455	0.375033	0.195739	0.174641	-0.0874537	0.203173
GSM1379282	m6Acluster.B	-0.296001	0.303966	0.339095	0.290051	0.176346	0.239583	-0.0736875	0.293772	-0.194687	0.318921	0.00473632	-0.0415859	0.244943	0.348135	0.159107	0.055053	-0.231908	0.24649	0.122546	0.0953761	0.10023	-0.0372441	0.133838
GSM1379283	m6Acluster.A	-0.202685	0.0878007	0.218385	0.323181	0.195096	0.210667	-0.0622592	0.339531	-0.135204	0.34118	0.14501	0.172307	0.429412	0.345112	0.22696	0.119975	-0.246809	0.342789	0.297407	0.194928	0.15613	-0.128597	0.167122
GSM1379284	m6Acluster.A	-0.299276	0.0960319	0.158696	0.264853	0.211491	0.275242	-0.146986	0.272301	-0.26632	0.339939	0.0117082	0.0211938	0.236777	0.321407	0.199933	0.059638	-0.166619	0.303257	0.0320941	0.113107	0.0677069	-0.130728	0.0922796
GSM1379285	m6Acluster.B	0.0788058	0.279532	0.338295	0.282315	0.230342	0.260403	-0.0295057	0.271162	-0.0826931	0.345142	0.013446	0.0614945	0.327732	0.356114	0.132394	0.0295658	-0.216808	0.29894	0.123576	0.116595	0.126284	-0.047005	0.152015
GSM1379286	m6Acluster.C	-0.298031	0.24672	0.243971	0.247009	0.247888	0.241976	-0.180036	0.291481	-0.269081	0.301976	-0.00561676	-0.0644895	0.252164	0.337865	0.13566	0.00576295	-0.224309	0.257824	0.080928	0.112927	0.0638542	-0.0918108	0.153519
GSM1379287	m6Acluster.C	-0.195324	0.227037	0.28748	0.286106	0.207343	0.279134	-0.0287723	0.318326	-0.172612	0.348652	0.0725276	0.0479219	0.34675	0.341436	0.174551	0.0328892	-0.175147	0.34336	0.198466	0.131773	0.130104	-0.0769038	0.0907308
GSM1379288	m6Acluster.B	-0.28707	0.255389	0.20881	0.251175	0.162627	0.27308	-0.086301	0.266764	-0.255094	0.295966	0.00030693	0.00424236	0.227678	0.33566	0.125617	0.0261362	-0.154185	0.272227	0.119564	0.0747599	0.07353	-0.0689601	0.144578
GSM1379289	m6Acluster.B	-0.280827	0.1361	0.138968	0.26759	0.200243	0.265487	-0.0826748	0.277286	-0.255088	0.295341	0.0214615	0.0086562	0.181549	0.312325	0.155176	0.0176599	-0.180112	0.294869	0.0713958	0.0743817	0.0542712	-0.00474352	0.119253
GSM1379290	m6Acluster.A	0.0114827	0.168758	0.3465	0.322134	0.23711	0.22477	0.0183586	0.232994	-0.0621151	0.340166	0.0566909	0.183456	0.354697	0.321479	0.214317	0.0670373	-0.242417	0.335408	0.179156	0.175715	0.195186	-0.0875624	0.1429
GSM1379291	m6Acluster.C	-0.141017	0.395528	0.425788	0.324706	0.207068	0.292726	0.00621513	0.313046	-0.13996	0.362227	0.0649184	0.0638837	0.374722	0.34394	0.169291	0.0865026	-0.196042	0.301475	0.239794	0.152964	0.108757	-0.0593798	0.19539
GSM1379292	m6Acluster.C	-0.218237	0.100621	0.165982	0.175388	0.16615	0.256353	-0.180509	0.19783	-0.253904	0.385517	-0.0703558	-0.0744509	0.124748	0.318971	0.11455	-0.0328754	-0.210416	0.304675	-0.0495853	0.0946879	0.0433703	-0.147333	0.0774322
GSM1379293	m6Acluster.A	-0.132694	0.141082	0.202048	0.194461	0.230223	0.256848	-0.0623379	0.253696	-0.225342	0.298809	-0.0983246	-0.10808	0.165054	0.31191	0.0779111	-0.0628526	-0.187917	0.238457	-0.0467524	0.0964894	0.0327616	-0.107118	0.0451169
GSM1379294	m6Acluster.B	-0.146571	0.260076	0.336022	0.254822	0.243122	0.228099	-0.0697858	0.308618	-0.183194	0.299058	0.00444106	-0.00255494	0.288134	0.324366	0.128959	0.0146115	-0.290335	0.300447	0.153555	0.170137	0.0864222	-0.0452466	0.167122
GSM1379295	m6Acluster.B	0.0622756	0.332668	0.31558	0.393483	0.237999	0.230342	-0.0289734	0.336903	-0.03981	0.378337	0.129336	0.10952	0.443121	0.328495	0.2024	0.054618	-0.158106	0.313908	0.258037	0.113481	0.131753	-0.0769118	0.156566
GSM1379296	m6Acluster.C	-0.298291	0.216579	0.177817	0.211774	0.254742	0.251434	-0.136124	0.258857	-0.261679	0.370606	-0.0324647	-0.0500016	0.175734	0.317433	0.128213	0.0218197	-0.224054	0.315691	0.0402007	0.110082	0.0619951	-0.0997427	0.12542
GSM1379297	m6Acluster.B	-0.111973	0.23776	0.280753	0.317034	0.210191	0.257822	-0.137858	0.259786	-0.142409	0.319285	0.0169816	-0.0230381	0.29168	0.341154	0.169902	0.0405795	-0.18996	0.238816	0.0932586	0.0783373	0.115743	-0.0512941	0.103055
GSM1379298	m6Acluster.A	-0.152323	0.193983	0.280774	0.256992	0.21484	0.263355	0.0907447	0.283832	-0.1708	0.351567	0.0988479	0.248094	0.384193	0.3266	0.190001	0.11487	-0.100152	0.354743	0.17135	0.157929	0.158984	-0.0754878	0.145427
GSM1379299	m6Acluster.C	-0.297693	0.254406	0.214607	0.249712	0.205651	0.262602	-0.141316	0.296002	-0.262899	0.318623	-0.0111007	-0.0147446	0.150642	0.329077	0.125005	0.0222542	-0.353331	0.258283	0.0464469	0.120065	0.00620626	-0.147169	0.123762
GSM1379300	m6Acluster.A	-0.213713	0.189008	0.26617	0.269228	0.214794	0.276557	-0.0889029	0.28146	-0.217771	0.320684	0.00340741	0.080535	0.268122	0.292783	0.195181	0.0502563	-0.257959	0.327902	0.0748999	0.134231	0.127455	-0.106868	0.0812502
GSM1379301	m6Acluster.B	0.107638	0.446802	0.45039	0.309785	0.232717	0.259856	-0.0707297	0.356731	0.0535915	0.36115	0.11216	0.0316778	0.466993	0.420627	0.144834	0.0749531	-0.268521	0.326937	0.254314	0.164777	0.111195	-0.121602	0.137358
GSM1379302	m6Acluster.C	-0.29063	0.230175	0.203934	0.216875	0.260591	0.229491	-0.11319	0.279748	-0.303075	0.307943	-0.073758	-0.0958861	0.133909	0.329839	0.0662042	-0.00276529	-0.301403	0.295716	0.0323241	0.0472257	0.0290331	-0.210123	0.0624332
GSM1379303	m6Acluster.A	0.00870595	0.308412	0.328853	0.305072	0.263208	0.287951	0.0256673	0.342736	-0.0981102	0.370919	0.0356292	0.0804509	0.351464	0.367412	0.174378	0.0973372	-0.201079	0.352076	0.226255	0.185168	0.131197	-0.0883212	0.127052
GSM1379304	m6Acluster.C	-0.313556	0.131362	0.208233	0.295471	0.239865	0.32117	-0.142418	0.27291	-0.243059	0.398794	0.00218936	0.0405464	0.302227	0.401897	0.139806	0.0231684	-0.238364	0.328633	0.1561	0.151335	0.109406	-0.0954606	0.0680786
GSM1379305	m6Acluster.C	-0.219031	0.244516	0.227187	0.239904	0.182293	0.281938	-0.113444	0.292446	-0.243975	0.303296	0.000401005	-0.0558705	0.222923	0.323215	0.166425	-0.00466757	-0.169838	0.321993	0.125073	0.128351	0.0413806	-0.106891	0.100533
GSM1379306	m6Acluster.B	-0.156933	0.36808	0.367803	0.302638	0.216429	0.24708	-0.0780475	0.223865	-0.144811	0.304571	-0.0123629	0.0498882	0.248941	0.341459	0.16197	0.0253088	-0.241731	0.265084	0.04935	0.0600096	0.122516	-0.102534	0.205095
GSM1379307	m6Acluster.A	0.110861	0.429398	0.543421	0.392428	0.288782	0.281134	-0.021841	0.433408	0.164587	0.424789	0.201155	0.169982	0.5756	0.411159	0.275835	0.156225	-0.201309	0.359477	0.407219	0.302675	0.273387	-0.0496577	0.227649
GSM1379308	m6Acluster.B	-0.0666782	0.373904	0.43469	0.331651	0.193511	0.281869	-0.142713	0.317987	-0.108758	0.33959	0.0541358	-0.0182973	0.32679	0.344693	0.167168	0.0640584	-0.113079	0.299062	0.173182	0.103356	0.120039	-0.0454018	0.0948682
GSM1379309	m6Acluster.C	-0.182445	0.218065	0.235818	0.251612	0.179858	0.259343	-0.142923	0.249213	-0.186027	0.333009	0.00554145	-0.0884763	0.235148	0.369614	0.140147	-0.0199888	-0.0513356	0.279536	0.0350702	0.105384	0.0793113	-0.0488528	0.129699
GSM1379310	m6Acluster.A	0.0544186	0.246646	0.34062	0.260534	0.238493	0.234023	-0.0459943	0.26	-0.0466029	0.336807	0.04506	0.0816239	0.339955	0.375819	0.157238	0.0366797	-0.26868	0.315392	0.131763	0.149671	0.130376	-0.0478363	0.134157
GSM1379311	m6Acluster.C	-0.304223	0.193619	0.208906	0.234643	0.242778	0.23307	-0.157561	0.255839	-0.288411	0.304774	-0.0717108	-0.023055	0.18769	0.361257	0.0990076	0.0124369	-0.163633	0.276099	0.0784334	0.107081	0.0747992	-0.0600722	0.0796696
GSM1379312	m6Acluster.A	-0.265078	0.244258	0.204449	0.287294	0.240921	0.263598	0.139368	0.233511	-0.215728	0.379038	-0.0349579	0.0834547	0.264547	0.382081	0.163251	-0.00831771	-0.208725	0.288709	0.160161	0.170887	0.0651391	-0.0821931	0.147507
GSM1379313	m6Acluster.B	-0.210883	0.290123	0.283657	0.25118	0.257889	0.22897	-0.14953	0.259146	-0.27636	0.337674	-0.00309619	0.000295557	0.257665	0.3212	0.0574536	0.0210652	-0.186513	0.278595	0.120347	0.0858968	0.0549228	-0.102764	0.186076
GSM1379314	m6Acluster.C	-0.254267	0.182904	0.120373	0.264076	0.230171	0.295241	-0.0865549	0.245105	-0.25544	0.363716	0.0166629	0.120787	0.231775	0.295298	0.158225	0.03755	-0.149586	0.292442	0.0237859	0.0849908	0.111533	-0.00788675	0.121336
GSM1379315	m6Acluster.C	-0.110441	0.360559	0.455372	0.305356	0.219174	0.251368	-0.0204147	0.294394	-0.10126	0.381255	0.0118257	0.00754453	0.333777	0.366506	0.188244	0.0560548	-0.205979	0.337064	0.213243	0.144469	0.150086	-0.0612918	0.216593
GSM1379316	m6Acluster.C	-0.30572	0.233964	0.18528	0.244227	0.222517	0.238382	-0.246571	0.279424	-0.279453	0.29345	-0.0457319	-0.0391207	0.153447	0.322647	0.142904	0.0552695	-0.22198	0.265231	0.0288937	0.0784893	0.0611048	-0.0355659	0.190557
GSM1379317	m6Acluster.B	-0.119614	0.390097	0.421262	0.357685	0.219851	0.281782	-0.118965	0.353401	-0.0855763	0.351852	0.0767517	0.0107106	0.391128	0.335328	0.189439	0.0638199	-0.172629	0.296555	0.255686	0.187118	0.1617	-0.0284424	0.209677
GSM1379318	m6Acluster.B	-0.151771	0.36352	0.464188	0.387579	0.22911	0.260364	-0.0843823	0.346788	-0.0885523	0.350277	0.117247	-0.0468813	0.429179	0.367524	0.203989	0.0757401	-0.196376	0.290667	0.289725	0.175716	0.164795	-0.0313342	0.145383
GSM1379319	m6Acluster.C	-0.202921	0.198288	0.276029	0.230718	0.197653	0.239412	-0.167447	0.254619	-0.256833	0.311719	-0.0121111	-0.0010266	0.246661	0.334571	0.13031	0.026852	-0.29546	0.233731	0.0906779	0.10177	0.0817322	-0.0860307	0.130066
GSM1379320	m6Acluster.A	-0.144384	0.31334	0.418288	0.312102	0.226126	0.263092	-0.0579831	0.302378	-0.129665	0.373609	0.0841217	0.0299994	0.380388	0.388308	0.186854	0.0377268	-0.18949	0.351426	0.230853	0.201971	0.132043	-0.125464	0.154195
GSM1379321	m6Acluster.B	-0.338263	0.190311	0.149647	0.187456	0.243221	0.24713	-0.227339	0.215314	-0.306361	0.290265	-0.0845286	-0.0540998	0.173052	0.319088	0.0732441	-0.0309024	-0.100561	0.268485	-0.0603452	0.107277	0.0130745	-0.0525264	0.170531
GSM1379322	m6Acluster.B	-0.151779	0.399921	0.387891	0.294398	0.199953	0.295304	-0.029477	0.307951	-0.102121	0.377997	0.0313017	-0.0230582	0.357279	0.359198	0.171589	0.0538838	-0.247649	0.291125	0.208729	0.146707	0.117292	-0.0562146	0.148089
GSM1379323	m6Acluster.C	-0.327816	0.218454	0.191461	0.249025	0.23062	0.249232	-0.150808	0.313068	-0.254021	0.348262	-0.0403805	-0.0345207	0.153552	0.315955	0.111432	0.00450288	-0.0348197	0.271774	0.0314374	0.0608747	0.0573203	-0.0531271	0.128414
GSM1379324	m6Acluster.B	-0.157746	0.240624	0.21148	0.275701	0.253762	0.25593	-0.148578	0.323756	-0.189049	0.340486	0.0217885	-0.0166064	0.219989	0.333223	0.0959573	0.0257117	-0.193608	0.252805	0.0870296	0.0953138	0.0771514	-0.0747524	0.165622
GSM1379325	m6Acluster.B	-0.188355	0.373892	0.349305	0.28216	0.213048	0.268896	-0.04158	0.337935	-0.190885	0.338591	0.024132	0.145348	0.322368	0.327169	0.149362	0.0311659	-0.178702	0.289991	0.182251	0.113551	0.123453	-0.0627724	0.215679
GSM1379326	m6Acluster.B	-0.18772	0.262692	0.33509	0.286503	0.241561	0.25131	-0.116598	0.27276	-0.160585	0.327091	-0.0146598	-0.0344244	0.263527	0.34636	0.153616	0.0592067	-0.272838	0.268156	0.0755695	0.0935367	0.104116	-0.0430974	0.163154
GSM1379327	m6Acluster.C	-0.201936	0.239177	0.284083	0.281427	0.184837	0.263566	-0.22197	0.304945	-0.199384	0.333677	-0.0476027	-0.0442466	0.23947	0.31706	0.115144	0.0334103	-0.29687	0.277455	0.127941	0.112663	0.0833066	-0.112983	0.111558
GSM1379328	m6Acluster.A	0.176467	0.416864	0.543863	0.362759	0.26822	0.240996	0.0248635	0.337376	0.136696	0.354783	0.156584	0.0663266	0.501936	0.380598	0.262042	0.101448	-0.195741	0.351171	0.290718	0.245532	0.249529	-0.0487673	0.210984
GSM1379329	m6Acluster.B	-0.289718	0.151333	0.259944	0.269113	0.24417	0.253455	-0.0590264	0.297149	-0.235455	0.325838	0.0106153	0.0423024	0.237784	0.312091	0.170521	0.0656176	-0.285688	0.316961	0.129752	0.135892	0.0726825	-0.0804836	0.0666837
GSM1379330	m6Acluster.A	0.258679	0.214951	0.388707	0.278303	0.19552	0.210067	0.0793087	0.228962	0.115619	0.349892	0.0868784	0.138125	0.409962	0.383819	0.19369	0.0460564	-0.278713	0.334355	0.158979	0.20843	0.171742	-0.0829755	0.152761
GSM1523727	m6Acluster.A	-0.258023	0.144954	0.176596	0.232136	0.191181	0.239508	-0.165793	0.216974	-0.244379	0.308345	-0.0773066	-0.0997312	0.162164	0.346089	0.101385	-0.0351691	-0.315743	0.205431	0.0188376	0.0413322	0.0433073	-0.0315489	0.0377015
GSM1523728	m6Acluster.B	-0.210752	0.356031	0.314617	0.314166	0.197871	0.234042	-0.0711939	0.309389	-0.168513	0.332299	0.0946093	0.029645	0.344168	0.349669	0.175202	0.0856017	-0.157503	0.279883	0.185045	0.116022	0.116976	-0.0306487	0.145034
GSM1523729	m6Acluster.B	-0.244139	0.225074	0.228378	0.245074	0.198675	0.243912	0.0460904	0.290497	-0.20148	0.323813	0.0118668	0.0443823	0.233464	0.341646	0.141471	-0.00305698	-0.202287	0.279557	0.0424676	0.0939825	0.0852736	-0.074653	0.181512
GSM1523744	m6Acluster.B	-0.253057	0.310646	0.229098	0.28512	0.192465	0.285701	-0.162748	0.262636	-0.239825	0.318026	-0.0361222	-0.041076	0.180471	0.314349	0.129131	0.0895008	-0.350728	0.233387	0.126204	0.0478827	0.0652274	-0.021221	0.12993
GSM1523745	m6Acluster.B	-0.25468	0.337737	0.260184	0.286191	0.19954	0.255999	-0.0863716	0.299611	-0.225083	0.329091	0.0247528	0.00915181	0.277375	0.309405	0.130125	0.0473474	-0.16168	0.275905	0.174932	0.106761	0.0816591	-0.0572444	0.231168
GSM1523746	m6Acluster.C	-0.193704	0.254208	0.212549	0.235692	0.22028	0.238533	-0.00134205	0.303029	-0.257279	0.336677	0.0325952	0.079708	0.218538	0.279759	0.103832	-0.0122111	-0.219476	0.257969	0.103605	0.0746043	0.0726443	-0.150453	0.16394
GSM1523747	m6Acluster.C	-0.329851	0.248684	0.216649	0.267813	0.190766	0.256098	-0.215342	0.294467	-0.259337	0.290496	0.0162871	-0.126207	0.223704	0.335208	0.114302	0.00860344	-0.103489	0.240199	0.144736	0.0989927	0.042828	-0.13171	0.165494
GSM1523748	m6Acluster.B	-0.088024	0.206436	0.266229	0.26083	0.239166	0.22536	-0.0294298	0.331375	-0.162505	0.354545	0.0331777	0.0447152	0.316476	0.335821	0.119916	-0.000716707	-0.212761	0.294813	0.152669	0.118166	0.103916	-0.0684397	0.160139
GSM1523765	m6Acluster.C	-0.281994	0.243411	0.222323	0.247658	0.161066	0.267191	-0.0923841	0.257285	-0.311843	0.336981	-0.0327737	-0.036371	0.146249	0.284861	0.0962099	0.0532802	-0.379658	0.269186	0.116802	0.0686814	0.0531758	-0.09252	0.0813225
GSM1523768	m6Acluster.C	-0.221199	0.285258	0.297682	0.342668	0.238895	0.273428	-0.0535566	0.308962	-0.200714	0.381045	0.087682	0.185662	0.388146	0.337767	0.19565	0.0805816	-0.124057	0.331665	0.222186	0.154702	0.155985	-0.0367224	0.179808
GSM1523769	m6Acluster.B	0.110424	0.318186	0.396579	0.299218	0.255894	0.270353	0.0431822	0.383464	0.0177526	0.388871	0.149307	0.143584	0.425048	0.375889	0.179184	0.0846451	-0.0971522	0.345599	0.245225	0.191719	0.18141	-0.0812046	0.177581
GSM1523770	m6Acluster.B	-0.262289	0.401441	0.409074	0.331883	0.193161	0.234678	-0.0968602	0.257884	-0.143964	0.307996	0.0339127	0.0173812	0.349171	0.288742	0.163584	0.0630359	-0.225807	0.275415	0.213616	0.13757	0.105149	-0.124792	0.119836
GSM1523771	m6Acluster.A	-0.198315	0.190017	0.405376	0.29491	0.217833	0.209947	-0.0043222	0.310165	-0.076275	0.376272	0.138376	0.194049	0.425657	0.331666	0.223197	0.120782	-0.198923	0.36446	0.220242	0.197534	0.193452	-0.118975	0.180328
GSM1523772	m6Acluster.A	-0.105628	0.0829526	0.271018	0.251129	0.220045	0.251746	-0.0514727	0.219286	-0.178624	0.355831	0.0547957	0.0348786	0.298321	0.328015	0.199506	0.0569642	-0.321577	0.344541	0.0866523	0.149935	0.129368	-0.0510421	0.151328
GSM1523773	m6Acluster.A	-0.0882831	0.199324	0.353059	0.277772	0.205203	0.194655	0.0386091	0.208048	-0.0991418	0.333686	0.0549422	0.186673	0.380982	0.34019	0.194946	0.0472548	-0.220954	0.347275	0.156441	0.211453	0.16583	-0.0998848	0.177849
GSM1523774	m6Acluster.A	0.104965	0.185795	0.260989	0.234483	0.222179	0.175707	0.0910948	0.248833	-0.0338034	0.342084	0.00782358	0.143863	0.315177	0.323157	0.174196	-0.00314997	-0.203918	0.308404	0.130821	0.126505	0.140235	-0.123865	0.154598
GSM1523775	m6Acluster.B	-0.214143	0.28696	0.276517	0.245115	0.169709	0.266019	-0.111884	0.291396	-0.21739	0.297641	-0.0313248	0.0260734	0.272039	0.313371	0.0960473	0.0148838	-0.192756	0.278009	0.117264	0.075069	0.058315	-0.0869579	0.140513
GSM1523776	m6Acluster.B	-0.107287	0.404214	0.400547	0.304645	0.203317	0.254739	-0.114745	0.235427	-0.113581	0.322868	-0.00809423	-0.126067	0.248206	0.33938	0.185493	0.0126503	-0.324163	0.266308	0.0929788	0.116097	0.108324	-0.100478	0.0845812
GSM1523777	m6Acluster.B	-0.280613	0.18766	0.169019	0.240694	0.176879	0.296363	-0.127424	0.261297	-0.301223	0.308911	-0.0873971	-0.0858435	0.12789	0.281468	0.119539	-0.00081772	-0.270747	0.281807	0.0596655	0.0568664	0.0267485	-0.150082	0.0308443
GSM1523778	m6Acluster.A	-0.135253	0.291556	0.295428	0.298966	0.250491	0.29419	-0.0452191	0.331611	-0.141406	0.368219	0.091549	0.102257	0.39977	0.365785	0.180222	0.0623683	-0.0470711	0.367489	0.24599	0.183317	0.148298	0.0022814	0.186037
GSM1523779	m6Acluster.B	-0.0615858	0.300877	0.350409	0.283902	0.207004	0.253802	-0.104992	0.327223	-0.112635	0.325071	0.0202039	-0.0389218	0.323554	0.332351	0.152086	0.0125901	-0.246403	0.262276	0.141052	0.117589	0.0766534	-0.0640471	0.149078
GSM1523780	m6Acluster.B	-0.280421	0.306819	0.322514	0.274446	0.197534	0.251665	-0.200124	0.32559	-0.185978	0.339574	0.0161251	0.00810445	0.27456	0.35253	0.164002	0.0748005	-0.209277	0.300508	0.165214	0.138028	0.120983	-0.0694412	0.233724
GSM1523781	m6Acluster.C	-0.388572	0.148791	0.0656801	0.148959	0.149224	0.278139	-0.214995	0.260611	-0.344141	0.377888	-0.0509792	-0.121473	0.0692318	0.282417	0.0890637	-0.0709589	-0.22975	0.296192	-0.00669876	0.108064	-0.00613482	-0.188596	0.114778
GSM1523782	m6Acluster.C	-0.342735	0.289936	0.221538	0.304928	0.213887	0.28338	-0.144999	0.284493	-0.221669	0.328685	0.00226371	0.0357847	0.310688	0.308417	0.178882	0.0967312	-0.195367	0.306111	0.198803	0.11402	0.102146	-0.0482634	0.191017
GSM1523783	m6Acluster.A	0.307167	0.24511	0.370574	0.330487	0.227357	0.270259	0.0958224	0.321546	0.167889	0.387877	0.0597534	0.092708	0.408714	0.387634	0.170055	0.0264914	0.0104876	0.324258	0.211456	0.184069	0.135878	-0.0368811	0.123077
GSM1523784	m6Acluster.A	-0.0610953	0.269922	0.323198	0.304577	0.248372	0.22951	0.0609231	0.300281	-0.105759	0.382459	0.0949012	0.0855555	0.367787	0.355087	0.16505	0.00142802	-0.0848609	0.321666	0.132806	0.147357	0.127766	-0.0837408	0.198345
GSM1523785	m6Acluster.A	-0.103013	0.268045	0.331782	0.318238	0.246188	0.274256	-0.0725545	0.314295	-0.151176	0.34875	0.0177806	-0.0270055	0.320986	0.347373	0.175238	0.063619	-0.201783	0.295711	0.155742	0.129793	0.133889	-0.0253885	0.135647
GSM1523786	m6Acluster.A	0.124893	0.327697	0.392652	0.312807	0.254507	0.227328	0.0598262	0.301391	0.00154447	0.386941	0.0812835	0.0651595	0.426394	0.36539	0.172877	0.0380417	-0.23599	0.333104	0.146976	0.172776	0.139152	-0.083503	0.153778
GSM1523787	m6Acluster.C	-0.248581	0.179857	0.215941	0.199078	0.215057	0.24775	-0.273471	0.202734	-0.260962	0.26444	-0.0752145	-0.0776658	0.146864	0.337776	0.0877482	-0.0110094	-0.210295	0.277324	-0.00899466	0.0600153	0.0355631	-0.0708917	0.172459
GSM1523788	m6Acluster.B	0.188543	0.277971	0.348269	0.280526	0.268559	0.225976	0.0779376	0.319982	0.0251435	0.401563	0.110341	0.185506	0.418774	0.351404	0.17356	0.0882162	-0.183395	0.352649	0.24376	0.180775	0.167251	-0.0870883	0.19554
GSM1523789	m6Acluster.B	-0.333217	0.163578	0.255844	0.250157	0.197217	0.249001	-0.158843	0.296904	-0.22876	0.350681	0.0621803	-0.0549953	0.270759	0.31571	0.170372	0.059839	-0.264174	0.326194	0.166581	0.140632	0.078391	-0.0663863	0.167829
GSM1523790	m6Acluster.B	-0.261952	0.375012	0.402558	0.394423	0.214448	0.260316	-0.0126058	0.323002	-0.109445	0.351012	0.119014	0.112072	0.410532	0.363884	0.202218	0.113445	0.0290278	0.329815	0.273465	0.161986	0.162218	-0.0352895	0.259783
GSM1523791	m6Acluster.B	-0.173949	0.363461	0.384284	0.32729	0.24069	0.209627	-0.151962	0.28226	-0.100014	0.321006	0.0349435	0.0362457	0.342087	0.35132	0.214038	0.0953012	-0.241559	0.28486	0.193781	0.144467	0.144905	-0.0341153	0.22057
GSM1523792	m6Acluster.B	-0.141243	0.326519	0.319583	0.252591	0.209523	0.253001	-0.0654257	0.289267	-0.196633	0.323602	-0.0337761	-0.0376218	0.221311	0.317462	0.0852282	-0.00534031	-0.257329	0.277333	0.0835331	0.0900579	0.049888	-0.0761517	0.172807
GSM1523793	m6Acluster.B	-0.0751237	0.32566	0.370916	0.269765	0.229431	0.251715	-0.108436	0.303576	-0.150346	0.302833	-0.0153347	0.00944869	0.31292	0.324953	0.185983	0.021163	-0.153828	0.299499	0.138518	0.118521	0.0881965	-0.0218469	0.159655
GSM1523794	m6Acluster.A	-0.262003	0.270728	0.444208	0.33452	0.216733	0.269665	-0.116979	0.393614	-0.154183	0.37461	0.061385	0.0427147	0.427752	0.364182	0.207773	0.121702	-0.0632089	0.267594	0.229461	0.177001	0.176049	-0.0197369	0.252236
GSM1523795	m6Acluster.C	-0.248638	0.269863	0.273685	0.300427	0.200726	0.27348	-0.173882	0.311928	-0.22045	0.362036	0.00578706	0.0574584	0.263494	0.375129	0.146646	0.0521117	-0.12451	0.315455	0.194402	0.156594	0.0868606	-0.155685	0.0973932
GSM1523796	m6Acluster.A	-0.152815	0.232081	0.311113	0.376726	0.239566	0.254125	0.0191053	0.39576	-0.083858	0.403714	0.232896	0.247406	0.492827	0.375082	0.226895	0.11062	0.130769	0.415453	0.330725	0.227125	0.196211	-0.0860281	0.155835
GSM1523797	m6Acluster.B	-0.234215	0.237134	0.294454	0.2637	0.215873	0.253431	-0.0592342	0.303783	-0.185892	0.353241	-0.00811111	0.0214993	0.294261	0.332859	0.0769611	0.0121075	-0.118708	0.273291	0.0992169	0.101104	0.0769944	-0.0544451	0.204154
GSM1523798	m6Acluster.B	0.374195	0.43454	0.53325	0.358162	0.291258	0.274284	0.120973	0.4079	0.254447	0.379288	0.177202	0.22763	0.566162	0.41309	0.226647	0.123484	-0.0797073	0.372206	0.305208	0.265297	0.209392	-0.0691135	0.217072
GSM1523799	m6Acluster.C	-0.213572	0.338206	0.288728	0.32673	0.209778	0.274326	-0.087405	0.310332	-0.12353	0.385525	0.0759216	0.153168	0.371924	0.329271	0.19131	0.0527586	-0.145075	0.337103	0.242891	0.177766	0.0527789	-0.149382	0.221962
GSM1523800	m6Acluster.B	-0.216427	0.416236	0.430477	0.350804	0.167142	0.228336	-0.102316	0.328997	-0.086311	0.333037	0.0507081	0.00989195	0.39894	0.353616	0.17227	0.111165	-0.198497	0.280387	0.226347	0.149041	0.126673	-0.0753748	0.0718791
GSM1523801	m6Acluster.B	-0.131202	0.359695	0.37865	0.298606	0.196869	0.280854	-0.0578456	0.294974	-0.120811	0.299821	-0.00400656	-0.0426691	0.314613	0.343053	0.166159	0.0660906	-0.240542	0.249115	0.149783	0.124828	0.122183	0.000709783	0.173585
GSM1523802	m6Acluster.A	-0.18489	0.257494	0.254923	0.311296	0.239564	0.252122	-0.14876	0.324133	-0.180002	0.371503	0.0325289	0.015584	0.312469	0.336009	0.151902	0.0257212	-0.0525479	0.280237	0.125857	0.128281	0.0786437	-0.0544594	0.104748
GSM1523803	m6Acluster.C	-0.110746	0.307819	0.295216	0.256949	0.200135	0.239295	-0.0510183	0.275387	-0.166383	0.328653	0.00318835	0.0274407	0.293998	0.316824	0.135899	-0.00146885	-0.223914	0.271716	0.12968	0.137395	0.0657831	-0.093829	0.151763
GSM1523804	m6Acluster.A	0.0742828	0.316052	0.336449	0.304716	0.221162	0.276445	0.00383287	0.348597	-0.0408448	0.376186	0.0982321	0.104196	0.391001	0.353429	0.148503	0.0495267	-0.17087	0.311292	0.217537	0.182766	0.142307	-0.0711007	0.18146
GSM1523805	m6Acluster.B	-0.070063	0.356918	0.415627	0.315745	0.231032	0.268869	-0.0657086	0.315421	-0.0644542	0.370467	0.0593202	0.0630257	0.402593	0.340282	0.205952	0.0554974	-0.176798	0.320028	0.203535	0.158321	0.150214	-0.0518857	0.184385
GSM1523806	m6Acluster.C	-0.0952209	0.259486	0.307092	0.284735	0.21249	0.285591	-0.0536666	0.307785	-0.120222	0.355674	0.0401255	0.0473751	0.333946	0.348526	0.153794	0.0196611	-0.186412	0.285819	0.156685	0.129709	0.0852992	-0.0476864	0.121276
GSM1523807	m6Acluster.C	-0.0831179	0.344271	0.305972	0.316596	0.230919	0.283193	0.0284627	0.342119	-0.106975	0.394318	0.0814758	0.164309	0.381605	0.359286	0.18736	0.0336759	0.0218175	0.339605	0.232917	0.19616	0.118381	-0.0971229	0.170148
GSM1523808	m6Acluster.B	0.0053134	0.316988	0.386315	0.307031	0.225181	0.266944	0.0417966	0.351885	-0.0483695	0.371466	0.10573	0.0990452	0.389786	0.358666	0.194614	0.0796629	-0.0720029	0.349345	0.239129	0.199584	0.147753	-0.0585822	0.175863
GSM1523809	m6Acluster.C	-0.132664	0.331977	0.34275	0.307919	0.19106	0.260612	-0.0906905	0.304095	-0.165261	0.299273	0.0012742	-0.00378387	0.340132	0.327692	0.134539	0.0451636	-0.235783	0.265254	0.142493	0.113222	0.0935654	-0.0249452	0.0845924
GSM1523810	m6Acluster.B	-0.0671128	0.414757	0.482615	0.356652	0.242566	0.279372	-0.0693163	0.346857	-0.0462895	0.354163	0.0958479	0.0690986	0.476847	0.358493	0.255753	0.11992	-0.206463	0.312619	0.271551	0.185856	0.192643	0.0127662	0.221548
GSM1523811	m6Acluster.B	0.0289988	0.388182	0.415511	0.320026	0.240159	0.257139	-0.0513234	0.344012	-0.0281663	0.355991	0.042798	0.0546055	0.402964	0.358456	0.172928	0.0501173	-0.175612	0.28182	0.205886	0.140151	0.133386	-0.0515584	0.20164
GSM1523812	m6Acluster.A	-0.014601	0.401645	0.464607	0.311049	0.255555	0.246515	-0.0352196	0.346066	-0.0291405	0.37389	0.12341	0.140544	0.455381	0.36732	0.222487	0.0905524	-0.179304	0.322562	0.259738	0.209261	0.175322	-0.0676448	0.191587
GSM1523813	m6Acluster.B	-0.321372	0.260179	0.241208	0.239035	0.183801	0.21791	-0.00239202	0.273044	-0.275897	0.331486	0.0205597	0.0229861	0.186701	0.309699	0.13531	0.0626429	-0.224628	0.26558	0.135434	0.0867064	0.0586211	-0.0448885	0.179949
GSM1523814	m6Acluster.C	-0.184925	0.29999	0.285307	0.302253	0.19894	0.261218	-0.0888733	0.285338	-0.154192	0.335876	0.0258062	0.0302061	0.2877	0.344581	0.129864	0.0249562	-0.271395	0.293393	0.22965	0.161755	0.0885613	-0.0688673	0.133
GSM1523815	m6Acluster.C	-0.22113	0.266125	0.320323	0.225004	0.228313	0.231945	-0.23472	0.299374	-0.192379	0.299539	-0.00174551	-0.132893	0.18737	0.325989	0.135856	0.0187232	-0.353517	0.270184	0.125687	0.0881575	0.075885	-0.129725	0.185566
GSM1523816	m6Acluster.C	-0.313584	0.215324	0.242719	0.235611	0.222253	0.267867	-0.163034	0.246499	-0.278689	0.335034	-0.019716	-0.054855	0.199218	0.333464	0.0871249	0.0245956	-0.244971	0.262948	0.0649855	0.0694749	0.0740896	-0.0555199	0.154623
GSM1523817	m6Acluster.C	-0.177623	0.174019	0.154825	0.186915	0.24132	0.222978	-0.125519	0.296703	-0.203172	0.337587	-0.102508	0.0570757	0.128533	0.314048	0.139501	0.0164041	-0.306821	0.281249	0.0445752	0.12709	0.00112716	-0.124863	0.132598
GSM1523818	m6Acluster.B	-0.163514	0.238757	0.285066	0.293469	0.217972	0.259896	-0.151867	0.240079	-0.181326	0.306477	-0.00556986	-0.053992	0.294691	0.339624	0.131529	0.000581051	-0.247555	0.221819	0.0772879	0.085229	0.0664978	-0.0480237	0.079319
GSM1523819	m6Acluster.C	-0.301325	0.155804	0.151032	0.180983	0.185168	0.317221	-0.223138	0.255393	-0.269408	0.259797	-0.0168695	-0.0358911	0.139431	0.350725	0.127527	0.0228283	-0.2314	0.286992	0.0602605	0.0832387	0.0316929	-0.122116	0.0519188
GSM1523820	m6Acluster.C	-0.270204	0.221949	0.264385	0.299898	0.227776	0.293086	-0.117524	0.326634	-0.19956	0.348633	-0.011295	-0.00630047	0.274485	0.41765	0.130556	0.0463472	0.0527174	0.315341	0.162648	0.12954	0.0534998	-0.0696625	0.139651
GSM1523821	m6Acluster.A	-0.104925	0.332311	0.301201	0.296423	0.196147	0.261984	-0.0877473	0.312391	-0.164248	0.32533	0.0127585	-0.0469387	0.311359	0.330051	0.13861	0.0135553	-0.149941	0.241508	0.102059	0.09718	0.12109	-0.0308919	0.157723
GSM1523822	m6Acluster.A	-0.170818	0.337068	0.392432	0.369189	0.247528	0.23884	-0.0135249	0.346817	-0.0857206	0.367621	0.138432	0.114857	0.45244	0.353299	0.218948	0.0688288	0.116332	0.338686	0.226024	0.172709	0.139916	-0.00752544	0.225823
GSM1523823	m6Acluster.B	-0.107641	0.428437	0.386826	0.368165	0.224455	0.19861	-0.0929151	0.293991	-0.0496076	0.32411	0.0485977	0.0518954	0.399311	0.371471	0.188286	0.0792433	-0.12022	0.309957	0.200761	0.127886	0.14433	-0.0454972	0.130491
GSM1523824	m6Acluster.C	-0.195347	0.307106	0.275757	0.300077	0.191957	0.262663	-0.0207982	0.272555	-0.205135	0.34167	-0.0373862	-0.00221669	0.267131	0.319727	0.170057	0.0358434	-0.244469	0.286849	0.166013	0.129495	0.0861466	-0.0223942	0.0846057
GSM1523825	m6Acluster.B	-0.364728	0.10954	0.103713	0.230673	0.209228	0.246409	-0.269934	0.292196	-0.253939	0.388948	-0.113469	-0.0478856	0.0919183	0.278937	0.0790852	0.0518146	-0.286361	0.279651	0.0835677	0.0551975	0.0623232	-0.126318	0.11572
GSM1523826	m6Acluster.C	0.0546404	0.292491	0.376265	0.336983	0.248178	0.250636	-0.0903797	0.347062	-0.0611116	0.354305	0.0468321	0.053965	0.32827	0.373403	0.161	0.0181815	-0.142984	0.319605	0.207417	0.176948	0.107413	-0.0756298	0.147623
GSM1523827	m6Acluster.A	0.242449	0.331538	0.439809	0.299332	0.249102	0.243556	0.0914106	0.31903	0.0903054	0.396335	0.099917	0.0800991	0.462566	0.374819	0.212247	0.0336123	-0.128557	0.300737	0.228091	0.196988	0.159813	-0.0526678	0.176929
GSM1523828	m6Acluster.A	-0.0667664	0.279066	0.269074	0.313683	0.251033	0.202313	-0.0607721	0.329524	-0.154699	0.385569	0.0849738	0.15525	0.370182	0.336969	0.163209	0.0746269	-0.230582	0.322593	0.24361	0.182196	0.131881	-0.0921618	0.163391
GSM1523829	m6Acluster.C	-0.210333	0.198952	0.249482	0.212967	0.233451	0.252828	-0.146702	0.307072	-0.214246	0.351416	0.0384126	-0.0307942	0.214822	0.430071	0.13823	-0.00691514	-0.112641	0.278082	0.0922094	0.10624	0.0477801	-0.140846	0.10241
GSM1523830	m6Acluster.B	-0.101513	0.37671	0.369297	0.307562	0.17575	0.302399	-0.0768598	0.303725	-0.106566	0.335714	0.0516621	0.0222548	0.313152	0.358236	0.186228	0.0131349	-0.218344	0.246665	0.131961	0.119408	0.103799	-0.068669	0.105765
GSM1523831	m6Acluster.C	-0.280487	0.247519	0.161404	0.218573	0.216937	0.238535	-0.106867	0.246545	-0.275473	0.30439	-0.0593268	-0.0590446	0.141283	0.293107	0.122419	-0.0138178	-0.234936	0.280031	0.0726427	0.0885774	0.0357142	-0.0875434	0.153707
GSM1523832	m6Acluster.A	-0.00896392	0.267931	0.30648	0.29979	0.267802	0.258432	-0.111587	0.314821	-0.113797	0.357201	0.0301663	0.022984	0.312399	0.337343	0.186394	0.0326282	-0.180449	0.287331	0.131559	0.127224	0.110892	-0.0834074	0.157778
GSM1523833	m6Acluster.B	-0.242059	0.300013	0.269895	0.250016	0.234012	0.245036	-0.156939	0.313266	-0.222288	0.350677	0.016071	0.0961269	0.226115	0.328725	0.116525	0.025141	-0.164325	0.273474	0.118614	0.0942186	0.0765201	-0.0892391	0.140653
GSM1523834	m6Acluster.A	0.159163	0.343953	0.429168	0.353602	0.262639	0.268545	0.0610169	0.398062	0.0752188	0.422387	0.216709	0.237325	0.506867	0.3673	0.209445	0.0831958	0.00715536	0.33591	0.320231	0.233305	0.201216	-0.05057	0.15579
GSM1523835	m6Acluster.C	-0.250222	0.191288	0.112635	0.226494	0.212796	0.242208	-0.215782	0.283954	-0.289502	0.337691	0.0136243	0.0688442	0.270102	0.312172	0.158141	0.0316252	-0.265118	0.312718	0.13659	0.152651	0.059327	-0.115413	0.137257
GSM1523836	m6Acluster.B	-0.128558	0.392884	0.333924	0.349528	0.22717	0.239169	-0.00592168	0.329236	-0.0654801	0.393816	0.149791	0.184615	0.427891	0.335874	0.169899	0.0472677	0.0689023	0.332979	0.236294	0.163492	0.13638	-0.112675	0.144067
GSM1523837	m6Acluster.C	-0.274356	0.181635	0.194389	0.192722	0.145754	0.260943	-0.00496019	0.257182	-0.280253	0.264161	-0.0611325	-0.0734325	0.11992	0.340867	0.075814	-0.0459725	-0.215494	0.28829	0.0311489	0.0513643	0.0548179	-0.106222	0.0606892
GSM1523838	m6Acluster.B	-0.105598	0.406826	0.419165	0.353358	0.183746	0.225279	-0.0916935	0.322775	-0.0880921	0.353797	0.0589535	0.0916243	0.411752	0.333372	0.200449	0.0834122	-0.208462	0.297876	0.254978	0.147274	0.178731	-0.0772386	0.181179
GSM1523839	m6Acluster.A	-0.0757267	0.279563	0.230789	0.318038	0.269036	0.265108	0.0387197	0.336234	-0.107554	0.3981	0.15394	0.165012	0.418107	0.355869	0.196125	0.0712114	0.0306188	0.362753	0.310878	0.209089	0.158355	-0.0133722	0.220019
GSM1523840	m6Acluster.B	-0.241115	0.307853	0.269385	0.261441	0.240999	0.222806	-0.144471	0.282104	-0.28175	0.298288	-0.0183194	0.015322	0.183347	0.320053	0.13353	-0.00720016	-0.215559	0.251938	0.126639	0.0552991	0.0668012	-0.0872625	0.231891
GSM1523841	m6Acluster.C	-0.198903	0.309602	0.278253	0.254372	0.212563	0.249675	-0.0887485	0.316062	-0.165693	0.310595	0.0534116	-0.00670152	0.298804	0.316896	0.158526	0.0331188	-0.170044	0.296518	0.202911	0.148434	0.0858133	-0.0799818	0.17074
GSM1523842	m6Acluster.C	-0.0386667	0.289272	0.346806	0.273921	0.254797	0.254546	-0.0027823	0.329341	-0.133123	0.374433	0.0232467	0.0593451	0.301234	0.326699	0.143937	0.00533458	-0.235048	0.292932	0.120558	0.138363	0.0940782	-0.119468	0.153729
GSM1523843	m6Acluster.A	-0.0481005	0.269748	0.303344	0.262296	0.24863	0.25461	-0.0453133	0.306235	-0.0888029	0.366307	0.0627429	0.0936566	0.35882	0.352868	0.16514	0.0544639	-0.271613	0.315765	0.174453	0.162744	0.13884	-0.060834	0.194099
GSM1523844	m6Acluster.C	-0.313859	0.186812	0.137299	0.258346	0.210832	0.259585	-0.275673	0.28909	-0.247073	0.370199	0.0625503	0.0595841	0.20742	0.317164	0.175038	0.0597847	-0.300672	0.303757	0.187915	0.103361	0.081984	-0.133793	0.146419
GSM1523845	m6Acluster.C	-0.130702	0.318576	0.305057	0.348418	0.256603	0.30114	-0.0993931	0.34006	-0.102967	0.369991	0.1275	0.0811798	0.435285	0.342953	0.220402	0.108281	-0.166107	0.320803	0.317339	0.201046	0.151865	-0.104828	0.152375
GSM1523846	m6Acluster.A	0.00444561	0.310181	0.399647	0.295307	0.260833	0.221602	-0.00256148	0.306247	-0.0429421	0.353412	0.0784171	0.0973712	0.421735	0.34749	0.210187	0.0766197	-0.211251	0.325159	0.208091	0.173645	0.139781	-0.10731	0.163779
GSM1523847	m6Acluster.B	-0.285153	0.331936	0.285591	0.331906	0.21887	0.283441	-0.0830124	0.25904	-0.144427	0.35092	0.00460163	-0.00731305	0.29396	0.337274	0.147344	0.0350644	-0.207547	0.262207	0.142147	0.114988	0.120743	-0.0953304	0.152816
GSM1523848	m6Acluster.B	0.205634	0.434339	0.546933	0.347685	0.249669	0.281629	0.0510142	0.347198	0.125878	0.374049	0.128671	0.122357	0.522283	0.396119	0.278552	0.139143	-0.253844	0.316979	0.316529	0.279793	0.239336	-0.0852375	0.192295
GSM1523849	m6Acluster.B	-0.252132	0.320529	0.318959	0.307153	0.236684	0.225229	-0.0631261	0.354295	-0.159187	0.36377	0.085963	0.0878794	0.382477	0.313573	0.211376	0.0713855	-0.129287	0.358425	0.283462	0.1915	0.135041	-0.145897	0.168631
GSM1523850	m6Acluster.A	-0.0731467	0.223687	0.323829	0.235388	0.224069	0.233952	0.0128006	0.245368	-0.137089	0.350607	0.0063597	0.0425746	0.276139	0.329222	0.190282	0.0325023	-0.29161	0.336047	0.0811011	0.145231	0.128709	-0.13142	0.176033
GSM1523851	m6Acluster.B	-0.23447	0.402597	0.350377	0.343807	0.223352	0.236679	-0.122252	0.310649	-0.129344	0.360895	0.0354869	0.0774593	0.372867	0.336254	0.168082	0.0668046	-0.0773331	0.298824	0.203144	0.105175	0.133833	-0.0296294	0.194552
GSM1523852	m6Acluster.A	0.0571985	0.286798	0.393195	0.312949	0.240865	0.250771	-0.0212734	0.338579	-0.0364314	0.359729	0.0561967	0.0388788	0.342422	0.350107	0.168522	-0.0147567	-0.0737621	0.279848	0.143195	0.155781	0.124403	-0.0328671	0.133779
GSM1523853	m6Acluster.B	-0.221079	0.273202	0.260482	0.222478	0.230055	0.271605	-0.0420662	0.300647	-0.232748	0.335783	-0.00148376	0.0495559	0.197821	0.295362	0.123014	-0.0107245	-0.228995	0.298665	0.13079	0.100445	0.0942417	-0.0521723	0.165746
GSM1523854	m6Acluster.C	-0.0630945	0.33776	0.389246	0.309891	0.239008	0.250596	-0.0789419	0.389009	-0.0966723	0.354906	0.128554	0.029785	0.377119	0.325412	0.189038	0.0634048	-0.139581	0.31223	0.255092	0.171735	0.144032	-0.0509681	0.194472
GSM1523855	m6Acluster.C	-0.276081	0.157216	0.204159	0.244089	0.271426	0.217563	-0.0126778	0.265855	-0.28916	0.2798	-0.00150189	0.0149411	0.190446	0.320222	0.102497	-0.0242556	-0.164242	0.280222	0.0871677	0.113813	0.0539699	-0.0829481	0.00946211
GSM1523856	m6Acluster.B	-0.265022	0.341747	0.344156	0.266311	0.237887	0.228398	-0.152065	0.334218	-0.230747	0.389118	0.017858	0.0386498	0.298292	0.295368	0.156047	0.0691872	-0.234105	0.26662	0.182369	0.108574	0.124598	-0.0910785	0.22144
GSM1523857	m6Acluster.A	-0.222256	0.157159	0.249537	0.223128	0.202778	0.219269	-0.073456	0.282136	-0.202257	0.322745	0.0133953	0.0579645	0.247575	0.287199	0.149203	0.0282106	-0.21298	0.303988	0.0702852	0.126211	0.119028	-0.0712209	0.118396
GSM1523858	m6Acluster.A	-0.207482	-0.0378087	0.212115	0.154244	0.169684	0.162724	-0.0179316	0.18257	-0.186039	0.316324	0.0169709	0.194407	0.200936	0.300158	0.192309	0.0346019	-0.338482	0.322817	0.103481	0.112592	0.142276	-0.191502	0.130354
GSM1523859	m6Acluster.A	-0.157646	0.258205	0.225458	0.283499	0.243154	0.255149	-0.108934	0.259296	-0.207045	0.361588	0.0233679	0.00719804	0.250765	0.352764	0.154193	0.0470428	-0.233796	0.322282	0.150821	0.142313	0.126553	-0.0583243	0.0886499
GSM1523860	m6Acluster.B	-0.18931	0.35358	0.366797	0.350165	0.231845	0.231272	-0.0937925	0.315745	-0.132406	0.35023	0.0924787	0.0367134	0.361002	0.353627	0.195474	0.0997714	-0.162543	0.246315	0.203467	0.144971	0.141876	-0.031443	0.109458
GSM1523861	m6Acluster.A	-0.2114	0.308633	0.3539	0.294872	0.255367	0.237897	0.0145621	0.368448	-0.164308	0.347372	0.0328354	0.0768037	0.327793	0.314653	0.152404	0.0193478	-0.0480383	0.312321	0.191953	0.128247	0.097486	-0.0844358	0.212484
GSM1523862	m6Acluster.A	0.0602989	0.195385	0.352085	0.237037	0.190204	0.171374	0.00115067	0.240532	-0.0336364	0.323894	0.0215099	0.0635122	0.354827	0.329498	0.202619	0.0453782	-0.312057	0.313462	0.123536	0.172655	0.157426	-0.111315	0.206996
GSM1523863	m6Acluster.B	-0.207284	0.41782	0.464785	0.355441	0.261527	0.233429	-0.0765465	0.317591	-0.104828	0.325067	0.045113	0.044151	0.420653	0.346395	0.220336	0.0873759	-0.234844	0.271944	0.225325	0.153307	0.150349	0.00569534	0.221645
GSM1523864	m6Acluster.B	-0.234956	0.264012	0.240544	0.263292	0.229695	0.275171	-0.162358	0.237122	-0.22466	0.308662	-0.0670585	-0.0368626	0.228617	0.325352	0.130192	0.000744623	-0.213734	0.256431	0.080785	0.0673233	0.0552067	-0.00763689	0.1551
GSM1523865	m6Acluster.C	-0.238355	0.266448	0.270184	0.238196	0.204134	0.25397	-0.170206	0.301292	-0.229655	0.323812	0.0300261	-0.0772618	0.229476	0.299015	0.145594	0.0345121	-0.253431	0.254084	0.103406	0.0727016	0.051781	-0.170112	0.0537156
GSM1523866	m6Acluster.A	0.0526531	0.353875	0.38434	0.309771	0.237666	0.228502	-0.0463604	0.343668	-0.0518976	0.370845	0.0931027	0.156412	0.441568	0.348106	0.190454	0.0965911	-0.246146	0.35126	0.290502	0.212953	0.198999	-0.0570097	0.20856
GSM1523867	m6Acluster.B	-0.102494	0.302913	0.321171	0.293519	0.238701	0.265013	-0.0322487	0.3471	-0.150502	0.342615	0.0277854	0.0461652	0.313059	0.337118	0.125217	-0.00706421	-0.149241	0.291213	0.132654	0.123451	0.0897958	-0.0649044	0.186851
GSM1523868	m6Acluster.B	-0.117358	0.448742	0.429273	0.365851	0.232876	0.246684	0.0232451	0.357727	0.00856691	0.397426	0.149252	0.136395	0.429119	0.39409	0.246412	0.0866552	0.0435927	0.350472	0.281024	0.191336	0.150692	-0.0223483	0.226474
GSM1523869	m6Acluster.B	-0.106706	0.280116	0.261396	0.307083	0.243291	0.269993	0.0145864	0.301365	-0.104787	0.349445	0.0581958	0.0986522	0.301262	0.350388	0.161774	0.0180394	-0.0735794	0.299547	0.130539	0.142534	0.0982187	-0.0416743	0.127702
GSM1523870	m6Acluster.B	-0.230136	0.369506	0.342482	0.274765	0.218256	0.210126	-0.192804	0.278874	-0.194987	0.322145	-0.0286104	-0.0399797	0.240473	0.31401	0.121714	0.0708743	-0.345446	0.242302	0.117975	0.0677291	0.115668	-0.0780248	0.163901
GSM1523871	m6Acluster.C	-0.155349	0.329204	0.308839	0.283991	0.235692	0.248797	-0.0669388	0.327024	-0.156745	0.338145	-0.000759157	0.049548	0.276535	0.333264	0.138466	0.0470893	-0.267407	0.273428	0.150628	0.124767	0.0917271	-0.0857385	0.16432
GSM1523872	m6Acluster.B	-0.0112553	0.283262	0.351384	0.353728	0.22327	0.283402	-0.0355811	0.340187	-0.0816702	0.393167	0.16844	0.0989013	0.439733	0.354331	0.218812	0.0956394	-0.142913	0.357993	0.29114	0.213347	0.129068	-0.0272769	0.137518
GSM1523873	m6Acluster.A	0.195593	0.426183	0.47533	0.32388	0.262959	0.288767	-0.0911101	0.324948	0.0667155	0.361873	0.129454	0.0296643	0.493469	0.378091	0.215122	0.0762911	-0.240316	0.285193	0.26511	0.194138	0.136403	-0.0649072	0.177278
GSM1523874	m6Acluster.C	-0.308877	0.294059	0.239587	0.368628	0.198182	0.299003	-0.159642	0.35755	-0.192309	0.308961	0.0507383	0.0669169	0.304439	0.352193	0.176889	0.0385703	-0.118166	0.3202	0.233864	0.185339	0.109214	-0.0688575	0.10036
GSM1523875	m6Acluster.B	-0.352643	0.272804	0.181076	0.175661	0.237159	0.235248	-0.212361	0.194704	-0.346332	0.257363	-0.0575001	-0.0569863	0.190799	0.360525	0.063077	-0.0100381	-0.31395	0.269228	0.00506094	0.0480355	0.0198667	-0.121377	0.141502
GSM1523876	m6Acluster.B	-0.19212	0.295807	0.316121	0.340812	0.219516	0.251742	-0.115221	0.302532	-0.179722	0.324634	0.00253743	-0.0210358	0.278625	0.343905	0.132112	0.0188426	-0.223401	0.232711	0.117782	0.0796166	0.112583	-0.0304493	0.18947
GSM1523877	m6Acluster.C	-0.400901	0.181543	0.107758	0.201343	0.155986	0.273996	-0.222589	0.194502	-0.309638	0.257799	-0.0748867	-0.0341394	0.154957	0.334559	0.0857572	-0.0695674	-0.25362	0.26916	0.0361653	0.0576407	0.0190675	-0.0689237	0.131358
GSM1523878	m6Acluster.B	-0.00383285	0.358321	0.42754	0.307222	0.253586	0.256213	-0.00616893	0.311681	-0.0698097	0.347407	0.0452065	0.033723	0.393964	0.342927	0.189688	0.0287274	-0.145623	0.286972	0.17722	0.146223	0.105047	-0.0805774	0.169509
GSM1523879	m6Acluster.C	-0.217558	0.258045	0.290485	0.251869	0.247344	0.263632	-0.0739643	0.302965	-0.214576	0.300124	-0.0424722	-0.0548129	0.2283	0.360385	0.12271	-0.0332531	-0.215968	0.324123	0.0941378	0.114505	0.0412739	-0.102539	0.0861832
GSM1523880	m6Acluster.B	0.0158945	0.404994	0.407631	0.308247	0.213915	0.261753	-0.0413837	0.284156	-0.0738227	0.321858	0.00541268	0.00237226	0.340127	0.327516	0.157575	0.0319748	-0.188088	0.268501	0.146765	0.116878	0.116972	-0.0551819	0.20175
GSM1523881	m6Acluster.B	-0.282667	0.205215	0.227768	0.284084	0.196763	0.245048	-0.104433	0.264872	-0.27699	0.297789	-0.0277846	0.046487	0.252862	0.334009	0.171548	0.0229272	-0.202648	0.274672	0.0598962	0.0594824	0.0819983	-0.0588657	0.101412
GSM1523882	m6Acluster.B	-0.240815	0.381072	0.350882	0.292382	0.234049	0.24485	-0.0665111	0.25638	-0.182309	0.318435	-0.0173439	-0.04567	0.35416	0.301213	0.128078	0.0164825	-0.204278	0.237711	0.152641	0.105321	0.0738944	-0.0878836	0.186604
GSM1523883	m6Acluster.C	-0.160282	0.329673	0.387116	0.299428	0.221262	0.243173	-0.0805564	0.285746	-0.169641	0.292662	0.00550222	-0.0566062	0.331336	0.337558	0.144674	0.0278149	-0.199058	0.263357	0.142664	0.108246	0.0748011	-0.0139627	0.153727
GSM1523884	m6Acluster.B	-0.0125658	0.299384	0.272233	0.295608	0.234162	0.24042	0.0738373	0.329739	-0.104917	0.360192	0.0850493	0.168152	0.372818	0.366962	0.174934	0.0532219	-0.121276	0.292905	0.176735	0.156564	0.142115	-0.064596	0.169858
GSM1523885	m6Acluster.B	-0.263167	0.396143	0.414891	0.349793	0.242285	0.243129	-0.0543362	0.288113	-0.0832214	0.354815	0.0378552	0.0474936	0.363191	0.338548	0.1677	0.0634108	-0.0965841	0.249665	0.138335	0.119431	0.139843	-0.0119365	0.189953
GSM1523886	m6Acluster.A	-0.065203	0.342911	0.376502	0.378582	0.246705	0.238056	0.0464585	0.340604	-0.0652485	0.389987	0.16014	0.262214	0.45494	0.346708	0.231824	0.108804	-0.0161756	0.393585	0.313044	0.216597	0.210759	-0.0460372	0.213482
GSM1523887	m6Acluster.A	-0.105295	0.382462	0.384134	0.360774	0.214316	0.290518	-0.107266	0.283616	-0.153221	0.326175	0.0735154	0.0535752	0.404018	0.33292	0.196814	0.116456	-0.145505	0.279722	0.226038	0.188603	0.132676	0.0096945	0.0821599
GSM1523888	m6Acluster.B	-0.0739406	0.455085	0.482134	0.338995	0.241425	0.261589	-0.0395591	0.318058	-0.0580535	0.338031	0.09765	-0.00844875	0.44924	0.341908	0.231042	0.0900146	-0.296396	0.279488	0.220203	0.171919	0.170275	-0.0389735	0.200429
GSM1523889	m6Acluster.B	-0.261709	0.201749	0.238894	0.231744	0.266759	0.218625	-0.195414	0.217999	-0.294872	0.317662	-0.0593796	-0.0356288	0.163033	0.335603	0.0931118	-0.0244474	-0.232423	0.173471	0.0050814	0.0323725	0.0476703	-0.0751539	0.172054
GSM1523890	m6Acluster.A	-0.0378997	0.229826	0.285714	0.302564	0.240924	0.251208	0.00180024	0.306698	-0.143725	0.370093	0.0575166	0.0504926	0.346913	0.348833	0.152485	-0.000931365	-0.245254	0.273226	0.109309	0.124866	0.0594993	-0.0754616	0.134531
GSM1523891	m6Acluster.A	-0.229836	0.306865	0.223649	0.376626	0.259466	0.262526	7.18e-05	0.411513	-0.129262	0.403902	0.22172	0.251749	0.432892	0.354258	0.214351	0.133368	0.0885857	0.378611	0.321408	0.217744	0.119597	-0.103501	0.132713
GSM1523892	m6Acluster.A	0.0283735	0.362657	0.357597	0.306882	0.235066	0.296928	-0.0284552	0.332003	-0.0933723	0.367106	0.0358344	0.0748547	0.352924	0.336726	0.199559	0.078537	-0.200944	0.268961	0.229774	0.176747	0.124902	-0.0021402	0.125392
GSM1523893	m6Acluster.C	-0.250494	0.215415	0.270091	0.242441	0.228303	0.24117	-0.0676876	0.253153	-0.242448	0.30099	-0.0536743	-0.0330757	0.207625	0.317422	0.119933	-0.00409678	-0.246313	0.260212	0.109594	0.0835382	0.0528074	-0.0984256	0.0993979
GSM1523894	m6Acluster.C	-0.28051	0.233406	0.206365	0.264785	0.178867	0.25986	-0.207	0.291972	-0.269722	0.290776	-0.025839	-0.00261472	0.172718	0.32161	0.146374	0.0298721	-0.126804	0.225481	0.0550053	0.0704791	0.0414717	-0.0301556	0.146813
GSM1523895	m6Acluster.C	-0.312769	0.325961	0.282712	0.263402	0.186283	0.262981	-0.168411	0.276862	-0.251405	0.275834	0.00072807	-0.00959821	0.218141	0.354381	0.0904465	0.0451829	-0.217751	0.23403	0.101871	0.10639	0.031583	-0.106091	0.161448
GSM1523896	m6Acluster.B	0.0217327	0.32548	0.422573	0.315033	0.237234	0.259346	-0.10909	0.361174	-0.0420263	0.319565	0.0614259	0.0197184	0.414107	0.35712	0.192148	0.0682028	-0.238679	0.331408	0.227194	0.171756	0.119577	-0.125235	0.154108
GSM1523897	m6Acluster.C	-0.308699	0.290418	0.180677	0.221955	0.171986	0.257609	-0.236416	0.221965	-0.255682	0.31859	-0.121826	-0.0706506	0.143701	0.346784	0.0958368	0.0532752	-0.28148	0.320193	0.00501634	0.0587258	0.035099	-0.0936838	0.191007
GSM1523898	m6Acluster.C	-0.297483	0.220255	0.27254	0.259253	0.244577	0.232898	-0.0316685	0.32349	-0.259563	0.29716	-0.0195371	0.00885577	0.21614	0.310001	0.0975847	-0.0293941	-0.193245	0.244983	0.121834	0.0601389	0.0471213	-0.055869	0.0301559
GSM1523899	m6Acluster.A	-0.225179	0.23934	0.366191	0.261978	0.254588	0.30042	-0.110881	0.275236	-0.244236	0.251032	-0.0156067	0.0239376	0.214059	0.346254	0.119695	0.0445233	-0.373728	0.279369	0.00257615	0.0868488	0.0656748	0.0196685	0.126436
GSM1523901	m6Acluster.B	-0.256378	0.379789	0.389302	0.331423	0.223233	0.256223	-0.123444	0.344648	-0.17591	0.353164	0.0795878	0.0350879	0.350996	0.31738	0.181506	0.0895289	-0.229231	0.252166	0.195711	0.151211	0.136245	-0.0230651	0.181826
GSM1523903	m6Acluster.B	-0.367363	0.226258	0.234525	0.256742	0.232247	0.235792	-0.200225	0.224947	-0.279018	0.33764	-0.0328387	-0.0297293	0.184382	0.29473	0.092262	0.0380733	-0.340622	0.249755	0.044333	0.0653723	0.0671188	-0.0839412	0.18085
GSM1523904	m6Acluster.A	-0.107635	0.306806	0.340075	0.269906	0.248876	0.271976	-0.0130192	0.314631	-0.141828	0.386468	0.0595325	0.128758	0.342151	0.312621	0.142012	0.0493596	-0.235367	0.256362	0.174024	0.146881	0.0944367	-0.035148	0.155047
GSM1523905	m6Acluster.B	-0.204108	0.250386	0.224735	0.275355	0.196527	0.234227	-0.0683369	0.276782	-0.170779	0.331258	0.056608	-0.0221309	0.292962	0.32797	0.142144	0.031876	-0.149497	0.280227	0.102959	0.115318	0.0955976	-0.0560725	0.168398
GSM1523906	m6Acluster.B	0.288721	0.466951	0.488461	0.312887	0.254985	0.251591	0.0250348	0.321934	0.149187	0.352054	0.0959919	0.150252	0.471019	0.38289	0.226038	0.0926014	-0.238641	0.342755	0.263812	0.21938	0.179646	-0.0812466	0.186149
GSM1523908	m6Acluster.C	-0.134442	0.390529	0.374793	0.346224	0.217661	0.25752	-0.0891	0.331019	-0.0611327	0.373538	0.113002	0.0821311	0.404252	0.335056	0.183954	0.158066	-0.150392	0.332104	0.25374	0.178336	0.125853	-0.0371187	0.16753
GSM1523909	m6Acluster.B	-0.165837	0.441397	0.46338	0.340687	0.202557	0.26577	-0.0897474	0.345245	-0.107635	0.359844	0.124126	0.0442365	0.362518	0.343772	0.207812	0.0928679	-0.250294	0.27385	0.215227	0.123134	0.163436	-0.0293142	0.135695
GSM1523910	m6Acluster.B	-0.157574	0.384532	0.425248	0.319345	0.170304	0.251931	-0.169681	0.291962	-0.134749	0.343985	0.00680314	0.0465278	0.316887	0.331534	0.151987	0.0584306	-0.209783	0.257961	0.171236	0.0953998	0.117098	-0.0452917	0.15463
GSM1523911	m6Acluster.C	-0.323963	0.27971	0.262596	0.295868	0.234976	0.260489	-0.191247	0.316552	-0.226277	0.337378	-0.00148003	0.0120488	0.216301	0.337386	0.151967	0.0510173	-0.192365	0.277936	0.120196	0.082456	0.0817184	-0.0589216	0.0803522
GSM1523918	m6Acluster.A	-0.184946	0.140176	0.224755	0.249745	0.204634	0.238608	-0.160217	0.239345	-0.23359	0.333128	0.0139712	0.0405764	0.286906	0.290035	0.169719	0.0772946	-0.361248	0.305313	0.135384	0.121097	0.105878	-0.135895	0.163463
GSM1523919	m6Acluster.A	0.0559267	0.231346	0.333361	0.26764	0.253558	0.268917	-0.108831	0.330655	-0.108561	0.340912	0.0518267	0.0643006	0.287353	0.342611	0.129244	0.0217968	-0.185229	0.307285	0.123651	0.15542	0.117396	-0.0418318	0.106514
GSM1523920	m6Acluster.A	-0.0465321	0.11143	0.320962	0.276092	0.254502	0.233473	0.026093	0.3114	-0.105748	0.396724	0.0545683	-0.00743919	0.360632	0.361001	0.149469	0.00781804	-0.245602	0.315062	0.201163	0.14989	0.0888556	-0.0638807	0.097242
GSM1523921	m6Acluster.B	-0.181959	0.309518	0.337708	0.315056	0.22365	0.25246	-0.136128	0.29231	-0.188866	0.341183	0.0394596	-0.0399156	0.319023	0.331612	0.173059	0.0501701	-0.156635	0.308749	0.186136	0.133492	0.118103	-0.0928839	0.155945
GSM1523922	m6Acluster.C	-0.351333	0.285963	0.223722	0.333927	0.225408	0.27003	0.017902	0.285513	-0.174235	0.361529	0.106812	0.0859933	0.345751	0.352692	0.160862	0.03456	-0.0390613	0.365931	0.18387	0.159116	0.11074	-0.0744009	0.127811
GSM1523923	m6Acluster.C	-0.141106	0.273483	0.272824	0.289795	0.215013	0.252154	-0.0287283	0.337519	-0.199151	0.33314	0.0171927	0.0430992	0.260951	0.339466	0.11227	0.0327767	-0.114546	0.271742	0.135224	0.144654	0.0660975	-0.0484508	0.117845
GSM1523924	m6Acluster.A	-0.0704539	0.204985	0.364038	0.259511	0.26075	0.24076	-0.0382147	0.298505	-0.134553	0.353706	0.0251875	-0.0161646	0.28686	0.341388	0.138869	0.0217544	-0.290838	0.323239	0.130311	0.134266	0.093147	-0.0920375	0.163826
GSM1523925	m6Acluster.C	-0.139256	0.284396	0.254056	0.236348	0.238091	0.262286	-0.125879	0.300727	-0.231122	0.427766	-0.059704	0.0268095	0.251997	0.389931	0.13273	0.0288891	-0.243545	0.295652	0.094752	0.117452	0.0509541	-0.12831	0.0899052
GSM1523926	m6Acluster.C	-0.197965	0.189363	0.154428	0.275516	0.236184	0.258608	-0.102257	0.268534	-0.271881	0.252264	-0.0226059	-0.0874491	0.0985935	0.320726	0.0937242	0.0208176	-0.294676	0.22588	-0.0259192	0.00955522	0.00620436	-0.0428522	0.113405
GSM1523927	m6Acluster.B	-0.110086	0.17478	0.219264	0.273463	0.217119	0.24416	-0.0119305	0.334927	-0.158999	0.336074	0.0532764	0.108325	0.282834	0.360536	0.108289	0.0167961	-0.173535	0.289396	0.157633	0.153275	0.107502	-0.0542872	0.135751
GSM1523928	m6Acluster.C	-0.35008	0.22124	0.133095	0.271116	0.176607	0.307437	-0.13097	0.238075	-0.265539	0.326734	-0.020872	-0.0443509	0.261094	0.364343	0.129157	0.081924	-0.198984	0.282385	0.14975	0.122533	0.0826068	-0.110867	0.0860334
GSM1523929	m6Acluster.B	-0.0476268	0.347468	0.341436	0.322848	0.215403	0.287768	-0.135779	0.339829	-0.115742	0.354321	0.0196962	0.0147611	0.367571	0.35297	0.173991	0.0659016	-0.142662	0.285652	0.154202	0.140656	0.120748	-0.0528258	0.144141
GSM1523930	m6Acluster.A	-0.232544	0.19008	0.200467	0.282338	0.212737	0.302816	-0.045422	0.313177	-0.225533	0.304546	-0.032225	0.0485117	0.259046	0.404511	0.196127	0.0758961	-0.203399	0.318199	0.0418273	0.119452	0.0867035	-0.0441166	0.089311
GSM1523931	m6Acluster.A	0.23848	0.39832	0.495689	0.338279	0.277364	0.292564	-0.0198596	0.3301	0.0662574	0.377592	0.114538	0.0120945	0.485222	0.377879	0.202459	0.0715291	-0.242418	0.343175	0.226456	0.19386	0.16847	-0.0398765	0.144646
GSM1523932	m6Acluster.C	-0.183009	0.235233	0.213258	0.264719	0.19764	0.274459	-0.0903171	0.316935	-0.18606	0.289414	-0.0339069	-0.0218818	0.179018	0.339194	0.111838	-0.0347994	-0.256762	0.267183	0.0654603	0.0820712	0.0332606	-0.0908294	0.0335194
GSM1523933	m6Acluster.C	-0.169519	0.34106	0.290606	0.318361	0.236621	0.262223	-0.162093	0.303166	-0.183223	0.386315	0.0793781	0.131751	0.336702	0.339376	0.184131	0.091454	-0.0922802	0.292235	0.166031	0.170637	0.0897639	-0.044023	0.131565
GSM1523934	m6Acluster.A	-0.206912	0.185277	0.142404	0.260693	0.194046	0.298493	-0.208359	0.236323	-0.244255	0.323241	-0.0816374	-0.0739159	0.156154	0.338631	0.137974	0.0330311	-0.251703	0.317401	0.0456058	0.093975	0.0569516	-0.126464	0.105778
GSM1523935	m6Acluster.A	-0.116205	0.251614	0.245051	0.363135	0.249609	0.280578	0.101671	0.378118	-0.10051	0.388365	0.192429	0.239605	0.448846	0.36084	0.232559	0.124856	0.0715136	0.443274	0.339903	0.224216	0.201698	-0.111319	0.163142
GSM1523936	m6Acluster.A	-0.0311505	0.194619	0.303143	0.304227	0.248999	0.251979	-0.0136765	0.314303	-0.125249	0.386016	0.0910986	0.0478205	0.366164	0.340806	0.165506	0.0521084	-0.189041	0.312011	0.182437	0.169049	0.133029	-0.0544539	0.163243
GSM1523937	m6Acluster.A	-0.126173	0.275967	0.308377	0.371207	0.229268	0.263106	-0.0141092	0.327621	-0.104277	0.400492	0.0775977	0.0700641	0.431399	0.37187	0.179852	0.0556658	0.121708	0.340098	0.22564	0.162052	0.102696	-0.0571835	0.0915302
GSM1523938	m6Acluster.A	-0.169525	0.156686	0.27943	0.252535	0.230188	0.226855	0.02427	0.242835	-0.163701	0.312874	0.0391352	0.104688	0.265585	0.329446	0.167683	0.0772256	-0.349277	0.313532	0.116637	0.181042	0.138755	-0.0660303	0.16559
GSM1523939	m6Acluster.A	0.0835395	0.0751705	0.304246	0.243486	0.220774	0.229417	-0.0226175	0.276968	-0.0977684	0.325055	0.0548757	0.180291	0.349846	0.32474	0.215333	0.0321433	-0.285812	0.366563	0.180568	0.178883	0.156565	-0.125464	0.123654
GSM1523940	m6Acluster.B	-0.221556	0.21666	0.178914	0.212295	0.221311	0.271854	-0.173172	0.259162	-0.272898	0.309404	-0.0130431	-0.0881563	0.131484	0.298595	0.119353	-0.00430858	-0.305256	0.263771	0.0140496	0.0779397	0.0562303	-0.104231	0.110141
GSM1523941	m6Acluster.B	-0.0481171	0.36802	0.491944	0.303762	0.233884	0.273542	-0.0496373	0.341159	-0.0957125	0.343235	0.0175033	0.00826104	0.379482	0.375174	0.185135	0.069455	-0.264707	0.296578	0.208728	0.153668	0.147711	-0.0768917	0.167109
GSM1523942	m6Acluster.A	-0.220184	0.250203	0.196353	0.279798	0.223082	0.297291	-0.134168	0.307327	-0.226843	0.352284	-0.00822707	0.0387299	0.234098	0.341571	0.143186	0.0552949	-0.161984	0.285937	0.0741789	0.0981858	0.0945271	-0.0902044	0.147987
GSM1523943	m6Acluster.B	-0.269658	0.288008	0.296125	0.298271	0.200596	0.230156	-0.0398631	0.30961	-0.179087	0.361538	0.0230759	0.0391166	0.27673	0.351958	0.154872	0.0478351	-0.126669	0.267357	0.0956524	0.103389	0.0610367	-0.0544167	0.134487
GSM1523944	m6Acluster.B	0.149092	0.380474	0.45317	0.355356	0.296881	0.242936	-0.0923418	0.315999	-0.00321315	0.368746	0.0715253	0.0431732	0.424873	0.389405	0.169949	0.0905703	-0.201287	0.31471	0.264586	0.165593	0.133662	-0.00635741	0.129729
GSM1523945	m6Acluster.A	-0.275122	0.273941	0.249431	0.341989	0.262825	0.264005	0.0140482	0.347689	-0.187005	0.393118	0.183363	0.187161	0.448013	0.346565	0.213141	0.0926355	-0.122621	0.371375	0.318115	0.1826	0.120906	-0.0472931	0.124926
GSM1523946	m6Acluster.C	-0.252743	0.294697	0.286967	0.321483	0.21346	0.274205	-0.0607355	0.35534	-0.18864	0.362159	0.100297	0.0469932	0.319582	0.361423	0.176723	0.0328858	0.0643137	0.324729	0.141861	0.160797	0.0784372	-0.09084	0.191877
GSM1523947	m6Acluster.B	-0.19028	0.396312	0.351151	0.299141	0.194912	0.226762	-0.0710656	0.296341	-0.189104	0.289311	-0.0386165	0.01391	0.271301	0.334847	0.135928	0.0650378	-0.273332	0.232859	0.113508	0.0753206	0.0857806	-0.0387776	0.116768
GSM1523948	m6Acluster.A	-0.218084	0.146727	0.286256	0.277404	0.255033	0.273644	-0.024485	0.279845	-0.21464	0.350032	0.0314206	0.163029	0.333754	0.351036	0.157344	0.035378	-0.127636	0.347706	0.153227	0.130432	0.0999107	-0.0596584	0.132457
GSM1523949	m6Acluster.A	-0.0344563	0.162958	0.343106	0.24483	0.225673	0.231155	0.0604638	0.23895	-0.11676	0.318371	0.00950304	0.134651	0.367551	0.349719	0.201078	0.0383598	-0.234768	0.300524	0.104808	0.166568	0.157281	-0.0754468	0.125504
GSM1523950	m6Acluster.C	-0.347507	0.26179	0.204253	0.23311	0.186856	0.206288	-0.232807	0.27154	-0.27847	0.237332	-0.0834344	-0.134357	0.111598	0.303777	0.0572244	0.0100357	-0.272954	0.222763	-0.0369049	0.0229054	-0.00561774	-0.0893398	0.0779573
GSM1523951	m6Acluster.A	0.211065	0.37678	0.457116	0.316874	0.249199	0.265257	-0.05988	0.296986	0.0898163	0.349183	0.0834973	-0.00499865	0.506728	0.371693	0.21886	0.0887504	-0.252774	0.350148	0.240334	0.18767	0.159673	-0.0682235	0.140941
GSM1523952	m6Acluster.A	0.00128505	0.343572	0.37147	0.318731	0.247226	0.25771	-0.0596082	0.316663	-0.103409	0.38607	0.060544	0.115308	0.38533	0.346313	0.134659	0.0558707	-0.103819	0.349226	0.16683	0.134774	0.137024	-0.0606236	0.221426
GSM1523953	m6Acluster.C	-0.275364	0.18565	0.133455	0.115123	0.215902	0.275431	-0.17591	0.173495	-0.317038	0.308601	-0.103086	0.00979053	-0.00532209	0.273513	0.0183925	-0.0606635	-0.34017	0.260444	-0.053859	0.0274456	-0.0225866	-0.146004	0.0910635
GSM1523954	m6Acluster.A	-0.215139	-0.0496146	0.162273	0.164668	0.222316	0.265273	-0.18665	0.235808	-0.257726	0.288534	-0.0732104	-0.146321	0.00412238	0.362009	0.0865787	-0.0546041	-0.240041	0.239337	-0.0610624	0.0446507	0.0414998	-0.0723546	0.047163
GSM1523955	m6Acluster.A	0.0170457	0.0835836	0.334044	0.19965	0.235949	0.243693	0.00178606	0.217619	-0.174047	0.298173	-0.0663589	0.0109057	0.216948	0.348265	0.109166	-0.039388	-0.334789	0.318222	-0.0241562	0.0784478	0.0883211	-0.0109252	0.104362
GSM1523956	m6Acluster.C	-0.290365	0.293796	0.191246	0.250356	0.227591	0.274426	-0.212677	0.253924	-0.283447	0.279036	-0.0223396	0.00705127	0.188813	0.320283	0.0677349	0.029773	-0.192104	0.301676	0.0734035	0.0577701	0.0421278	-0.0145808	0.189049
GSM1523957	m6Acluster.C	-0.25196	0.175792	0.0790405	0.16569	0.239292	0.288127	-0.135139	0.215707	-0.332095	0.316622	-0.0965782	-0.0103947	0.0430259	0.336666	0.0810634	-0.0136136	-0.31916	0.213045	-0.149016	0.0371446	0.0305339	-0.103057	0.121405
GSM1523958	m6Acluster.A	0.0760535	0.330983	0.430689	0.327919	0.266572	0.249332	-0.0105363	0.364438	-0.0125812	0.401012	0.0629805	0.093798	0.427095	0.355629	0.189611	0.0488127	-0.142575	0.325262	0.212641	0.185197	0.155436	-0.0637905	0.208304
GSM1523959	m6Acluster.C	-0.305546	0.251973	0.139317	0.197165	0.22704	0.282554	-0.0544482	0.255936	-0.311136	0.308869	-0.0362255	0.000772862	0.134405	0.290102	0.0774682	-0.00712341	-0.128133	0.249653	-0.0167224	0.0543787	0.0273771	-0.0945787	0.0921522
GSM1523960	m6Acluster.C	-0.382352	0.151209	0.0837561	0.185327	0.18988	0.265637	-0.142435	0.257645	-0.314705	0.296587	-0.0752121	-0.0704512	0.0401792	0.304528	0.0982146	0.00910123	-0.239962	0.292242	-0.072655	0.0756499	0.0395595	-0.179488	0.101792
GSM1523961	m6Acluster.C	-0.258961	0.258826	0.181048	0.221674	0.174819	0.276398	-0.262216	0.246633	-0.254761	0.282392	-0.0646285	-0.103042	0.115006	0.330984	0.101244	0.0334256	-0.272515	0.300924	-0.0576133	0.0502597	0.0600118	-0.114799	0.139331
GSM1523962	m6Acluster.A	0.112744	0.17552	0.26767	0.242761	0.198979	0.235823	-0.00484935	0.286517	-0.0337626	0.339819	0.0439577	0.0962911	0.333001	0.357466	0.180569	0.0228971	-0.189375	0.326348	0.159224	0.170824	0.13711	-0.0622698	0.129263
GSM1523963	m6Acluster.A	-0.215357	0.189327	0.280861	0.288234	0.242518	0.252497	-0.122843	0.291976	-0.21584	0.39047	0.00643906	-0.0312028	0.277685	0.324185	0.116849	0.00464959	-0.237042	0.276626	0.0897216	0.0986297	0.0656717	-0.059973	0.113249
GSM1523964	m6Acluster.B	-0.25747	0.243197	0.257382	0.225659	0.193969	0.235445	-0.263654	0.218312	-0.245503	0.274471	-0.0685451	-0.146506	0.127799	0.326885	0.11179	-0.00180879	-0.347281	0.245533	-0.0279169	0.0465211	0.0723329	-0.0614782	0.157049
GSM1523965	m6Acluster.A	-0.172739	0.394483	0.299774	0.355833	0.261951	0.27774	0.0439308	0.359747	-0.112565	0.401599	0.181046	0.365539	0.434401	0.367274	0.208832	0.121527	0.0389423	0.405794	0.311146	0.221375	0.174306	-0.0193363	0.23438
GSM1523966	m6Acluster.C	0.069068	0.319279	0.314184	0.251045	0.219262	0.259016	0.00453412	0.287862	-0.104099	0.31211	-0.0139924	0.0378956	0.260595	0.349214	0.0976765	0.0111978	-0.332805	0.291812	0.123141	0.128051	0.0925288	-0.114178	0.157121
GSM1523967	m6Acluster.A	0.129004	0.318072	0.365189	0.277353	0.222459	0.233659	0.0671872	0.27502	-0.0192229	0.357367	-0.0187007	0.0208033	0.357352	0.347402	0.16738	-0.0121932	-0.218653	0.32311	0.145354	0.124309	0.10159	-0.0641259	0.183836
GSM1523968	m6Acluster.A	-0.255765	0.0186079	0.233412	0.198067	0.186726	0.203811	-0.0109817	0.220839	-0.209001	0.355225	-0.000321942	0.100886	0.265285	0.309642	0.166265	0.013075	-0.359042	0.336199	0.0882698	0.159344	0.128931	-0.153162	0.112587
GSM1523969	m6Acluster.A	-0.0241851	0.0850625	0.268394	0.195055	0.205033	0.231423	-0.0567888	0.263708	-0.153209	0.330481	-0.0435475	-0.0637044	0.212443	0.340736	0.116568	-0.0403101	-0.259877	0.299764	0.0326263	0.107853	0.105267	-0.102012	0.103182
GSM1523970	m6Acluster.C	-0.315514	0.178195	0.0795218	0.184138	0.251301	0.271432	-0.228717	0.217315	-0.31384	0.271191	-0.119596	0.00534669	-0.00587622	0.330994	0.0674888	-0.00286181	-0.293314	0.255759	-0.0217231	0.0299212	0.0193682	-0.0140317	0.0601132
GSM1523971	m6Acluster.A	0.261621	0.137694	0.324174	0.267022	0.216491	0.250237	0.0361654	0.213834	-0.0155806	0.345278	-0.00314298	0.14462	0.317041	0.353138	0.196337	0.0244359	-0.304836	0.332805	0.137481	0.174837	0.13896	-0.0827774	0.0449697
GSM1523972	m6Acluster.C	-0.284937	0.164527	0.164973	0.284113	0.231447	0.305519	-0.186033	0.260132	-0.207147	0.354667	0.0305256	-0.0419763	0.284329	0.41753	0.145437	0.0797171	-0.332193	0.344453	0.0946295	0.132555	0.0322953	-0.117038	-0.00325872
GSM1523973	m6Acluster.B	-0.253423	0.229089	0.228198	0.278362	0.254808	0.243108	0.00348479	0.265377	-0.233059	0.36191	-0.00154517	0.14118	0.279283	0.332113	0.148358	0.0528768	-0.187214	0.306247	0.0973852	0.111971	0.079164	-0.0878904	0.168328
GSM1523974	m6Acluster.C	-0.357334	0.171069	0.120726	0.184476	0.270227	0.248533	-0.181292	0.234446	-0.347599	0.312486	-0.0588978	-0.148553	0.170203	0.310135	0.0701456	-0.00847846	-0.154428	0.26067	-0.0624277	0.0349468	0.0494136	-0.122913	0.132507
GSM1523975	m6Acluster.A	0.166149	0.386458	0.527522	0.30172	0.218107	0.250038	-0.0680544	0.309659	0.0736826	0.342219	0.0599673	-0.0324572	0.43946	0.386562	0.211357	0.0929494	-0.343514	0.331892	0.235938	0.225518	0.165257	-0.10606	0.174381
GSM1523976	m6Acluster.C	-0.159293	0.198256	0.200402	0.268583	0.213582	0.277344	-0.149645	0.239037	-0.241928	0.311451	-0.0598154	-0.035479	0.149893	0.320899	0.116489	-0.00883314	-0.267971	0.269198	0.0301656	0.0944177	0.070418	-0.0439329	0.150582
GSM1523977	m6Acluster.C	-0.298375	0.180877	0.0934053	0.223004	0.18891	0.279221	-0.194203	0.281714	-0.301711	0.344347	-0.0564915	-0.110939	0.13178	0.398756	0.125632	0.00964061	-0.306223	0.240814	0.0151188	0.0520639	-0.0143032	-0.131548	0.0707339
GSM1523978	m6Acluster.C	-0.28581	0.255221	0.29577	0.334837	0.244406	0.29691	0.0272105	0.309409	-0.190537	0.321241	0.00254086	0.0896133	0.304672	0.367399	0.126368	0.00833141	-0.12923	0.335856	0.131448	0.141858	0.0678938	-0.0140723	0.0962336
GSM1523979	m6Acluster.B	-0.241112	0.402273	0.393036	0.284785	0.27569	0.23276	-0.152999	0.297878	-0.201893	0.302312	0.00784409	0.0128196	0.319217	0.310509	0.136028	0.0685818	-0.287786	0.254534	0.136939	0.106233	0.117375	-0.0453939	0.206025
GSM1523980	m6Acluster.A	0.309602	0.351872	0.434884	0.324575	0.252062	0.266235	0.0856402	0.325545	0.167626	0.409999	0.122017	0.081444	0.444151	0.381241	0.169359	0.0645902	-0.134034	0.339967	0.212282	0.188828	0.17809	-0.0556338	0.196451
GSM1523981	m6Acluster.A	-0.157516	0.299311	0.332318	0.347303	0.222236	0.256076	0.0368593	0.393767	-0.0718768	0.400081	0.196461	0.234905	0.482959	0.375709	0.242501	0.140271	0.00266051	0.410703	0.361442	0.249518	0.181851	-0.109332	0.179889
GSM1523982	m6Acluster.A	-0.12707	0.242297	0.34935	0.41796	0.229904	0.277018	0.0186526	0.416039	-0.0851432	0.412122	0.288648	0.31107	0.551803	0.394388	0.242864	0.164607	0.141044	0.430279	0.470326	0.283161	0.220308	-0.0863767	0.132735
GSM1523983	m6Acluster.B	-0.225076	0.343201	0.301956	0.299821	0.199348	0.207881	-0.0670375	0.274706	-0.163666	0.324605	-0.00281385	0.0357025	0.304446	0.322743	0.138665	0.0282981	-0.199583	0.26382	0.141307	0.0385299	0.102491	-0.0935182	0.0996421
GSM1523984	m6Acluster.B	-0.315714	0.234164	0.199019	0.149556	0.158737	0.223916	-0.17092	0.214429	-0.337645	0.286761	-0.0859774	-0.0793753	0.127337	0.28824	0.0188019	-0.0600126	-0.380476	0.229809	0.048834	0.0774058	0.0284896	-0.221073	0.220623
GSM1523985	m6Acluster.A	-0.0333838	0.340911	0.388747	0.291305	0.239928	0.292955	-0.032629	0.308376	-0.16084	0.374442	0.0425143	0.0489342	0.370084	0.346871	0.176209	0.0377841	-0.154231	0.297507	0.125133	0.146995	0.140129	-0.0508186	0.205257
GSM1523986	m6Acluster.A	0.0981705	0.250347	0.43772	0.313871	0.256505	0.27245	-0.0271973	0.376491	-0.0108338	0.373885	0.0814845	0.104909	0.449987	0.405794	0.220936	0.0480301	-0.196727	0.328861	0.243294	0.211547	0.156945	-0.0723253	0.163205
GSM1523987	m6Acluster.A	0.173586	0.2946	0.387675	0.253312	0.209998	0.259469	0.0311236	0.25868	-0.00332074	0.352553	-0.042083	-0.036019	0.324524	0.357468	0.125288	-0.0225972	-0.276665	0.302531	0.0803237	0.146018	0.110146	-0.0920754	0.128015
GSM1523988	m6Acluster.A	-0.0890786	0.13412	0.366744	0.224339	0.191133	0.19109	-0.115433	0.217484	-0.111735	0.359844	0.000862868	-0.0457252	0.270202	0.310039	0.168707	0.0617899	-0.312197	0.349175	0.169876	0.138706	0.149083	-0.179338	0.169486
GSM1523989	m6Acluster.A	-0.0537462	0.257943	0.328979	0.280025	0.218459	0.261645	0.0297873	0.320934	-0.101996	0.374391	0.0711951	0.0835722	0.373133	0.350551	0.15364	0.0603065	-0.273009	0.339567	0.198139	0.179299	0.136895	-0.063577	0.18175
GSM1523990	m6Acluster.C	-0.269653	0.135862	0.147736	0.232326	0.264769	0.277822	-0.20443	0.27103	-0.258592	0.352092	-0.0026665	-0.00761901	0.210826	0.304573	0.141499	0.0374023	-0.40359	0.335234	0.111925	0.126535	0.0501464	-0.125786	0.072285
GSM1523991	m6Acluster.C	-0.25308	0.159473	0.321132	0.234847	0.220158	0.26024	-0.142963	0.242784	-0.297829	0.30575	-0.0057046	0.016587	0.108435	0.325889	0.138652	0.000703617	-0.311753	0.264417	-0.0173031	0.0673981	0.0925537	-0.0340162	0.176693
GSM1523992	m6Acluster.A	-0.250397	0.0903714	0.222921	0.229585	0.210114	0.245874	-0.146513	0.272707	-0.283011	0.305908	-0.052538	-0.133597	0.099398	0.330178	0.100724	-0.029788	-0.270911	0.280952	-0.0276471	0.0761494	0.057151	-0.0637959	0.052698
GSM1523993	m6Acluster.A	0.136605	0.340746	0.389227	0.287635	0.249025	0.225186	-0.0049571	0.284497	-0.00671377	0.37813	0.0262873	0.033173	0.367808	0.35509	0.144794	0.0428904	-0.19478	0.31196	0.196148	0.162359	0.167039	-0.0529278	0.237113
GSM1523994	m6Acluster.A	-0.0559348	0.179154	0.310069	0.269458	0.240971	0.271345	-0.0298855	0.303283	-0.169185	0.341743	-0.00365134	-0.0133107	0.312882	0.345029	0.146248	0.00102318	-0.228768	0.289702	0.108515	0.146875	0.0968827	-0.0671121	0.102092
GSM1523995	m6Acluster.C	-0.320782	0.156309	0.163037	0.220314	0.219905	0.270773	-0.257574	0.227534	-0.27044	0.314718	-0.0200889	-0.0629815	0.13394	0.320362	0.130169	-0.0431747	-0.13947	0.304253	-0.0717874	0.0856708	0.0599267	-0.0985462	0.0605636
GSM1523996	m6Acluster.A	-0.280971	0.140251	0.286586	0.259769	0.221385	0.269418	-0.110216	0.303489	-0.2213	0.360976	-0.003433	0.0132105	0.256268	0.32208	0.135033	0.021847	-0.197377	0.302868	0.119588	0.130396	0.0957857	-0.0965097	0.148642
GSM1523997	m6Acluster.C	-0.198927	0.258747	0.261687	0.233866	0.156219	0.241987	-0.0935509	0.311468	-0.25394	0.320246	0.0180525	0.00988954	0.180936	0.322565	0.120129	0.0164021	-0.189475	0.263734	0.0570044	0.0799551	0.0555853	-0.0775796	0.0095465
GSM1523998	m6Acluster.C	-0.28371	0.160963	0.128678	0.224091	0.215769	0.272144	-0.14962	0.211054	-0.323785	0.297299	-0.085099	-0.063067	0.139339	0.333312	0.120429	-0.0326116	-0.348461	0.285738	0.0232418	0.0573949	0.00545293	-0.0507485	0.069716
GSM1523999	m6Acluster.C	-0.317177	0.119957	0.0963053	0.191583	0.202117	0.312323	-0.243439	0.251276	-0.283726	0.312045	-0.0694833	-0.184311	0.132615	0.314742	0.0929938	0.00640746	-0.161158	0.338143	-0.0268108	0.0507135	0.0373067	-0.0626465	0.0305922
GSM1524000	m6Acluster.B	0.0250457	0.299049	0.350741	0.310526	0.228239	0.251058	-0.0650875	0.318279	-0.0854556	0.376602	0.0890014	0.0144953	0.374818	0.334929	0.128406	0.0818209	-0.188179	0.287632	0.202694	0.155676	0.128324	-0.0650934	0.163571
GSM1524001	m6Acluster.C	-0.0967087	0.228337	0.264464	0.263144	0.172398	0.288598	-0.0886849	0.269628	-0.19402	0.321052	-0.0265648	-0.00784252	0.248713	0.340542	0.120716	0.0258215	-0.255318	0.274405	0.0425118	0.107263	0.0351958	-0.0925671	0.107973
GSM1524002	m6Acluster.B	0.0798113	0.44846	0.470023	0.375788	0.233947	0.276578	0.00250999	0.332126	0.0204912	0.346225	0.0666758	-0.0391537	0.473542	0.375504	0.207991	0.0571106	-0.0745407	0.306377	0.199559	0.163447	0.168206	-0.0234344	0.164353
GSM1524003	m6Acluster.C	-0.20738	0.0691644	0.159616	0.201915	0.22286	0.226434	-0.15332	0.24939	-0.261272	0.271607	-0.0444621	-0.114912	0.0964077	0.352318	0.0684492	-0.0481813	-0.173055	0.298034	-0.00296655	0.0779321	0.0194623	-0.0960772	0.0473264
GSM1524004	m6Acluster.A	-0.0666088	0.270606	0.339551	0.290121	0.253166	0.240555	0.00552067	0.292886	-0.177384	0.349546	0.00884338	0.00581911	0.317057	0.34648	0.163383	0.0192592	-0.186042	0.276177	0.119197	0.115594	0.0749166	-0.0789689	0.163171
GSM1524005	m6Acluster.C	-0.155801	0.26038	0.269611	0.249711	0.191333	0.285632	-0.0881566	0.314359	-0.210399	0.360411	-0.00592689	-0.0509413	0.188241	0.325957	0.122645	0.00952964	-0.270148	0.297813	0.118856	0.102221	0.0429426	-0.115078	0.145892
GSM1524006	m6Acluster.A	-0.0948264	0.0978391	0.35871	0.227718	0.210596	0.195039	0.0166084	0.233596	-0.0791038	0.30786	0.064243	0.186897	0.342549	0.33405	0.199087	0.0566182	-0.359559	0.371856	0.177543	0.200235	0.186308	-0.125341	0.169329
GSM1524007	m6Acluster.C	0.0224796	0.342322	0.332785	0.266004	0.213875	0.262588	0.00567938	0.309417	-0.106264	0.363825	0.0184897	0.0917575	0.28632	0.34775	0.12531	0.0121095	-0.206746	0.304301	0.157098	0.173434	0.0944198	-0.103417	0.139528
GSM1524008	m6Acluster.B	-0.198151	0.339599	0.238724	0.315934	0.206703	0.280123	-0.118427	0.289416	-0.158065	0.339531	0.0420465	0.130387	0.286916	0.357868	0.136512	0.0805361	-0.114442	0.312665	0.113646	0.128662	0.0988114	-0.0503151	0.171366
GSM1524009	m6Acluster.A	-0.0526824	0.226665	0.272914	0.307313	0.248957	0.27196	0.0320403	0.26813	-0.165879	0.368734	0.0499843	0.147742	0.355714	0.354407	0.176171	0.0679426	-0.293695	0.348859	0.136205	0.168269	0.166465	-0.0577869	0.139729
GSM1524010	m6Acluster.A	0.215026	0.175365	0.375333	0.263667	0.223368	0.22652	0.115002	0.285588	0.117942	0.324561	0.0377157	0.141575	0.331277	0.36104	0.175908	0.0260852	-0.195198	0.310321	0.107836	0.194923	0.137017	-0.0822727	0.101585
GSM1524011	m6Acluster.A	-0.298473	0.120941	0.0835093	0.216878	0.198237	0.293872	-0.194902	0.238208	-0.244412	0.34942	-0.0466335	-0.121381	0.0734624	0.32227	0.0763251	-0.00861501	-0.200236	0.280395	-0.0550555	0.03306	0.0396742	-0.0611598	0.123198
GSM1524012	m6Acluster.C	-0.14544	0.279751	0.318573	0.333816	0.243218	0.26408	-0.0859723	0.387175	-0.159595	0.394168	0.0905469	0.0946555	0.387427	0.370809	0.12002	0.0543124	0.0575601	0.290704	0.224046	0.144842	0.113271	-0.0299851	0.209047
GSM1524013	m6Acluster.C	-0.158591	0.281261	0.235428	0.284564	0.215655	0.22787	-0.130198	0.304925	-0.173237	0.354967	-0.0149121	-0.0325344	0.312582	0.3324	0.179943	0.0255281	0.0164841	0.292649	0.129992	0.0770868	0.103965	-0.0748902	0.122823
GSM1524014	m6Acluster.C	-0.299105	0.171569	0.19087	0.188956	0.169211	0.290955	-0.181077	0.199343	-0.259922	0.275094	-0.0903748	-0.154697	0.0466994	0.325179	0.113815	-0.0373665	-0.271594	0.288764	-0.0809054	0.0739369	0.0523676	-0.088979	0.200563
GSM1524015	m6Acluster.A	-0.211498	0.182855	0.195794	0.2002	0.231383	0.279297	-0.164144	0.274519	-0.32709	0.339165	-0.0706528	-0.148475	0.181517	0.357213	0.0433058	-0.0446175	-0.258731	0.289268	0.0181531	0.069611	0.0470444	-0.105176	0.0615465
GSM1524016	m6Acluster.A	0.119881	0.358657	0.378109	0.313722	0.242579	0.266225	0.00835829	0.293175	0.0222794	0.367433	0.0350781	0.0458007	0.395268	0.378562	0.164668	0.0336014	-0.159328	0.335249	0.18019	0.154197	0.122319	-0.0495216	0.156128
GSM1524017	m6Acluster.A	-0.144893	0.288921	0.333516	0.302843	0.241232	0.249746	-0.147384	0.313767	-0.189036	0.337611	0.0326642	-0.0477427	0.294867	0.344969	0.143626	0.0285534	-0.202948	0.267835	0.109869	0.113767	0.0807402	-0.0515698	0.127137
GSM1524018	m6Acluster.B	-0.232176	0.240468	0.253971	0.283407	0.244083	0.276348	-0.149267	0.309826	-0.217825	0.349576	0.0264004	0.0209867	0.275214	0.338755	0.0971041	0.0375445	-0.256809	0.276374	0.109052	0.0978791	0.0742242	-0.0731887	0.111401
GSM1524019	m6Acluster.B	-0.0132103	0.313915	0.338069	0.30211	0.21049	0.258521	0.019956	0.328769	-0.127595	0.353969	0.0657089	0.0888147	0.36471	0.328207	0.153043	0.0317545	-0.1658	0.299204	0.175654	0.16647	0.0877185	-0.0687817	0.195577
GSM1524020	m6Acluster.A	-0.00114226	0.269872	0.290508	0.282571	0.248604	0.281092	-0.0639904	0.279981	-0.110672	0.329881	0.0277681	0.0433282	0.312787	0.344014	0.141175	0.024754	-0.216879	0.274854	0.127692	0.113425	0.0856892	-0.0419481	0.125476
GSM1524021	m6Acluster.A	0.00432698	0.294205	0.303868	0.319872	0.235187	0.251634	-0.076529	0.334137	-0.0936905	0.381991	0.0815739	0.129791	0.35699	0.35183	0.16897	0.0635819	-0.0990418	0.3268	0.17509	0.158015	0.128434	-0.0436435	0.17168
GSM1524022	m6Acluster.A	0.111613	0.324747	0.345456	0.2688	0.229334	0.236794	0.0185231	0.285838	0.0483434	0.329585	0.0282441	0.0994809	0.331123	0.35021	0.178951	0.0968423	-0.338944	0.34483	0.218547	0.194686	0.134696	-0.0956477	0.222744
GSM1524023	m6Acluster.C	-0.210781	0.263783	0.313735	0.264682	0.214668	0.273614	-0.158041	0.272301	-0.2493	0.342019	-0.0119507	-0.0399882	0.259207	0.30627	0.125916	0.0258908	-0.206767	0.302426	0.0618992	0.0934349	0.0605639	-0.0803724	0.1283
GSM1524024	m6Acluster.A	-0.149348	0.174688	0.250442	0.278361	0.230322	0.298019	-0.102167	0.282172	-0.217962	0.34112	-0.0181413	0.0177985	0.231848	0.317926	0.137686	0.00682262	-0.28761	0.311916	0.104036	0.111594	0.100523	-0.0666361	0.181193
GSM1524025	m6Acluster.B	-0.246681	0.358815	0.340385	0.386643	0.209873	0.283052	-0.143693	0.319646	-0.144929	0.338223	0.0787732	0.096606	0.350208	0.32069	0.198396	0.0755297	-0.0453274	0.330122	0.227327	0.168342	0.128654	-0.0609848	0.0782263
GSM1524026	m6Acluster.A	-0.125724	0.130606	0.257953	0.275336	0.217055	0.269353	-0.0279383	0.27457	-0.188137	0.312622	0.0582585	0.0838082	0.345269	0.335779	0.165246	0.0727038	-0.180066	0.342179	0.134777	0.151353	0.124877	-0.0375362	0.0795045
GSM1524027	m6Acluster.C	-0.192975	0.216434	0.181089	0.269684	0.204974	0.28286	-0.0589415	0.251718	-0.224475	0.326842	0.00013135	0.018025	0.287181	0.348993	0.158858	0.0369751	-0.146464	0.29858	0.0840976	0.123243	0.0738633	-0.046547	0.100834
GSM1524028	m6Acluster.C	-0.135749	0.251846	0.296456	0.27016	0.225097	0.265582	-0.0230517	0.270527	-0.225018	0.325257	0.0224132	-0.0292077	0.229487	0.346928	0.108408	-0.0342577	-0.104056	0.314914	0.0727201	0.0704919	0.0677141	-0.0439057	0.177905
GSM1524029	m6Acluster.A	-0.0185856	0.0515378	0.290551	0.218925	0.215569	0.228652	-0.00555347	0.1664	-0.15513	0.290476	-0.0258932	0.0289716	0.26054	0.322537	0.182264	-0.00926591	-0.351104	0.303483	0.0362911	0.152491	0.129895	-0.104056	0.0498356
GSM1524030	m6Acluster.A	0.0893517	0.0515748	0.30263	0.191553	0.200244	0.185439	0.0507485	0.177666	-0.00969052	0.317922	-0.00542978	0.169797	0.272905	0.309786	0.185887	0.00905063	-0.345026	0.325538	0.129911	0.129574	0.145774	-0.159413	0.145114
GSM1524031	m6Acluster.C	-0.331706	0.277755	0.213027	0.267086	0.182277	0.273864	-0.20735	0.290472	-0.277222	0.337567	-0.0445761	0.0268631	0.225213	0.341663	0.147894	0.056407	-0.246615	0.285159	0.123217	0.0997776	0.0819684	-0.0539124	0.110981
GSM1524032	m6Acluster.B	-0.335415	0.324842	0.19803	0.361745	0.19329	0.296173	-0.111095	0.327729	-0.214457	0.35299	0.0673035	0.0889447	0.312592	0.315883	0.181596	0.0837228	-0.0942704	0.320512	0.205791	0.148646	0.130208	-0.0421984	0.160529
GSM1524033	m6Acluster.A	0.154704	0.355459	0.4254	0.300626	0.245531	0.280593	-0.0567106	0.309462	-0.00883569	0.339959	0.0668857	-0.0100559	0.419883	0.367487	0.205359	0.0827658	-0.118093	0.315942	0.139227	0.161651	0.114153	-0.0334799	0.109276
GSM1524034	m6Acluster.A	0.149011	0.211867	0.342944	0.289103	0.284943	0.256044	0.0838962	0.308839	0.027143	0.365461	0.0509651	0.177656	0.39114	0.367269	0.148763	0.0153098	-0.154048	0.302813	0.151519	0.149363	0.120503	-0.0698647	0.119673
GSM1524035	m6Acluster.A	0.0207787	0.239561	0.369869	0.273067	0.231965	0.249629	0.0111285	0.298594	-0.10474	0.327344	0.0796666	0.189306	0.392094	0.364207	0.201528	0.0417066	-0.309185	0.328879	0.175582	0.197546	0.151449	-0.0895588	0.167956
GSM1524036	m6Acluster.C	-0.242783	0.204018	0.17776	0.226628	0.183671	0.255664	-0.229609	0.275032	-0.259581	0.313396	-0.0129969	-0.0759277	0.192269	0.325476	0.129212	0.037347	-0.317397	0.276295	0.0531794	0.143854	0.0407039	-0.117564	0.0661958
GSM1524037	m6Acluster.A	-0.123551	0.173445	0.255715	0.312344	0.220286	0.294917	0.0392238	0.324939	-0.178846	0.350229	0.0694432	0.050214	0.34693	0.339835	0.186304	0.0761009	-0.222862	0.35555	0.210933	0.157203	0.117687	-0.0864159	0.0848425
GSM1524038	m6Acluster.A	-0.171899	0.389849	0.41789	0.435889	0.24831	0.311065	-0.0398604	0.333363	-0.127648	0.40251	0.116708	0.202844	0.455729	0.353197	0.208476	0.11308	-0.0319912	0.368395	0.279369	0.192526	0.170793	0.00243352	0.139241
GSM1524039	m6Acluster.A	-0.186441	0.282085	0.250711	0.388495	0.277942	0.276636	0.0561515	0.389826	-0.10193	0.424042	0.268045	0.418378	0.482282	0.368102	0.222683	0.166671	0.134782	0.39549	0.386582	0.269445	0.221209	-0.0109276	0.183404
GSM1524040	m6Acluster.A	0.0822117	0.393343	0.352187	0.326242	0.255017	0.272335	-0.0240304	0.32266	-0.0157859	0.389168	0.121657	0.178624	0.392782	0.339802	0.142838	0.0358348	-0.0322928	0.294298	0.189026	0.144562	0.130175	-0.0692426	0.200716
GSM1524041	m6Acluster.B	-0.288465	0.387297	0.295726	0.313711	0.22914	0.225122	-0.110359	0.333428	-0.208371	0.281992	0.00885676	0.0675534	0.306553	0.297253	0.165343	0.0935764	-0.254621	0.259897	0.197225	0.115036	0.114302	-0.0872408	0.108847
GSM1524042	m6Acluster.C	0.0263245	0.359025	0.355279	0.365096	0.262327	0.27774	0.0141811	0.303856	-0.0762489	0.425757	0.0586957	0.15468	0.403136	0.353242	0.213443	0.0668086	0.0969781	0.361837	0.188392	0.172693	0.139098	-0.0497128	0.12915
GSM1524043	m6Acluster.B	-0.0625115	0.405663	0.475124	0.342334	0.253556	0.268433	-0.00312346	0.354714	-0.104035	0.350139	0.0670883	0.0389991	0.406902	0.346789	0.202519	0.0775125	-0.157412	0.296887	0.249056	0.169304	0.138981	0.000994315	0.204731
GSM1524044	m6Acluster.C	-0.105114	0.223562	0.293237	0.265232	0.227423	0.243194	-0.056096	0.317906	-0.181259	0.337848	-0.00771229	0.0363638	0.251612	0.350065	0.168701	0.0221386	-0.31577	0.308761	0.128525	0.169194	0.105645	-0.0574268	0.11693
GSM1524045	m6Acluster.C	-0.230707	0.159422	0.188384	0.169118	0.268186	0.276617	-0.126264	0.236277	-0.233044	0.303893	-0.0814963	0.0531721	0.0380496	0.326709	0.0746859	0.00615963	-0.189269	0.324797	-0.0312555	0.105669	0.101566	-0.0682455	0.106447
GSM1524046	m6Acluster.B	0.104704	0.267276	0.29904	0.254385	0.223317	0.270519	0.00139219	0.28204	-0.0536028	0.356656	0.0440835	0.0563961	0.376092	0.359737	0.156262	0.0367084	-0.228313	0.349249	0.145975	0.162423	0.147228	-0.102498	0.171203
GSM1524047	m6Acluster.A	-0.105063	0.139398	0.198866	0.320128	0.223052	0.274774	0.00168402	0.28729	-0.161161	0.346022	0.0267628	0.021291	0.309312	0.36083	0.154647	-0.011828	-0.1439	0.289525	0.0848979	0.148355	0.0671776	-0.062222	0.0954707
GSM1524048	m6Acluster.B	-0.241701	0.298621	0.353441	0.263964	0.138888	0.242384	-0.129603	0.319794	-0.195908	0.382289	0.072472	0.00188962	0.337313	0.332966	0.197682	0.0563762	-0.281353	0.298655	0.217646	0.156872	0.115602	-0.0773322	0.130265
GSM1524049	m6Acluster.A	-0.102171	0.259807	0.297385	0.293423	0.231302	0.284609	-0.131775	0.293968	-0.187428	0.369629	0.0757601	0.0180022	0.284488	0.32062	0.157694	0.0805526	-0.222491	0.287444	0.165196	0.133262	0.137158	-0.00248942	0.12931
GSM1524050	m6Acluster.A	-0.292189	0.0864955	0.178782	0.208185	0.255877	0.350467	-0.176508	0.288963	-0.28454	0.329923	-0.033443	-0.041629	0.11268	0.315868	0.112402	0.011438	-0.244417	0.24296	0.0372519	0.0708805	0.0690262	-0.0725282	0.0504791
GSM1524051	m6Acluster.A	3.04e-05	0.286449	0.392988	0.310789	0.261904	0.255451	-0.0547825	0.323258	-0.0759855	0.380592	0.0594266	0.0275487	0.37617	0.353122	0.159732	0.0228587	-0.110845	0.311155	0.158029	0.180453	0.133054	-0.0128108	0.162759
GSM1524052	m6Acluster.A	-0.302169	0.0512899	0.168414	0.199676	0.224776	0.176206	-0.170048	0.233833	-0.316158	0.33102	-0.0353707	0.0227949	0.208554	0.313857	0.150357	0.00614449	-0.282197	0.302723	0.0539976	0.084858	0.0997307	-0.0595325	0.145997
GSM1524053	m6Acluster.C	-0.159947	0.202017	0.250718	0.284137	0.196134	0.269197	-0.177237	0.276019	-0.167101	0.306033	-0.0153093	-0.0635623	0.270819	0.331456	0.174165	0.0103305	-0.213781	0.268629	0.131612	0.178514	0.060898	-0.0396883	0.117596
GSM1524054	m6Acluster.C	-0.293177	0.300176	0.265009	0.234373	0.215009	0.241336	-0.153619	0.32381	-0.252207	0.294561	-0.0532905	-0.0479898	0.174281	0.301783	0.104628	0.0377698	-0.281875	0.215688	0.109249	0.0881385	0.067184	-0.109798	0.160333
GSM1524055	m6Acluster.A	-0.263303	0.253683	0.179351	0.282026	0.2411	0.307755	-0.0836241	0.357165	-0.218574	0.379481	0.0776248	0.104868	0.272515	0.352104	0.188052	0.0707267	-0.15819	0.347505	0.22527	0.163052	0.116074	-0.0803601	0.121189
GSM1524056	m6Acluster.C	-0.186164	0.226421	0.244485	0.323465	0.218724	0.271506	-0.110165	0.293975	-0.202239	0.312425	-0.0217656	0.0311451	0.296886	0.389788	0.140448	0.0508909	-0.138283	0.310181	0.174979	0.147503	0.0924123	-0.103483	0.0150104
GSM1524057	m6Acluster.A	-0.242871	0.0179474	0.235037	0.200697	0.149684	0.151687	-0.148545	0.255566	-0.239364	0.333491	-0.0109954	0.0361708	0.21953	0.299621	0.17877	0.0350504	-0.357981	0.316159	0.148766	0.143531	0.099456	-0.142884	0.151578
GSM1524058	m6Acluster.A	0.220685	0.352275	0.451062	0.385157	0.287925	0.271165	0.0286495	0.335302	0.0654365	0.389916	0.11003	0.236369	0.513755	0.397407	0.2577	0.137833	-0.0230402	0.376846	0.27595	0.237158	0.242629	-0.0463532	0.168346
GSM1524059	m6Acluster.A	0.0243663	0.383459	0.337782	0.38128	0.265763	0.232854	0.0895986	0.376542	-0.0393029	0.418982	0.193503	0.327299	0.495161	0.409922	0.220539	0.116939	0.132273	0.418179	0.318368	0.240561	0.212109	-0.0497664	0.182524
GSM1524060	m6Acluster.C	-0.337961	0.208523	0.150804	0.28155	0.221971	0.291694	-0.17135	0.297134	-0.299331	0.335695	-0.0196661	0.0108549	0.18118	0.311428	0.152482	0.0596522	-0.272912	0.249811	0.102741	0.0542908	0.0655493	-0.0102684	0.089866
GSM1524061	m6Acluster.B	-0.316697	0.252181	0.229838	0.237578	0.201358	0.238333	-0.242928	0.216429	-0.277048	0.284073	-0.106778	-0.139986	0.104493	0.323232	0.109778	0.0190862	-0.30878	0.207597	0.00765588	0.0332875	0.0898622	-0.0824823	0.164652
GSM1524062	m6Acluster.A	-0.0392906	0.0963099	0.330286	0.198386	0.188866	0.183135	-0.000341632	0.195743	-0.0618702	0.300681	0.0168924	0.147204	0.252659	0.334136	0.170199	-0.0019629	-0.328894	0.300137	0.095639	0.140449	0.160026	-0.125516	0.129541
GSM1524068	m6Acluster.C	-0.171298	0.21735	0.303082	0.268497	0.187429	0.271075	-0.109903	0.284208	-0.199818	0.311332	-0.0596313	-0.11875	0.161386	0.327041	0.11537	-0.000529324	-0.309814	0.238675	0.0414647	0.124081	0.0793401	-0.114401	0.0700816
GSM1524069	m6Acluster.B	-0.318691	0.209031	0.233462	0.246055	0.191245	0.283769	-0.0784795	0.269664	-0.262076	0.311342	-0.0518737	-0.0771052	0.215266	0.31751	0.0853421	-0.0251961	-0.2383	0.235393	-0.00166373	0.0345856	0.0517954	-0.0884056	0.101822
GSM1524070	m6Acluster.C	-0.239569	0.105378	0.241233	0.227331	0.263754	0.302066	-0.091077	0.229278	-0.261782	0.295621	-0.0642442	-0.0229644	0.167053	0.336216	0.0819569	-0.00406697	-0.2878	0.283307	-0.021315	0.0650623	0.0636881	-0.0610078	0.134095
GSM1524071	m6Acluster.A	-0.135483	0.140671	0.27104	0.252791	0.232533	0.317406	-0.0908475	0.289482	-0.211597	0.30226	-0.0568394	-0.0873036	0.23069	0.343176	0.155988	0.00604808	-0.174689	0.276274	0.00985505	0.0955955	0.0685662	-0.115629	0.0847038
GSM1524072	m6Acluster.A	-0.0148571	0.180706	0.291315	0.294674	0.240187	0.266432	-0.0588561	0.252496	-0.177965	0.348602	0.0130707	0.00196144	0.328958	0.362233	0.169854	0.0149978	-0.295836	0.318359	0.0510182	0.145766	0.0860369	-0.0588966	0.10235
GSM2235556	m6Acluster.C	-0.367867	0.161395	0.168862	0.227701	0.179787	0.290107	-0.149911	0.22416	-0.332386	0.314466	0.0316073	-0.10551	0.147522	0.346932	0.109574	-0.0224258	-0.282769	0.28624	0.0544128	0.109659	0.0117987	-0.135953	0.0326169
GSM2235557	m6Acluster.A	-0.219493	0.111826	0.220696	0.250057	0.238256	0.304937	-0.095533	0.26788	-0.199706	0.367719	0.0823379	-0.0175481	0.26059	0.363562	0.116028	0.0374885	-0.249718	0.318226	0.113887	0.160434	0.123889	-0.0515424	0.0685729
GSM2235558	m6Acluster.A	-0.0457058	0.149627	0.281726	0.261092	0.23827	0.307151	-0.000295521	0.241356	-0.14442	0.331936	0.0591354	-0.0454275	0.306746	0.362425	0.128102	-0.0141812	-0.160909	0.309187	0.0986359	0.167102	0.123997	-0.066044	0.0645356
GSM2235559	m6Acluster.C	0.0274239	0.246596	0.319323	0.242484	0.190533	0.302198	-0.039569	0.220645	-0.0622397	0.358293	-0.00893047	-0.0797212	0.310667	0.376397	0.126127	0.0262304	-0.289941	0.306189	0.13849	0.168213	0.10753	-0.0397771	0.108603
GSM2235560	m6Acluster.A	-0.179405	0.224392	0.347074	0.287538	0.19814	0.28183	-0.0532213	0.213172	-0.193369	0.369683	0.0530488	0.00779981	0.342345	0.364042	0.160082	0.0274455	-0.345448	0.312233	0.124885	0.143007	0.142408	-0.0587726	0.101891
GSM2235561	m6Acluster.A	0.0305853	0.26785	0.311744	0.230123	0.224475	0.269662	-0.078861	0.249455	-0.0820486	0.315919	0.0542299	0.000472683	0.324031	0.363068	0.111955	0.0436143	-0.326948	0.320099	0.150764	0.183842	0.140238	-0.0672433	0.138089
GSM2235562	m6Acluster.C	-0.322504	0.228254	0.152395	0.201399	0.20425	0.296612	-0.0920507	0.244253	-0.279329	0.298089	-0.0290952	-0.131601	0.133595	0.326143	0.118827	-0.0152438	-0.200712	0.281944	0.0389981	0.11372	0.0462841	-0.0854954	0.0937975
GSM2235563	m6Acluster.C	-0.289738	0.269339	0.249455	0.243164	0.220478	0.27986	-0.084508	0.28479	-0.225954	0.374554	0.0506966	-0.104144	0.210353	0.328161	0.0935402	0.0356633	-0.328434	0.294683	0.171392	0.129024	0.0701862	-0.180705	0.0887809
GSM2235564	m6Acluster.C	-0.343818	0.249321	0.171813	0.213416	0.223724	0.252272	-0.145986	0.223977	-0.293017	0.310954	-0.0792718	-0.112565	0.115811	0.318708	0.052053	-0.0541732	-0.250146	0.242455	-0.0111654	0.0177449	0.0256878	-0.0538419	0.106724
GSM2235565	m6Acluster.B	-0.271201	0.0810404	0.248255	0.234329	0.173458	0.23795	-0.141872	0.187127	-0.259374	0.336343	-0.00484168	-0.0139899	0.181052	0.324093	0.17172	0.00563262	-0.286551	0.31715	0.0627262	0.101433	0.0930003	-0.101669	0.104359
GSM2235566	m6Acluster.C	-0.10279	0.209146	0.273868	0.226951	0.200609	0.282973	-0.0882982	0.224728	-0.220717	0.307767	-0.00603778	-0.0830251	0.232325	0.353414	0.147628	-0.0319703	-0.307719	0.287486	0.0632288	0.0895989	0.0440723	-0.0790277	0.153368
GSM2235567	m6Acluster.A	-0.073595	0.179625	0.276939	0.234476	0.2135	0.297147	-0.0643184	0.238141	-0.20313	0.337815	0.018255	0.0185116	0.275407	0.370346	0.134379	0.0466136	-0.34098	0.329071	0.115831	0.0751536	0.0898756	-0.110859	0.126146
GSM2235568	m6Acluster.C	-0.364119	0.1843	0.0651477	0.176063	0.219337	0.299029	-0.14892	0.184269	-0.290192	0.289639	-0.0397042	-0.114149	0.0997719	0.332653	0.129358	-0.0327863	-0.220252	0.299147	-0.0809316	0.0343825	0.00131404	-0.0973614	0.135826
GSM2235569	m6Acluster.C	-0.356424	0.236979	0.149092	0.244922	0.216607	0.274303	-0.15266	0.272248	-0.308135	0.306287	0.00894551	-0.0570274	0.135255	0.343278	0.122491	0.02697	-0.201663	0.262569	0.0467279	0.0866687	0.0294036	-0.0337604	0.082154
GSM2235570	m6Acluster.C	-0.229276	0.200476	0.126349	0.285466	0.217301	0.295536	-0.0879313	0.263269	-0.212315	0.363184	0.0477989	-0.0648925	0.263973	0.364545	0.20468	0.0616185	-0.272051	0.325646	0.143073	0.119863	0.09158	-0.100525	0.114715
GSM2235571	m6Acluster.C	-0.270483	0.246987	0.221997	0.313622	0.212999	0.305076	-0.137832	0.259171	-0.245692	0.347672	0.0502661	-0.036406	0.304665	0.361862	0.163055	0.0505003	-0.174857	0.332055	0.130332	0.120489	0.0641983	-0.0469164	0.0440304
GSM2235572	m6Acluster.A	0.0351966	0.274362	0.420097	0.298365	0.207761	0.275403	-0.0226898	0.224637	-0.127316	0.359791	0.0398406	0.00118803	0.363893	0.356029	0.178345	0.0334895	-0.277964	0.32818	0.131162	0.153588	0.142276	-0.104282	0.164909
GSM2235573	m6Acluster.C	-0.0416863	0.295394	0.37061	0.280526	0.218036	0.291607	-0.0341271	0.24641	-0.105066	0.36602	0.083189	-0.0182227	0.355487	0.359728	0.14918	0.0108585	-0.306559	0.297265	0.145629	0.159297	0.150792	-0.0417992	0.0924802
GSM2235574	m6Acluster.C	-0.335957	0.189173	0.172046	0.250468	0.209465	0.276125	-0.0525213	0.289032	-0.29973	0.344348	0.059786	0.0487722	0.27759	0.325145	0.135039	0.0907006	-0.24608	0.317203	0.135685	0.119254	0.095894	-0.051893	0.0399087
GSM2235575	m6Acluster.C	-0.346156	0.229393	0.105885	0.209258	0.235502	0.297306	-0.112782	0.186906	-0.307428	0.336772	-0.0372591	-0.0359232	0.215448	0.332061	0.0785568	-0.0320491	-0.149312	0.283523	0.0740517	0.0697598	0.0310371	-0.00314052	0.0969592
GSM2235576	m6Acluster.B	-0.193135	0.371881	0.369482	0.277585	0.295014	0.276712	0.0397891	0.310881	-0.14725	0.314232	0.0975063	0.03203	0.436562	0.332479	0.0896667	0.0152198	-0.30704	0.253871	0.245406	0.157155	0.108095	-0.0785648	0.138817
GSM2235577	m6Acluster.A	-0.13347	0.245169	0.329844	0.266699	0.205775	0.26267	-0.0569729	0.282663	-0.178802	0.390491	0.10478	0.0535099	0.418186	0.334921	0.119231	0.0356932	-0.284163	0.303528	0.209225	0.148298	0.153999	-0.0529287	0.164183
GSM2235578	m6Acluster.C	-0.105701	0.354419	0.378462	0.255931	0.237624	0.297897	0.00546141	0.296047	-0.160781	0.321105	0.0808753	0.0377953	0.362096	0.345126	0.0842639	0.0425709	-0.276326	0.305594	0.188447	0.166101	0.0902886	-0.0908276	0.123282
GSM2235579	m6Acluster.A	-0.238619	0.27108	0.356098	0.251383	0.284791	0.263721	-0.131969	0.287881	-0.146362	0.367489	0.109008	-0.0818749	0.426573	0.32259	0.129565	0.0416511	-0.291929	0.287372	0.223099	0.179565	0.14794	-0.0792944	0.100553
GSM2235580	m6Acluster.A	0.141981	0.347373	0.385559	0.292869	0.198368	0.288703	-0.00242971	0.296137	0.0260787	0.401488	0.151577	0.0449158	0.444993	0.364048	0.120631	0.0735476	-0.201149	0.305292	0.238937	0.180015	0.169818	-0.0636024	0.111547
GSM2235582	m6Acluster.C	-0.180553	0.208919	0.229644	0.305064	0.208382	0.296309	0.0257229	0.232165	-0.202339	0.341634	0.0436318	0.0204213	0.255449	0.336184	0.0847872	0.0170502	-0.193186	0.254925	0.111008	0.118768	0.0942711	-0.0574259	0.0254961
GSM2235584	m6Acluster.A	-0.243004	0.148684	0.206244	0.240179	0.238279	0.275421	-0.0187028	0.27823	-0.237359	0.344482	0.0594912	0.0586649	0.289526	0.344136	0.104411	0.0182966	-0.0849629	0.286822	0.131221	0.116708	0.0697848	-0.0250055	0.09796
GSM2235585	m6Acluster.B	-0.0865661	0.331616	0.397709	0.281267	0.240566	0.303989	-0.0292615	0.31299	-0.0562545	0.353915	0.143304	0.0349794	0.457828	0.368108	0.139201	0.0583265	-0.242535	0.313241	0.303402	0.216589	0.1422	-0.0419487	0.176762
GSM2235586	m6Acluster.B	0.271577	0.422719	0.510868	0.323721	0.269928	0.26772	0.110996	0.307259	0.176739	0.365306	0.170152	0.156836	0.520267	0.377008	0.176409	0.0474019	-0.267894	0.334045	0.323833	0.285533	0.198953	-0.0729544	0.140804
GSM2235587	m6Acluster.C	-0.165411	0.263909	0.267075	0.29149	0.238996	0.272736	-0.0366305	0.276264	-0.164445	0.352663	0.0474776	0.0723522	0.327994	0.328416	0.110456	0.0365706	-0.300681	0.275602	0.183379	0.127511	0.116378	-0.0775394	0.130859
GSM2235588	m6Acluster.A	-0.263929	0.111	0.169634	0.244703	0.207949	0.234272	-0.116849	0.230484	-0.218172	0.35075	0.039452	0.075953	0.244222	0.329845	0.0965434	0.0401081	-0.280983	0.278032	0.12724	0.140724	0.128234	-0.0524675	0.124062
GSM2235589	m6Acluster.B	-0.297321	0.257941	0.200083	0.191698	0.195882	0.235208	0.00300383	0.301866	-0.250937	0.277039	-0.0360819	0.0565912	0.188312	0.344584	0.10579	0.0308524	-0.246137	0.27777	0.0573265	0.0642998	0.0780983	-0.0852006	0.119468
GSM2235593	m6Acluster.B	-0.147004	0.341438	0.29582	0.287889	0.213213	0.23956	-0.0437062	0.285717	-0.138926	0.340837	0.0402637	-0.00712269	0.30286	0.340649	0.100093	0.0477026	-0.16343	0.245015	0.148072	0.130247	0.112984	-0.0245147	0.125011
GSM2235595	m6Acluster.C	0.17547	0.316627	0.427593	0.273508	0.223798	0.327853	0.0308045	0.214155	0.0264059	0.342072	0.0654213	0.0951842	0.363731	0.364957	0.149642	0.0154774	-0.277289	0.308743	0.167573	0.181608	0.144897	-0.0622316	0.117704
GSM2235596	m6Acluster.C	-0.106738	0.262312	0.290967	0.254048	0.241152	0.258838	0.0136938	0.237101	-0.182189	0.34094	0.0145834	-0.0251346	0.295682	0.355955	0.101408	-0.0313479	-0.168345	0.281801	0.0807621	0.122515	0.0914188	-0.106064	0.158603
GSM2235597	m6Acluster.C	-0.157755	0.286168	0.216553	0.238971	0.179654	0.289888	-0.108456	0.246656	-0.172893	0.282399	0.00109749	-0.0470788	0.23039	0.354211	0.08817	-0.0263587	-0.167069	0.293538	0.0503517	0.0913045	0.0354493	-0.0288196	0.136582
GSM2235598	m6Acluster.C	0.3414	0.326484	0.436642	0.302375	0.210166	0.314742	0.101934	0.275463	0.141394	0.352465	0.0661811	0.0564709	0.424243	0.388016	0.146929	0.08219	-0.236947	0.309543	0.225846	0.210715	0.166646	-0.085891	0.0826825
GSM2235599	m6Acluster.C	-0.0891784	0.283325	0.338214	0.2815	0.204888	0.304632	-0.129024	0.287132	-0.149533	0.360619	0.0503217	-0.00397249	0.292722	0.342372	0.125683	0.0191396	-0.261107	0.300696	0.126603	0.144729	0.103999	-0.0835899	0.115602
GSM2235600	m6Acluster.C	-0.205982	0.268486	0.270326	0.271764	0.21333	0.296091	-0.0714578	0.321213	-0.212001	0.360815	0.0977092	0.0760403	0.335256	0.372595	0.159711	0.067015	-0.200073	0.310943	0.224291	0.171118	0.136068	-0.0784879	0.12485
GSM2235601	m6Acluster.B	-0.0327998	0.208554	0.286041	0.244611	0.22431	0.258584	-0.0881915	0.295131	-0.11918	0.367134	0.0830017	0.129895	0.35301	0.348944	0.155691	0.0469085	-0.289905	0.302929	0.141898	0.177329	0.155262	-0.0287585	0.131349
GSM2235602	m6Acluster.A	0.195212	0.290874	0.410863	0.271583	0.207916	0.305062	0.0304745	0.239266	0.013371	0.329437	0.0662293	0.038669	0.355051	0.378764	0.153196	0.0411515	-0.270097	0.328301	0.197389	0.214765	0.14551	-0.0805081	0.101458
GSM2235603	m6Acluster.C	-0.296205	0.246712	0.179012	0.25761	0.211239	0.311773	-0.194654	0.257512	-0.243226	0.323322	0.000263688	-0.0689435	0.214878	0.332127	0.130918	0.0317402	-0.254349	0.268166	0.0973118	0.135098	0.0761214	-0.105394	0.0783004
GSM2235604	m6Acluster.C	-0.270773	0.31111	0.291074	0.275945	0.238356	0.295154	-0.0919684	0.290538	-0.23747	0.292708	-0.00477394	0.0316874	0.23489	0.340447	0.140054	0.0382352	-0.3476	0.285908	0.0995137	0.0911499	0.0898284	-0.0449791	0.162055
GSM2235605	m6Acluster.A	-0.131423	0.222102	0.326665	0.263809	0.239128	0.292785	-0.0400014	0.268985	-0.13709	0.363531	0.0637371	0.10989	0.339295	0.346713	0.123739	0.0313471	-0.238652	0.318542	0.142014	0.186985	0.146023	-0.0810581	0.137015
GSM2235606	m6Acluster.A	0.10892	0.264558	0.401671	0.284539	0.218947	0.301406	-0.0228987	0.285663	-0.0348005	0.358028	0.126045	0.119197	0.436072	0.385445	0.164833	0.0484521	-0.24886	0.335759	0.208133	0.213637	0.164696	-0.116174	0.124952
GSM2235607	m6Acluster.C	-0.303852	0.227491	0.226178	0.346937	0.213006	0.293722	-0.0942662	0.36087	-0.122212	0.407021	0.124004	0.144367	0.358413	0.356375	0.19909	0.0897009	-0.00227759	0.344004	0.258215	0.173289	0.125984	-0.038828	0.13131
GSM2235608	m6Acluster.C	-0.371054	0.240233	0.219551	0.22476	0.208864	0.256895	-0.0857974	0.287993	-0.263273	0.340523	-0.0382227	-0.0184296	0.182117	0.328842	0.0970292	0.00148051	-0.245475	0.203755	0.103109	0.085412	0.0464312	-0.063137	0.14363
GSM2235609	m6Acluster.A	0.0872763	0.334529	0.452529	0.299684	0.229256	0.288825	-0.0117928	0.320478	-0.00849992	0.376433	0.121102	0.0941224	0.456667	0.377234	0.147818	0.0710418	-0.22752	0.319017	0.208492	0.204249	0.170621	-0.0765395	0.171251
GSM2235610	m6Acluster.A	-0.167445	0.20914	0.352489	0.253038	0.206247	0.306108	-0.115139	0.337242	-0.159138	0.368104	0.12117	0.0838525	0.37386	0.344188	0.160807	0.0829092	-0.224049	0.321332	0.187497	0.152187	0.132246	-0.0638602	0.154647
GSM2235611	m6Acluster.C	-0.148185	0.179085	0.253537	0.242371	0.244919	0.248848	-0.0945407	0.319436	-0.172962	0.36654	0.0460185	0.0249076	0.292235	0.336826	0.122376	0.0218884	-0.232238	0.254134	0.119528	0.103807	0.0915425	-0.0588935	0.119335
GSM2235612	m6Acluster.A	-0.123726	0.150412	0.319901	0.249472	0.203413	0.252827	-0.0968978	0.254896	-0.157119	0.343937	0.0290136	0.0340116	0.306837	0.337636	0.165849	0.0414149	-0.272385	0.300183	0.132626	0.148945	0.126134	-0.0854877	0.115467
GSM2235613	m6Acluster.C	-0.335972	0.203602	0.183613	0.186891	0.223634	0.275333	-0.106441	0.250511	-0.328295	0.333529	-0.0733566	-0.0575698	0.165985	0.334414	0.0801244	-0.00427426	-0.207193	0.272278	0.0511142	0.0451827	0.026642	-0.0867633	0.109825
GSM2235614	m6Acluster.C	-0.0828652	0.344768	0.422893	0.293399	0.237492	0.280122	-0.110244	0.325523	-0.0989682	0.384572	0.104633	0.0270659	0.383625	0.342979	0.173238	0.0439818	-0.235815	0.262571	0.228628	0.190521	0.124491	-0.0783384	0.14771
GSM2235615	m6Acluster.C	-0.203369	0.219355	0.200761	0.228983	0.209441	0.291329	-0.0827759	0.25607	-0.249739	0.337902	0.0186922	0.0475355	0.219285	0.368528	0.13072	0.0522011	-0.228502	0.292564	0.088867	0.102738	0.108603	-0.0977108	0.1185
GSM2235616	m6Acluster.C	-0.134909	0.293681	0.34483	0.295621	0.202599	0.282762	-0.156007	0.320761	-0.122333	0.410754	0.0556301	0.057036	0.360015	0.347702	0.175359	0.020349	-0.0518809	0.311859	0.179026	0.172397	0.129131	-0.0413781	0.128626
GSM2235617	m6Acluster.B	-0.27738	0.306999	0.306786	0.274817	0.246256	0.253976	-0.141774	0.269634	-0.197101	0.370839	0.0290035	0.020896	0.295308	0.328939	0.141126	0.0180199	-0.297384	0.248487	0.139173	0.108174	0.0744663	-0.0236493	0.179913
GSM2235618	m6Acluster.B	-0.265251	0.294052	0.235655	0.238324	0.246866	0.265153	-0.0959006	0.250445	-0.228383	0.343532	-0.086116	-0.0498385	0.211914	0.345452	0.110499	-0.0255448	-0.305156	0.258143	0.0426892	0.073486	0.0734215	-0.0710263	0.106554
GSM2235619	m6Acluster.C	-0.210901	0.227138	0.222486	0.270471	0.203881	0.282391	-0.0540723	0.236255	-0.201559	0.31991	0.00549059	0.00338117	0.200647	0.339311	0.104071	0.00702954	-0.262123	0.286919	0.0597545	0.11413	0.0597667	-0.0840604	0.150581
GSM2235620	m6Acluster.C	-0.146771	0.234981	0.24632	0.263642	0.237775	0.289652	-0.131165	0.278018	-0.161361	0.36014	0.0509759	-0.0936581	0.271963	0.328289	0.122107	0.00587975	-0.283556	0.273344	0.119895	0.0970979	0.0876274	-0.0575346	0.10551
GSM2235621	m6Acluster.C	-0.306717	0.18607	0.237533	0.207122	0.181672	0.263263	-0.0781731	0.264104	-0.249593	0.345147	0.0165056	0.0376149	0.246149	0.335026	0.134698	0.00488853	-0.124052	0.301506	0.0379749	0.0797008	0.0911363	-0.132542	0.0540692
GSM2235622	m6Acluster.B	0.0682958	0.246933	0.360954	0.272023	0.213058	0.277169	0.123611	0.273423	-0.0217009	0.330219	0.0695357	0.139938	0.332832	0.360571	0.158245	0.0158364	-0.272449	0.320124	0.15519	0.176171	0.153549	-0.115108	0.142261
GSM2235623	m6Acluster.B	-0.222848	0.31466	0.292766	0.300696	0.213079	0.286137	-0.101637	0.309865	-0.171133	0.328685	0.00909599	0.124073	0.291509	0.340186	0.127082	0.0396104	-0.167806	0.247255	0.135073	0.0931125	0.055526	-0.00319825	0.163106
GSM2235624	m6Acluster.B	-0.251767	0.308415	0.289908	0.262992	0.229599	0.262586	-0.0538396	0.305838	-0.203614	0.373465	0.0479365	0.0218135	0.265998	0.331376	0.107434	0.0711008	-0.16194	0.280448	0.158623	0.0892007	0.0880581	-0.0800576	0.152046
GSM2235625	m6Acluster.A	-0.0494758	0.186555	0.375204	0.289757	0.206284	0.250308	-0.026622	0.316763	-0.127797	0.382966	0.129068	0.143788	0.431107	0.34341	0.169612	0.0335549	-0.196966	0.322023	0.201945	0.180161	0.165102	-0.0730853	0.147465
GSM2235626	m6Acluster.A	-0.138241	0.189867	0.29752	0.271493	0.229114	0.267471	0.0676617	0.38808	-0.118969	0.389277	0.196942	0.181365	0.449758	0.354074	0.185418	0.0930851	-0.125156	0.347901	0.291159	0.200116	0.170802	-0.111624	0.127077
GSM2235627	m6Acluster.A	-0.263742	0.241747	0.250918	0.243508	0.219324	0.304582	-0.126676	0.282293	-0.201158	0.319656	0.0521863	-0.013132	0.317565	0.346463	0.137451	0.00105134	-0.141867	0.308499	0.172964	0.111237	0.100413	-0.0732691	0.0833171
GSM2235628	m6Acluster.B	-0.174983	0.188654	0.239814	0.269748	0.217338	0.252399	-0.00740755	0.315982	-0.179312	0.370942	0.147077	0.0860518	0.368279	0.323222	0.180297	0.0832473	-0.188226	0.307405	0.284883	0.17503	0.13982	-0.0950783	0.135297
GSM2235629	m6Acluster.B	0.0204796	0.311545	0.371524	0.280225	0.196936	0.267758	0.0435907	0.352334	-0.0748714	0.372814	0.128762	0.208041	0.436868	0.361935	0.170551	0.0564347	-0.11392	0.336316	0.257853	0.174645	0.165748	-0.0764373	0.153989
GSM2235630	m6Acluster.B	0.0600418	0.209075	0.332733	0.289938	0.200099	0.266427	0.0273176	0.296921	-0.00884408	0.339509	0.052919	0.112366	0.360646	0.372883	0.15935	0.036453	-0.22779	0.355052	0.172363	0.185443	0.169449	-0.117111	0.0836176
GSM2235631	m6Acluster.A	0.108824	0.313848	0.436878	0.298327	0.222386	0.273123	0.0518086	0.297179	0.0141857	0.381835	0.113268	0.0523928	0.414814	0.35471	0.149282	0.0443435	-0.20704	0.316094	0.224762	0.198204	0.161308	-0.0951949	0.114551
GSM2235632	m6Acluster.B	0.0817749	0.383676	0.395819	0.261304	0.205707	0.270663	-0.048204	0.352112	0.0137545	0.36961	0.117742	0.0337688	0.416488	0.374397	0.150023	0.0428705	-0.181266	0.290924	0.244015	0.218637	0.150922	-0.0634915	0.143711
GSM2235633	m6Acluster.B	-0.0709295	0.27844	0.386427	0.300076	0.218012	0.248657	-0.0244516	0.320297	-0.0611445	0.408432	0.132686	0.0966334	0.458588	0.356619	0.183808	0.0480869	-0.116146	0.34668	0.234416	0.193586	0.183218	-0.0722358	0.149785
GSM2235634	m6Acluster.C	-0.246829	0.216232	0.183749	0.279537	0.236472	0.270342	-0.122445	0.327803	-0.215685	0.400925	0.0730222	0.191632	0.28871	0.341316	0.127552	0.0515216	-0.212828	0.328354	0.123888	0.13431	0.116135	-0.0169203	0.125523
GSM2235635	m6Acluster.C	-0.133219	0.353842	0.378794	0.278291	0.223029	0.274629	-0.0424932	0.307732	-0.169269	0.353182	0.0305513	0.00714491	0.295304	0.3603	0.137392	0.0346266	-0.239086	0.285417	0.175241	0.152761	0.105601	-0.109589	0.140307
GSM2235636	m6Acluster.A	-0.194592	0.156204	0.353967	0.231322	0.226632	0.238907	-0.0403264	0.293414	-0.159894	0.400933	0.0934017	0.104387	0.392136	0.340459	0.147849	0.0192318	-0.191802	0.334155	0.175123	0.183643	0.158135	-0.0855043	0.114003
GSM2235637	m6Acluster.C	-0.0207466	0.361066	0.36695	0.290002	0.255343	0.305091	-0.0322219	0.269766	-0.0531926	0.347432	0.0275906	0.0783813	0.323352	0.361074	0.140887	0.0544968	-0.231613	0.311194	0.146253	0.137196	0.113706	-0.0388837	0.156159
GSM2235695	m6Acluster.C	-0.19803	0.311702	0.188022	0.308133	0.24597	0.250294	-0.176059	0.307563	-0.158338	0.325369	-0.00369223	-0.0234281	0.150963	0.342035	0.214164	0.0675095	-0.121435	0.198519	0.0790789	0.0830062	0.0492619	-0.0351501	0.156279
GSM2235696	m6Acluster.B	-0.189599	0.398035	0.408706	0.276987	0.194831	0.252516	-0.0474965	0.295803	-0.113447	0.3059	0.026518	-0.0203843	0.30188	0.328313	0.179395	0.100328	-0.220781	0.273029	0.165539	0.128668	0.113496	-0.0899469	0.207761
GSM2235697	m6Acluster.C	-0.305579	0.211831	0.114179	0.205482	0.18956	0.262102	-0.171157	0.246312	-0.270057	0.279011	-0.09834	-0.0804349	0.0945957	0.349004	0.0941193	0.00895454	-0.222215	0.280985	0.0262154	0.016779	0.00944502	-0.168317	0.127905
GSM2235698	m6Acluster.B	-0.283921	0.261276	0.28947	0.255285	0.200736	0.276511	-0.0939671	0.28072	-0.238295	0.301108	0.0265012	0.0646525	0.200183	0.335261	0.0908977	0.0501539	-0.246793	0.283259	0.0862083	0.0999427	0.0584986	-0.115368	0.105296
GSM2235699	m6Acluster.B	-0.297434	0.221037	0.215978	0.24323	0.194942	0.264616	-0.145038	0.322199	-0.246933	0.357182	0.022585	0.00679532	0.243725	0.283542	0.155927	0.0418394	-0.264477	0.301624	0.156336	0.130486	0.099575	-0.0713832	0.142143
GSM2235700	m6Acluster.B	-0.0867423	0.311389	0.308062	0.306559	0.197335	0.275529	0.0015501	0.290114	-0.136573	0.353482	0.00267767	0.080728	0.313573	0.318046	0.141461	0.0325921	-0.127257	0.322096	0.16192	0.131247	0.0956403	-0.0730908	0.180735
GSM2235701	m6Acluster.C	-0.296871	0.271244	0.163706	0.21072	0.200795	0.264428	-0.0546778	0.251241	-0.271944	0.284284	-0.0754903	-0.0346891	0.16344	0.315387	0.0853498	-0.014237	-0.23093	0.279379	0.0223387	0.055487	0.02927	-0.0832186	0.100297
GSM2235702	m6Acluster.B	-0.299637	0.190879	0.221907	0.285866	0.229299	0.271172	-0.041353	0.277918	-0.243466	0.369727	0.040704	0.0332741	0.277321	0.316149	0.176617	0.046836	-0.28388	0.296351	0.137194	0.133223	0.104593	-0.0905472	0.145317
GSM2235703	m6Acluster.B	0.0177928	0.28841	0.28802	0.25525	0.19407	0.240377	-0.019812	0.293508	-0.0903948	0.340127	0.00421649	0.0367295	0.295602	0.307718	0.156742	0.021262	-0.224667	0.305063	0.124216	0.129596	0.0953581	-0.103971	0.19187
GSM2235704	m6Acluster.A	-0.0774688	0.225453	0.266884	0.290648	0.216049	0.257132	0.00681243	0.293081	-0.129264	0.337324	0.0283951	0.0785112	0.29129	0.339238	0.155336	0.0442112	-0.179576	0.300826	0.130824	0.138136	0.101113	-0.0724587	0.126709
GSM2235705	m6Acluster.A	-0.210924	0.155584	0.220011	0.293685	0.218252	0.273718	0.00539565	0.290385	-0.164553	0.331791	0.0496926	0.0867014	0.283366	0.376674	0.13844	0.0536584	-0.139839	0.297608	0.133221	0.145797	0.0843565	-0.0694862	0.0797588
GSM2235706	m6Acluster.C	-0.261929	0.213198	0.177246	0.252541	0.173307	0.253294	-0.144299	0.277334	-0.239038	0.305082	-0.0213682	0.00808835	0.207219	0.330131	0.1119	0.0604172	-0.262686	0.270878	0.084171	0.098367	0.0350858	-0.129722	0.100571
GSM2235707	m6Acluster.B	-0.182233	0.310999	0.248064	0.277673	0.220469	0.245618	-0.0173517	0.297058	-0.184308	0.405279	0.0221566	-0.01653	0.316448	0.341127	0.144542	0.0252105	-0.215387	0.269167	0.167051	0.110038	0.0781651	-0.0274554	0.161859
GSM2235708	m6Acluster.B	-0.101216	0.329842	0.316876	0.271152	0.171651	0.260137	-0.0299584	0.282042	-0.151641	0.322891	0.0198234	-0.0259667	0.218349	0.369112	0.147498	0.00899923	-0.172556	0.292245	0.118926	0.117213	0.0725746	-0.0737947	0.183887
GSM2235709	m6Acluster.C	-0.30836	0.29328	0.347644	0.254281	0.205118	0.281642	-0.0898533	0.254908	-0.24878	0.338047	0.0252743	0.0130536	0.195234	0.399843	0.0893041	0.0266863	-0.196325	0.301281	0.0890556	0.103358	0.0393584	-0.12737	0.166718
GSM2235710	m6Acluster.C	-0.282792	0.2377	0.218232	0.279397	0.183743	0.245507	-0.0460728	0.274086	-0.225078	0.357921	-0.0199958	0.0494809	0.238876	0.363603	0.176788	0.0714394	-0.198571	0.347781	0.184092	0.140806	0.088015	-0.026065	0.159703
GSM2235711	m6Acluster.B	-0.186956	0.346017	0.361131	0.265933	0.213374	0.258226	-0.087314	0.273607	-0.206159	0.305005	-0.010572	-0.0120714	0.237615	0.316845	0.150764	0.0212107	-0.212574	0.282502	0.14136	0.120852	0.0708955	-0.112661	0.195415
GSM2235712	m6Acluster.C	-0.368211	0.200522	0.0872028	0.224728	0.167791	0.217821	-0.181694	0.209722	-0.27284	0.286246	-0.107083	-0.0633595	0.0168535	0.316966	0.0622995	-0.0196781	-0.187536	0.25788	-0.0273919	0.0179787	-0.00782774	-0.0675898	0.105828
GSM2235713	m6Acluster.B	-0.0862704	0.112359	0.218105	0.22383	0.222536	0.235585	0.0111362	0.234818	-0.0940223	0.306327	-0.00942861	0.00156738	0.201372	0.332767	0.169599	-0.00695124	-0.288408	0.287011	0.0911632	0.12847	0.108379	-0.0648228	0.11202
GSM2235714	m6Acluster.B	-0.349228	0.135545	0.11842	0.208493	0.21507	0.243353	-0.133855	0.214534	-0.265559	0.279842	-0.0968306	-0.0379097	0.068619	0.34233	0.06812	-0.0573651	-0.190406	0.274	0.00708896	0.0328186	0.00281058	-0.0957116	0.193375
GSM2235715	m6Acluster.B	-0.166084	0.387556	0.445912	0.308954	0.215028	0.228605	-0.0664688	0.353612	-0.100791	0.378647	0.116391	0.0183826	0.38683	0.34585	0.185598	0.0675015	-0.222229	0.287148	0.24582	0.150798	0.1219	-0.062277	0.196538
GSM2235716	m6Acluster.B	-0.325513	0.25602	0.162603	0.202375	0.215638	0.213257	-0.0560025	0.265351	-0.291619	0.263306	-0.0873222	-0.0920814	0.114139	0.273618	0.166668	0.014043	-0.27537	0.269428	0.0348131	0.064392	0.017114	-0.138703	0.211347
GSM2235717	m6Acluster.A	-0.28528	0.144254	0.293095	0.308632	0.185041	0.273457	-0.0404598	0.252864	-0.252752	0.319715	0.0288459	0.0893632	0.314376	0.339434	0.152926	0.0337453	-0.187773	0.305074	0.0858601	0.123623	0.111183	-0.104508	0.130509
GSM2235718	m6Acluster.A	0.0199883	0.253977	0.34763	0.278269	0.243818	0.28892	-0.0113241	0.250186	-0.136444	0.342798	-0.0110414	0.0778785	0.309298	0.372983	0.138391	-0.00903504	-0.0870525	0.309939	0.107155	0.128742	0.0751689	-0.049566	0.126211
GSM2235719	m6Acluster.C	-0.224924	0.256845	0.27653	0.309353	0.216125	0.289891	-0.0967364	0.293296	-0.205584	0.340539	-0.00576445	0.0261148	0.278305	0.331385	0.134667	0.0665358	-0.199105	0.296165	0.13744	0.118008	0.071447	-0.0399058	0.0511734
GSM2235720	m6Acluster.A	-0.208363	0.229954	0.260277	0.261793	0.242438	0.291038	-0.190312	0.313531	-0.209653	0.360722	0.0010818	-0.0781492	0.239703	0.340112	0.118816	0.0352198	-0.260783	0.331693	0.163813	0.0881491	0.0789636	-0.127214	0.118407
GSM2235721	m6Acluster.B	-0.250846	0.275852	0.306082	0.261361	0.208594	0.265439	-0.0997284	0.330576	-0.18367	0.309885	0.00853188	0.0593423	0.281402	0.364293	0.198931	0.044276	-0.202869	0.311871	0.163565	0.139128	0.123263	-0.0579123	0.110944
GSM2235722	m6Acluster.A	-0.0577489	0.280931	0.330837	0.295248	0.222436	0.281914	-0.118227	0.303365	-0.167962	0.345321	0.0804888	0.0918736	0.358174	0.337186	0.182436	0.0512473	-0.158616	0.303833	0.102974	0.127508	0.131334	-0.0711159	0.141604
GSM2235723	m6Acluster.B	-0.349563	0.153058	0.140076	0.217851	0.203124	0.295593	-0.120173	0.237579	-0.291314	0.282285	-0.0251667	-0.0611134	0.107392	0.31846	0.0855313	-0.0603394	-0.199769	0.265861	-0.0218213	0.0380475	0.0047298	-0.104859	0.11427
GSM2235724	m6Acluster.B	-0.0221934	0.322994	0.34546	0.295999	0.238287	0.259678	-0.0651393	0.330042	-0.106927	0.354196	0.0908293	0.128908	0.383224	0.339386	0.167386	0.0837086	-0.2433	0.291866	0.202532	0.151723	0.152246	-0.0578636	0.187066
GSM2235725	m6Acluster.B	-0.106129	0.392207	0.485041	0.339041	0.215131	0.274051	-0.0579737	0.356035	-0.058072	0.347044	0.126861	0.153595	0.502045	0.371211	0.239181	0.114801	-0.162185	0.334899	0.284209	0.189609	0.200254	-0.00920901	0.161184
GSM2235726	m6Acluster.B	0.198766	0.398631	0.528078	0.323271	0.225962	0.247538	-6.32e-05	0.345266	0.0788704	0.32862	0.127863	0.115911	0.538842	0.395741	0.226688	0.0743689	-0.166212	0.366592	0.278106	0.246416	0.177525	-0.0738743	0.19913
GSM2235727	m6Acluster.A	-0.134291	0.233065	0.366104	0.294934	0.261225	0.278608	-0.0679961	0.300465	-0.209663	0.320655	0.0664607	0.11384	0.320347	0.404745	0.143392	-0.00662333	-0.149963	0.289494	0.123928	0.128328	0.111835	-0.0540736	0.135039
GSM2235728	m6Acluster.B	-0.147748	0.283151	0.304286	0.28896	0.213915	0.286357	-0.0767401	0.305541	-0.208534	0.353457	0.0660056	0.158146	0.325135	0.360727	0.167795	0.0471196	-0.175335	0.349807	0.12558	0.13315	0.132874	-0.0944528	0.189464
GSM2235729	m6Acluster.A	-0.0845549	0.310393	0.375399	0.313667	0.197751	0.254559	-0.0137635	0.328226	-0.136389	0.349865	0.0767488	0.188855	0.369998	0.330241	0.188318	0.056183	-0.190194	0.31982	0.199713	0.15646	0.140619	-0.0596876	0.160312
GSM2235730	m6Acluster.C	-0.248199	0.284713	0.196328	0.252283	0.212049	0.286435	-0.0971425	0.284303	-0.227996	0.329241	-0.0119512	-0.000330535	0.240845	0.299418	0.106835	0.0303951	-0.191358	0.238298	0.141708	0.0921415	0.0425281	-0.0755285	0.0993614
GSM2235731	m6Acluster.B	-0.246155	0.306919	0.353441	0.308042	0.194219	0.285245	-0.123873	0.247336	-0.184094	0.249151	-0.0395813	-0.0313457	0.226366	0.362598	0.151797	0.0118157	-0.175606	0.252887	0.0591272	0.0550933	0.0810444	-0.0958403	0.0946346
GSM2235732	m6Acluster.A	0.0451326	0.336522	0.395569	0.288132	0.211953	0.259759	0.0409322	0.352136	-0.0404021	0.358243	0.0983598	0.11167	0.401885	0.354644	0.178033	0.0251504	-0.0541016	0.340797	0.190651	0.18798	0.116411	-0.0805952	0.154348
GSM2235733	m6Acluster.A	-0.265964	0.265985	0.28161	0.347792	0.242901	0.264032	-0.13995	0.28743	-0.171976	0.362041	0.0655628	0.112263	0.373277	0.325587	0.194883	0.0901775	-0.182161	0.299697	0.192907	0.12512	0.110901	-0.0517694	0.17089
GSM2235734	m6Acluster.C	-0.218383	0.228781	0.186426	0.261201	0.209726	0.279448	-0.103939	0.27386	-0.211605	0.320417	0.0187568	0.108682	0.292106	0.349542	0.132265	0.03735	-0.212757	0.26905	0.0769883	0.161386	0.0910986	-0.0737779	0.0899228
GSM2235735	m6Acluster.A	-0.154316	0.292675	0.18018	0.361391	0.178383	0.250958	-0.0730111	0.297755	-0.0853898	0.382309	0.136754	0.101713	0.330547	0.318861	0.150335	0.0203683	0.208499	0.341938	0.147352	0.0600181	0.0901827	-0.0225769	0.179549
GSM2235736	m6Acluster.C	-0.394538	0.168141	0.0891123	0.198998	0.227855	0.28121	-0.168633	0.26288	-0.254775	0.272526	-0.0386675	-0.125568	0.0755338	0.327426	0.0668737	-0.0081061	-0.181859	0.292779	0.0156443	0.0174464	-0.00658453	-0.129119	0.099521
GSM2235737	m6Acluster.B	0.220826	0.300147	0.303671	0.335913	0.194836	0.262435	0.0454783	0.326658	0.054276	0.348874	0.0835014	0.0983006	0.388138	0.352763	0.170647	0.0655153	-0.0661243	0.328394	0.219604	0.186616	0.11699	-0.0455546	0.133561
GSM2235738	m6Acluster.B	-0.355282	0.281026	0.226925	0.308193	0.158299	0.249183	-0.138902	0.275447	-0.237387	0.304476	-0.00753967	-0.0800053	0.191759	0.331825	0.150378	0.0254064	-0.252458	0.270591	0.111382	0.0847331	0.0533818	-0.11382	0.113819
GSM2235739	m6Acluster.B	-0.377269	0.213646	0.108828	0.251985	0.196232	0.248506	-0.121595	0.255653	-0.292292	0.306763	-0.075115	0.0953367	0.158771	0.319939	0.107008	0.0535538	-0.207688	0.242965	0.0317047	0.0879827	0.0253928	-0.0809871	0.113103
GSM2235740	m6Acluster.A	-0.114314	0.192721	0.275799	0.321782	0.2234	0.277732	-0.00769854	0.224906	-0.132308	0.306207	-0.0443747	-0.0821183	0.193401	0.353488	0.118936	-0.000193397	-0.0679802	0.271438	0.0642804	0.0859126	0.0787486	-0.0180563	0.105124
GSM2235741	m6Acluster.A	-0.38104	0.244089	0.122188	0.256258	0.185165	0.260522	-0.193083	0.273671	-0.233766	0.277109	0.00542094	-0.0527496	0.253554	0.295145	0.145628	-0.0170044	-0.243607	0.275758	0.125153	0.127993	0.0424316	-0.165604	0.104424
GSM2235742	m6Acluster.B	-0.131066	0.314608	0.306493	0.295618	0.207588	0.277985	-0.0934195	0.314025	-0.149548	0.323444	0.0521226	-0.0158161	0.306643	0.319186	0.194198	0.0326695	-0.313289	0.295179	0.176461	0.164874	0.0787558	-0.0865436	0.0746941
GSM2235743	m6Acluster.B	-0.227093	0.296219	0.311395	0.33703	0.222859	0.286682	-0.0069226	0.31416	-0.183192	0.339303	0.0380644	0.070031	0.353427	0.355543	0.150882	0.0737578	-0.194391	0.311371	0.257567	0.127364	0.107443	-0.0908865	0.108109
GSM2235744	m6Acluster.A	-0.136107	0.122764	0.211623	0.251612	0.216675	0.289529	-0.107401	0.263317	-0.208081	0.337897	0.012247	0.0579207	0.217409	0.34471	0.123001	0.0129984	-0.276292	0.299018	0.0833263	0.109844	0.0891911	-0.0764812	0.0864457
GSM2235745	m6Acluster.B	-0.0333177	0.331205	0.427991	0.328672	0.221921	0.215743	-0.0867197	0.246696	-0.126048	0.312953	0.0629008	0.0535227	0.349852	0.343237	0.191974	0.0567334	-0.227572	0.280438	0.145102	0.122753	0.116021	-0.0787703	0.198391
GSM2235746	m6Acluster.B	-0.0582962	0.214718	0.357149	0.264381	0.266555	0.218066	-0.0368403	0.295856	-0.17601	0.298557	-0.0263214	0.0736212	0.258114	0.31273	0.12886	-0.0486807	-0.200337	0.280203	0.0866929	0.0847128	0.0865999	-0.0894956	0.0879245
GSM2235747	m6Acluster.B	-0.364768	0.282399	0.244738	0.316871	0.187593	0.284769	-0.0611141	0.344271	-0.226733	0.348244	0.105391	0.0482217	0.299801	0.328456	0.165565	0.0717034	-0.200391	0.287097	0.269233	0.137479	0.106892	-0.104651	0.181966
GSM2235748	m6Acluster.C	-0.187388	0.354986	0.259344	0.254306	0.164761	0.285997	-0.0740507	0.310226	-0.210077	0.354906	0.000520424	0.0140205	0.242073	0.323406	0.189907	0.0824369	-0.286266	0.32594	0.117492	0.11903	0.128776	-0.0872062	0.20977
GSM2235749	m6Acluster.C	-0.187818	0.236792	0.155135	0.202192	0.204219	0.267658	-0.13292	0.224643	-0.171094	0.278995	-0.0934102	-0.0484654	0.129504	0.340563	0.0952659	0.00289262	-0.166767	0.30657	0.102698	0.0702276	0.0322564	-0.161423	0.113104
GSM2235750	m6Acluster.A	-0.345047	0.192816	0.140461	0.246331	0.190562	0.284993	-0.153233	0.327533	-0.251715	0.320916	-0.0200161	0.0175519	0.260194	0.315104	0.145633	0.0781873	-0.250718	0.292178	0.144934	0.134599	0.0882583	-0.0431744	0.103736
GSM2235751	m6Acluster.C	-0.219602	0.357925	0.392666	0.301741	0.279951	0.182493	0.0161037	0.303604	-0.152931	0.369821	0.0866575	0.0732327	0.376794	0.334729	0.140604	0.0397193	-0.234132	0.276249	0.303443	0.175144	0.0981912	-0.0827887	0.150943
GSM2235752	m6Acluster.B	-0.0238722	0.31458	0.400244	0.351405	0.237181	0.23141	-0.0649268	0.299216	-0.10594	0.360709	0.000806291	0.0122111	0.35271	0.361012	0.164866	0.0103497	-0.015247	0.291504	0.12346	0.121446	0.0957953	-0.0238093	0.158498
GSM2235753	m6Acluster.C	0.00582637	0.306679	0.396633	0.30389	0.20743	0.272223	0.00334065	0.296418	-0.124538	0.325812	0.0448217	0.0957513	0.44635	0.384108	0.191415	0.0466059	-0.176484	0.318415	0.196254	0.199599	0.0959356	-0.0937729	0.0998796
GSM2235754	m6Acluster.A	-0.316135	0.160573	0.196281	0.3056	0.208169	0.256169	-0.0293841	0.380033	-0.193136	0.382944	0.13254	0.173801	0.379806	0.339701	0.183538	0.0669656	-0.0410579	0.348345	0.294965	0.184232	0.132911	-0.13008	0.106576
GSM2235755	m6Acluster.A	-0.0992936	0.115388	0.324476	0.248898	0.196855	0.204101	-0.0166799	0.246295	-0.165951	0.318399	0.00995003	0.106828	0.276024	0.307299	0.15486	0.0120641	-0.289342	0.325202	0.109959	0.12657	0.13383	-0.0955698	0.135837
GSM2235756	m6Acluster.A	0.0408179	0.253065	0.343645	0.292747	0.245043	0.263272	-0.00679904	0.320807	-0.0959202	0.361467	0.110252	0.169103	0.409845	0.353648	0.162481	0.0664291	-0.229707	0.320949	0.227396	0.154389	0.120379	-0.0973074	0.113818
GSM2235757	m6Acluster.A	-0.166272	0.2969	0.22116	0.282523	0.204319	0.248827	-0.0769334	0.351559	-0.170113	0.387907	0.0686688	0.0526169	0.318976	0.347333	0.176531	0.0559627	-0.242217	0.329236	0.202895	0.155698	0.0691392	-0.146015	0.0938633
GSM2235758	m6Acluster.C	-0.349737	0.177671	0.125848	0.289577	0.22915	0.261006	-0.269716	0.247888	-0.270253	0.293957	-0.0214223	-0.0440322	0.268345	0.330765	0.126352	-0.00669781	-0.102575	0.265195	0.071276	0.104424	0.0435379	-0.0325581	0.128544
GSM2235759	m6Acluster.A	-0.229956	0.141875	0.275467	0.277631	0.232764	0.252684	-0.130161	0.338208	-0.21122	0.357686	0.0675799	0.0844659	0.375023	0.343112	0.202618	0.0975496	-0.13961	0.326493	0.193453	0.178551	0.107248	-0.144954	0.0501241
GSM2235760	m6Acluster.C	-0.318201	0.227017	0.224569	0.220682	0.191606	0.264376	-0.149476	0.275581	-0.258386	0.325352	0.0384261	0.00564072	0.168825	0.34502	0.141632	0.0296335	-0.285868	0.310326	0.0824639	0.120272	0.0605302	-0.0766477	0.0844
GSM2235761	m6Acluster.A	-0.000278336	0.233345	0.324351	0.275754	0.222717	0.27534	0.031447	0.247862	-0.097831	0.345713	0.0260557	0.0751058	0.301826	0.352523	0.145401	0.0347221	-0.271638	0.334215	0.131785	0.125193	0.138177	-0.125194	0.155259
GSM2235762	m6Acluster.A	-0.256367	0.236444	0.208261	0.294374	0.198644	0.285709	-0.151348	0.30162	-0.22915	0.316507	0.0258847	0.0825359	0.347959	0.348556	0.141598	0.0396137	-0.212677	0.268709	0.177183	0.128853	0.0834309	-0.00243559	0.124231
GSM2235763	m6Acluster.C	0.0546769	0.345176	0.375595	0.266186	0.226186	0.224531	-0.0801046	0.285468	-0.0927584	0.323744	-0.0272989	0.0154272	0.307863	0.364517	0.170398	0.014743	-0.0903768	0.282543	0.12549	0.154387	0.0796155	-0.0998291	0.170858
GSM2235764	m6Acluster.C	-0.274604	0.256587	0.242373	0.317975	0.233487	0.253478	-0.0699731	0.266124	-0.234694	0.332761	-0.0604427	0.008623	0.209464	0.329124	0.119395	0.0156524	-0.175754	0.270973	0.069403	0.0779272	0.0680684	-0.0324856	0.19717
GSM2235765	m6Acluster.A	-0.107949	0.141552	0.252851	0.287992	0.214632	0.263333	-0.157453	0.27652	-0.170979	0.344815	0.0478672	0.0530222	0.340973	0.352656	0.229897	0.04531	-0.179623	0.310181	0.135444	0.154406	0.127411	-0.0621828	0.0170032
GSM2235766	m6Acluster.C	-0.25554	0.239161	0.155341	0.214672	0.191145	0.257619	-0.158517	0.281367	-0.2923	0.326365	-0.0690473	-0.0580887	0.144147	0.328456	0.150673	0.00058017	-0.15761	0.284109	0.0678333	0.0782352	0.041911	-0.116242	0.0893003
GSM2235767	m6Acluster.A	-0.200163	0.0675499	0.249991	0.229438	0.194615	0.209339	-0.0490868	0.271057	-0.23834	0.339701	-0.00343787	0.185073	0.273933	0.320454	0.181988	0.0272287	-0.161347	0.315648	0.0662083	0.116333	0.115335	-0.137276	0.102292
GSM2235768	m6Acluster.C	-0.000545362	0.389328	0.462167	0.360449	0.275618	0.259078	0.0118677	0.396279	-0.041045	0.388406	0.165647	0.160614	0.501556	0.363446	0.237155	0.108389	-0.0281832	0.31923	0.296472	0.208537	0.188949	-0.0505303	0.123952
GSM2235769	m6Acluster.C	-0.299424	0.216787	0.147241	0.259845	0.220354	0.256622	-0.189133	0.322548	-0.279712	0.351915	0.00345635	-0.0299573	0.24587	0.307868	0.13065	0.0135854	-0.167161	0.290306	0.104941	0.101248	0.0273926	-0.0855025	0.0464456
GSM2235770	m6Acluster.B	-0.1624	0.307573	0.293856	0.314349	0.222677	0.24581	-0.0754356	0.228364	-0.20003	0.371013	0.0168655	0.163192	0.239347	0.334385	0.175921	0.0378983	-0.227403	0.290614	0.066949	0.111584	0.0834321	-0.0690509	0.182063
GSM2235771	m6Acluster.B	-0.0721548	0.289899	0.287867	0.287999	0.243425	0.241048	-0.0772497	0.247923	-0.104682	0.368586	0.0154239	0.124339	0.271969	0.309451	0.168015	0.033271	-0.255944	0.308766	0.106312	0.11332	0.114375	-0.108661	0.171912
GSM2235772	m6Acluster.B	-0.0187857	0.350347	0.275025	0.273115	0.231541	0.251145	-0.0761824	0.278583	-0.0783288	0.355461	0.0321581	0.11758	0.28041	0.311925	0.178191	0.0536539	-0.246082	0.299196	0.113704	0.100762	0.113272	-0.118702	0.199101
GSM2235773	m6Acluster.B	-0.0980212	0.317867	0.287367	0.314943	0.239092	0.247853	-0.128927	0.273865	-0.134708	0.350767	0.0113599	0.086333	0.274598	0.312678	0.186451	0.0618176	-0.269189	0.303765	0.131087	0.0944571	0.108002	-0.0846302	0.16531
GSM2235774	m6Acluster.A	-0.227538	0.229783	0.269883	0.318084	0.236374	0.278377	-0.192989	0.268183	-0.209511	0.347412	0.0294694	0.0876159	0.249668	0.33476	0.170194	0.0660999	-0.248186	0.30964	0.132522	0.104454	0.100326	-0.0716508	0.140338
GSM2235775	m6Acluster.A	-0.237349	0.257246	0.331825	0.340004	0.223316	0.253088	-0.173158	0.280848	-0.207979	0.360048	0.0299278	0.113795	0.296665	0.318288	0.182804	0.0576523	-0.261276	0.309411	0.137047	0.10094	0.112123	-0.0805988	0.178048
GSM2235776	m6Acluster.A	-0.207732	0.253429	0.324812	0.336595	0.226636	0.269182	-0.154384	0.292072	-0.18502	0.361869	0.0278987	0.0890133	0.284891	0.32113	0.18733	0.0515486	-0.276473	0.319286	0.139323	0.100895	0.116004	-0.0604504	0.17086
GSM2235777	m6Acluster.A	-0.130659	0.335329	0.403122	0.341625	0.248207	0.267034	-0.130011	0.312876	-0.106403	0.369731	0.0538949	0.0933825	0.364329	0.339669	0.18827	0.0849307	-0.295904	0.3109	0.195604	0.126331	0.13041	-0.0851674	0.200145
GSM2235778	m6Acluster.B	-0.315597	0.196787	0.18359	0.276867	0.18847	0.265717	-0.180537	0.296226	-0.262352	0.34252	0.00602881	0.00306975	0.247241	0.333641	0.160476	0.0717536	-0.242356	0.284618	0.129161	0.10072	0.0645538	-0.0561771	0.077993
GSM2235779	m6Acluster.B	-0.226569	0.310021	0.393502	0.308447	0.249872	0.224837	-0.195505	0.302217	-0.135353	0.324429	0.0538436	-0.00973951	0.280334	0.347191	0.149345	0.104572	-0.256562	0.275706	0.131253	0.167	0.116829	-0.0812552	0.182041
GSM2235780	m6Acluster.A	-0.152581	0.254676	0.44382	0.304175	0.208025	0.259931	-0.102159	0.301852	-0.172344	0.29475	0.0430062	-0.00863924	0.3034	0.357685	0.173493	0.0370847	-0.159586	0.273679	0.11176	0.142814	0.110723	-0.0131501	0.192451
GSM2235781	m6Acluster.C	-0.188343	0.234877	0.251122	0.269807	0.210811	0.247945	-0.0800035	0.316983	-0.210341	0.347212	-0.00463379	0.0481849	0.258786	0.342507	0.1506	0.0198215	-0.156002	0.309544	0.145771	0.10525	0.0489713	-0.113411	0.0851883
GSM2235782	m6Acluster.A	-0.145416	0.220639	0.285654	0.294032	0.299604	0.223641	-0.175878	0.34406	-0.16052	0.410931	0.0469168	0.0852566	0.356603	0.325615	0.20123	0.0896582	-0.229088	0.294505	0.212389	0.138893	0.128713	-0.178985	0.098324
GSM2235783	m6Acluster.A	-0.0733228	0.198594	0.316434	0.280432	0.209087	0.268413	-0.0871831	0.246981	-0.181066	0.330577	-0.0180956	0.0875971	0.283238	0.344169	0.146975	0.0353233	-0.192472	0.295591	0.0832482	0.12276	0.0984228	-0.0874426	0.103142
GSM2235784	m6Acluster.B	-0.126199	0.388698	0.448397	0.366325	0.20611	0.282689	-0.128936	0.299807	-0.136181	0.348817	0.082316	-0.00377471	0.418997	0.377601	0.171737	0.0878673	-0.174441	0.304941	0.179747	0.152733	0.141237	-0.0316808	0.154407
GSM2235785	m6Acluster.B	-0.00338291	0.421861	0.489172	0.379653	0.235442	0.239061	-0.0859742	0.350818	0.0026848	0.343972	0.15566	0.170031	0.481836	0.385037	0.220578	0.0912181	0.00929412	0.331152	0.251138	0.211325	0.156392	-0.0437919	0.182979
GSM2235786	m6Acluster.A	0.259564	0.265333	0.353662	0.270416	0.227914	0.263003	0.0503184	0.227261	0.0304104	0.346479	0.00460062	0.0600693	0.376618	0.373641	0.169699	0.0437036	-0.205602	0.343589	0.153732	0.184678	0.1763	-0.0802289	0.150193
GSM2235787	m6Acluster.B	-0.121821	0.293354	0.263313	0.265448	0.233565	0.267335	-0.0754766	0.236656	-0.164984	0.343979	-0.00502321	0.0649196	0.221734	0.320064	0.184441	0.0219394	-0.262896	0.313702	0.119155	0.122412	0.116204	-0.0485381	0.151399
GSM2235788	m6Acluster.B	0.123747	0.47206	0.464787	0.309871	0.20489	0.241665	-0.079498	0.328225	0.0453278	0.32569	0.069956	0.0793746	0.433785	0.33783	0.177443	0.0663964	-0.15921	0.296239	0.221668	0.18472	0.132788	-0.0499494	0.178292
GSM2235789	m6Acluster.B	-0.0650172	0.341637	0.390955	0.302567	0.229482	0.252307	-0.0755882	0.291969	-0.129161	0.331732	0.0235959	0.0403942	0.28887	0.337135	0.191704	0.037385	-0.228079	0.277508	0.138028	0.138647	0.115264	0.00828684	0.193184
GSM2235790	m6Acluster.C	0.172386	0.355817	0.307925	0.300075	0.231933	0.268538	-0.0150895	0.278465	0.0343129	0.361126	-0.0368966	0.00759989	0.298255	0.322782	0.139725	0.0129906	-0.199639	0.287988	0.134926	0.149976	0.109547	-0.0667954	0.157744
GSM2235791	m6Acluster.A	-0.142123	0.265263	0.291479	0.262485	0.227799	0.267024	0.0373239	0.263731	-0.147217	0.333846	0.0460184	0.132163	0.341398	0.325827	0.183592	0.0442946	-0.294379	0.329261	0.143874	0.189992	0.176463	-0.085354	0.194022
GSM2235792	m6Acluster.A	-0.262454	0.279473	0.222121	0.278772	0.238206	0.240472	-0.124035	0.332636	-0.195156	0.387349	0.0264447	0.0440139	0.265143	0.304707	0.145263	0.0260287	-0.28347	0.287372	0.201212	0.138716	0.108739	-0.088333	0.21562
GSM2235793	m6Acluster.A	-0.0844141	0.220042	0.283188	0.282441	0.212248	0.245181	0.0282921	0.35376	-0.155018	0.365282	0.0841569	0.185642	0.346852	0.35632	0.194029	0.0760866	-0.165418	0.35885	0.191206	0.180852	0.156594	-0.112977	0.201092
GSM2235794	m6Acluster.B	-0.144001	0.334371	0.366182	0.279806	0.228884	0.216008	-0.102049	0.345434	-0.15776	0.347498	0.0579636	0.0815608	0.343142	0.314245	0.181237	0.0254969	-0.188929	0.277445	0.18891	0.148037	0.127066	-0.0969005	0.183406
GSM2235795	m6Acluster.A	-0.307579	0.198991	0.173653	0.306138	0.244254	0.232713	-0.0631647	0.340022	-0.244868	0.37441	0.0826676	0.073389	0.304687	0.343206	0.155733	0.087439	-0.117356	0.355786	0.23866	0.107432	0.101289	-0.101608	0.145644
GSM2235796	m6Acluster.A	-0.149666	0.24078	0.310162	0.314784	0.206339	0.237351	0.0261366	0.331055	-0.186122	0.344407	0.102311	0.210672	0.391533	0.348078	0.15224	0.0810942	-0.0767138	0.353383	0.182119	0.169527	0.152932	-0.105979	0.142565
GSM2235797	m6Acluster.B	-0.268847	0.289929	0.342631	0.295233	0.249342	0.242529	-0.197311	0.292552	-0.172163	0.311427	-0.0231471	0.0289907	0.295804	0.341889	0.144839	0.0906512	-0.229363	0.229959	0.116409	0.155522	0.0948155	0.0270888	0.127847
GSM2235798	m6Acluster.C	-0.280494	0.219539	0.208257	0.247299	0.237774	0.216541	-0.172119	0.271119	-0.208129	0.337651	0.0166591	0.0118418	0.234026	0.335303	0.156527	0.0254073	-0.1536	0.268908	0.111876	0.0811213	0.0538328	-0.0589368	0.115362
GSM2235799	m6Acluster.A	-0.219803	0.312142	0.219855	0.264164	0.262627	0.237341	-0.156077	0.287118	-0.201152	0.327322	0.0405759	0.0205194	0.28843	0.328282	0.117369	0.0377664	-0.23905	0.260492	0.119905	0.111506	0.0746169	-0.0507383	0.132473
GSM2235800	m6Acluster.A	0.0992126	0.295879	0.471448	0.32648	0.224809	0.270526	0.00801598	0.269712	-0.0695413	0.323064	0.0345102	0.0580547	0.380746	0.331578	0.184848	0.0460091	-0.253623	0.341857	0.171474	0.16288	0.156242	-0.077773	0.158121
GSM2235801	m6Acluster.A	0.116606	0.246948	0.374747	0.286701	0.238219	0.273369	-7.86e-06	0.273492	-0.0593044	0.369756	0.00496704	0.0895529	0.356171	0.372834	0.152442	0.0130043	-0.212882	0.337831	0.110878	0.133535	0.130688	-0.070512	0.149684
GSM2235802	m6Acluster.B	-0.0333829	0.421466	0.393168	0.288385	0.256575	0.193702	-0.0210469	0.372513	-0.0241495	0.362079	0.0458243	0.039868	0.380797	0.306305	0.158021	0.0637432	-0.252898	0.280505	0.25937	0.163372	0.109666	-0.0091738	0.191831
GSM2235803	m6Acluster.B	-0.125545	0.35211	0.3062	0.261347	0.199504	0.280294	-0.109862	0.281729	-0.133843	0.285679	0.024119	-0.0475936	0.217217	0.330028	0.16299	0.0176824	-0.198001	0.257028	0.154087	0.150283	0.111775	-0.079119	0.176152
GSM2235804	m6Acluster.A	-0.237525	0.182998	0.300524	0.323514	0.195693	0.282381	-0.0961386	0.292897	-0.20915	0.367676	0.0516016	0.0612437	0.270455	0.322501	0.168693	0.0238005	-0.181143	0.314322	0.129647	0.145268	0.127676	-0.0363984	0.182535
GSM2235805	m6Acluster.A	-0.256796	0.137817	0.155474	0.263953	0.193159	0.251297	-0.0406688	0.249804	-0.231277	0.367247	-0.0339578	0.0794276	0.175082	0.316581	0.207665	0.0159464	-0.241079	0.315043	0.0687301	0.130962	0.115311	-0.0856261	0.192507
GSM2235806	m6Acluster.C	-0.299003	0.214328	0.178551	0.291618	0.225554	0.281509	-0.0990363	0.258982	-0.272072	0.338158	-0.0155024	-0.0845398	0.219988	0.323411	0.0879182	-0.000486658	-0.237277	0.281402	0.037207	0.0916699	0.0555773	-0.0492198	0.159936
GSM2235807	m6Acluster.B	-0.245581	0.24482	0.20614	0.258226	0.22569	0.258865	-0.113738	0.279887	-0.245444	0.338696	-0.0795556	0.0683972	0.192466	0.314473	0.143117	0.0108661	-0.241955	0.27322	0.0712946	0.0582748	0.100003	-0.0930095	0.172751
GSM2235808	m6Acluster.C	-0.0730319	0.329193	0.316158	0.316588	0.215489	0.275654	-0.0860808	0.280754	-0.105021	0.369782	-0.0311111	-0.0192361	0.296227	0.343362	0.209965	0.0311391	-0.141586	0.275742	0.223108	0.136968	0.0905921	-0.093349	0.155571
GSM2235809	m6Acluster.B	-0.0710973	0.346191	0.448533	0.372429	0.1986	0.261311	-0.0489181	0.290393	-0.0873636	0.382126	0.0516094	0.0459645	0.369627	0.33705	0.167143	0.0466474	0.00376989	0.329163	0.163213	0.15375	0.116756	-0.094348	0.213238
GSM2235810	m6Acluster.B	-0.296894	0.289526	0.170631	0.301553	0.189107	0.245938	-0.166548	0.305422	-0.203472	0.317013	-0.0119057	0.0664895	0.218197	0.331264	0.172281	0.0432723	-0.187595	0.234659	0.12868	0.0933442	0.0814722	-0.0450472	0.177508
GSM2235811	m6Acluster.B	-0.162444	0.325367	0.279715	0.294965	0.217509	0.180167	-0.0779712	0.325111	-0.174177	0.322055	0.0541691	0.066815	0.336038	0.324486	0.172006	0.0300311	-0.204512	0.260959	0.183876	0.125057	0.0890589	-0.0570824	0.18278
GSM2235812	m6Acluster.C	-0.317168	0.244374	0.24552	0.260224	0.200311	0.24492	-0.185391	0.319109	-0.22704	0.325679	-0.043681	-0.097909	0.133629	0.324518	0.121014	0.0244159	-0.276846	0.246452	0.067623	0.102125	0.0721215	-0.0485338	0.145651
GSM2235813	m6Acluster.C	-0.00845459	0.302755	0.298847	0.306023	0.236942	0.287684	-0.0253189	0.259093	-0.13678	0.356852	-0.0109172	0.0443674	0.317391	0.37332	0.158308	0.0236647	-0.160758	0.270209	0.144496	0.105659	0.110928	-0.0849355	0.133305
GSM2235814	m6Acluster.A	0.202407	0.390241	0.412706	0.310899	0.230282	0.228427	0.00486083	0.269646	0.0204244	0.355439	0.0520139	0.0633934	0.338263	0.338869	0.172131	0.0681007	-0.324336	0.263479	0.195983	0.154562	0.125789	-0.0500593	0.163544
GSM2235815	m6Acluster.C	-0.205109	0.282457	0.27091	0.259036	0.196434	0.235844	-0.098354	0.303431	-0.22871	0.283358	0.0103287	0.0200886	0.230837	0.317224	0.104715	0.0270032	-0.165354	0.264324	0.14023	0.121807	0.0648052	-0.0658734	0.136742
GSM2235816	m6Acluster.A	0.0320951	0.293048	0.366034	0.33055	0.216349	0.22543	-0.0633698	0.292071	-0.0877382	0.366103	0.0440441	0.0681699	0.371272	0.365825	0.179619	0.040355	-0.0454859	0.303682	0.111871	0.129784	0.13238	-0.071081	0.188857
GSM2235817	m6Acluster.A	-0.272176	0.220508	0.268191	0.288789	0.200396	0.266504	-0.151964	0.284093	-0.218327	0.349014	0.0679464	-0.0734375	0.312471	0.329906	0.163465	0.00707791	-0.00184002	0.289734	0.0845252	0.0894293	0.0489375	0.00844813	0.111443
GSM2235818	m6Acluster.B	-0.157226	0.382629	0.428301	0.37052	0.26547	0.221668	-0.0301524	0.364312	-0.0946725	0.37057	0.0847604	0.0826542	0.449165	0.359089	0.199577	0.115899	-0.0946045	0.292712	0.235705	0.17689	0.127919	-0.00380318	0.229123
GSM2235819	m6Acluster.A	-0.26862	0.199638	0.166623	0.306545	0.205177	0.272711	-0.183819	0.268788	-0.232172	0.321418	0.0289251	-0.00128971	0.259187	0.323995	0.157896	0.0556784	-0.224428	0.281424	0.146757	0.0815928	0.0936078	-0.102697	0.100781
GSM2235820	m6Acluster.A	0.186991	0.255979	0.373758	0.294068	0.220069	0.236036	-0.0167247	0.273041	-0.0146406	0.335677	0.076388	0.0796801	0.40138	0.349223	0.174544	0.0708372	-0.228226	0.30792	0.180386	0.181508	0.163402	-0.102948	0.118272
GSM2235821	m6Acluster.B	-0.114613	0.324218	0.432556	0.313862	0.260514	0.212328	-0.131231	0.316716	-0.147815	0.3421	0.0346985	0.0023635	0.35667	0.340172	0.156768	0.0336825	-0.250587	0.286084	0.145814	0.134963	0.0781805	-0.0613131	0.128683
GSM2235822	m6Acluster.C	-0.324584	0.22568	0.184638	0.2572	0.241793	0.247695	-0.159529	0.281981	-0.247361	0.362266	-0.0348767	-0.0435595	0.242637	0.359919	0.128392	0.0468305	-0.233786	0.276846	0.142437	0.110628	0.0448983	-0.146164	0.0606639
GSM2235823	m6Acluster.A	0.0830524	0.247839	0.388793	0.314162	0.240704	0.26157	0.020103	0.251212	-0.0898268	0.34499	0.024234	0.0878312	0.355311	0.362306	0.183951	0.0540538	-0.273331	0.332402	0.149136	0.157845	0.155298	-0.0653895	0.145038
GSM2235824	m6Acluster.A	0.0674611	0.185365	0.362719	0.268729	0.227855	0.251731	-0.0454803	0.235464	-0.0865577	0.34929	0.0235992	0.0538746	0.310332	0.339239	0.191799	0.0314914	-0.280256	0.353193	0.140829	0.147055	0.14103	-0.092145	0.13762
GSM2235825	m6Acluster.A	-0.259168	0.207292	0.188595	0.267792	0.231899	0.298292	-0.0475854	0.289706	-0.216094	0.349406	0.0433658	0.144382	0.31423	0.330397	0.190387	0.0691738	-0.191385	0.302593	0.130271	0.123905	0.103146	-0.092893	0.160388
GSM2235826	m6Acluster.A	-0.282702	0.261582	0.214138	0.293443	0.254768	0.228981	-0.170401	0.307454	-0.195923	0.310955	-0.00167899	0.00254245	0.214535	0.304026	0.167417	0.0998076	-0.220279	0.296121	0.137981	0.0930109	0.0729882	-0.125504	0.174194
GSM2235827	m6Acluster.A	-0.015704	0.164248	0.328165	0.272877	0.222403	0.227934	-0.111132	0.260806	-0.139248	0.332383	0.019572	0.133716	0.32156	0.329746	0.173621	0.0528309	-0.302473	0.332814	0.100361	0.130598	0.13264	-0.114488	0.140643
GSM2235828	m6Acluster.B	-0.108594	0.412211	0.457795	0.35512	0.285412	0.241493	0.0618777	0.40066	-0.00642646	0.371347	0.198941	0.0875315	0.535462	0.345754	0.27492	0.129596	-0.195721	0.33479	0.339126	0.228947	0.212704	0.00678847	0.251168
GSM2235829	m6Acluster.B	-0.0536091	0.357783	0.356483	0.322646	0.215145	0.245566	-0.108308	0.297726	-0.0839441	0.333133	0.0194321	-0.0600985	0.323979	0.36123	0.184099	0.0709201	-0.165599	0.250893	0.164526	0.130174	0.100249	-0.0726283	0.176557
GSM2235830	m6Acluster.B	-0.331624	0.196902	0.127118	0.235711	0.216517	0.24088	-0.220953	0.221937	-0.169325	0.317658	-0.0732411	-0.0424656	0.0718538	0.317297	0.160089	0.002804	-0.146315	0.250736	0.0318965	0.0617355	0.0571462	-0.051227	0.0943823
GSM2235831	m6Acluster.C	-0.21487	0.237502	0.173332	0.27719	0.197967	0.230649	-0.205616	0.288055	-0.171192	0.3317	-0.0422637	0.0026957	0.156965	0.30479	0.127606	0.0180736	-0.180832	0.281824	0.0872798	0.0912001	0.0659062	-0.0793035	0.162488
GSM2235837	m6Acluster.C	-0.026758	0.310121	0.34087	0.286882	0.243923	0.272715	-0.105679	0.320137	-0.0787859	0.330252	0.0162191	0.0704383	0.32346	0.34259	0.198568	0.107926	-0.113741	0.271086	0.236608	0.199866	0.082907	-0.0332781	0.162996
GSM2235838	m6Acluster.C	-0.163765	0.225049	0.236123	0.271101	0.188166	0.305617	-0.113201	0.240475	-0.203347	0.362898	-0.110533	-0.0488246	0.176876	0.332723	0.180852	0.0362501	-0.179147	0.309508	0.0487931	0.088956	0.0903598	-0.134391	0.123105
GSM2235839	m6Acluster.C	-0.0453098	0.295347	0.256707	0.264198	0.205925	0.262485	-0.132717	0.27007	-0.107639	0.294946	-0.0760574	-0.0726965	0.190231	0.348457	0.185671	0.0782644	-0.206563	0.256797	0.142779	0.0821456	0.121265	-0.0426104	0.161271
GSM2235840	m6Acluster.C	-0.304209	0.259289	0.185673	0.283494	0.221176	0.236153	-0.149146	0.316208	-0.257008	0.295692	-0.0224708	-0.00889389	0.260867	0.364733	0.100665	0.0283347	-0.178859	0.299266	0.117197	0.0847811	0.0397426	-0.0530063	0.161776
GSM2235841	m6Acluster.A	-0.14379	0.27072	0.293773	0.300672	0.251711	0.246446	-0.000933411	0.333412	-0.109148	0.384166	0.113715	0.110913	0.395069	0.357573	0.17356	0.0780674	-0.0199975	0.313821	0.212261	0.157514	0.122955	-0.0178455	0.19415
GSM2235842	m6Acluster.C	-0.321096	0.221725	0.14722	0.225519	0.235436	0.203586	-0.128481	0.314182	-0.207267	0.347412	-0.00854765	0.0434217	0.145921	0.286265	0.153746	0.0325034	-0.161703	0.296634	0.0840095	0.115825	0.0617516	-0.096899	0.159733
GSM2235843	m6Acluster.A	-0.0636865	0.259764	0.294563	0.311737	0.244295	0.197357	-0.0753981	0.34842	-0.119466	0.34934	0.0831853	0.164526	0.393755	0.359128	0.16766	0.0695583	-0.163191	0.299	0.200011	0.173653	0.108904	-0.00825871	0.124362
GSM2235844	m6Acluster.B	-0.152589	0.328633	0.369319	0.326922	0.219934	0.244287	-0.150387	0.310913	-0.115246	0.343012	0.00134409	-0.0698877	0.310575	0.344088	0.185196	0.0778141	-0.170417	0.29553	0.129562	0.125714	0.101249	-0.0199529	0.124952
GSM2235845	m6Acluster.C	-0.149352	0.31473	0.338581	0.358382	0.213809	0.271416	-0.143097	0.304677	-0.132853	0.356428	-0.0346372	-0.0370729	0.321114	0.3499	0.198538	0.0764956	-0.171493	0.29545	0.132963	0.14573	0.0817017	-0.0263871	0.144979
GSM2235846	m6Acluster.C	-0.219295	0.223555	0.231919	0.273608	0.193614	0.179834	-0.0961399	0.276448	-0.200483	0.335923	0.0399629	0.0494229	0.246767	0.335192	0.148347	0.044683	-0.182449	0.316585	0.135931	0.151748	0.107385	-0.0126851	0.135719
GSM2235847	m6Acluster.B	0.00275863	0.394811	0.485035	0.341798	0.228003	0.252846	-0.087171	0.362999	-0.084651	0.352974	0.105021	0.0700532	0.47288	0.348596	0.211214	0.0791603	-0.122152	0.318575	0.211059	0.179565	0.173338	-0.0740759	0.212134
GSM2235848	m6Acluster.A	-0.0131398	0.170527	0.31686	0.256815	0.21082	0.202008	-0.00931295	0.252303	-0.130691	0.313294	0.0278417	0.0954915	0.318556	0.344125	0.191728	0.046982	-0.318749	0.325788	0.107328	0.169734	0.1434	-0.0943303	0.12709
GSM2235849	m6Acluster.A	0.0264671	0.307184	0.315892	0.252651	0.25437	0.23901	-0.0407722	0.303307	-0.144015	0.339768	0.0252333	0.0705431	0.289507	0.337651	0.153754	0.0417375	-0.217043	0.288385	0.135169	0.131394	0.117044	-0.103786	0.155532
GSM2235850	m6Acluster.A	0.174424	0.270143	0.344964	0.284065	0.242253	0.260877	0.0552104	0.303753	-0.0249478	0.353956	0.0282284	0.0999579	0.38588	0.356724	0.172569	0.0522955	-0.229834	0.309135	0.178924	0.142786	0.120253	-0.100449	0.12876
GSM2235851	m6Acluster.A	-0.0448358	0.252122	0.263285	0.2946	0.253471	0.213022	-0.156491	0.281324	-0.143491	0.310855	0.0262896	0.00447491	0.310033	0.393721	0.15304	0.00329533	-0.0554003	0.281279	0.151146	0.0689147	0.0921445	-0.042436	0.168707
GSM2235852	m6Acluster.B	0.396525	0.37104	0.47506	0.321326	0.226046	0.288436	0.0809535	0.264895	0.209367	0.315553	0.0394151	-0.0765385	0.372544	0.392502	0.155952	0.0716502	-0.211674	0.329148	0.235472	0.151911	0.184745	-0.0847336	0.129389
GSM2235853	m6Acluster.A	0.0754901	0.375718	0.454042	0.342447	0.252626	0.279995	-0.0769851	0.30569	-0.0682136	0.335909	0.063655	0.113133	0.384183	0.373368	0.177512	0.0416776	-0.212245	0.297716	0.122389	0.130573	0.145912	-0.0398414	0.187781
GSM2235854	m6Acluster.A	-0.0561572	0.340768	0.355062	0.28447	0.248441	0.276475	-0.0417453	0.332521	-0.153252	0.360408	0.0955243	0.0628499	0.316668	0.345298	0.161023	0.0441472	-0.347875	0.313109	0.172479	0.163769	0.104726	-0.047973	0.171368
GSM2235855	m6Acluster.B	0.425244	0.447876	0.536245	0.329253	0.267081	0.254315	0.00560674	0.335742	0.216386	0.318422	0.0821658	0.116817	0.535719	0.408295	0.187543	0.0535298	-0.243238	0.322415	0.2645	0.220122	0.159067	-0.0877055	0.189025
GSM2235862	m6Acluster.A	-0.0386669	0.392938	0.490072	0.329287	0.203245	0.277081	-0.0565634	0.328483	-0.0986339	0.328125	0.0838886	0.0652411	0.440793	0.341436	0.189651	0.0908974	-0.134347	0.283215	0.204279	0.175569	0.187482	-0.0744594	0.182345
GSM2235863	m6Acluster.A	-0.228079	0.167743	0.242768	0.270988	0.216438	0.263554	-0.083316	0.309132	-0.186687	0.36379	0.0885458	0.0769314	0.367316	0.337348	0.174705	0.0425992	-0.170964	0.29979	0.124537	0.15559	0.125476	-0.0833295	0.140669
GSM2235864	m6Acluster.A	-0.103344	0.190572	0.284551	0.274098	0.232942	0.257134	-0.141418	0.282265	-0.187662	0.326623	0.0216539	0.0285766	0.282904	0.327603	0.123415	0.0377746	-0.19251	0.278268	0.0622859	0.0959398	0.11131	-0.0794869	0.160772
GSM2235865	m6Acluster.B	-0.257076	0.211139	0.19142	0.247418	0.18592	0.240344	-0.2217	0.315562	-0.261293	0.34766	0.0261927	0.0276249	0.222926	0.326408	0.107643	0.00807326	-0.0526013	0.273201	0.0645797	0.074142	0.0735039	-0.0682255	0.142908
GSM2235866	m6Acluster.A	-0.180661	0.253512	0.305984	0.342895	0.228928	0.291834	-0.164996	0.337696	-0.142773	0.374833	0.138163	0.0901474	0.44717	0.333424	0.208042	0.0865036	-0.0629877	0.307623	0.241792	0.16458	0.148888	-0.063361	0.155144
GSM2235867	m6Acluster.A	-0.162642	0.271434	0.400177	0.333221	0.249455	0.227916	-0.0988856	0.352522	-0.117766	0.368276	0.116458	0.117205	0.439635	0.355924	0.187194	0.102135	-0.127457	0.303384	0.216234	0.159977	0.138895	-0.0615017	0.182878
GSM2235878	m6Acluster.C	-0.0547428	0.283156	0.360978	0.324214	0.220567	0.280271	-0.10154	0.325079	-0.148237	0.355496	0.0359663	0.0877283	0.348411	0.422796	0.162625	0.0836754	-0.0355085	0.328241	0.162807	0.138672	0.0752687	-0.0782481	0.141455
GSM2235879	m6Acluster.A	-0.266332	0.296345	0.322806	0.307782	0.246139	0.241465	-0.143416	0.39391	-0.14597	0.386974	0.0826386	0.105259	0.377941	0.335661	0.212364	0.121716	-0.223447	0.314961	0.250021	0.147038	0.141053	-0.0901504	0.159745
GSM2235880	m6Acluster.A	0.0699238	0.290191	0.399331	0.273607	0.246115	0.266791	-0.04141	0.318877	-0.0967851	0.303959	0.0481442	0.0770291	0.374399	0.349731	0.151501	0.0491589	-0.203324	0.302872	0.120868	0.143506	0.142173	-0.0507864	0.100899
GSM2235881	m6Acluster.A	0.0126893	0.195632	0.252717	0.298163	0.223843	0.260564	-0.0433523	0.308495	-0.141874	0.3684	0.0367609	0.0856504	0.363806	0.361314	0.128815	0.0458895	-0.0774626	0.298504	0.139959	0.140658	0.0906971	-0.0436181	0.124474
GSM2235882	m6Acluster.A	0.183323	0.328093	0.419766	0.329484	0.247328	0.268925	0.0164827	0.299153	-0.030611	0.349401	0.0844808	0.131779	0.401711	0.372134	0.170434	0.0653406	-0.118141	0.315386	0.177245	0.168893	0.133476	-0.0427264	0.140221
GSM2235883	m6Acluster.A	-0.00437526	0.283569	0.341478	0.291235	0.249313	0.254904	-0.0222959	0.285865	-0.136103	0.355149	0.0571095	0.154774	0.349533	0.342934	0.156451	0.0609571	-0.239844	0.322072	0.160104	0.146463	0.15416	-0.0583456	0.18693
GSM2235884	m6Acluster.A	0.203259	0.283641	0.407487	0.327905	0.238291	0.291951	0.0635457	0.296346	0.0100837	0.355307	0.0957105	0.192665	0.461962	0.385672	0.198875	0.0672429	-0.173708	0.364651	0.216965	0.221104	0.189877	-0.125489	0.174349
GSM2235885	m6Acluster.B	-0.126731	0.339099	0.466683	0.38057	0.254863	0.250001	-0.0701947	0.371215	-0.105614	0.410071	0.105049	0.0626919	0.472138	0.368715	0.236777	0.15351	-0.152898	0.332187	0.308053	0.21425	0.202461	-0.0400693	0.193644
GSM2235886	m6Acluster.A	-0.276602	0.253638	0.165903	0.294819	0.236922	0.28826	-0.13589	0.360817	-0.239056	0.354152	0.0322767	0.0661724	0.266757	0.313935	0.173274	0.103389	-0.215655	0.3274	0.198906	0.123571	0.118667	-0.130307	0.183222
GSM2235887	m6Acluster.C	-0.303272	0.1818	0.175496	0.232858	0.241854	0.2297	-0.1978	0.27152	-0.264451	0.347276	0.0039544	-0.0552304	0.19378	0.335951	0.146304	0.0636083	-0.17096	0.292835	0.0889362	0.144306	0.0502447	-0.128573	0.138544
GSM2235888	m6Acluster.A	0.0550211	0.247365	0.314613	0.271877	0.23665	0.291413	-0.0147192	0.252035	-0.091305	0.322606	-0.0469295	0.0148274	0.274407	0.363315	0.12686	0.011263	-0.203142	0.308744	0.0368091	0.093706	0.115753	-0.0598877	0.144362
GSM2235889	m6Acluster.C	0.0486987	0.254319	0.271563	0.293677	0.224797	0.31513	-0.0390164	0.215394	-0.0842384	0.341571	-0.0381297	0.01905	0.262317	0.388922	0.149582	0.00543751	-0.0942138	0.324474	0.0568975	0.0934008	0.0839627	-0.0720177	0.0771088
GSM2235899	m6Acluster.A	0.000380196	0.285281	0.366029	0.301009	0.233268	0.28506	-0.0216723	0.324673	-0.0693954	0.378024	0.0596039	0.106901	0.374532	0.342837	0.169355	0.0321407	-0.113913	0.326196	0.145304	0.172041	0.131566	-0.0853625	0.170209
GSM2235900	m6Acluster.A	0.0230006	0.338224	0.386562	0.306334	0.27279	0.271123	-0.0659551	0.364974	-0.0251906	0.372571	0.143155	0.16023	0.457204	0.384877	0.176393	0.0876807	-0.142746	0.290212	0.194224	0.219765	0.169269	-0.0483035	0.166528
GSM2235901	m6Acluster.A	-0.316301	0.209583	0.14766	0.260984	0.236363	0.27423	-0.130359	0.313476	-0.227239	0.377585	0.00429955	0.0582081	0.241715	0.337608	0.161929	0.0601185	-0.201249	0.305706	0.151734	0.111099	0.0732069	-0.138172	0.105733
GSM2235902	m6Acluster.A	-0.120718	0.101708	0.342978	0.252661	0.208151	0.202366	-0.148581	0.257123	-0.142591	0.351311	0.0694148	0.0539882	0.326427	0.319977	0.173046	0.0594575	-0.289952	0.301345	0.119044	0.149954	0.135077	-0.103245	0.149034
GSM2235903	m6Acluster.A	-0.321606	0.207066	0.188002	0.275271	0.227673	0.278702	-0.128725	0.305299	-0.230336	0.298593	0.0192244	0.00906046	0.214225	0.321843	0.157837	0.0526172	-0.25581	0.335811	0.142363	0.137839	0.0851954	-0.0882116	0.0770715
GSM2235904	m6Acluster.A	-0.341286	0.151096	0.106646	0.258061	0.21688	0.252888	-0.171283	0.274516	-0.262944	0.374154	-0.00517841	0.0639852	0.214578	0.303547	0.145112	0.0649706	-0.134826	0.330535	0.0747406	0.123964	0.108094	-0.103298	0.137789
GSM2235905	m6Acluster.A	0.192647	0.311562	0.422587	0.325121	0.256215	0.271929	-0.0706295	0.321706	0.0320096	0.395931	0.117086	0.106173	0.505452	0.365677	0.185575	0.0981401	-0.167023	0.344227	0.239939	0.209542	0.188208	-0.0828364	0.186693
GSM2235906	m6Acluster.A	-0.245892	0.239551	0.225777	0.32309	0.255326	0.258754	-0.118582	0.33922	-0.20397	0.361007	0.0124616	0.0413696	0.302908	0.328588	0.140193	0.072202	-0.12142	0.309794	0.142639	0.136224	0.0891762	-0.0278046	0.156873
GSM2235907	m6Acluster.B	-0.25957	0.342695	0.344035	0.316674	0.239433	0.229728	-0.177909	0.357314	-0.146194	0.352615	0.0429766	0.0394703	0.31767	0.338791	0.16902	0.106651	-0.202398	0.272427	0.188425	0.13064	0.135315	-0.0323952	0.123144
GSM2235908	m6Acluster.A	-0.174846	0.178918	0.262441	0.251447	0.220641	0.275886	-0.111106	0.279836	-0.191066	0.311155	-0.00744347	0.00206279	0.240149	0.331868	0.145148	0.0613249	-0.223541	0.294261	0.0646431	0.0937623	0.112849	-0.0808259	0.170964
GSM2235909	m6Acluster.C	-0.162106	0.239512	0.309766	0.263058	0.187438	0.29058	-0.105562	0.287395	-0.184471	0.298635	0.010168	-0.0242256	0.300055	0.364374	0.127431	0.0454611	-0.185105	0.305505	0.11601	0.123953	0.0535657	-0.0899971	0.027545
GSM2235910	m6Acluster.A	-0.0345275	0.386582	0.402693	0.348401	0.236311	0.260804	-0.0382483	0.364515	-0.0254781	0.376331	0.108854	0.115387	0.472029	0.367568	0.225844	0.12608	-0.190849	0.349453	0.30993	0.202085	0.143727	-0.0876718	0.204631
GSM2235921	m6Acluster.C	-0.162176	0.228637	0.168432	0.218105	0.212579	0.262368	-0.0294754	0.244826	-0.190897	0.332208	-0.081367	-0.0270145	0.117186	0.314517	0.0740069	0.0156413	-0.240627	0.293988	0.0612776	0.0901911	0.0323708	-0.105467	0.0681667
GSM2235922	m6Acluster.C	-0.233418	0.295661	0.389758	0.322099	0.220734	0.287128	-0.109347	0.290892	-0.168679	0.367479	0.0746285	-0.0212708	0.332172	0.356637	0.179194	0.0593104	-0.229402	0.322543	0.146247	0.167156	0.0813687	-0.088545	0.0611235
GSM2235923	m6Acluster.A	-0.306007	0.115142	0.215766	0.251929	0.226138	0.249123	-0.134926	0.25437	-0.252259	0.299469	-0.0932407	-0.0032429	0.233771	0.329169	0.113256	0.00969949	-0.247343	0.272355	-0.0144498	0.0830073	0.0809634	-0.0832211	0.0980694
GSM2235924	m6Acluster.B	-0.253041	0.206351	0.198454	0.264725	0.241765	0.284374	-0.238642	0.269969	-0.223029	0.321502	-0.0117405	-0.011147	0.211001	0.327205	0.157873	0.0340586	-0.269116	0.25709	0.0357011	0.0867714	0.103437	-0.0670234	0.130042
GSM2235925	m6Acluster.B	0.0200188	0.263547	0.292303	0.279264	0.207551	0.275655	-0.0082832	0.227437	-0.0804881	0.309391	-0.0407531	-0.00452078	0.267794	0.371452	0.129194	0.0116573	-0.216097	0.292835	0.0838626	0.13867	0.0980589	-0.100664	0.107617
GSM2235926	m6Acluster.B	0.00632192	0.389514	0.46554	0.315972	0.264109	0.27603	-0.00644541	0.341336	-0.0328109	0.374575	0.126876	0.0689227	0.460714	0.357543	0.221245	0.0594137	-0.251791	0.334013	0.226162	0.205586	0.151989	-0.0757372	0.197746
GSM2235927	m6Acluster.C	-0.39098	0.176956	0.11197	0.232594	0.232603	0.260104	-0.218386	0.295945	-0.24434	0.313155	-0.0768262	-0.103013	0.0938034	0.304903	0.104288	0.0427695	-0.279864	0.228728	-0.0105705	0.0436229	0.0361102	-0.0599877	0.126452
GSM2235928	m6Acluster.C	-0.292269	0.265675	0.167513	0.237007	0.219383	0.250015	-0.246135	0.315969	-0.239512	0.359762	-0.00756835	0.0283805	0.171251	0.319932	0.165236	0.0638257	-0.155006	0.279623	0.0721572	0.124127	0.0621742	-0.0748638	0.184197
GSM2235929	m6Acluster.A	-0.029946	0.142696	0.331161	0.31746	0.229216	0.235595	-0.0456999	0.339701	-0.143898	0.39972	0.0918017	0.176024	0.430853	0.336879	0.171616	0.1034	-0.244835	0.37768	0.182701	0.174254	0.167819	-0.144086	0.164582
GSM2235930	m6Acluster.A	-0.268987	0.184705	0.196837	0.312633	0.19537	0.288431	-0.096657	0.27472	-0.231624	0.339127	0.0374442	0.0816317	0.26034	0.319544	0.154789	0.0394036	-0.260567	0.295637	0.108059	0.151322	0.0796431	-0.0915417	0.162137
GSM2235931	m6Acluster.B	-0.00755831	0.314825	0.382601	0.329563	0.242303	0.247447	-0.0467201	0.269934	-0.0905342	0.377713	0.0187572	-0.0137103	0.33627	0.350757	0.141286	0.0206123	-0.215778	0.273318	0.103666	0.112257	0.085849	-0.114321	0.160297
GSM2235932	m6Acluster.B	-0.242072	0.310054	0.305886	0.361609	0.211879	0.302854	-0.129507	0.219566	-0.232421	0.333798	-0.000457452	-0.0625068	0.236403	0.380277	0.140339	0.0526213	-0.209322	0.267837	0.0473549	0.0605844	0.0918387	-0.0617788	0.136658
GSM2235933	m6Acluster.A	0.122535	0.194405	0.34347	0.316805	0.221053	0.277664	0.060462	0.32428	-0.00127357	0.369251	0.0914936	0.266573	0.456343	0.348903	0.231052	0.128573	-0.179335	0.346149	0.272737	0.19875	0.198621	-0.111418	0.149076
GSM2235934	m6Acluster.B	0.128682	0.44049	0.528377	0.365519	0.269002	0.257949	0.0146714	0.392686	0.0701827	0.386576	0.179359	0.10614	0.530307	0.360717	0.236743	0.0916797	-0.127973	0.328666	0.297051	0.240356	0.210688	-0.0389206	0.211114
GSM2235935	m6Acluster.A	-0.0721488	0.200667	0.35258	0.290708	0.252908	0.25408	0.00768081	0.297618	-0.142266	0.341046	0.053253	0.0389176	0.334224	0.32868	0.154827	0.0441745	-0.21199	0.26391	0.102728	0.145932	0.127193	-0.0670743	0.0948158
GSM2235936	m6Acluster.B	-0.179064	0.175111	0.229772	0.248115	0.212459	0.239235	-0.0928168	0.28519	-0.216173	0.325286	0.0604475	0.0516824	0.305562	0.316129	0.118625	-0.0140914	-0.130223	0.283531	0.0959665	0.0856881	0.079524	-0.0904165	0.0985416
GSM2235937	m6Acluster.B	-0.251744	0.226599	0.203254	0.303977	0.206232	0.251943	-0.00909929	0.293194	-0.195075	0.366457	0.0587955	0.0374201	0.277524	0.335749	0.117421	0.0123375	-0.0472171	0.292608	0.172354	0.104808	0.0723612	-0.0422961	0.130344
GSM2235938	m6Acluster.B	-0.25486	0.312818	0.245743	0.253285	0.249936	0.220455	-0.0769354	0.287566	-0.232139	0.298581	0.00789274	0.0432212	0.272394	0.306075	0.0994989	0.0130678	-0.1526	0.234417	0.127777	0.0862737	0.015178	-0.128216	0.182416
GSM2235939	m6Acluster.A	-0.0813681	0.145186	0.331049	0.251366	0.240162	0.253708	-0.0332967	0.262862	-0.20752	0.327625	0.0209478	0.0515811	0.271993	0.337339	0.155235	-0.00882656	-0.248674	0.310023	0.0905157	0.178734	0.101731	-0.0848688	0.0844204
GSM2235940	m6Acluster.A	-0.049092	0.302952	0.459022	0.278264	0.223762	0.223514	-0.0501491	0.329169	-0.127943	0.336112	0.0962126	0.0934409	0.416504	0.340023	0.145156	0.0564548	-0.18091	0.296207	0.166038	0.151509	0.147082	-0.0662911	0.158436
GSM2235941	m6Acluster.A	-0.106542	0.414867	0.447913	0.359582	0.227414	0.251883	-0.0671913	0.368583	-0.0533479	0.366254	0.141627	0.0841356	0.445596	0.343317	0.211597	0.0858086	-0.00289435	0.308662	0.243646	0.190499	0.17884	-0.00126036	0.211498
GSM2235942	m6Acluster.B	-0.205613	0.217363	0.286823	0.268122	0.245326	0.252971	-0.134344	0.295796	-0.227597	0.321102	-0.0130325	0.0033913	0.24876	0.335033	0.122252	-0.015902	-0.170587	0.246864	0.105946	0.0824844	0.0507751	-0.0659365	0.129375
GSM2235943	m6Acluster.C	-0.0729668	0.369348	0.482976	0.308322	0.217785	0.253113	-0.0416413	0.354723	-0.0834757	0.333526	0.116787	0.134877	0.449694	0.337918	0.1842	0.100166	-0.246109	0.283768	0.236688	0.232607	0.121652	-0.0552592	0.142999
GSM2235944	m6Acluster.A	0.279888	0.200216	0.355445	0.292602	0.205524	0.24168	-0.026537	0.277138	0.0677248	0.30533	0.0167778	0.100406	0.372598	0.410353	0.152531	0.0616252	-0.287287	0.327838	0.158583	0.196359	0.168715	-0.124462	0.134595
GSM2235945	m6Acluster.A	-0.201594	0.18461	0.202989	0.316019	0.233847	0.300521	-0.193865	0.310708	-0.184072	0.355674	0.10059	0.00134991	0.3613	0.374965	0.165	0.0610791	-0.120477	0.344607	0.196207	0.140518	0.0935784	-0.100638	0.086175
GSM2235946	m6Acluster.A	-0.256198	0.253764	0.240264	0.319666	0.200567	0.298031	-0.164642	0.25278	-0.183437	0.360427	-0.00888985	-0.092177	0.297832	0.351361	0.0899269	0.0571281	-0.158856	0.299681	0.053501	0.106249	0.045385	-0.09596	0.171605
GSM2235947	m6Acluster.B	-0.0400312	0.392355	0.437746	0.351306	0.186317	0.236201	-0.107175	0.32564	-0.0712222	0.352067	0.053763	-0.00828294	0.402598	0.366541	0.180697	0.0527256	-0.16236	0.297232	0.152843	0.153705	0.106497	-0.0546444	0.144482
GSM2235948	m6Acluster.A	0.250164	0.207698	0.353964	0.276926	0.237295	0.225038	0.109336	0.314225	0.0399747	0.329276	0.0619252	0.250957	0.40368	0.368812	0.182457	0.0832543	-0.206474	0.357546	0.1783	0.168215	0.195402	-0.168747	0.169563
GSM2235949	m6Acluster.A	0.175939	0.385951	0.431407	0.314738	0.231871	0.265515	0.00783496	0.329195	0.031454	0.354932	0.0664598	0.0923346	0.426181	0.379936	0.18512	0.0407215	-0.103482	0.324693	0.204621	0.187547	0.139252	-0.0579134	0.191608
GSM2235950	m6Acluster.A	-0.122489	0.03417	0.295128	0.219125	0.201071	0.161639	-0.0405831	0.268088	-0.195773	0.335627	0.0148028	0.210116	0.258009	0.311869	0.175147	0.0539809	-0.26157	0.331798	0.116011	0.121922	0.112703	-0.184228	0.137622
GSM2235951	m6Acluster.A	-0.217146	0.130087	0.28334	0.257602	0.19843	0.205403	-0.068503	0.261923	-0.207904	0.364529	0.0070383	0.134248	0.329218	0.312655	0.173412	0.0466263	-0.297892	0.342483	0.109341	0.177258	0.131743	-0.114888	0.165481
GSM2235952	m6Acluster.B	-0.221452	0.236756	0.356625	0.333863	0.21652	0.269971	-0.184996	0.269978	-0.202277	0.340755	-0.0318357	0.0350366	0.262356	0.326577	0.13858	0.0718163	-0.263422	0.286033	0.137782	0.0962398	0.110528	-0.0465623	0.189536
GSM2235953	m6Acluster.B	-0.329721	0.0893909	0.100394	0.231262	0.243479	0.214273	-0.152011	0.243908	-0.287549	0.327784	-0.0282381	0.0600242	0.130748	0.298568	0.153453	-0.0105554	-0.315723	0.270096	-0.0188117	0.0600047	0.0434336	-0.0548515	0.133133
GSM2235954	m6Acluster.B	-0.053918	0.343714	0.418998	0.325982	0.235444	0.22299	-0.0514952	0.312228	-0.104126	0.352451	0.0842274	0.0463746	0.393713	0.354517	0.189514	0.0592961	-0.24857	0.288026	0.191813	0.182503	0.104613	-0.0592111	0.128513
GSM2235955	m6Acluster.A	-0.180697	0.269473	0.346381	0.297674	0.218949	0.260147	-0.0718593	0.268105	-0.157092	0.362998	0.0583287	0.0326612	0.330496	0.325732	0.167835	0.0529198	-0.241729	0.272501	0.159236	0.167151	0.124045	-0.0577279	0.149941
GSM2235956	m6Acluster.B	-0.360109	0.142518	0.179828	0.269186	0.213414	0.243784	-0.274061	0.271144	-0.268947	0.302592	-0.0498786	-0.00290188	0.174931	0.338152	0.147968	0.018164	-0.234002	0.248101	0.049142	0.0614608	0.0638706	0.0203906	0.0690206
GSM2235957	m6Acluster.C	-0.253793	0.260727	0.34473	0.300334	0.223385	0.242112	-0.127701	0.346842	-0.181935	0.324695	0.0437744	-0.0211495	0.323437	0.346137	0.151982	0.0891715	-0.227235	0.285341	0.20536	0.153503	0.125926	-0.0827415	0.0606458
GSM2235958	m6Acluster.A	-0.235756	0.109916	0.226038	0.288837	0.239886	0.242553	-0.0453747	0.254223	-0.242962	0.346371	0.0205553	0.129983	0.338174	0.340464	0.164579	0.0421633	-0.239232	0.34079	0.0846653	0.170934	0.143393	-0.109426	0.134405
GSM2235959	m6Acluster.B	-0.289512	0.336975	0.265553	0.303349	0.175545	0.207651	-0.089613	0.263649	-0.228105	0.306948	-0.0471856	-0.0587707	0.226545	0.322337	0.129992	0.0746626	-0.217379	0.265269	0.05142	0.0996238	0.0742665	-0.185748	0.164277
GSM2235960	m6Acluster.B	-0.341666	0.256741	0.244934	0.312614	0.224767	0.245217	-0.164014	0.279082	-0.214791	0.268495	-0.00592546	0.0768737	0.288591	0.333765	0.153955	0.0593284	-0.0759178	0.273452	0.130757	0.0918835	0.105566	-0.0536281	0.123713
GSM2235961	m6Acluster.A	-0.325099	0.132946	0.225791	0.267061	0.216922	0.245038	0.0217944	0.304735	-0.247217	0.390026	0.0926853	0.108765	0.308427	0.328585	0.195433	0.092873	-0.238743	0.320876	0.202097	0.143147	0.109651	-0.111201	0.121165
GSM2235962	m6Acluster.C	-0.181402	0.270058	0.297321	0.331405	0.219439	0.27331	-0.175391	0.349663	-0.145667	0.37233	0.0503505	0.0456922	0.312664	0.333104	0.194371	0.0935589	-0.197266	0.3155	0.170978	0.14754	0.10013	-0.00820818	0.156047
GSM2235963	m6Acluster.C	-0.377807	0.2252	0.136082	0.261941	0.246416	0.252454	-0.195263	0.223342	-0.269597	0.263304	-0.0812465	-0.0563568	0.107458	0.334616	0.116772	0.0184324	-0.290912	0.244415	0.0389997	0.0644492	0.0306045	-0.119307	0.0634766
GSM2235964	m6Acluster.B	0.0624018	0.36385	0.44462	0.297602	0.24472	0.233933	-0.0482431	0.301019	-0.0702429	0.359941	0.0486148	0.0355477	0.399246	0.358021	0.186518	0.0438904	-0.235878	0.316101	0.193244	0.179646	0.127923	-0.0892579	0.182144
GSM2235965	m6Acluster.C	-0.214797	0.273941	0.356861	0.297104	0.200602	0.232966	-0.0363883	0.268639	-0.287444	0.32749	0.0457852	-0.0460401	0.260367	0.377689	0.103091	0.0721126	-0.296177	0.311674	0.0317038	0.0864552	0.0716185	-0.0955099	0.146288
GSM2235966	m6Acluster.A	0.0569237	0.162521	0.332934	0.262694	0.25086	0.228228	-0.0124557	0.276618	-0.118257	0.308391	-0.0261159	-0.0236499	0.265704	0.353235	0.151409	-0.0448348	-0.233484	0.312272	0.08754	0.146556	0.108492	-0.084373	0.0721748
GSM2235967	m6Acluster.C	-0.343416	0.107692	0.109492	0.187727	0.254108	0.232248	-0.182655	0.259025	-0.300848	0.234434	-0.128751	-0.176579	0.000951699	0.301083	0.0620722	-0.0364441	-0.303464	0.285821	-0.0612946	0.0210286	-0.0401179	-0.158971	0.126028
GSM2235968	m6Acluster.B	-0.319233	-0.0263598	0.163669	0.202073	0.175355	0.200334	-0.141609	0.263202	-0.221867	0.290929	-0.0640088	-0.0455845	0.127658	0.279406	0.107259	0.0166285	-0.286697	0.317966	0.121213	0.115106	0.0517746	-0.084145	0.0958557
GSM2235969	m6Acluster.C	-0.231383	0.242276	0.352912	0.331381	0.179797	0.285454	-0.15178	0.237367	-0.241455	0.321496	0.0151693	-0.108365	0.261933	0.368472	0.150996	0.0360915	-0.215918	0.299536	0.0783516	0.072979	0.085684	-0.0596444	0.0711431
GSM2235970	m6Acluster.A	0.0252103	0.227762	0.349928	0.310948	0.254018	0.256774	-0.0845854	0.303821	-0.092756	0.364891	0.0600471	0.0278962	0.320774	0.350462	0.182001	0.0514387	-0.280725	0.34509	0.165762	0.171681	0.150429	-0.078743	0.140523
GSM2235971	m6Acluster.C	0.100516	0.289051	0.407009	0.290085	0.176641	0.282818	0.032348	0.225919	-0.113001	0.319877	0.0572259	-0.0414568	0.29045	0.352052	0.151943	-0.00309741	-0.26244	0.317756	0.0909842	0.167068	0.145522	-0.0795358	0.0995579
GSM2235972	m6Acluster.C	-0.339867	0.223107	0.312807	0.231921	0.228605	0.280416	-0.16426	0.246173	-0.2752	0.297646	-0.0273332	-0.103021	0.145844	0.324996	0.128447	-0.0141333	-0.212526	0.242866	-0.0092835	0.0686505	0.000926731	-0.0514436	0.124417
GSM2235973	m6Acluster.C	-0.371237	0.10702	0.178993	0.224883	0.231723	0.295798	-0.192413	0.194344	-0.287778	0.292957	-0.0307185	-0.115958	0.153238	0.353304	0.114479	0.00384527	-0.215933	0.283777	-0.0273229	0.0669171	0.0545594	-0.0464586	0.0554804
GSM2235974	m6Acluster.C	-0.347162	0.217705	0.200512	0.226236	0.200059	0.262857	-0.170912	0.243021	-0.3272	0.327804	-0.0301526	-0.109246	0.156365	0.321593	0.0815689	-0.0117547	-0.213357	0.2952	-0.00463856	0.0481914	0.026034	-0.127419	0.100488
GSM2235975	m6Acluster.C	-0.161473	0.345174	0.45695	0.323566	0.213121	0.308936	-0.0984582	0.26463	-0.189854	0.356081	0.0431567	-0.0820357	0.331151	0.351156	0.140768	0.045367	-0.186491	0.313142	0.116266	0.119034	0.097808	-0.110403	0.152023
GSM2235976	m6Acluster.C	-0.134891	0.409145	0.479942	0.335305	0.19818	0.272201	0.0388538	0.246527	-0.187287	0.35352	0.00895511	0.0391435	0.308246	0.363717	0.173502	0.122617	-0.194946	0.296921	0.139702	0.138944	0.0979709	-0.0829427	0.153891
GSM2235977	m6Acluster.A	-0.378063	0.0716702	0.108598	0.232313	0.196439	0.271092	-0.242115	0.250284	-0.300169	0.336634	-0.0469085	-0.0294869	0.0877527	0.345124	0.132478	0.013191	-0.313085	0.296958	-0.0369062	0.0631825	0.0628993	-0.0793342	0.0999448
GSM2235978	m6Acluster.A	0.00599367	0.360147	0.493747	0.317647	0.246046	0.253109	-0.0629814	0.340573	-0.0442866	0.288249	0.132246	0.130243	0.451088	0.365315	0.202463	0.0459392	-0.214737	0.3215	0.244262	0.215922	0.160566	-0.0567644	0.162674
GSM2235979	m6Acluster.A	-0.156032	0.188172	0.248642	0.253773	0.231497	0.262797	-0.0781253	0.31785	-0.197235	0.342324	0.0504299	0.0658482	0.282311	0.328495	0.147092	0.0220496	-0.158492	0.301721	0.150236	0.133442	0.100724	-0.0954683	0.114656
GSM2235980	m6Acluster.A	-0.13253	0.323568	0.465459	0.369483	0.304548	0.247668	-0.0038872	0.310244	-0.104139	0.390715	0.0536337	0.216204	0.380695	0.349398	0.170678	0.0599392	0.0674003	0.334464	0.161129	0.157889	0.137763	-0.00921296	0.198642
GSM2235981	m6Acluster.A	-0.16254	0.317829	0.383195	0.280426	0.213338	0.262853	-0.130569	0.334619	-0.153601	0.358005	0.0416726	0.0254358	0.351624	0.336132	0.169775	0.0459099	-0.214315	0.294611	0.199519	0.152511	0.115959	-0.00672681	0.105307
GSM2235982	m6Acluster.A	-0.191589	0.293912	0.3361	0.351002	0.237486	0.304102	-0.080166	0.324297	-0.155788	0.393999	0.108736	0.0555333	0.384758	0.359609	0.195363	0.0782595	-0.170321	0.329734	0.237537	0.190975	0.164856	-0.000158699	0.18691
GSM2235983	m6Acluster.A	0.21835	0.413731	0.526981	0.321678	0.245914	0.270382	-0.000829772	0.356571	0.0778149	0.356889	0.142756	0.146741	0.518919	0.401346	0.225413	0.0637522	-0.126164	0.348318	0.284185	0.22935	0.210747	-0.0672055	0.20213
GSM2235984	m6Acluster.C	-0.164617	0.273842	0.331738	0.248615	0.264697	0.260715	-0.0906117	0.315866	-0.221454	0.342536	0.0249352	0.0892049	0.262918	0.304998	0.122031	0.0199613	-0.260776	0.26945	0.109581	0.105908	0.0965757	-0.0343113	0.120926
GSM2235985	m6Acluster.C	-0.0292582	0.279291	0.303915	0.391409	0.23365	0.306612	-0.0609025	0.312277	-0.0652575	0.38285	0.129271	0.0985639	0.421942	0.368962	0.192701	0.0474285	0.0391699	0.37016	0.234077	0.172205	0.107882	-0.0249369	0.0799486
GSM2235986	m6Acluster.A	-0.129699	0.251872	0.296772	0.229228	0.233238	0.232011	-0.0390627	0.290315	-0.196779	0.306543	-0.0199398	0.0113376	0.263825	0.348106	0.11262	0.0066731	-0.228304	0.256825	0.0781989	0.101109	0.0766238	-0.0647428	0.113612
GSM2235987	m6Acluster.A	-0.171564	0.285893	0.361747	0.335258	0.225299	0.292864	-0.14028	0.366038	-0.159445	0.362338	0.0633984	0.122276	0.389523	0.354207	0.168691	0.100229	-0.17395	0.317783	0.214697	0.188533	0.155697	-0.0764993	0.168094
GSM2235988	m6Acluster.A	-0.0745983	0.199875	0.254517	0.226453	0.224148	0.244218	-0.0395625	0.263667	-0.211969	0.314233	-0.0793447	0.000152162	0.180813	0.336329	0.0986458	-0.0395279	-0.271143	0.280965	0.0198353	0.0955377	0.0664868	-0.0946103	0.140953
GSM2235991	m6Acluster.A	-0.12225	0.148726	0.248224	0.326999	0.205739	0.258361	-0.168502	0.342555	-0.158549	0.349894	0.0778535	0.0649784	0.416405	0.348871	0.171945	0.0273712	-0.134226	0.253688	0.108935	0.162556	0.0805014	-0.0438215	0.0315091
GSM2235992	m6Acluster.A	-0.0923742	0.167422	0.271413	0.270417	0.219403	0.250197	-0.108476	0.271379	-0.182393	0.329727	0.0115235	0.0241095	0.304626	0.321034	0.114462	0.041019	-0.204006	0.299206	0.0432441	0.107095	0.0870582	-0.0844722	0.149957
GSM2235993	m6Acluster.A	0.160705	0.389346	0.509656	0.320488	0.257087	0.278003	-0.0177724	0.322226	0.00865495	0.368396	0.0839092	0.0596239	0.472333	0.378018	0.200832	0.0455856	-0.228435	0.325503	0.223196	0.197511	0.162094	-0.084148	0.196248
GSM2235994	m6Acluster.B	-0.294268	-0.0917583	0.0800377	0.187487	0.154998	0.165917	-0.184136	0.279289	-0.226148	0.310502	-0.0656744	0.0777427	0.0893495	0.286593	0.182504	-0.0361017	-0.162052	0.297368	0.00389534	0.0188153	2.83e-05	-0.181391	0.123503
GSM2235995	m6Acluster.B	-0.297964	0.23334	0.260268	0.286939	0.243445	0.231975	-0.188522	0.281525	-0.204816	0.353316	-0.0528814	-0.0217732	0.206362	0.35149	0.134498	0.0276407	-0.201116	0.207294	0.0795877	0.0789526	0.0957879	-0.0759043	0.137544
GSM2235996	m6Acluster.C	-0.124742	0.236358	0.314099	0.378212	0.247539	0.290794	-0.047594	0.340071	-0.016773	0.427768	0.0491907	0.212625	0.427769	0.379936	0.214091	0.0779451	0.216005	0.347178	0.180668	0.174527	0.100978	0.00549828	0.125341
GSM2235997	m6Acluster.C	-0.306778	0.232538	0.276234	0.320875	0.254209	0.266295	-0.166856	0.220762	-0.259762	0.324274	-0.0301797	0.0642476	0.229888	0.334484	0.174006	0.0777037	-0.212268	0.312253	0.112838	0.116238	0.107783	-0.0764445	0.117003
GSM2235998	m6Acluster.B	-0.319566	0.188585	0.230771	0.254779	0.240128	0.198791	-0.127286	0.255532	-0.258777	0.304117	-0.0592803	-0.045771	0.173411	0.363602	0.154416	0.0192978	-0.333345	0.272594	0.0443826	0.0674492	0.0510743	-0.0921346	0.114679
GSM2235999	m6Acluster.B	-0.185138	0.27069	0.210377	0.298837	0.213844	0.22664	-0.176346	0.312033	-0.202024	0.300139	-0.0363261	-0.0509731	0.206484	0.347739	0.162987	0.0605995	-0.256838	0.257152	0.1283	0.118222	0.072813	-0.078524	0.107756
GSM2236000	m6Acluster.C	-0.205563	0.164317	0.164312	0.291939	0.187438	0.268947	-0.21361	0.303928	-0.247776	0.352033	0.0948563	-0.0801213	0.270543	0.425876	0.155627	0.040021	-0.261473	0.309598	0.116659	0.108719	0.0433629	-0.124142	0.05204
GSM2236001	m6Acluster.B	-0.150435	0.20571	0.313033	0.285954	0.245321	0.250414	-0.020416	0.26807	-0.178416	0.353621	0.0418312	0.102302	0.309362	0.335293	0.151971	0.0436557	-0.315569	0.339704	0.123165	0.156239	0.138672	-0.074037	0.146514
GSM2236002	m6Acluster.C	-0.4244	0.212623	0.125099	0.199564	0.203628	0.240605	-0.0626384	0.252193	-0.287348	0.256709	-0.138523	-0.0337392	0.093317	0.311665	0.104732	-0.00918505	-0.293928	0.236338	0.0142337	0.0411094	0.033098	-0.101979	0.069216
GSM2236003	m6Acluster.A	-0.309134	0.0830472	0.161183	0.22862	0.196353	0.228427	-0.117826	0.222725	-0.301793	0.318517	-0.0582674	-0.0133998	0.144533	0.316454	0.161879	0.00433112	-0.352487	0.296396	0.0390156	0.0803038	0.072278	-0.0659957	0.101618
GSM2236004	m6Acluster.A	-0.307046	0.19857	0.248523	0.262953	0.253262	0.212992	-0.0841368	0.297784	-0.220024	0.292557	-0.0425494	-0.0218112	0.24545	0.331624	0.130886	0.00107266	-0.113774	0.282764	0.0705283	0.118145	0.0678688	-0.0871964	0.102848
GSM2236005	m6Acluster.C	-0.343353	0.243271	0.180563	0.278126	0.219076	0.267583	-0.199124	0.256598	-0.25272	0.311053	-0.0420967	-0.062761	0.123266	0.334452	0.160372	0.0459586	-0.243979	0.290784	0.00575812	0.0619495	0.0563637	-0.055154	0.118194
GSM2236006	m6Acluster.C	-0.301949	0.264944	0.19638	0.251544	0.211954	0.253001	-0.170302	0.251837	-0.202768	0.297776	-0.0489572	-0.0608061	0.235934	0.319808	0.125554	0.0162227	-0.130809	0.243441	0.0582748	0.11031	0.0132757	-0.075396	0.132439
GSM2236007	m6Acluster.A	-0.1744	0.327752	0.358154	0.345346	0.229953	0.26838	-0.130319	0.393429	-0.104565	0.361115	0.0911372	0.0974114	0.449183	0.36359	0.216677	0.109132	-0.176749	0.309785	0.284598	0.188398	0.149673	-0.0450977	0.17105
GSM2236008	m6Acluster.C	0.00418742	0.19302	0.398803	0.316918	0.239372	0.22236	-0.0358328	0.350981	-0.079469	0.380879	0.0367994	0.234821	0.45169	0.395152	0.218833	0.0455358	-0.111351	0.340799	0.145934	0.186916	0.156499	-0.0559458	0.112956
GSM2236009	m6Acluster.B	-0.180992	0.266122	0.263331	0.298572	0.201825	0.243711	-0.174015	0.263643	-0.195663	0.323203	0.00775955	-0.0281609	0.260406	0.311632	0.143793	0.0251265	-0.322898	0.289282	0.0810273	0.0979872	0.0955502	-0.1051	0.0946923
GSM2236010	m6Acluster.B	-0.0259901	0.309338	0.32626	0.258699	0.252543	0.246639	-0.0291318	0.276218	-0.121937	0.313075	-0.00488847	0.0887568	0.21093	0.323774	0.125314	-0.0253381	-0.267156	0.257082	0.0516176	0.117129	0.0810075	0.0176787	0.113312
GSM2236011	m6Acluster.C	-0.177513	0.264981	0.318562	0.296122	0.199418	0.249499	-0.0244537	0.290271	-0.196735	0.305091	-0.050001	0.125453	0.298849	0.338865	0.143785	0.036736	-0.182743	0.301421	0.0790317	0.100169	0.0651192	-0.103353	0.131942
GSM2236012	m6Acluster.B	-0.262575	0.290228	0.245653	0.282123	0.226393	0.229576	-0.0850191	0.317137	-0.202185	0.414794	0.015311	0.0408491	0.215147	0.322505	0.167813	0.0550505	-0.207403	0.307143	0.130214	0.124242	0.11714	-0.0457745	0.211219
GSM2236013	m6Acluster.B	-0.216824	0.330096	0.286074	0.297422	0.19565	0.251131	-0.0630922	0.334731	-0.189221	0.387127	0.0304989	0.0654332	0.292178	0.350053	0.185256	0.0658613	-0.113711	0.283076	0.211275	0.161389	0.128085	-0.0642869	0.197817
GSM2236014	m6Acluster.B	-0.28652	0.356519	0.373503	0.342038	0.191984	0.23271	-0.17532	0.28722	-0.185548	0.354749	-0.0464431	-0.0915041	0.235621	0.349158	0.15919	0.0326847	-0.170386	0.234128	0.0546129	0.0379614	0.0594872	-0.0370402	0.103367
GSM2236015	m6Acluster.B	0.100117	0.257308	0.319428	0.241804	0.212698	0.23851	0.00698823	0.250188	-0.0449972	0.347694	-0.0193658	0.0270037	0.290903	0.32292	0.196927	0.0119997	-0.274862	0.295672	0.111743	0.106466	0.129154	-0.118533	0.181941
GSM2236016	m6Acluster.B	-0.293722	0.305993	0.224673	0.241199	0.191632	0.251206	-0.120007	0.291769	-0.239191	0.348859	-0.0651985	0.102066	0.171239	0.294024	0.168746	0.0147333	-0.147492	0.262114	0.0688107	0.0633454	0.0705381	-0.0827195	0.276055
GSM2236017	m6Acluster.A	-0.249206	0.164076	0.234118	0.244287	0.218523	0.247646	-0.186527	0.281586	-0.210265	0.355774	-0.0679888	0.00842065	0.154223	0.310514	0.153284	-0.00504631	-0.188285	0.28108	0.0676061	0.0745864	0.0842295	-0.1038	0.173552
GSM2236018	m6Acluster.B	-0.147374	0.246893	0.309672	0.22273	0.266247	0.249968	0.0399358	0.283809	-0.133424	0.361296	-0.0547062	0.00805628	0.22956	0.330234	0.15333	0.0144804	-0.152118	0.259735	0.0863471	0.101256	0.115551	-0.0287305	0.187281
GSM2236019	m6Acluster.C	-0.299363	0.271122	0.220483	0.235953	0.241161	0.215805	-0.046035	0.287926	-0.23976	0.277291	-0.0482554	-0.0562774	0.150961	0.314273	0.130671	0.0310667	-0.21526	0.296794	0.112174	0.0827349	0.0653902	-0.0798497	0.0924336
GSM2236020	m6Acluster.B	-0.194892	0.354564	0.311598	0.303771	0.212396	0.236932	-0.152283	0.293463	-0.179643	0.260892	-0.00741656	-0.0531125	0.204043	0.314785	0.18402	0.0333405	-0.138429	0.244012	0.0979102	0.054687	0.0778333	-0.0362451	0.157199
GSM2236021	m6Acluster.B	-0.129945	0.196115	0.291325	0.253647	0.198855	0.239987	-0.0481872	0.265506	-0.176206	0.346543	0.0343966	0.0586979	0.262223	0.30983	0.185739	0.0507652	-0.316194	0.340749	0.125064	0.141214	0.160951	-0.100881	0.183055
GSM2236022	m6Acluster.C	-0.315209	0.248073	0.223237	0.248171	0.212638	0.265167	-0.0800734	0.288431	-0.237364	0.302632	-0.0583929	0.0409738	0.174202	0.344158	0.16759	0.0337122	-0.155156	0.284576	0.0947157	0.0865953	0.0699489	-0.0568036	0.198012
GSM2236023	m6Acluster.B	0.0617266	0.439999	0.415985	0.32904	0.227355	0.215597	-0.0337184	0.299201	0.00861954	0.335669	0.0258493	0.00635752	0.373907	0.345649	0.14148	0.055831	-0.247828	0.288971	0.223525	0.113931	0.149917	-0.0272835	0.198574
GSM2236024	m6Acluster.B	0.306201	0.398365	0.419374	0.301146	0.231394	0.259641	0.0122282	0.223832	0.116525	0.360822	0.00100715	0.00491059	0.327106	0.374077	0.174974	0.0197429	-0.181678	0.294923	0.140128	0.146581	0.150063	-0.071991	0.15378
GSM2236025	m6Acluster.A	0.402635	0.301617	0.411249	0.302209	0.252555	0.229053	0.0750155	0.282504	0.241362	0.35915	0.0861835	0.166594	0.434477	0.402316	0.188718	0.0466619	-0.292419	0.353237	0.200308	0.20601	0.204233	-0.0834641	0.165224
GSM2236026	m6Acluster.C	-0.155413	0.119143	0.255233	0.268232	0.230011	0.216702	-0.0585542	0.362191	-0.105133	0.357552	0.033386	0.218737	0.343651	0.316062	0.21108	0.0655978	-0.0489313	0.314051	0.13813	0.158861	0.0589518	-0.0725704	0.0811129
GSM2236027	m6Acluster.C	-0.260712	0.154348	0.241633	0.366414	0.22947	0.255025	-0.0543933	0.36265	-0.159553	0.389958	0.0142015	0.24386	0.340882	0.326219	0.193432	0.0423426	-0.0421956	0.282029	0.174814	0.154457	0.0816582	-0.0851241	0.131535
GSM2236028	m6Acluster.B	-0.23512	0.309775	0.322576	0.322404	0.270578	0.217487	-0.0956116	0.365504	-0.151367	0.362065	0.0574339	0.0951723	0.401358	0.347432	0.169495	0.0847291	-0.145533	0.220791	0.163143	0.137363	0.146608	-0.0283721	0.153809
GSM2236029	m6Acluster.C	0.206782	0.409414	0.440088	0.28454	0.22411	0.263856	-0.0260117	0.267033	0.0627722	0.30217	-0.0125183	-0.0823298	0.364254	0.318458	0.119697	7.76e-05	-0.242335	0.278982	0.148792	0.147789	0.109446	-0.0910313	0.216199
GSM2236030	m6Acluster.B	-0.298309	0.272771	0.248936	0.293167	0.213761	0.256799	-0.0589956	0.285935	-0.224154	0.337437	0.0488014	0.0465307	0.302092	0.334788	0.1544	0.0706437	-0.300549	0.24372	0.178973	0.131138	0.0916655	-0.0729561	0.103167
GSM2236031	m6Acluster.A	0.0531668	0.220002	0.294036	0.293116	0.253683	0.225097	0.0507956	0.305233	-0.0759138	0.358315	0.068664	0.156165	0.391569	0.339815	0.139295	0.0929442	-0.221106	0.345201	0.150462	0.182862	0.170955	-0.0968474	0.157094
GSM2236032	m6Acluster.B	-0.238954	0.327466	0.34669	0.286136	0.205907	0.238998	-0.140452	0.271876	-0.211154	0.294809	-0.0373431	-0.00192505	0.255888	0.320634	0.156454	0.0397182	-0.269367	0.231898	0.105887	0.0945992	0.115427	-0.0444549	0.175443
GSM2236033	m6Acluster.C	-0.300978	0.152701	0.142032	0.284468	0.192912	0.219825	-0.248379	0.266575	-0.262516	0.358495	-0.0156002	-0.0763563	0.218938	0.315332	0.106801	0.014453	-0.221749	0.264749	0.115734	0.10038	0.0250756	-0.208828	0.0970066
GSM2236034	m6Acluster.A	0.187393	0.392835	0.478285	0.342268	0.250582	0.257468	-0.0445801	0.291793	0.0295887	0.319884	0.061969	-0.0330031	0.411477	0.375211	0.193076	0.0455949	-0.226509	0.323422	0.183212	0.176344	0.155136	0.0125817	0.229421
GSM2236036	m6Acluster.A	-0.241286	0.235792	0.20833	0.192004	0.239283	0.230131	-0.0817966	0.257285	-0.2526	0.305477	-0.0157063	0.00995647	0.173685	0.309564	0.113812	-0.0189315	-0.276273	0.227248	0.0409585	0.0856415	0.0248341	-0.0956721	0.186387
GSM2236037	m6Acluster.A	-0.285765	0.155087	0.250659	0.289925	0.227648	0.269923	-0.08023	0.35672	-0.192175	0.37982	0.0902343	0.110423	0.35235	0.346248	0.191422	0.0811552	-0.227878	0.31977	0.184375	0.189049	0.134731	-0.0719717	0.135908
GSM2236038	m6Acluster.A	-0.011467	0.253564	0.391252	0.270487	0.249305	0.262169	-0.0364239	0.262903	-0.129552	0.369306	0.0536336	0.00773177	0.34861	0.344495	0.158204	0.0359253	-0.234919	0.321086	0.0782448	0.146256	0.128061	-0.0834741	0.108766
GSM2236039	m6Acluster.C	-0.323112	0.196429	0.217507	0.196204	0.236388	0.260263	-0.140843	0.284975	-0.282861	0.305246	-0.082057	-0.0529932	0.191666	0.295556	0.123668	-0.0115647	-0.152318	0.284035	0.0314699	0.06186	0.0395008	-0.107029	0.160293
GSM2236040	m6Acluster.B	-0.26121	0.283281	0.285343	0.279553	0.210187	0.205729	-0.026814	0.282476	-0.21407	0.281563	-0.000682989	0.116837	0.287078	0.33355	0.103935	-0.00577241	0.0229571	0.226074	0.0908894	0.0482694	0.106973	0.00181099	0.224148
GSM2236041	m6Acluster.A	0.0963302	0.308813	0.40129	0.287859	0.265529	0.258104	0.0455701	0.341468	-0.0388331	0.391854	0.124142	0.203684	0.452688	0.36086	0.190534	0.0452987	-0.0942715	0.336715	0.217979	0.211923	0.187469	-0.0591842	0.22213
GSM2236042	m6Acluster.C	-0.117769	0.223207	0.319824	0.250005	0.246472	0.263824	0.00506938	0.248863	-0.182397	0.269726	-0.0762086	-0.0269211	0.160637	0.333503	0.126096	0.0223159	-0.297726	0.279688	0.0728361	0.109374	0.0625731	-0.0669475	0.0308325
GSM2236043	m6Acluster.A	0.00247679	0.300377	0.327773	0.282251	0.23485	0.257956	-0.00477486	0.326999	-0.107217	0.370139	0.0737177	0.0382125	0.364979	0.363604	0.175115	0.0176731	-0.141258	0.3319	0.208865	0.173562	0.114431	0.00246152	0.193015
GSM2236044	m6Acluster.C	-0.32637	0.201694	0.147257	0.265682	0.197353	0.251173	-0.123566	0.25174	-0.29726	0.336638	-0.0586971	-0.0976628	0.131646	0.340107	0.111842	0.0271668	-0.327113	0.300107	0.00811818	0.0585253	0.0238946	-0.0804242	0.053192
GSM2236045	m6Acluster.C	-0.192798	0.296485	0.369657	0.338407	0.225216	0.225617	-0.245308	0.32138	-0.136876	0.32011	-0.00817324	0.12795	0.274805	0.341085	0.167652	0.0138621	0.00637435	0.238734	0.0996128	0.112791	0.0737274	0.0170689	0.109855
GSM2236046	m6Acluster.C	-0.190614	0.211706	0.229922	0.272344	0.225457	0.24141	-0.104001	0.258117	-0.234228	0.316841	-0.0321065	-0.00788967	0.185977	0.341574	0.14312	0.0228073	-0.276933	0.234189	0.0424871	0.0943953	0.069413	-0.0565043	0.111651
GSM2236047	m6Acluster.B	0.369744	0.415267	0.306674	0.350124	0.266166	0.276448	0.0419515	0.348956	0.187036	0.362144	0.0897629	0.0769188	0.36845	0.389159	0.179289	0.0885271	-0.327239	0.341345	0.23703	0.220422	0.160323	-0.0836936	0.136108
GSM2236048	m6Acluster.B	-0.205737	0.432648	0.289191	0.280256	0.226764	0.237336	-0.168807	0.308652	-0.154742	0.268839	0.0123772	-0.0170385	0.21264	0.304017	0.148013	0.0113735	-0.224719	0.24856	0.119527	0.106674	0.0644166	-0.0533241	0.173821
GSM2236049	m6Acluster.B	0.521371	0.503911	0.409425	0.289671	0.264867	0.265982	0.0864804	0.301104	0.39686	0.312757	0.0150712	-0.0133989	0.37791	0.40722	0.187877	0.0705811	-0.295349	0.357303	0.232559	0.195512	0.180019	-0.123013	0.188639
GSM2236050	m6Acluster.B	-0.279825	0.26612	0.176201	0.245786	0.243933	0.264091	-0.0877628	0.284958	-0.177342	0.290479	0.00290092	-0.0877343	0.146916	0.343636	0.1486	0.0221011	-0.243506	0.315734	0.114323	0.112629	0.0387199	-0.0599803	0.148507
GSM2236051	m6Acluster.B	-0.0416532	0.261517	0.284707	0.251389	0.209884	0.237848	0.028539	0.246445	-0.0601742	0.319796	-0.0454587	0.0665914	0.223647	0.304423	0.169751	0.054401	-0.222681	0.338472	0.103459	0.10601	0.131113	-0.0976363	0.154832
GSM2236052	m6Acluster.B	-0.340751	0.292735	0.193931	0.231244	0.227001	0.235567	-0.155528	0.280887	-0.255814	0.313814	-0.0353271	0.00033021	0.167569	0.308901	0.136212	0.012703	-0.159747	0.232198	0.0628809	0.0667437	0.0313443	-0.0579003	0.153527
GSM2236053	m6Acluster.B	-0.270445	0.198711	0.148267	0.289422	0.214683	0.24111	-0.0326826	0.287431	-0.185568	0.354863	-0.00671922	0.056522	0.232264	0.318836	0.190069	0.0520888	-0.256386	0.338385	0.146708	0.137706	0.0828312	-0.146884	0.183617
GSM2236054	m6Acluster.A	-0.220995	0.183865	0.22749	0.29898	0.231878	0.257264	-0.0677853	0.307384	-0.184714	0.397195	0.109572	0.102092	0.327875	0.330967	0.205582	0.0584755	-0.226438	0.332589	0.218245	0.174774	0.150855	-0.106515	0.169715
GSM2236055	m6Acluster.B	-0.367025	0.150133	0.171741	0.232706	0.190136	0.202873	-0.143044	0.268264	-0.288027	0.324555	-0.0374236	-0.109546	0.109774	0.303261	0.15045	0.0193949	-0.236303	0.265321	0.0928069	0.120022	0.0410901	-0.0683752	0.144796
GSM2236056	m6Acluster.B	-0.26447	0.155896	0.229983	0.215136	0.227854	0.281805	-0.101983	0.247495	-0.231066	0.243455	-0.0794356	-0.0210343	0.0886473	0.344203	0.112263	-0.0314353	-0.13341	0.285457	0.0420251	0.0648348	0.0736791	-0.133137	0.0777639
GSM2236057	m6Acluster.A	0.0787543	0.302712	0.321329	0.285958	0.243974	0.236638	-0.0754528	0.304894	-0.0136078	0.336599	0.0180741	0.142915	0.342117	0.32771	0.149557	0.0172085	-0.307237	0.332515	0.168063	0.191013	0.157706	-0.0751399	0.182619
GSM2236058	m6Acluster.A	-0.136313	0.275502	0.264485	0.225496	0.199628	0.256179	-0.0620863	0.290102	-0.147513	0.348982	-0.0287593	0.0693216	0.203918	0.296496	0.136784	-0.0123878	-0.172634	0.29892	0.0760582	0.126139	0.0967895	-0.0703554	0.178988
GSM2236059	m6Acluster.A	-0.277542	0.201824	0.203436	0.309715	0.246379	0.267667	-0.0485549	0.335098	-0.222966	0.382465	0.0643379	0.104496	0.300554	0.333096	0.166671	0.0958669	-0.232787	0.31803	0.201795	0.131706	0.11748	0.00647346	0.130345
GSM2236060	m6Acluster.A	-0.0711901	0.330766	0.362077	0.340862	0.224693	0.247501	0.0569984	0.398207	-0.0991248	0.412284	0.182163	0.241363	0.453185	0.349884	0.206313	0.127369	0.082122	0.402156	0.319543	0.232201	0.196516	-0.0836966	0.164199
GSM2236061	m6Acluster.A	-0.00310678	0.289582	0.400731	0.281729	0.24139	0.25222	0.0805853	0.407521	-0.066156	0.40434	0.20547	0.215863	0.499606	0.391842	0.185596	0.0940072	-0.146548	0.339248	0.32553	0.243372	0.182342	-0.0318325	0.178293
GSM2236062	m6Acluster.B	-0.256974	0.330894	0.28779	0.293647	0.199057	0.264961	-0.0767988	0.352688	-0.177288	0.361792	0.0630414	0.104137	0.306387	0.33665	0.177951	0.0576748	-0.0756996	0.288914	0.205829	0.120849	0.125099	-0.0318656	0.163341
GSM2236063	m6Acluster.C	-0.317167	0.221356	0.201614	0.234029	0.206183	0.257264	-0.050546	0.333633	-0.224365	0.329032	0.0133151	0.0611589	0.234894	0.326564	0.151734	0.0753525	-0.181224	0.336163	0.172842	0.1224	0.0847016	-0.0517426	0.0463739
GSM2236064	m6Acluster.B	-0.336537	0.296311	0.284738	0.262484	0.227494	0.281715	-0.163988	0.314285	-0.240679	0.285708	-0.0264092	0.0724448	0.205906	0.34522	0.119039	0.0366675	-0.143815	0.27815	0.0922078	0.0857735	0.0785378	-0.0384925	0.14924
GSM2236065	m6Acluster.C	-0.25408	0.269403	0.236712	0.255452	0.180685	0.174283	-0.0649946	0.270313	-0.207086	0.313873	-0.0532239	-0.139294	0.169716	0.307489	0.167091	0.0416475	-0.27901	0.2667	0.0504809	0.100633	0.0551909	-0.104555	0.175148
GSM2236066	m6Acluster.C	0.0502072	0.287647	0.244652	0.250913	0.227092	0.272482	-0.0222252	0.231916	-0.078027	0.351151	-0.117053	-0.0633932	0.159919	0.340867	0.209038	0.0884639	-0.13194	0.277668	0.144369	0.120799	0.102285	-0.0393081	0.155137
GSM2236067	m6Acluster.C	-0.163077	0.315741	0.333547	0.333832	0.246156	0.210693	-0.090548	0.329929	-0.149271	0.325357	-0.00867614	-0.0146874	0.239186	0.349404	0.223135	0.0551277	-0.0770524	0.311041	0.215302	0.110937	0.115237	-0.0582092	0.21524
GSM2236068	m6Acluster.A	0.019233	0.10652	0.294709	0.224633	0.194758	0.189313	-0.0123523	0.255204	-0.0886233	0.340896	-0.0242934	0.0122893	0.261573	0.327698	0.169234	0.0413662	-0.270178	0.307673	0.0799851	0.125562	0.135444	-0.126934	0.149392
GSM2236069	m6Acluster.C	-0.207557	0.223192	0.173521	0.280777	0.225639	0.253172	-0.0835147	0.236382	-0.23456	0.273425	-0.058818	-0.143544	0.0913821	0.346984	0.119758	-0.00905859	-0.184913	0.182199	-0.0242549	0.0715745	0.0391476	-0.0243264	0.131803
GSM2236070	m6Acluster.C	-0.0456261	0.389625	0.492669	0.346075	0.278455	0.21217	-0.0414296	0.303057	-0.134696	0.37217	0.0124819	-0.0327866	0.358114	0.359071	0.20264	0.0863212	-0.119641	0.316062	0.198791	0.158282	0.12748	0.0198636	0.233433
GSM2236071	m6Acluster.B	-0.058553	0.452304	0.42549	0.297298	0.237048	0.188918	-0.0062608	0.313388	-0.0687461	0.360892	0.042933	0.0341466	0.36666	0.314854	0.187606	0.0320526	-0.147503	0.270737	0.197999	0.146045	0.118583	-0.0273942	0.223389
GSM2236072	m6Acluster.B	-0.141964	0.332586	0.40723	0.347493	0.265868	0.209218	-0.130127	0.308747	-0.121372	0.346475	0.116049	0.000855498	0.406152	0.317028	0.20682	0.0978663	-0.236413	0.230028	0.236298	0.16353	0.112288	-0.0824633	0.168782
GSM2236073	m6Acluster.B	-0.276359	0.245661	0.21524	0.256255	0.216929	0.295841	-0.174586	0.280304	-0.257685	0.345491	0.0237378	0.0742898	0.237028	0.423332	0.160311	0.0361942	-0.207026	0.27004	0.104033	0.100683	0.0729369	-0.124069	0.105444
GSM2236074	m6Acluster.B	-0.156557	0.326851	0.294433	0.240862	0.217986	0.246232	-0.156086	0.256478	-0.186032	0.319583	-0.0690025	-0.0553851	0.215199	0.347968	0.178722	0.0500458	-0.233456	0.31226	0.0998967	0.0580886	0.0541774	-0.0912186	0.197333
GSM2236075	m6Acluster.A	-0.186141	0.27666	0.279573	0.290529	0.221793	0.243876	-0.00463216	0.313923	-0.182994	0.371752	0.0197191	0.13947	0.346021	0.322857	0.193613	0.0735222	-0.191224	0.338295	0.18182	0.161681	0.149313	-0.133713	0.179584
GSM2236076	m6Acluster.B	0.0757352	0.424228	0.470288	0.333455	0.310725	0.254052	-0.0291957	0.289048	0.00793935	0.357022	0.114076	0.0576219	0.386986	0.355376	0.186999	0.0405739	-0.245247	0.316355	0.167857	0.15832	0.143386	-0.0174296	0.223898
GSM2236077	m6Acluster.B	-0.172805	0.372939	0.396951	0.308944	0.255688	0.238551	-0.0739253	0.317303	-0.146766	0.331427	0.0166106	-0.0329207	0.280265	0.324436	0.156911	0.0618686	-0.186598	0.256978	0.144417	0.116391	0.117388	-0.0476583	0.188197
GSM2236078	m6Acluster.B	-0.337343	0.199142	0.0908639	0.189797	0.237053	0.232014	-0.216228	0.244449	-0.272433	0.29706	-0.080092	-0.0662984	0.121891	0.325524	0.0911795	0.017806	-0.295054	0.242169	0.0441217	0.063433	0.0347244	-0.0902035	0.187867
GSM2236079	m6Acluster.C	-0.102231	0.392203	0.424137	0.337272	0.272485	0.257156	-0.0458714	0.31765	-0.101522	0.391717	0.0782075	-0.0313941	0.395316	0.340031	0.181257	0.0287508	-0.215259	0.305148	0.179256	0.173338	0.134715	-0.0353698	0.158887
GSM2236080	m6Acluster.A	-0.293098	0.363349	0.291446	0.355995	0.236265	0.274683	0.0507867	0.331683	-0.134654	0.389362	0.045502	0.201985	0.357991	0.317572	0.18768	0.103663	-0.0445539	0.338926	0.260378	0.151008	0.162598	-0.0228877	0.190911
GSM2236082	m6Acluster.A	0.140404	0.281031	0.313259	0.271377	0.235615	0.229016	0.0337708	0.305022	-0.025767	0.349616	-0.0359173	0.0446708	0.310392	0.356398	0.139649	-0.0382786	-0.301022	0.282021	0.135747	0.160438	0.100284	-0.105581	0.164973
GSM2236083	m6Acluster.A	-0.0485097	0.148775	0.325764	0.227111	0.274938	0.186264	-0.0477293	0.267564	-0.174034	0.307348	-0.074142	0.0673057	0.196398	0.342283	0.117559	-0.0398753	-0.274697	0.278344	0.0136854	0.119461	0.0839977	-0.121853	0.0902721
GSM2236084	m6Acluster.B	-0.24577	0.265836	0.232655	0.303337	0.201184	0.260967	-0.052185	0.2971	-0.230326	0.318591	0.00287436	0.0725343	0.247485	0.333121	0.118463	0.0152863	-0.18994	0.292542	0.110951	0.0944522	0.108841	-0.0829522	0.156948
GSM2236085	m6Acluster.B	-0.168793	0.367552	0.403504	0.275123	0.230571	0.223125	-0.0244309	0.329571	-0.158135	0.351704	0.0226824	0.0603233	0.341189	0.326345	0.137304	0.0197624	-0.0857441	0.274506	0.174512	0.143795	0.130432	-0.0398182	0.211307
GSM2236086	m6Acluster.B	-0.00343626	0.421481	0.449015	0.311176	0.219266	0.252414	-0.0393145	0.322807	0.00943202	0.346641	0.115088	0.0574916	0.476842	0.340396	0.178044	0.0871564	-0.116286	0.320972	0.279689	0.209643	0.191342	-0.0296323	0.187864
GSM2236087	m6Acluster.B	-0.183126	0.324801	0.317198	0.278492	0.225422	0.274271	-0.0682784	0.324414	-0.178187	0.373227	0.0482053	0.0204694	0.38568	0.308043	0.154861	0.0497525	-0.175521	0.29949	0.155082	0.141121	0.144324	-0.072466	0.17168
GSM2236088	m6Acluster.B	-0.314228	0.258251	0.25384	0.242711	0.23153	0.267542	-0.0558344	0.317151	-0.19907	0.377934	0.0693195	0.0870093	0.309961	0.300687	0.120216	0.0341038	-0.0818983	0.298724	0.177839	0.130604	0.112408	-0.0682614	0.191423
GSM2236089	m6Acluster.B	-0.125983	0.360057	0.398702	0.265964	0.251259	0.252977	-0.0171637	0.344528	-0.119346	0.37459	0.0717586	0.0860034	0.365391	0.314002	0.171191	0.00986414	-0.196124	0.302821	0.150042	0.157242	0.138974	-0.0558119	0.203978
GSM2236090	m6Acluster.B	0.105545	0.322798	0.33827	0.264895	0.225755	0.231651	0.059198	0.295958	0.0572265	0.355479	0.0394469	0.0186491	0.334509	0.32507	0.114308	0.0318598	-0.228888	0.298921	0.204056	0.151698	0.16851	-0.0787029	0.183639
GSM2236091	m6Acluster.A	-0.222259	0.255646	0.268885	0.266214	0.249219	0.260066	-0.0335241	0.319462	-0.205154	0.39295	0.0638824	0.0507664	0.310704	0.320654	0.12833	0.0313681	-0.218855	0.309813	0.140376	0.140883	0.094362	-0.113714	0.181129
GSM2236092	m6Acluster.B	-0.246009	0.279457	0.267661	0.284916	0.231031	0.2463	-0.0509466	0.304739	-0.203074	0.395524	0.0130119	0.046772	0.31954	0.341069	0.112174	0.0195118	-0.149768	0.294044	0.135789	0.129246	0.0911628	-0.0891231	0.172964
GSM2236093	m6Acluster.B	-0.215244	0.256135	0.312946	0.265767	0.235699	0.256272	-0.0262779	0.307342	-0.196381	0.360981	0.0132634	0.0860995	0.281872	0.31925	0.134424	0.0387582	-0.124169	0.307834	0.140733	0.108393	0.0987343	-0.0886262	0.161995
GSM2236094	m6Acluster.C	-0.219548	0.281195	0.310655	0.265412	0.229792	0.252788	-0.0640518	0.311956	-0.218443	0.35422	0.0423605	0.0849218	0.298384	0.325413	0.146251	0.0235294	-0.111384	0.272854	0.128656	0.112015	0.0897291	-0.0714491	0.177071
GSM2236095	m6Acluster.A	-0.231767	0.251597	0.284425	0.272901	0.223458	0.274158	-0.0399533	0.301748	-0.210488	0.351245	0.0232462	0.103365	0.294547	0.320706	0.127864	0.0467952	-0.107329	0.278425	0.126432	0.122971	0.101995	-0.112496	0.176746
GSM387788	m6Acluster.A	-0.0997469	0.126102	0.278803	0.2613	0.206294	0.255344	-0.126521	0.219789	-0.154054	0.337558	-0.000426391	-0.0741614	0.262955	0.331341	0.199106	0.0298995	-0.221825	0.319343	0.0256825	0.101358	0.0921222	-0.0455386	0.0853634
GSM387789	m6Acluster.B	-0.130504	0.319776	0.384566	0.311063	0.2048	0.26225	-0.0592609	0.326102	-0.0876675	0.346611	0.106836	0.0744287	0.422775	0.332964	0.238616	0.0636704	-0.209681	0.290424	0.229612	0.192343	0.136314	-0.0165507	0.161155
GSM387790	m6Acluster.A	-0.177372	0.0650202	0.116063	0.22559	0.225584	0.270696	-0.133761	0.196943	-0.326631	0.349667	-0.0362829	-0.0894016	0.177829	0.365126	0.150067	0.0154068	-0.114169	0.282161	-0.023886	0.134798	0.0552428	-0.0885887	-0.00469423
GSM387791	m6Acluster.A	0.35541	0.432342	0.465466	0.340705	0.249462	0.273048	-0.0595123	0.262598	0.199504	0.339563	-2.93e-05	-0.0751347	0.438581	0.365851	0.182252	0.0276979	-0.234704	0.30969	0.172223	0.186486	0.137331	-0.0559616	0.116476
GSM387792	m6Acluster.C	-0.265231	0.232055	0.232911	0.233913	0.210069	0.255386	-0.140633	0.298387	-0.260855	0.301122	-0.0138121	0.00290664	0.225426	0.333172	0.120734	0.010107	-0.157449	0.332123	0.0931997	0.135545	0.0684156	-0.0233863	0.185213
GSM387793	m6Acluster.B	-0.272817	0.0919682	0.3055	0.26405	0.162968	0.160053	-0.0971462	0.267678	-0.152914	0.378424	-0.0620317	-0.0945545	0.192595	0.289186	0.131181	0.0388348	-0.328187	0.330284	0.185398	0.168762	0.0382449	-0.0476579	0.10665
GSM387794	m6Acluster.B	-0.278552	0.104778	0.312405	0.242097	0.223325	0.228988	-0.176253	0.228741	-0.204206	0.36737	0.0549268	0.0982478	0.227409	0.310191	0.191681	0.0388832	-0.335848	0.296659	0.136435	0.122898	0.105542	-0.121006	0.138689
GSM387795	m6Acluster.B	-0.267403	0.150758	0.260052	0.184423	0.1632	0.182304	-0.101101	0.200673	-0.232888	0.359682	-0.0214419	0.0479675	0.172188	0.293058	0.168318	0.0417567	-0.329656	0.299336	0.0836486	0.0652954	0.0778233	-0.173121	0.155335
GSM387796	m6Acluster.A	-0.166898	0.190458	0.309592	0.281813	0.248132	0.339344	-0.235943	0.187997	-0.238123	0.262038	0.0256402	-0.0171122	0.180451	0.332101	0.179874	0.0231021	-0.238874	0.257393	-0.0697402	0.0728378	0.093822	-0.00373425	0.0778002
GSM387797	m6Acluster.A	-0.184533	0.243745	0.261725	0.284841	0.196082	0.268563	-0.0432359	0.215089	-0.220345	0.360963	-0.0206092	-0.0280222	0.192259	0.368972	0.170808	0.0315735	-0.12257	0.276864	0.018602	0.0657417	0.0969033	-0.0416176	0.191958
GSM387798	m6Acluster.A	-0.147028	0.124699	0.169865	0.278958	0.241616	0.30836	-0.102417	0.231644	-0.17556	0.285567	-0.0280579	-0.101132	0.201642	0.323237	0.22396	0.0567119	-0.194754	0.262122	-0.00806214	0.10799	0.0817029	-0.0682089	0.0650945
GSM387799	m6Acluster.B	-0.286676	0.385675	0.375369	0.301386	0.275882	0.222786	-0.124258	0.323995	-0.160009	0.410516	-0.0121663	-0.0199981	0.294954	0.330084	0.161147	0.092997	-0.163365	0.267468	0.162369	0.11201	0.129941	-0.0786832	0.188368
GSM387800	m6Acluster.C	-0.197169	0.181302	0.189586	0.268873	0.21857	0.270708	-0.125742	0.250522	-0.179561	0.327803	-0.0171974	-0.0527807	0.203389	0.346054	0.127546	0.000562753	-0.186171	0.308687	0.0489934	0.0863206	0.0790773	-0.0465276	0.109846
GSM387801	m6Acluster.C	-0.319735	0.262616	0.208637	0.267349	0.227926	0.282557	-0.127862	0.280924	-0.256827	0.341096	-0.00573843	-0.0632844	0.132781	0.316474	0.100363	0.00939283	-0.172125	0.275267	0.0319753	0.0691862	0.0536629	-0.0883185	0.123639
GSM387802	m6Acluster.A	0.134126	0.323361	0.391548	0.372071	0.232717	0.294863	-0.0914294	0.241074	-0.0620287	0.298263	0.0243735	-0.00556556	0.305901	0.438742	0.198351	0.109819	-0.117739	0.330857	0.0716712	0.151933	0.144886	0.034171	0.064675
GSM387803	m6Acluster.A	-0.193458	0.286447	0.188845	0.240369	0.211357	0.235344	-0.224361	0.235165	-0.230487	0.262766	-0.0795522	-0.128486	0.11863	0.333121	0.104477	0.00360351	-0.257398	0.194802	-0.0647844	0.065221	0.0622372	-0.0363556	0.0846959
GSM387804	m6Acluster.B	-0.273399	0.0729575	0.305209	0.22723	0.165705	0.197597	-0.114206	0.201506	-0.177092	0.349491	-0.0108038	0.0594973	0.309501	0.31115	0.172624	0.00443597	-0.31263	0.297132	0.126309	0.1034	0.108739	-0.144701	0.115882
GSM387805	m6Acluster.B	-0.235918	0.344658	0.311356	0.282726	0.207048	0.239652	-0.184151	0.238983	-0.165887	0.326158	0.022216	-0.0950726	0.191921	0.331585	0.118059	0.025228	-0.202219	0.271889	0.0451933	0.0810471	0.0948666	-0.0448554	0.166463
GSM387806	m6Acluster.A	0.139654	0.395821	0.453449	0.311054	0.251003	0.269544	0.0474069	0.332193	0.000921803	0.346449	0.0284731	0.140373	0.430335	0.370354	0.188177	0.0666559	-0.13441	0.308905	0.203889	0.192604	0.164699	-0.076735	0.199119
GSM387807	m6Acluster.A	-0.217245	0.222424	0.0839629	0.335995	0.197678	0.29048	-0.169266	0.32077	-0.256946	0.363021	0.0585374	-0.04159	0.258574	0.305688	0.160585	0.0223001	-0.144224	0.298165	0.0912688	0.117921	0.078947	0.0283014	0.0635605
GSM387808	m6Acluster.C	-0.328214	0.284633	0.122715	0.240857	0.163637	0.257709	-0.170847	0.312677	-0.287089	0.343477	-0.00277555	-0.065864	0.125829	0.308212	0.0973845	0.0362908	-0.160724	0.257925	0.0517706	0.106502	0.0695934	-0.102272	0.194401
GSM387809	m6Acluster.C	-0.328901	0.286087	0.142889	0.258732	0.182601	0.283076	-0.111556	0.24885	-0.271741	0.306969	-0.0690661	0.0543079	0.179986	0.3499	0.105009	0.0523729	-0.301217	0.285381	0.0245572	0.0653933	0.0621794	-0.0861239	0.192245
GSM387810	m6Acluster.C	0.226496	0.396297	0.349709	0.292263	0.245999	0.229451	-0.0331656	0.295084	0.0956145	0.32487	0.052814	-0.142923	0.307305	0.374883	0.132734	0.045661	-0.24597	0.248651	0.110684	0.15831	0.109546	-0.0893914	0.151038
GSM387811	m6Acluster.C	-0.309153	0.363847	0.204697	0.303882	0.228513	0.310248	-0.168419	0.32546	-0.1862	0.355988	-0.0130167	0.024695	0.218193	0.313451	0.180231	0.0825207	-0.1557	0.339081	0.173321	0.109495	0.103542	-0.0979319	0.154692
GSM387812	m6Acluster.B	-0.18918	0.30133	0.283719	0.326151	0.207412	0.234086	-0.0939835	0.330668	-0.139774	0.358183	0.0516284	0.0970814	0.306036	0.326143	0.177628	0.0658505	-0.174687	0.275916	0.155803	0.165212	0.106497	-0.0538399	0.118947
GSM387813	m6Acluster.B	-0.296998	0.346255	0.253817	0.277388	0.188529	0.240908	-0.248206	0.273225	-0.236561	0.308039	-0.0456621	-0.0955913	0.151664	0.31979	0.110434	0.0597272	-0.229202	0.191194	0.0616837	0.0654807	0.0827968	-0.0590333	0.151195
GSM387814	m6Acluster.B	0.109755	0.41067	0.440511	0.320528	0.224194	0.241823	0.0545131	0.293148	0.0401978	0.335055	0.0691615	0.0933902	0.430241	0.358464	0.198853	0.0635046	-0.323785	0.307322	0.200638	0.193882	0.180869	-0.0993373	0.17978
GSM387815	m6Acluster.A	-0.0528216	0.208234	0.297674	0.247349	0.260597	0.238736	-0.0458831	0.26811	-0.202935	0.3326	-0.0475883	-0.0952163	0.247903	0.333937	0.0969838	0.00129928	-0.281024	0.266579	0.0287454	0.0833922	0.0740563	-0.0569978	0.145526
GSM387816	m6Acluster.B	-0.0710497	0.408668	0.448084	0.30133	0.188935	0.198149	-0.0190067	0.287844	-0.0965191	0.348416	0.0430196	0.0111508	0.361112	0.349688	0.20831	0.0621782	-0.317121	0.301323	0.22761	0.147	0.139207	-0.0972317	0.182356
GSM387817	m6Acluster.A	-0.0851184	0.234389	0.2188	0.234607	0.201624	0.258858	-0.0900227	0.28078	-0.224502	0.321143	-0.0519162	-0.064783	0.206217	0.349876	0.0804605	-0.00357073	-0.190082	0.257339	0.0448686	0.0647681	0.0529362	-0.0773961	0.116296
GSM387818	m6Acluster.B	-0.274417	0.240818	0.212558	0.263347	0.166941	0.253511	-0.19984	0.274923	-0.259487	0.300863	-0.0515872	-0.0438124	0.196928	0.334207	0.0981065	0.0105633	-0.175197	0.251283	0.0858724	0.0408091	0.0547445	-0.0788594	0.0938616
GSM387819	m6Acluster.A	-0.193742	0.204308	0.269582	0.334839	0.239995	0.306435	0.0439796	0.334813	-0.224307	0.389236	0.129705	0.230355	0.39966	0.39981	0.225556	0.107258	-0.0357091	0.369889	0.257417	0.217493	0.155982	-0.0631756	0.078893
GSM387820	m6Acluster.A	-0.0569748	0.310746	0.319341	0.294176	0.207465	0.25022	-0.0221981	0.284162	-0.171246	0.375843	0.0149775	0.0148269	0.316297	0.327314	0.129361	0.017706	-0.1419	0.277618	0.103077	0.104507	0.0807181	-0.0539818	0.154207
GSM387821	m6Acluster.B	-0.0529923	0.179588	0.292421	0.224943	0.256791	0.232742	0.0373248	0.282015	-0.130563	0.336274	-0.0659026	0.0442113	0.208411	0.314287	0.120494	-0.0163439	-0.184152	0.289324	0.0649508	0.0906935	0.086781	-0.101601	0.167944
GSM387822	m6Acluster.B	-0.345888	0.215004	0.16752	0.331084	0.193786	0.279241	-0.19208	0.306699	-0.223328	0.37524	0.0454863	-0.0429946	0.271783	0.326182	0.16564	0.0510515	-0.23723	0.270089	0.144613	0.124428	0.0809743	-0.0332753	0.107222
GSM387823	m6Acluster.C	-0.271435	0.28171	0.28087	0.279845	0.221573	0.267974	-0.180774	0.329135	-0.209568	0.350287	0.0486613	0.00761491	0.309894	0.296399	0.1557	0.0465324	-0.280283	0.307153	0.184566	0.165124	0.0947135	-0.115957	0.0926088
GSM387824	m6Acluster.B	-0.198298	0.198218	0.351373	0.298829	0.211364	0.179325	0.0176959	0.357027	-0.125768	0.381701	0.137575	0.301001	0.436348	0.373895	0.187558	0.0773379	-0.0921327	0.323148	0.283121	0.153218	0.11663	-0.205139	0.163672
GSM387825	m6Acluster.C	-0.0200837	0.242211	0.315668	0.286151	0.240983	0.269018	-0.0790119	0.304017	-0.118586	0.326043	0.0628476	0.0232883	0.324646	0.355081	0.160129	0.0380459	-0.194544	0.328602	0.152853	0.151846	0.0916822	-0.0925898	0.0965642
GSM387826	m6Acluster.B	-0.1541	0.117042	0.348096	0.217843	0.164644	0.165172	-0.0481898	0.24366	-0.0980818	0.328762	0.00830049	0.114643	0.275835	0.304741	0.180477	0.0406598	-0.333555	0.298841	0.154749	0.143476	0.113102	-0.170916	0.141719
GSM387827	m6Acluster.B	-0.280915	0.160309	0.213207	0.246214	0.158028	0.186755	-0.0904783	0.280462	-0.204488	0.332495	0.0178536	0.137449	0.289269	0.30171	0.182878	0.0328429	-0.163089	0.31244	0.182445	0.109371	0.0514686	-0.118989	0.12477
GSM387828	m6Acluster.C	-0.188415	0.406564	0.403777	0.360711	0.210026	0.2702	-0.143754	0.372117	-0.094359	0.360763	0.0609029	-0.0253929	0.374111	0.321981	0.171138	0.109218	-0.304898	0.274454	0.310044	0.170868	0.0949415	-0.0507118	0.0908847
GSM387829	m6Acluster.A	0.226909	0.256155	0.361496	0.290262	0.24116	0.259176	0.0417217	0.350294	0.0322933	0.357811	0.0362454	0.106001	0.378711	0.333413	0.172762	0.0122764	-0.0884566	0.308273	0.179984	0.163346	0.124344	-0.0837458	0.118613
GSM387830	m6Acluster.B	-0.175889	0.345758	0.410974	0.322484	0.235661	0.27329	-0.120936	0.282477	-0.18972	0.329121	0.0398532	-0.00559611	0.351498	0.359931	0.185003	0.0512984	-0.217268	0.3022	0.210155	0.155711	0.11842	-0.0326839	0.13565
GSM387831	m6Acluster.C	-0.130151	0.314334	0.278893	0.290758	0.224799	0.260257	-0.0483446	0.268654	-0.192813	0.345865	0.0254395	0.0627777	0.289171	0.317837	0.133844	0.0167475	-0.114266	0.294095	0.150961	0.124016	0.0685409	-0.0875647	0.168306
GSM387832	m6Acluster.B	0.0218076	0.181017	0.316367	0.266558	0.234082	0.214288	0.027645	0.290361	-0.01965	0.316918	0.0600515	0.162183	0.29768	0.322787	0.141487	0.0342114	-0.207307	0.358344	0.179989	0.201336	0.142919	-0.0822179	0.121677
GSM387833	m6Acluster.C	-0.2902	0.172063	0.188556	0.257383	0.231743	0.314719	-0.230104	0.336363	-0.260691	0.342057	0.0192679	-0.0463329	0.247091	0.32495	0.132269	0.042847	-0.324557	0.260305	0.0877619	0.145223	0.0701363	-0.0921964	0.0926673
GSM387834	m6Acluster.B	-0.218025	0.234742	0.290948	0.263226	0.267223	0.229452	-0.0380936	0.265885	-0.223218	0.363606	0.053326	0.185339	0.260393	0.31336	0.176029	0.0409193	-0.305799	0.315141	0.159321	0.1486	0.117012	-0.0988923	0.213983
GSM387835	m6Acluster.B	0.0451706	0.422829	0.450804	0.420695	0.235221	0.266754	-0.0279303	0.362521	0.0680332	0.407384	0.222199	0.112647	0.538199	0.35354	0.218461	0.0942061	0.121175	0.371415	0.329074	0.247005	0.201477	-0.0395024	0.129525
GSM387836	m6Acluster.B	-0.292085	0.262503	0.252279	0.246796	0.195457	0.212323	-0.0508211	0.234155	-0.215847	0.323854	0.0164374	0.00451023	0.215159	0.30618	0.167313	0.0254909	-0.231707	0.281843	0.0606366	0.112796	0.0978291	-0.0753232	0.148837
GSM387837	m6Acluster.B	-0.311448	0.236474	0.268195	0.232526	0.210754	0.235641	-0.0552637	0.251715	-0.248018	0.313475	0.0392718	0.0248155	0.212265	0.27962	0.154816	0.0430941	-0.311408	0.303442	0.0658807	0.120301	0.0947674	-0.0383598	0.184031
GSM387838	m6Acluster.B	-0.223145	0.159501	0.292078	0.322457	0.216676	0.170518	0.058518	0.352445	-0.127419	0.391163	0.13894	0.305647	0.404022	0.331351	0.20344	0.0615575	0.0750362	0.379662	0.238753	0.160674	0.144949	-0.212912	0.153122
GSM387839	m6Acluster.C	-0.263532	0.300334	0.366829	0.297608	0.215723	0.27496	-0.196387	0.320396	-0.181014	0.324778	0.0246545	-0.0991585	0.343172	0.346226	0.148164	0.062319	-0.2418	0.281249	0.167965	0.101343	0.0838876	-0.0754959	0.158375
GSM387840	m6Acluster.B	-0.256632	0.0163818	0.267163	0.215052	0.16525	0.180834	-0.0364854	0.234899	-0.226219	0.359255	0.0239046	0.207629	0.233804	0.311408	0.183764	0.040477	-0.298216	0.315281	0.155307	0.086	0.0725964	-0.195596	0.124512
GSM387841	m6Acluster.B	0.0492585	0.292934	0.399362	0.322335	0.222969	0.233438	0.0684137	0.357058	-0.0123155	0.381838	0.117342	0.187589	0.464729	0.355756	0.208897	0.112881	-0.195445	0.347296	0.320236	0.233109	0.174495	-0.0857427	0.150046
GSM387842	m6Acluster.C	-0.286508	0.315289	0.32663	0.286667	0.171418	0.259599	-0.0877392	0.316286	-0.168278	0.362935	-0.0121783	-0.0344073	0.325584	0.319581	0.148147	0.0816576	-0.259233	0.264584	0.174616	0.134579	0.109465	-0.105723	0.268219
GSM387843	m6Acluster.C	-0.268151	0.20884	0.255863	0.211631	0.221959	0.277913	-0.196848	0.256289	-0.274253	0.278397	-0.0462102	-0.122101	0.181559	0.32838	0.11426	-0.00326567	-0.294375	0.273272	0.12878	0.135448	0.0329332	-0.18507	0.146487
GSM387844	m6Acluster.C	-0.226964	0.243614	0.335459	0.235762	0.236715	0.255274	-0.147075	0.244149	-0.250448	0.338102	-0.0455315	-0.0362172	0.140508	0.307381	0.109373	0.0145087	-0.269964	0.220035	0.0110447	0.0828426	0.0410436	-0.137889	0.11475
GSM387845	m6Acluster.B	-0.177375	0.299717	0.275875	0.268851	0.254025	0.266217	-0.0586787	0.330228	-0.145336	0.382909	0.0727642	0.0820114	0.326562	0.317159	0.177259	0.089538	-0.28756	0.311028	0.162665	0.143789	0.131391	-0.0573306	0.209765
GSM387846	m6Acluster.B	-0.263205	0.333511	0.325477	0.337781	0.205635	0.31019	-0.13336	0.346421	-0.176964	0.328581	0.0368054	0.0500552	0.364658	0.341401	0.189165	0.0741296	-0.193906	0.254817	0.207776	0.142708	0.127071	-0.048011	0.168418
GSM387847	m6Acluster.B	-0.251997	0.0887222	0.321124	0.244025	0.253528	0.221685	0.0730978	0.298347	-0.146187	0.374386	0.0891785	0.271423	0.307692	0.342482	0.165329	0.0515767	-0.0998131	0.34833	0.19441	0.196143	0.115081	-0.181437	0.101368
GSM387848	m6Acluster.A	0.0837537	0.334012	0.440736	0.358767	0.269051	0.290594	0.0390551	0.313386	-0.067064	0.365281	0.0775833	0.117578	0.436291	0.372264	0.195496	0.0495006	-0.15343	0.342583	0.197352	0.173931	0.170101	-0.05026	0.153599
GSM387849	m6Acluster.A	-0.282889	0.24494	0.271996	0.315457	0.251454	0.276889	-0.0465524	0.375479	-0.195652	0.38182	0.136283	0.210782	0.366842	0.371885	0.178771	0.0931083	-0.106905	0.352442	0.286669	0.16674	0.144627	-0.117047	0.127747
GSM387850	m6Acluster.A	0.0604655	0.284274	0.406332	0.30933	0.244011	0.240764	0.0389294	0.34442	0.000478186	0.368488	0.116687	0.257437	0.447127	0.359888	0.197905	0.092949	-0.174729	0.346418	0.260659	0.207574	0.171524	-0.136475	0.14751
GSM387851	m6Acluster.A	-0.224576	0.154653	0.289732	0.280235	0.198134	0.234802	-0.123731	0.249587	-0.188912	0.385753	0.0626024	0.0593419	0.368819	0.353996	0.196659	0.0559822	-0.291519	0.331613	0.18249	0.157435	0.107366	-0.0991102	0.14829
GSM387852	m6Acluster.C	-0.349368	0.136051	0.233397	0.297804	0.237289	0.276503	-0.140294	0.348238	-0.256078	0.347701	0.100079	0.0976685	0.346656	0.340455	0.163112	0.085303	-0.167891	0.341194	0.206978	0.155332	0.10281	-0.0773157	0.109477
GSM387853	m6Acluster.B	-0.195063	0.110923	0.281883	0.262568	0.166984	0.187292	0.00392317	0.246692	-0.129877	0.344881	0.0468303	0.207507	0.300795	0.321329	0.188807	0.0353707	-0.259925	0.304312	0.179738	0.109395	0.090949	-0.18651	0.124563
GSM387854	m6Acluster.C	-0.264699	0.232468	0.240408	0.207308	0.221021	0.222976	-0.10187	0.296665	-0.318024	0.276249	-0.0507102	-0.128409	0.0976239	0.336303	0.0573726	-0.0624185	-0.358536	0.228905	0.0509042	0.0397089	0.00861935	-0.221963	0.160069
GSM387855	m6Acluster.C	-0.352808	0.229501	0.135216	0.210631	0.170457	0.263382	-0.279709	0.24089	-0.267912	0.31614	-0.0980932	-0.097863	0.0994178	0.320709	0.0729754	0.021924	-0.288392	0.269843	-0.00300161	0.0667246	0.054443	-0.0769969	0.134788
GSM387856	m6Acluster.A	-0.286001	0.326377	0.287432	0.397592	0.219258	0.313437	-0.0765252	0.368708	-0.155509	0.387368	0.171655	0.111958	0.390377	0.344404	0.204093	0.0762519	0.101778	0.349958	0.288375	0.20373	0.149067	-0.0647671	0.128365
GSM387857	m6Acluster.A	0.130898	0.255324	0.344144	0.264157	0.230333	0.244675	0.0727712	0.230743	0.00289063	0.338973	0.0279554	0.143979	0.357451	0.359623	0.187848	0.0672813	-0.264418	0.34884	0.201467	0.144908	0.17816	-0.145639	0.14512
GSM387858	m6Acluster.C	-0.273769	0.244311	0.355457	0.264323	0.25138	0.285371	-0.0205808	0.280636	-0.184879	0.34771	0.0948286	0.0894606	0.367822	0.320946	0.155181	0.0628281	-0.229766	0.328761	0.221008	0.178619	0.104183	-0.0950737	0.147276
GSM387859	m6Acluster.A	0.107856	0.347254	0.478099	0.376773	0.211515	0.295878	0.0236978	0.393406	0.0355302	0.348981	0.195703	0.146019	0.536149	0.402258	0.237845	0.132069	0.0177828	0.391933	0.334255	0.199539	0.19668	-0.135825	0.100646
GSM387860	m6Acluster.A	0.0588477	0.304136	0.391876	0.343653	0.253783	0.289834	0.0412531	0.308492	-0.0655488	0.378781	0.096229	0.127422	0.474817	0.379662	0.174849	0.0851826	-0.150346	0.321167	0.222628	0.187644	0.189732	-0.0476136	0.158521
GSM387861	m6Acluster.C	-0.290531	0.346643	0.238402	0.273182	0.221398	0.296662	-0.116449	0.345211	-0.186591	0.338319	0.0537358	0.0542667	0.257118	0.331316	0.132043	0.0352458	-0.303607	0.285844	0.122025	0.129404	0.0905067	-0.0171725	0.258945
GSM387862	m6Acluster.A	-0.0930707	0.24347	0.316506	0.318545	0.220161	0.252948	-0.106799	0.32026	-0.124794	0.360967	0.0964337	0.11146	0.417227	0.343064	0.196485	0.0742923	-0.0997285	0.359432	0.244312	0.14719	0.164206	-0.0847411	0.152723
GSM387863	m6Acluster.A	0.0685076	0.25892	0.29528	0.341651	0.202354	0.273972	0.00064524	0.3468	-0.0939042	0.347271	0.104948	0.237382	0.383676	0.354146	0.183439	0.0909296	-0.0343183	0.396485	0.211031	0.159412	0.169552	-0.139423	0.143965
GSM387864	m6Acluster.A	-0.120031	0.211659	0.26222	0.344668	0.2055	0.336291	-0.147033	0.197506	-0.219114	0.324235	0.0485825	0.0364781	0.245132	0.438287	0.20208	0.0750415	-0.135373	0.284418	0.0754293	0.165344	0.113065	0.0181091	-0.0194729
GSM387865	m6Acluster.C	-0.281423	0.247635	0.188665	0.252235	0.244438	0.285388	-0.0372456	0.303412	-0.242946	0.32563	0.0796173	-0.00229518	0.267729	0.29491	0.154189	0.0583832	-0.306355	0.290438	0.144379	0.109759	0.0550046	-0.0737297	0.118519
GSM387866	m6Acluster.B	-0.200686	0.194348	0.351388	0.332021	0.256002	0.265384	-0.031493	0.380276	-0.125697	0.389577	0.114976	0.185825	0.422006	0.358859	0.178586	0.0798768	-0.0103006	0.39068	0.218161	0.216398	0.133176	-0.105669	0.112216
GSM387867	m6Acluster.B	-0.0586478	0.274389	0.242466	0.301817	0.23815	0.259161	0.0249707	0.322487	-0.143561	0.359976	0.038021	0.0712481	0.338688	0.34253	0.127882	0.0343301	-0.185993	0.29377	0.144686	0.119339	0.116467	-0.0315172	0.190043
GSM387868	m6Acluster.B	-0.128182	0.322297	0.323823	0.376753	0.224215	0.25303	0.0367111	0.361969	-0.0294776	0.395768	0.199591	0.219625	0.480584	0.363685	0.212694	0.113063	0.0615294	0.391528	0.378914	0.21235	0.184301	-0.0817283	0.169257
GSM387869	m6Acluster.B	-0.16824	0.261793	0.305877	0.252855	0.225644	0.232656	-0.101844	0.286901	-0.197534	0.334349	0.0237978	0.0561823	0.332759	0.324691	0.167016	0.0149108	-0.293531	0.292617	0.138768	0.126968	0.0971394	-0.0671455	0.143013
GSM387870	m6Acluster.B	-0.1874	0.292586	0.351878	0.260572	0.227198	0.269102	-0.0778992	0.286452	-0.185801	0.35772	0.0289663	0.0880811	0.331332	0.344608	0.175502	0.0577644	-0.192625	0.315307	0.123013	0.128696	0.135204	-0.0727775	0.20421
GSM387871	m6Acluster.B	-0.144061	0.301511	0.321488	0.270953	0.227396	0.216857	-0.103761	0.275585	-0.203601	0.298903	-0.0229234	-0.0540221	0.272197	0.328053	0.117888	0.0242694	-0.262352	0.250981	0.0511247	0.08744	0.0733305	-0.0994654	0.169293
GSM387872	m6Acluster.C	-0.231805	0.260774	0.269331	0.245235	0.224407	0.270625	-0.0654192	0.351226	-0.207424	0.305279	0.065217	0.0838533	0.279819	0.35023	0.134847	0.039235	-0.160565	0.281606	0.150187	0.133815	0.0624473	-0.0527081	0.148358
GSM387873	m6Acluster.A	0.149906	0.268693	0.331459	0.340094	0.222596	0.266489	-0.103226	0.249836	-0.0994501	0.301555	0.026687	0.008861	0.352742	0.401601	0.185968	0.0657931	-0.159792	0.340348	0.114936	0.181144	0.130397	-0.0287173	0.000227019
GSM387874	m6Acluster.A	-0.248154	0.259803	0.248122	0.324441	0.236425	0.289915	-0.0493728	0.309419	-0.175363	0.363994	0.0675827	0.106184	0.34424	0.327751	0.190106	0.0787863	-0.148806	0.306941	0.217206	0.16681	0.127737	-0.0672237	0.124482
GSM387875	m6Acluster.B	-0.265907	0.239982	0.295361	0.263423	0.195994	0.212291	-0.039509	0.316823	-0.212441	0.359141	0.0252813	0.171601	0.32245	0.301484	0.150831	0.0468983	-0.250622	0.315967	0.189679	0.138683	0.0927878	-0.15319	0.127996
GSM387876	m6Acluster.B	-0.0448675	0.296583	0.435983	0.285178	0.252883	0.230554	0.0233702	0.261936	-0.0302534	0.356535	0.0661733	0.194185	0.43405	0.352987	0.179811	0.0551251	-0.336852	0.32655	0.202828	0.207827	0.165166	-0.103826	0.138815
GSM387877	m6Acluster.A	0.0260655	0.43703	0.540085	0.341402	0.260058	0.287296	-0.0651029	0.324968	-0.0274677	0.386035	0.112272	0.094975	0.497791	0.407584	0.236657	0.0829208	-0.125451	0.312273	0.286225	0.239163	0.185423	-0.0230819	0.160266
GSM387878	m6Acluster.A	-0.269352	0.153749	0.12517	0.267087	0.239425	0.247361	-0.0471143	0.251892	-0.199717	0.36739	0.0359826	0.13927	0.269893	0.31768	0.169865	0.0235009	-0.157547	0.317298	0.123596	0.0933748	0.0820682	-0.102412	0.13209
GSM387879	m6Acluster.A	-0.0531659	0.218665	0.323889	0.267443	0.262562	0.259133	-0.0196989	0.269741	-0.186991	0.359216	-0.0438247	-0.00729588	0.270308	0.335198	0.124714	-0.00442265	-0.232361	0.274444	0.049712	0.0972893	0.0865812	-0.0415533	0.141812
GSM387880	m6Acluster.B	-0.134036	0.168226	0.331912	0.25348	0.241487	0.208092	-0.0398343	0.25501	-0.162838	0.364317	0.0212837	0.123723	0.344676	0.324503	0.15316	0.0365525	-0.268105	0.329302	0.149558	0.139246	0.121839	-0.106049	0.159745
GSM387881	m6Acluster.B	-0.275067	0.172296	0.188816	0.1936	0.173053	0.256456	-0.0571893	0.260929	-0.24861	0.327478	-0.000798918	0.0432005	0.24448	0.305809	0.149625	0.00215028	-0.225911	0.300253	0.0783852	0.0973528	0.0867653	-0.0942301	0.149908
GSM387882	m6Acluster.A	-0.0845527	0.292726	0.275515	0.300521	0.230568	0.296087	-0.0559061	0.27422	-0.188354	0.32858	0.0205136	0.0167947	0.303022	0.350439	0.163411	0.0573586	-0.124796	0.282284	0.127609	0.114093	0.108813	-0.0697412	0.173431
GSM387883	m6Acluster.A	0.0775649	0.297262	0.314134	0.31708	0.262471	0.306204	-0.0272077	0.307995	-0.0898865	0.342971	0.0272777	-0.0333159	0.323739	0.352067	0.151758	0.0316434	-0.207472	0.28282	0.186674	0.151338	0.10592	-0.0228395	0.137615
GSM387884	m6Acluster.A	-0.124479	0.246131	0.288031	0.294557	0.239065	0.269421	-0.020498	0.337428	-0.150763	0.368548	0.0384869	-0.0379812	0.292757	0.363378	0.139542	0.00145209	-0.0620558	0.301151	0.122542	0.121932	0.0950229	-0.0695919	0.136341
GSM387885	m6Acluster.A	0.369263	0.361138	0.415918	0.329647	0.271473	0.284271	0.0102207	0.295187	0.200415	0.357291	0.0116767	-0.0551852	0.404075	0.422049	0.172173	0.0598757	-0.186506	0.30359	0.164067	0.159586	0.165547	-0.0948011	0.118273
GSM387886	m6Acluster.A	-0.0612282	0.354685	0.399341	0.335497	0.238477	0.294842	-0.0379249	0.356367	-0.0767144	0.348287	0.0535212	0.0657627	0.391447	0.348435	0.176819	0.0534921	-0.0981631	0.312688	0.197702	0.154159	0.138288	-0.0525893	0.188663
GSM387887	m6Acluster.A	0.113433	0.357608	0.442188	0.312634	0.248171	0.262237	0.0954947	0.296531	0.0271944	0.354263	0.0775929	0.0770409	0.429465	0.356089	0.186966	0.0632205	-0.244322	0.290243	0.195587	0.149927	0.140048	-0.0660133	0.171449
GSM387888	m6Acluster.A	-0.260618	0.0923598	0.15215	0.223305	0.202969	0.260966	-0.0367897	0.223667	-0.259821	0.312654	-0.0243448	0.0519353	0.22371	0.316223	0.148064	0.0318889	-0.283554	0.280962	0.0840671	0.111184	0.0984615	-0.0645834	0.116094
GSM387889	m6Acluster.A	0.0176898	0.309251	0.293088	0.307032	0.274347	0.28367	-0.0239082	0.29402	-0.0649429	0.356249	-0.00412418	0.110371	0.313654	0.357562	0.152632	0.0642069	-0.184092	0.329205	0.149142	0.132341	0.135779	-0.0667494	0.201241
GSM387890	m6Acluster.C	-0.0102701	0.355525	0.272658	0.25524	0.196281	0.262098	-0.126625	0.251849	-0.117075	0.339337	-0.068538	-0.113556	0.176885	0.333716	0.0881453	0.0668674	-0.278258	0.258801	0.0371052	0.0835693	0.059166	-0.0699371	0.156003
GSM387891	m6Acluster.A	0.000233473	0.302236	0.373568	0.274122	0.265567	0.238085	0.0356513	0.264795	-0.11806	0.3286	0.0133751	0.0741986	0.33368	0.363901	0.139532	-0.010164	-0.314813	0.27412	0.121775	0.12158	0.121559	-0.068396	0.113862
GSM387892	m6Acluster.B	-0.267758	0.19635	0.159783	0.251271	0.230715	0.282979	-0.133657	0.302732	-0.256691	0.329372	0.0140102	0.00505509	0.17493	0.301127	0.151511	0.0441556	-0.288381	0.272701	0.0623729	0.117174	0.0917445	-0.0206369	0.15169
GSM387893	m6Acluster.A	-0.0186961	0.139745	0.237895	0.291128	0.262873	0.261417	-0.028645	0.306715	-0.127836	0.35954	0.0255609	0.104746	0.323357	0.348426	0.122117	0.0280963	-0.14774	0.32484	0.152728	0.161526	0.108666	-0.0442531	0.103763
GSM387894	m6Acluster.C	-0.283928	0.290822	0.229088	0.326091	0.255424	0.253894	-0.145331	0.349932	-0.21885	0.343378	0.050966	-0.00436142	0.276262	0.340906	0.105679	0.0354701	-0.100477	0.26589	0.106451	0.0825913	0.0814216	0.0074819	0.161105
GSM387895	m6Acluster.B	-0.062684	0.336012	0.383885	0.327831	0.237431	0.223871	-0.0258278	0.296845	-0.12762	0.352504	0.0280756	0.0719842	0.367659	0.330917	0.149939	0.0268541	-0.0935408	0.289272	0.158513	0.108056	0.132867	-0.0250349	0.164339
GSM387896	m6Acluster.C	-0.331248	0.233266	0.138462	0.276724	0.212959	0.269705	-0.206704	0.291258	-0.252103	0.339588	-0.00260436	0.0392011	0.278652	0.35737	0.147583	0.0350135	-0.217329	0.277877	0.112843	0.13	0.0832246	-0.0471061	0.202924
GSM387897	m6Acluster.A	0.0385189	0.294507	0.382675	0.272629	0.24924	0.245904	-0.0657281	0.291474	-0.0707651	0.351334	-0.00370707	-0.0342645	0.333178	0.347286	0.13822	0.0125877	-0.29203	0.279213	0.151456	0.127959	0.114209	-0.0700489	0.166578
GSM387898	m6Acluster.B	-0.0899348	0.19569	0.311103	0.247335	0.173314	0.190213	-0.0789906	0.199029	-0.136891	0.346673	-0.0035538	0.109827	0.307715	0.305676	0.169976	0.0529573	-0.340533	0.306248	0.14733	0.121562	0.133196	-0.129231	0.130056
GSM387899	m6Acluster.B	-0.179638	0.16197	0.252617	0.23322	0.216394	0.217296	-0.108513	0.264338	-0.173988	0.35236	-0.0176457	0.0836771	0.256336	0.351514	0.135502	0.0431013	-0.293588	0.335567	0.100085	0.138285	0.134371	-0.0830334	0.122315
GSM387900	m6Acluster.A	-0.00272383	0.278023	0.36031	0.238763	0.251021	0.267082	0.0269611	0.294487	-0.149638	0.322762	-0.0512959	-0.0147934	0.278467	0.353018	0.104449	0.000325297	-0.159857	0.272271	0.0651917	0.111977	0.0853544	-0.085041	0.165571
GSM387901	m6Acluster.C	-0.340881	0.236988	0.156431	0.22229	0.210403	0.265502	-0.111364	0.266894	-0.291938	0.28342	-0.0651617	0.0317073	0.101509	0.293613	0.0920733	-0.00560521	-0.268186	0.242804	-0.00714497	0.0404133	0.016855	-0.0539718	0.152125
GSM387902	m6Acluster.A	0.353252	0.286207	0.422237	0.290278	0.234883	0.259834	0.012254	0.273616	0.160899	0.322827	0.00814581	-0.0245294	0.365006	0.409064	0.146537	0.00621341	-0.266444	0.31619	0.193393	0.16733	0.140158	-0.047678	0.094563
GSM387903	m6Acluster.C	-0.406215	0.182693	0.147641	0.16708	0.204734	0.236483	-0.199039	0.287614	-0.287213	0.261917	-0.082063	-0.105157	0.0473915	0.337329	0.0797064	0.00278597	-0.265978	0.173036	-0.0569177	0.0556999	-0.00768062	-0.0769064	0.133812
GSM387904	m6Acluster.C	-0.237379	0.247698	0.163059	0.27618	0.296958	0.232661	-0.104214	0.270755	-0.273181	0.320607	-0.0605888	-0.0570383	0.238417	0.368797	0.100201	0.006002	-0.177399	0.284198	0.06031	0.0848611	0.0348205	-0.0769287	0.145815
GSM387905	m6Acluster.B	-0.200765	0.318673	0.396259	0.310866	0.224824	0.246225	-0.0819123	0.349856	-0.145807	0.407704	0.132315	0.152753	0.436807	0.34776	0.207355	0.0864936	-0.186369	0.337851	0.252879	0.211806	0.160183	-0.0937287	0.202986
GSM387906	m6Acluster.A	-0.231296	0.210029	0.286462	0.267151	0.264511	0.245576	-0.125353	0.284201	-0.241942	0.361748	0.0142677	0.0655966	0.29702	0.337628	0.142652	0.0272933	-0.217271	0.291122	0.12659	0.122417	0.121717	-0.0681173	0.18767
GSM387907	m6Acluster.A	-0.233147	0.125548	0.181983	0.281567	0.22646	0.279676	-0.146031	0.301911	-0.244465	0.346959	0.00534295	-0.0417087	0.274035	0.377458	0.131746	0.0638071	-0.174723	0.28746	0.10542	0.0980609	0.0479624	-0.0692818	0.0313046
GSM387908	m6Acluster.C	-0.30626	0.254331	0.203007	0.321514	0.191238	0.278785	-0.12726	0.34047	-0.231811	0.316899	0.0425143	0.105528	0.328765	0.308445	0.135566	0.0669083	-0.209559	0.255898	0.211509	0.134993	0.097635	0.00227719	0.101631
GSM387909	m6Acluster.B	-0.201286	0.179764	0.282161	0.238966	0.186491	0.25456	0.00997367	0.248036	-0.199793	0.294666	-0.0186502	0.0616757	0.258799	0.346884	0.149319	0.0014066	-0.276826	0.313883	0.132969	0.145718	0.0915011	-0.0449927	0.0894176
GSM387910	m6Acluster.A	-0.167073	0.231836	0.315641	0.245895	0.229123	0.253983	-0.0846553	0.2739	-0.23051	0.334217	-0.0251435	0.00328187	0.238179	0.31701	0.129034	0.0290491	-0.190724	0.269099	0.0760958	0.103161	0.0842443	-0.0659803	0.169229
GSM387911	m6Acluster.B	0.0954941	0.379318	0.441473	0.303472	0.2332	0.268157	0.0154822	0.331283	-0.000572169	0.361816	0.112263	0.0798202	0.40435	0.376997	0.170437	0.0739758	-0.254779	0.309656	0.260766	0.206807	0.160051	-0.0639786	0.169715
GSM387912	m6Acluster.B	-0.113176	0.240654	0.238707	0.262358	0.234443	0.266744	0.0316994	0.334165	-0.193678	0.347021	0.012934	0.0710623	0.295154	0.349557	0.137108	0.0309495	-0.0407741	0.302315	0.109256	0.117729	0.107568	-0.0530079	0.156782
GSM387913	m6Acluster.C	-0.200214	0.305274	0.241513	0.227017	0.17934	0.244446	-0.0737947	0.228236	-0.238067	0.325785	-0.0761131	0.045623	0.230322	0.305533	0.0798867	0.00522794	-0.189195	0.207708	0.0316522	0.0577801	0.0509015	-0.0792511	0.119934
GSM387914	m6Acluster.C	-0.298041	0.271158	0.150254	0.331036	0.245186	0.26402	-0.169084	0.367542	-0.197636	0.392157	0.144582	-0.0188817	0.342598	0.363923	0.163409	0.0489436	-0.216771	0.325978	0.275895	0.15803	0.120658	-0.101923	0.117815
GSM387915	m6Acluster.B	-0.0159958	0.321555	0.393414	0.285137	0.226835	0.261991	0.00914272	0.320716	-0.0813446	0.357533	0.0955364	0.097957	0.397768	0.341842	0.175143	0.0783513	-0.252548	0.312277	0.201873	0.145781	0.129685	-0.0725243	0.184567
GSM387916	m6Acluster.C	-0.0296656	0.183132	0.249531	0.196215	0.222539	0.280652	-0.0314379	0.24534	-0.135783	0.263847	-0.0960079	-0.0961879	0.136671	0.335915	0.092697	-0.00901866	-0.233968	0.304045	0.00674966	0.0891441	0.0493219	-0.0645959	0.0452697
GSM387917	m6Acluster.B	-0.226131	0.237782	0.193649	0.311111	0.244587	0.245539	-0.0915217	0.254905	-0.245633	0.340611	0.022749	0.0597234	0.239683	0.334559	0.0939351	0.011266	-0.155036	0.256489	0.03313	0.0786745	0.0713679	0.0249763	0.150323
GSM387918	m6Acluster.A	-0.141314	0.243834	0.216867	0.236325	0.24078	0.283333	0.00851134	0.272901	-0.17601	0.340852	-0.0218841	0.0145236	0.224135	0.345725	0.141428	0.00655041	-0.105516	0.286919	0.0467638	0.0985258	0.0886925	-0.0413637	0.167816
GSM387919	m6Acluster.B	-0.145634	0.28096	0.287111	0.3478	0.236424	0.278934	-0.0682935	0.329659	-0.0987547	0.401718	0.16666	0.114118	0.448174	0.351785	0.196693	0.0854403	-0.0590771	0.324008	0.25997	0.186878	0.139758	-0.0885753	0.169628
GSM387920	m6Acluster.C	-0.230731	0.283275	0.234501	0.198951	0.208518	0.261734	-0.0963282	0.273221	-0.256195	0.307686	-0.0415014	-0.0442336	0.202026	0.301033	0.0763498	0.00548501	-0.222606	0.253765	0.0591368	0.0902055	0.0715867	-0.0949084	0.189576
GSM387921	m6Acluster.C	0.0333006	0.383709	0.358446	0.290787	0.263163	0.280921	-0.0214688	0.311056	-0.103247	0.341116	0.0177871	0.0492723	0.335397	0.324479	0.131243	0.0647674	-0.197072	0.263666	0.134786	0.155088	0.116241	-0.0715093	0.167855
GSM387922	m6Acluster.B	-0.26284	0.378936	0.351359	0.278612	0.20651	0.234843	-0.107166	0.311028	-0.227587	0.295952	0.0104808	-0.0602055	0.23322	0.31321	0.14441	0.0725104	-0.284493	0.232114	0.135264	0.0996815	0.0855763	-0.0430427	0.149443
GSM387923	m6Acluster.C	-0.329792	0.14285	0.192255	0.223085	0.240476	0.227642	-0.149259	0.340233	-0.262199	0.326117	-0.00289425	-0.046392	0.230838	0.378985	0.142996	0.0518724	-0.154392	0.316545	0.140001	0.132176	0.0912518	-0.0494331	0.0924463
GSM387924	m6Acluster.A	0.0044031	0.306174	0.362902	0.271081	0.249234	0.265873	-0.0622583	0.254849	-0.117056	0.344339	-0.0319886	-0.0309418	0.269954	0.342369	0.132214	0.0256942	-0.214297	0.301016	0.0728695	0.0903436	0.100908	-0.070816	0.170862
GSM387925	m6Acluster.B	0.0294722	0.298889	0.373052	0.277195	0.240004	0.226608	0.0441132	0.2699	-0.0835921	0.33787	0.0526892	0.115765	0.372228	0.353775	0.163957	0.0341173	-0.238071	0.301834	0.139846	0.157534	0.153386	-0.0426421	0.16134
GSM387926	m6Acluster.C	-0.256921	0.288092	0.245944	0.273903	0.242314	0.263494	-0.142392	0.32135	-0.199828	0.344171	0.0276691	-0.0169517	0.179867	0.309132	0.10023	0.02998	-0.217193	0.301298	0.0542436	0.129617	0.0768067	-0.0199023	0.174177
GSM387927	m6Acluster.B	-0.1404	0.384461	0.433983	0.342891	0.211443	0.242965	-0.0714306	0.310343	-0.117764	0.305641	0.0619706	0.129909	0.384619	0.31831	0.179327	0.0888098	-0.275963	0.26649	0.233339	0.15096	0.132831	-0.0792987	0.148765
GSM387928	m6Acluster.B	0.0219299	0.456459	0.501267	0.364879	0.254582	0.287609	-0.0114829	0.371773	0.0175687	0.352732	0.116107	-0.0286386	0.454511	0.355572	0.203347	0.0810018	-0.103924	0.334102	0.229785	0.171973	0.167701	-0.0134497	0.204638
GSM387929	m6Acluster.B	-0.194655	0.202259	0.236355	0.281388	0.192692	0.220606	-0.0450358	0.264413	-0.203031	0.346762	0.0534606	0.0829576	0.343582	0.314762	0.186127	0.0752403	-0.168015	0.306264	0.194492	0.145149	0.105818	-0.105866	0.108415
GSM387930	m6Acluster.B	-0.0435718	0.429208	0.422326	0.318224	0.245817	0.288769	-0.0800519	0.318776	-0.128878	0.335335	0.0459075	0.00942229	0.366589	0.337155	0.147225	0.036928	-0.0804568	0.264421	0.171815	0.141563	0.121712	-0.00370349	0.229509
GSM387931	m6Acluster.B	-0.00839756	0.233956	0.262066	0.30694	0.221488	0.237174	0.0415676	0.356754	-0.0866112	0.35346	0.107981	0.201785	0.399917	0.389219	0.179647	0.0872592	-0.15865	0.39017	0.234424	0.172484	0.158687	-0.159904	0.167541
GSM387932	m6Acluster.B	-0.0935764	0.321362	0.212581	0.23023	0.241669	0.269115	-0.0700879	0.262144	-0.251244	0.34908	-0.0859585	-0.0703785	0.196922	0.298937	0.0818453	-0.0248399	-0.300154	0.233404	0.0383968	0.0341368	0.0439398	-0.0734578	0.105449
GSM387933	m6Acluster.A	-0.0753691	0.262093	0.342384	0.268731	0.239431	0.243968	-0.0297381	0.343263	-0.164109	0.356343	0.0527303	0.0541773	0.340397	0.326157	0.135257	0.0155555	-0.160412	0.264155	0.179523	0.146681	0.120926	-0.0703137	0.166576
GSM387934	m6Acluster.A	0.0433408	0.349268	0.42205	0.366724	0.244295	0.290798	0.0217102	0.366626	-0.031726	0.382372	0.112423	0.0380304	0.434039	0.381065	0.168168	0.0435167	0.0619068	0.299905	0.221699	0.181524	0.141017	0.0044928	0.183788
GSM387935	m6Acluster.C	-0.065685	0.25906	0.301072	0.263818	0.208303	0.321567	0.0677425	0.261929	-0.155923	0.352821	0.0112054	0.0592136	0.310369	0.342304	0.142738	0.0283004	-0.147258	0.307605	0.0665103	0.104384	0.0908036	-0.0526691	0.144897
GSM387936	m6Acluster.A	-0.186827	0.1621	0.301	0.302732	0.243816	0.255908	0.0344382	0.347181	-0.161481	0.346625	0.0925418	0.250725	0.341653	0.339509	0.181293	0.119155	-0.144249	0.390693	0.194063	0.190003	0.153185	-0.146906	0.145526
GSM387937	m6Acluster.B	-0.267832	0.132838	0.270022	0.222187	0.253096	0.231532	-0.048645	0.237732	-0.211449	0.381421	0.00311497	0.089332	0.273119	0.297196	0.188344	0.00133334	-0.305346	0.32566	0.0900215	0.139597	0.0816169	-0.142096	0.126646
GSM387938	m6Acluster.A	-0.236377	0.206915	0.303969	0.270265	0.26014	0.259862	-0.0681403	0.266195	-0.261136	0.341536	-0.0334366	-0.0182142	0.263294	0.34065	0.126694	0.00990991	-0.205707	0.272784	0.0499668	0.0844014	0.0742348	-0.0366132	0.103261
GSM387939	m6Acluster.C	0.115265	0.286009	0.302865	0.248377	0.250703	0.285403	0.0214196	0.259348	-0.0612981	0.334795	-0.0487012	-0.0350571	0.269957	0.348086	0.122764	-0.00267046	-0.234363	0.275427	0.0517957	0.107952	0.092958	-0.0536849	0.135831
GSM387940	m6Acluster.A	-0.0213587	0.263876	0.368798	0.30884	0.229145	0.278756	0.0279431	0.276579	-0.126963	0.351097	0.0989155	0.117484	0.405514	0.349354	0.187785	0.0526864	-0.262857	0.301205	0.171518	0.173706	0.160319	-0.0796422	0.145388
GSM387941	m6Acluster.C	-0.197023	0.360967	0.307122	0.340775	0.244101	0.308774	-0.128086	0.383009	-0.159222	0.381091	0.143816	0.0706256	0.384715	0.335078	0.153616	0.10472	-0.0431585	0.332225	0.289278	0.168341	0.106691	-0.0474342	0.110628
GSM387942	m6Acluster.C	-0.354409	0.247875	0.205723	0.221537	0.176031	0.208226	-0.131003	0.248933	-0.257265	0.323275	-0.0385061	-0.0480155	0.179956	0.296712	0.137801	0.0124677	-0.28829	0.255386	0.0470022	0.0803253	0.0845279	-0.0796866	0.1826
GSM387943	m6Acluster.B	-0.123597	0.222015	0.266798	0.255962	0.188992	0.190977	-0.0744803	0.263105	-0.15001	0.311581	-0.0113728	0.0615135	0.26816	0.308743	0.131454	0.0328266	-0.327384	0.292142	0.0782468	0.087062	0.0728854	-0.121619	0.161314
GSM387944	m6Acluster.A	0.0950106	0.254472	0.305988	0.298299	0.197452	0.245767	-0.110235	0.245563	-0.167907	0.328619	-0.0111259	-0.00733684	0.230928	0.434708	0.159616	0.0407916	-0.162047	0.268391	0.0242514	0.119038	0.0991708	-0.0166132	0.0340098
GSM387945	m6Acluster.C	-0.262036	0.303528	0.240241	0.275755	0.209125	0.251801	-0.124572	0.339945	-0.19508	0.359695	0.0535245	0.0468954	0.270202	0.322445	0.160121	0.0580824	-0.0688139	0.310192	0.190596	0.161789	0.0867643	-0.109449	0.155446
GSM387946	m6Acluster.A	0.320683	0.392977	0.452236	0.322772	0.230237	0.277611	-0.0251254	0.289917	0.0598895	0.345128	0.0428855	0.0412941	0.435342	0.404033	0.177635	0.0651458	-0.198206	0.33259	0.216719	0.18469	0.168505	-0.0689573	0.155332
GSM387947	m6Acluster.B	0.0113036	0.38822	0.395633	0.332467	0.255282	0.266684	0.0412922	0.308371	-0.0507915	0.348678	0.0806861	0.193858	0.388518	0.348446	0.18594	0.091616	-0.182515	0.333344	0.180353	0.185603	0.154027	-0.112121	0.16873
GSM387948	m6Acluster.A	-0.0400861	0.314486	0.3791	0.296305	0.245043	0.286226	-0.0348211	0.325533	-0.158078	0.325016	-0.0130506	0.0600236	0.327414	0.320512	0.146998	0.040829	-0.203877	0.270522	0.0953521	0.101005	0.102198	-0.0120149	0.198298
GSM387949	m6Acluster.C	-0.193584	0.26743	0.264478	0.251489	0.248425	0.262939	-0.0308375	0.304674	-0.227716	0.318707	-0.016972	-0.0212093	0.210811	0.31701	0.0838745	-0.000754871	-0.0600864	0.259771	0.0637881	0.0898257	0.0414443	-0.0718603	0.110937
GSM387950	m6Acluster.B	0.219767	0.346657	0.474601	0.304152	0.209244	0.21747	0.000406891	0.266783	0.104387	0.313633	0.0261518	-0.0340068	0.379924	0.360287	0.190313	0.0422347	-0.324704	0.31175	0.214626	0.159851	0.159184	-0.102089	0.194576
GSM387951	m6Acluster.A	-0.157791	0.217573	0.269889	0.259434	0.221775	0.26228	-0.185856	0.304167	-0.169939	0.28049	-0.0587105	-0.120773	0.138789	0.325205	0.115047	-0.0221949	-0.100752	0.285124	-0.0308287	0.0623383	0.0845033	-0.0364275	0.133798
GSM387952	m6Acluster.B	-0.244285	0.314937	0.361647	0.299685	0.200282	0.269536	-0.235665	0.261679	-0.191514	0.268167	-0.00755869	-0.0245196	0.181728	0.329441	0.140113	0.0488624	-0.210917	0.213869	0.0666597	0.0647711	0.0795423	-0.0448284	0.134606
GSM387953	m6Acluster.B	0.0162252	0.353443	0.446647	0.36483	0.239031	0.267296	-0.0796808	0.303311	0.0238572	0.389616	0.115104	0.058452	0.45351	0.386482	0.19615	0.0601374	-0.190395	0.331358	0.24073	0.174539	0.165775	-0.0583864	0.190582
GSM387954	m6Acluster.C	-0.254375	0.259689	0.294744	0.293105	0.249652	0.260485	-0.131142	0.308337	-0.188597	0.351354	0.0826201	0.0511188	0.310043	0.322714	0.172422	0.0550708	-0.274309	0.298912	0.153632	0.143927	0.103429	-0.0426023	0.143212
GSM387955	m6Acluster.C	-0.288418	0.235148	0.218581	0.257418	0.203362	0.261254	-0.148365	0.278757	-0.260455	0.327306	-0.0182846	-0.0114067	0.188213	0.331187	0.15898	0.0243823	-0.207765	0.292772	0.0962848	0.104301	0.0799159	-0.0682374	0.197958
GSM387956	m6Acluster.A	-0.198386	0.220643	0.145946	0.293509	0.246502	0.2784	-0.0294824	0.265019	-0.206553	0.370578	0.0307722	-0.0374831	0.284078	0.358842	0.145631	0.0315156	-0.229679	0.341609	0.0885968	0.13713	0.06916	-0.0821545	0.0964357
GSM387957	m6Acluster.A	-0.193671	0.142701	0.249925	0.313582	0.170893	0.250154	-0.205321	0.224207	-0.266325	0.35265	0.030625	0.113396	0.261485	0.421313	0.165401	0.0371646	-0.191097	0.302476	0.156298	0.128051	0.0876481	-0.0289172	0.0721001
GSM387958	m6Acluster.C	-0.335382	0.158375	0.113679	0.205165	0.237577	0.226107	-0.163947	0.274156	-0.343781	0.255268	-0.123868	-0.173281	-0.0240057	0.33399	0.0843355	-0.118901	-0.230107	0.232015	-0.0138177	0.0240192	-0.0569958	-0.176871	0.107139
GSM387959	m6Acluster.B	-0.0694118	0.492935	0.518016	0.330705	0.226605	0.261054	-0.041138	0.376039	-0.0194764	0.354078	0.150698	0.0951345	0.511929	0.355906	0.235986	0.115737	-0.250682	0.327649	0.322491	0.233034	0.18302	-0.0751455	0.198852
GSM387960	m6Acluster.A	-0.271768	-0.0357436	0.121137	0.191948	0.197038	0.215199	-0.0142049	0.271785	-0.244164	0.350584	0.0326709	0.164794	0.157531	0.317038	0.16602	0.0426659	-0.277548	0.318698	0.0999309	0.107027	0.0966652	-0.186739	0.121993
GSM387961	m6Acluster.A	0.0682619	0.307678	0.407502	0.294619	0.224653	0.253738	-0.100056	0.297262	-0.107973	0.345508	0.0311304	0.105898	0.350185	0.40538	0.187874	0.0784439	-0.200374	0.325086	0.150568	0.160548	0.147379	-0.0519375	0.116578
GSM387962	m6Acluster.A	-0.0503349	0.274147	0.343009	0.299909	0.250653	0.277322	-0.0847755	0.293174	-0.123701	0.362927	0.0581807	0.0656498	0.323996	0.338831	0.189349	0.0511615	-0.239459	0.311141	0.161247	0.16109	0.137967	-0.0315052	0.173004
GSM387963	m6Acluster.B	-0.0241856	0.395496	0.394537	0.32533	0.239191	0.258874	-0.0877394	0.307415	-0.0872495	0.343089	0.0488239	0.00660817	0.353006	0.349196	0.184547	0.0622392	-0.216939	0.286283	0.179537	0.158695	0.126596	-0.0463271	0.211793
GSM387964	m6Acluster.C	-0.162839	0.358428	0.367296	0.289085	0.193603	0.283582	-0.16363	0.325594	-0.126074	0.35347	-0.00403619	-0.064593	0.268957	0.324805	0.146001	0.0501871	-0.225082	0.290753	0.217291	0.113383	0.119019	-0.0502176	0.136479
GSM387965	m6Acluster.C	-0.177976	0.299074	0.258235	0.329354	0.27595	0.275952	-0.0789741	0.302703	-0.160185	0.381145	0.0529361	0.0514703	0.364844	0.351871	0.180949	0.0171028	-0.243029	0.317952	0.188265	0.160621	0.128866	0.00091115	0.14134
GSM387966	m6Acluster.B	-0.320334	0.211892	0.138445	0.231292	0.194431	0.219586	-0.0998836	0.230583	-0.322446	0.264501	-0.124648	-0.031913	0.0863319	0.325248	0.0432657	-0.0313218	-0.276783	0.206067	-0.0404214	0.0352545	0.0114877	-0.0476394	0.112262
GSM387967	m6Acluster.A	0.0908671	0.291039	0.341078	0.274881	0.222188	0.270659	-0.00940346	0.315498	-0.0280017	0.379659	0.0287982	0.060808	0.390108	0.338561	0.158774	0.0643627	-0.18626	0.380396	0.164442	0.110037	0.141515	-0.103101	0.151599
GSM387968	m6Acluster.C	-0.214278	0.2227	0.222934	0.295474	0.231926	0.293145	-0.0878661	0.33285	-0.25795	0.326494	-0.00368336	-0.0774493	0.246333	0.32643	0.159084	0.0358513	-0.149306	0.276296	0.0977523	0.102057	0.0658192	-0.00346929	0.0780497
GSM387969	m6Acluster.B	0.476579	0.506453	0.5518	0.363589	0.256426	0.26998	0.0681407	0.333842	0.329748	0.352072	0.12204	0.0235436	0.545789	0.426379	0.217746	0.0886857	-0.282096	0.349231	0.296521	0.261029	0.226137	-0.0523276	0.139311
GSM387970	m6Acluster.A	-0.35232	0.241906	0.108895	0.34328	0.202922	0.302072	-0.195033	0.358465	-0.167149	0.407572	0.143823	0.0977579	0.342579	0.338792	0.186188	0.0653105	0.158273	0.388598	0.194072	0.157299	0.107016	-0.0803415	0.110476
GSM387971	m6Acluster.C	-0.276644	0.220734	0.257616	0.339591	0.210713	0.279915	-0.156563	0.301504	-0.205924	0.333139	0.040404	-0.043086	0.288367	0.349621	0.140766	0.0251554	-0.1575	0.337968	0.181391	0.171777	0.0858326	-0.0198176	0.168951
GSM387972	m6Acluster.A	-0.012057	0.137595	0.222318	0.328187	0.213045	0.292107	-0.152246	0.254731	-0.19862	0.360294	0.0498818	0.0276487	0.29816	0.439852	0.209248	0.0921709	-0.0640826	0.295935	0.127353	0.176833	0.0937533	-0.0352364	-0.0151832
GSM387973	m6Acluster.C	-0.243719	0.305181	0.304033	0.278933	0.228966	0.270595	-0.0502697	0.284681	-0.199766	0.320683	0.0312482	0.0746398	0.291255	0.339847	0.141966	0.0452813	-0.225184	0.278285	0.131656	0.101788	0.105219	-0.0255629	0.198522
GSM387974	m6Acluster.A	0.0850215	0.326446	0.46794	0.385385	0.225317	0.294943	-0.121652	0.283641	-0.124303	0.324029	0.0920292	0.0266036	0.37974	0.495245	0.215647	0.132033	-0.0403719	0.314837	0.247781	0.234431	0.176658	0.0159973	0.0302364
GSM387975	m6Acluster.C	-0.209397	0.313345	0.369002	0.308539	0.229393	0.256318	-0.232564	0.303156	-0.167297	0.324988	0.015001	0.000578959	0.308682	0.335233	0.195262	0.0861092	-0.177764	0.288982	0.184211	0.165664	0.0978491	-0.0384414	0.105954
GSM387976	m6Acluster.C	-0.273803	0.283518	0.312564	0.237144	0.255523	0.238578	-0.162093	0.312264	-0.214344	0.310237	0.0092065	-0.00552902	0.279852	0.328301	0.158468	0.000485727	-0.208467	0.283351	0.123888	0.150927	0.0684078	-0.097774	0.143932
GSM387977	m6Acluster.C	0.106417	0.332126	0.356936	0.291959	0.224956	0.266239	-0.00878146	0.332509	0.0164684	0.33302	0.0225423	0.0149482	0.319153	0.350844	0.136389	0.027955	-0.0782373	0.27967	0.139935	0.149947	0.126666	-0.0752588	0.190722
GSM387978	m6Acluster.B	-0.225819	0.129103	0.303401	0.245094	0.181799	0.189568	-0.122005	0.223215	-0.161015	0.35922	0.00434801	0.0639242	0.287806	0.306291	0.174551	0.0364799	-0.322461	0.300466	0.110328	0.114709	0.0968964	-0.106111	0.140518
GSM387979	m6Acluster.A	-0.19611	0.155575	0.260117	0.229749	0.221313	0.257448	-0.108601	0.253242	-0.247726	0.32108	-0.032755	-0.0695591	0.189774	0.329676	0.155932	0.0432841	-0.221345	0.297579	0.0165173	0.101637	0.0763137	-0.0761077	0.138785
GSM387980	m6Acluster.B	-0.323531	0.220181	0.211324	0.257195	0.204149	0.223871	-0.175423	0.254132	-0.206905	0.348826	-0.046407	-0.0324476	0.174237	0.288289	0.147517	0.050488	-0.280223	0.261098	0.0730745	0.077793	0.0777498	-0.0407663	0.20166
GSM387981	m6Acluster.C	-0.373797	0.245785	0.169555	0.257442	0.228801	0.257114	-0.142412	0.310185	-0.266137	0.368842	-0.00238234	0.0405718	0.184357	0.305192	0.119212	0.0326735	-0.208526	0.302819	0.112551	0.13315	0.0643095	-0.0612828	0.193682
GSM387982	m6Acluster.A	0.0118846	0.201802	0.356949	0.256151	0.230107	0.253967	0.00344245	0.222053	-0.107464	0.322515	-0.0664217	-0.0771867	0.267903	0.355064	0.112626	-0.0186227	-0.317168	0.302573	0.0631971	0.0792927	0.0987908	-0.0757489	0.14227
GSM387983	m6Acluster.A	-0.182433	0.212912	0.322683	0.283524	0.189049	0.291526	-0.0534685	0.279694	-0.239719	0.343941	0.0491836	0.114292	0.337399	0.336718	0.193277	0.0681084	-0.201251	0.304259	0.129294	0.142193	0.115792	-0.0527181	0.0973996
GSM387984	m6Acluster.C	-0.307919	0.275876	0.272713	0.291287	0.180117	0.273823	-0.188877	0.265704	-0.316329	0.296585	-0.0992133	-0.0140509	0.211695	0.338458	0.136612	0.0577987	-0.168169	0.231478	0.0174175	0.0386867	0.0664464	-0.0237806	0.0120505
GSM387985	m6Acluster.C	-0.29621	0.184862	0.197147	0.288441	0.224269	0.300256	-0.157473	0.277599	-0.279771	0.322836	-0.0284142	0.0149814	0.256678	0.351481	0.0906498	0.0406024	-0.142566	0.272869	0.0620902	0.0763684	0.0729105	-0.0646164	0.127414
GSM387986	m6Acluster.C	-0.216397	0.243353	0.136986	0.212237	0.195741	0.302069	-0.0604149	0.24854	-0.292396	0.296261	-0.0770463	-0.104797	0.176118	0.369722	0.0752027	-0.0429206	-0.201772	0.241487	0.0161492	0.0965929	0.00976014	-0.117241	0.089338
GSM387987	m6Acluster.C	-0.312248	0.175386	0.142199	0.240076	0.181868	0.280175	-0.251824	0.302055	-0.298479	0.341091	-0.0181083	-0.138219	0.138919	0.345134	0.107065	-0.0226852	-0.258239	0.259049	0.0194059	0.106438	0.00201986	-0.141901	0.020753
GSM858082	m6Acluster.A	0.0460543	0.432348	0.48464	0.344823	0.255006	0.289521	-0.00760461	0.34073	-0.0121461	0.355679	0.067813	0.0932538	0.448878	0.357466	0.214194	0.0810542	-0.263214	0.289548	0.242785	0.194141	0.154154	-0.0390312	0.18271
GSM858083	m6Acluster.B	-0.236141	0.426696	0.380763	0.402731	0.219729	0.270156	-0.131786	0.319688	-0.124582	0.329181	0.0398247	0.0285961	0.334495	0.347929	0.160775	0.0772791	-0.0979181	0.283353	0.182424	0.11604	0.117406	0.00679796	0.144016
GSM858084	m6Acluster.A	-0.146208	0.282865	0.246518	0.298386	0.275559	0.250565	0.015044	0.361807	-0.179886	0.378493	0.0807475	0.0816997	0.317022	0.350716	0.14308	0.0582654	-0.132198	0.286806	0.154484	0.133813	0.116443	-0.0464948	0.217778
GSM858085	m6Acluster.C	-0.214228	0.322258	0.333352	0.282965	0.256562	0.266317	-0.0827365	0.288198	-0.223386	0.275403	0.00674198	-0.0571815	0.288699	0.298369	0.136296	0.0666091	-0.277583	0.298313	0.139168	0.117849	0.0752289	-0.103869	0.137723
GSM858086	m6Acluster.C	-0.284886	0.210189	0.161708	0.273946	0.200129	0.295647	-0.239091	0.333596	-0.251068	0.329304	0.00537705	0.0075635	0.228687	0.327727	0.167016	0.0533024	-0.263673	0.248528	0.129503	0.106539	0.0811059	-0.0603159	0.074269
GSM858087	m6Acluster.C	-0.121557	0.253609	0.316553	0.309567	0.234367	0.275198	-0.00390491	0.296475	-0.165877	0.384512	0.0526248	0.110823	0.348139	0.325637	0.181556	0.0509653	-0.226325	0.325621	0.170478	0.191446	0.148246	-0.0541299	0.135796
GSM858088	m6Acluster.A	-0.00307435	0.36971	0.388784	0.318777	0.248024	0.276787	-0.0257988	0.325796	-0.0496682	0.377131	0.0399506	9.67e-05	0.329808	0.333381	0.176283	0.0388163	-0.195377	0.318993	0.196326	0.16485	0.136573	-0.0356253	0.188426
GSM858089	m6Acluster.A	-0.268763	0.0137702	0.220756	0.234077	0.178758	0.206319	-0.0663019	0.272902	-0.221036	0.328337	0.0532091	0.217922	0.292125	0.328946	0.182752	0.044692	-0.272768	0.326052	0.165971	0.102173	0.115191	-0.176362	0.146145
GSM858090	m6Acluster.A	-0.185363	0.0738744	0.242679	0.223228	0.152587	0.181274	-0.0720067	0.220382	-0.171748	0.334598	-0.0233478	0.100481	0.254568	0.319793	0.162179	0.0083428	-0.290131	0.313216	0.133731	0.0846241	0.0861045	-0.184801	0.14072
GSM858091	m6Acluster.A	0.0367561	0.222948	0.364485	0.345052	0.196068	0.215066	0.0425362	0.313323	-0.0665468	0.388021	0.13066	0.266891	0.471399	0.35566	0.222299	0.0891465	0.086231	0.366547	0.234366	0.167542	0.184778	-0.148209	0.142787
GSM858092	m6Acluster.C	-0.259213	0.306165	0.249602	0.277179	0.234207	0.26902	-0.122621	0.306647	-0.253662	0.380123	0.000678002	-0.00170936	0.269975	0.325251	0.12579	0.0219482	-0.159342	0.274255	0.128283	0.111716	0.092432	-0.113856	0.157096
GSM858093	m6Acluster.B	0.0740443	0.422561	0.421711	0.317418	0.227511	0.272993	-0.0917031	0.254975	-0.0401161	0.322629	-0.0191885	-0.0273071	0.332554	0.335865	0.132482	0.0167435	-0.170249	0.288862	0.0997135	0.105187	0.108431	-0.0748199	0.162556
GSM858094	m6Acluster.C	-0.0643978	0.329719	0.403837	0.294885	0.213213	0.251172	-0.166415	0.303812	-0.115592	0.319502	0.0505177	0.0279169	0.331222	0.338169	0.180789	0.0438214	-0.298598	0.279512	0.169563	0.158888	0.101019	-0.0606734	0.135906
GSM858095	m6Acluster.C	-0.325296	0.284272	0.269547	0.293965	0.208452	0.269208	-0.0441266	0.303327	-0.253455	0.309596	-0.0552566	-0.0312176	0.214869	0.391108	0.0966678	0.014038	-0.150328	0.270369	0.0915976	0.070802	0.0520082	-0.110923	0.134779
GSM858096	m6Acluster.A	0.166647	0.229013	0.396459	0.305401	0.247817	0.246829	0.021594	0.348296	0.0316819	0.364307	0.190482	0.256286	0.488665	0.370398	0.1987	0.112691	-0.184173	0.376462	0.26295	0.199456	0.18259	-0.184358	0.106303
GSM858097	m6Acluster.C	-0.243679	0.281004	0.310452	0.278009	0.230961	0.285009	-0.139371	0.360875	-0.152143	0.402354	0.0433127	-0.089685	0.327307	0.387554	0.172427	0.027167	-0.0868013	0.309235	0.225656	0.170051	0.076686	-0.0895535	0.103536
GSM858098	m6Acluster.C	-0.382948	0.17815	0.117439	0.225831	0.184946	0.266493	-0.228049	0.285891	-0.299129	0.338535	-0.0418003	-0.0882729	0.139834	0.297195	0.0878093	0.00136449	-0.252625	0.276675	0.0454623	0.125243	0.0115807	-0.16237	0.0813334
GSM858099	m6Acluster.C	-0.324716	0.301137	0.292795	0.273137	0.267945	0.271732	-0.150971	0.298141	-0.26185	0.310191	-0.0242171	-0.0839191	0.273278	0.4178	0.140648	-0.00178857	-0.227479	0.295498	0.107525	0.11507	0.0156572	-0.11714	0.119306
GSM858100	m6Acluster.A	-0.266364	0.208069	0.221576	0.225822	0.253754	0.265195	-0.0251862	0.280583	-0.204094	0.343194	0.0585406	0.131747	0.326053	0.337175	0.179642	0.0531224	-0.267125	0.331607	0.173269	0.168495	0.139678	-0.0500738	0.225701
GSM858101	m6Acluster.C	-0.304132	0.298061	0.273661	0.293678	0.253063	0.266716	-0.140485	0.310036	-0.248428	0.303879	-0.0135661	0.0386668	0.229823	0.301816	0.150173	0.0495478	-0.24372	0.27807	0.132108	0.124855	0.0772849	-0.0352175	0.187632
GSM858102	m6Acluster.B	-0.309481	0.292259	0.243145	0.336525	0.202916	0.239383	-0.22489	0.315788	-0.147884	0.389243	0.0195186	-0.0624441	0.300553	0.343454	0.148591	0.0582626	-0.0800921	0.290598	0.185321	0.105556	0.0871247	-0.0824536	0.0727505
GSM858103	m6Acluster.C	-0.294663	0.173235	0.153496	0.316914	0.207601	0.255737	-0.158815	0.302536	-0.253814	0.394503	-0.0204758	-0.140648	0.198214	0.441599	0.135776	0.00338612	-0.169293	0.319708	0.125777	0.136947	0.0408579	-0.0688135	0.0554978
GSM858104	m6Acluster.A	-0.257723	0.000518734	0.207474	0.200527	0.176518	0.255448	-0.0526994	0.17979	-0.256199	0.310858	0.0193299	0.0210506	0.227862	0.32286	0.16521	0.040334	-0.362567	0.370258	0.119569	0.133549	0.0938775	-0.074972	0.0544375
GSM858105	m6Acluster.B	-0.0256905	0.453259	0.510763	0.302723	0.262231	0.270351	-0.0436441	0.320997	-0.0491849	0.347013	0.0696996	-0.019345	0.442841	0.359756	0.200443	0.0622453	-0.223547	0.30256	0.239129	0.196043	0.150837	-0.0118769	0.226063
GSM858106	m6Acluster.B	-0.119944	0.35163	0.355311	0.305211	0.200475	0.22548	-0.0247893	0.316215	-0.136383	0.355826	0.048472	0.150366	0.351626	0.304499	0.181443	0.0654828	-0.21236	0.316974	0.21235	0.159135	0.126025	-0.0789642	0.224968
GSM858107	m6Acluster.B	0.173663	0.419589	0.416912	0.366825	0.270763	0.245585	-0.0103384	0.350482	0.0743019	0.395464	0.151474	0.18151	0.489806	0.384977	0.197977	0.0929854	0.0342423	0.366716	0.255966	0.202814	0.203806	-0.0248226	0.215265
GSM858108	m6Acluster.B	-0.33206	0.227853	0.146355	0.223601	0.215294	0.244024	-0.237258	0.22028	-0.337418	0.245692	-0.0985154	-0.0637771	0.0638975	0.315602	0.055998	0.0257718	-0.211895	0.266069	0.00132594	0.0352676	0.0515967	-0.0619079	0.169006
GSM858109	m6Acluster.B	-0.321212	0.316396	0.255167	0.329309	0.188377	0.260959	-0.191049	0.334098	-0.215853	0.342207	0.028635	0.0203756	0.229448	0.347223	0.13514	0.0352194	-0.0666617	0.267078	0.174018	0.100962	0.0901138	-0.0236922	0.14533
GSM858110	m6Acluster.A	-0.00331575	0.129417	0.316899	0.243212	0.227124	0.243693	0.0352875	0.181414	-0.179612	0.29661	-0.0791037	-0.0140467	0.194472	0.331048	0.125689	-0.0167903	-0.349691	0.298141	0.0278937	0.079139	0.102495	-0.0814708	0.0456676
GSM858111	m6Acluster.A	0.090686	0.416865	0.41782	0.324552	0.258935	0.278138	-0.0761874	0.358795	0.0251537	0.392903	0.0996207	0.10881	0.473448	0.372513	0.191576	0.087383	-0.263031	0.324506	0.26888	0.205385	0.171185	-0.0689128	0.173106
GSM858112	m6Acluster.C	-0.24584	0.244675	0.245342	0.290981	0.243898	0.260136	-0.289703	0.308658	-0.187678	0.286609	-0.0078309	-0.14486	0.182664	0.32078	0.137465	0.0136728	-0.221273	0.308606	0.0604073	0.0783686	0.0765935	-0.0734519	0.109459
GSM858113	m6Acluster.B	0.0492607	0.286323	0.318637	0.251069	0.244729	0.231269	0.0516587	0.27841	-0.0779584	0.350851	-0.0214829	-0.0194397	0.287659	0.342127	0.10389	-0.0280998	-0.203466	0.283572	0.0267383	0.109049	0.0799852	-0.0787834	0.160088
GSM858114	m6Acluster.A	0.239351	0.260833	0.357742	0.276912	0.227965	0.228166	0.049157	0.283282	0.0805769	0.343139	0.031736	0.173513	0.386577	0.355561	0.174198	0.0439387	-0.194654	0.353523	0.214459	0.156963	0.145959	-0.105758	0.165899
GSM858115	m6Acluster.B	-0.00240973	0.323817	0.315181	0.282749	0.209085	0.27356	-0.103967	0.273106	-0.125851	0.360575	0.05109	0.00122948	0.271326	0.322801	0.126055	-0.00426264	-0.198	0.249253	0.107198	0.107861	0.0754783	-0.0598456	0.117145
GSM858116	m6Acluster.C	-0.258643	0.260139	0.174551	0.208686	0.226121	0.248593	-0.142302	0.21446	-0.269552	0.337703	-0.0671685	-0.0139189	0.164802	0.364597	0.109656	-0.033444	-0.287829	0.251068	-0.013096	0.0684586	0.0306971	-0.0631114	0.154663
GSM858117	m6Acluster.C	-0.0972701	0.32007	0.343916	0.245177	0.220471	0.269698	-0.00622131	0.285504	-0.109377	0.348716	0.0655667	0.016436	0.295922	0.322219	0.17991	0.0414923	-0.278194	0.290468	0.0845768	0.154343	0.125616	-0.0552786	0.206951
GSM858118	m6Acluster.B	-0.0706676	0.28561	0.332407	0.305261	0.232039	0.243447	0.0447775	0.334216	-0.134701	0.352118	0.0986502	0.206463	0.36183	0.340805	0.186354	0.0863069	-0.0819895	0.327649	0.225033	0.175718	0.146176	-0.0834076	0.143426
GSM858119	m6Acluster.A	-0.301717	-0.0966566	0.0694342	0.147357	0.167456	0.194092	-0.0143201	0.212164	-0.24487	0.321542	-0.029933	0.150409	0.0998871	0.287663	0.147305	0.00415238	-0.266541	0.318037	0.0131019	0.043693	0.0455674	-0.181626	0.136322
GSM858120	m6Acluster.C	-0.237919	0.272871	0.187069	0.250072	0.216963	0.270673	-0.277384	0.279478	-0.246393	0.302963	0.0182524	-0.121673	0.206575	0.299577	0.106367	0.0221154	-0.226713	0.304242	0.0831474	0.108607	0.0870569	-0.0805063	0.153384
GSM858121	m6Acluster.A	-0.307497	0.176968	0.209781	0.282315	0.230357	0.259812	0.0305862	0.292263	-0.237841	0.362913	0.0960987	0.0744932	0.315766	0.306166	0.177042	0.0974702	-0.275924	0.346048	0.176002	0.14154	0.0946206	-0.0500348	0.126795
GSM858122	m6Acluster.B	-0.142671	0.197447	0.261035	0.256154	0.231473	0.271719	0.062604	0.279088	-0.175576	0.319272	-0.0314683	0.01206	0.222362	0.356387	0.102598	-0.0266798	-0.0672831	0.231075	-0.00302504	0.0892835	0.0974822	-0.0150035	0.12788
GSM858123	m6Acluster.A	-0.133351	0.249635	0.232733	0.268507	0.213389	0.254912	-0.0918094	0.271308	-0.222605	0.345656	0.0146312	0.0335694	0.216103	0.312675	0.146552	0.0390314	-0.285048	0.270607	0.0657553	0.105792	0.0782335	-0.0788805	0.113918
GSM858124	m6Acluster.C	-0.357798	0.185034	0.135839	0.28152	0.203876	0.285767	-0.143468	0.278606	-0.284458	0.328393	0.0557321	-0.0140723	0.252732	0.346536	0.1375	0.0567329	-0.120265	0.322701	0.110638	0.109889	0.046811	-0.0746067	0.062107
GSM858125	m6Acluster.A	0.271185	0.317588	0.42553	0.280941	0.261206	0.255973	0.107292	0.288986	0.0589457	0.3194	-0.0019073	0.0911935	0.398299	0.36378	0.162482	0.00497752	-0.176516	0.297575	0.135549	0.160015	0.145732	-0.0568249	0.148532
GSM858126	m6Acluster.A	-0.154345	0.153699	0.290586	0.267644	0.232043	0.271181	-0.0534301	0.278757	-0.221395	0.310647	-0.0410805	-0.0762311	0.265741	0.362974	0.102147	-0.00746056	-0.107711	0.223763	0.0787078	0.0983413	0.0637917	-0.0193527	0.0913308
GSM858127	m6Acluster.B	0.12127	0.326178	0.363723	0.270651	0.202375	0.26015	0.0145592	0.2738	-0.041219	0.339211	-0.0222185	0.0534583	0.310466	0.341383	0.146501	0.0149299	-0.216244	0.292945	0.121732	0.148909	0.109113	-0.048264	0.145162
GSM858128	m6Acluster.B	-0.185387	0.312004	0.269901	0.306423	0.246604	0.23481	-0.0786286	0.290523	-0.208268	0.378182	0.0365493	0.0587856	0.281554	0.329053	0.110706	0.0281565	-0.194875	0.236152	0.134655	0.0952927	0.0688511	-0.0613346	0.155064
GSM858129	m6Acluster.B	-0.261125	0.287375	0.267532	0.28958	0.221349	0.251693	-0.141678	0.315481	-0.21102	0.3206	-0.0116785	0.0759574	0.324107	0.328463	0.108502	0.0606377	-0.0509445	0.297782	0.177068	0.118499	0.0968515	-0.0726074	0.202642
GSM858130	m6Acluster.B	-0.305118	0.0731833	0.214452	0.188721	0.127258	0.185647	-0.0568044	0.220836	-0.245774	0.361611	-0.0250499	0.143889	0.237369	0.309975	0.135588	0.0372367	-0.250573	0.316363	0.0798134	0.0970906	0.08409	-0.126651	0.108051
GSM858131	m6Acluster.C	0.0920715	0.375316	0.4452	0.291972	0.210165	0.263976	-0.106843	0.318321	-0.0242724	0.292672	0.0320287	0.0424777	0.381333	0.339343	0.180585	0.0681495	-0.310894	0.315044	0.178391	0.186234	0.132776	-0.134473	0.144348
GSM858132	m6Acluster.A	0.0613135	0.27758	0.429312	0.300023	0.230226	0.258434	-0.0170505	0.315862	-0.0968909	0.318746	-0.000267549	-0.0746146	0.341373	0.35852	0.142778	-0.0138143	-0.159067	0.272432	0.140541	0.118122	0.108352	-0.0474349	0.120469
GSM858133	m6Acluster.C	-0.393905	0.119765	0.120933	0.176809	0.200792	0.292369	-0.306609	0.273362	-0.315499	0.339711	-0.0810868	-0.0978443	0.0694109	0.323411	0.154684	0.019949	-0.312235	0.225019	-0.111185	0.0735694	0.0316449	-0.0802572	0.0575446
GSM858134	m6Acluster.B	0.0983627	0.467312	0.533652	0.394611	0.294322	0.303087	0.0360015	0.383775	0.0846167	0.409044	0.210651	0.090206	0.567048	0.401827	0.259723	0.138104	-0.0768398	0.335758	0.345958	0.259131	0.229527	0.0217207	0.200243
GSM858135	m6Acluster.A	-0.135694	0.316882	0.365793	0.357541	0.243494	0.263267	-0.00290603	0.324442	-0.140159	0.362418	0.135029	0.195149	0.411903	0.340455	0.221313	0.138832	-0.118049	0.333598	0.260559	0.184189	0.195231	-0.008092	0.193701
GSM858136	m6Acluster.A	-0.0815824	0.290176	0.43826	0.273122	0.239138	0.272723	0.003682	0.304492	-0.12519	0.33569	0.130607	0.156034	0.361862	0.346058	0.189815	0.0748806	-0.289043	0.345275	0.21435	0.205756	0.175762	-0.0386096	0.187547
GSM858137	m6Acluster.A	-0.310797	0.235748	0.144632	0.283212	0.225272	0.275025	-0.190807	0.327684	-0.245765	0.32802	0.0202561	0.0819562	0.219085	0.31609	0.174668	0.086638	-0.250143	0.261612	0.132219	0.09853	0.0805396	-0.0647578	0.159846

## Sheet: S5
Table-S5: The activation states of biological pathways in distinct m6A modification patterns by GSVA enrichment analysis
Pathway	m6Acluster.B	m6Acluster.C	P value
KEGG_ALLOGRAFT_REJECTION	0.0708247	-0.171083	8.14429e-14
KEGG_ANTIGEN_PROCESSING_AND_PRESENTATION	0.0721263	-0.110017	2.38991e-13
KEGG_APOPTOSIS	0.0783827	-0.0757166	2.08621e-22
KEGG_B_CELL_RECEPTOR_SIGNALING_PATHWAY	0.0360097	-0.0987114	3.16942e-13
KEGG_CHEMOKINE_SIGNALING_PATHWAY	0.0219789	-0.110841	4.94855e-16
KEGG_CYTOKINE_CYTOKINE_RECEPTOR_INTERACTION	0.00184119	-0.111466	6.6804e-12
KEGG_GRAFT_VERSUS_HOST_DISEASE	0.0879559	-0.191311	5.95903e-17
KEGG_INTESTINAL_IMMUNE_NETWORK_FOR_IGA_PRODUCTION	0.0396682	-0.200405	1.43952e-18
KEGG_MAPK_SIGNALING_PATHWAY	-5.29892e-05	-0.0597287	3.80337e-10
KEGG_NATURAL_KILLER_CELL_MEDIATED_CYTOTOXICITY	0.0522342	-0.111848	1.59005e-19
KEGG_NOD_LIKE_RECEPTOR_SIGNALING_PATHWAY	0.0734951	-0.0557421	8.4307e-13
KEGG_NUCLEOTIDE_EXCISION_REPAIR	0.134239	0.0942533	0.0329816
KEGG_T_CELL_RECEPTOR_SIGNALING_PATHWAY	0.0424203	-0.072303	4.15388e-12
KEGG_TOLL_LIKE_RECEPTOR_SIGNALING_PATHWAY	0.0618707	-0.0794171	1.60822e-16
Pathway	m6Acluster.A	m6Acluster.B	P value
KEGG_ANTIGEN_PROCESSING_AND_PRESENTATION	0.00754419	0.0721263	0.00633722
KEGG_APOPTOSIS	0.0172295	0.0783827	1.42487e-05
KEGG_BASAL_CELL_CARCINOMA	0.0859992	-0.0777167	8.89556e-28
KEGG_BASE_EXCISION_REPAIR	-0.204406	0.0842745	1.92274e-35
KEGG_CELL_ADHESION_MOLECULES_CAMS	0.161528	-0.008055	8.17471e-21
KEGG_ECM_RECEPTOR_INTERACTION	0.158312	-0.0545404	1.2701e-22
KEGG_FOCAL_ADHESION	0.112114	-0.0289834	7.68392e-17
KEGG_GLIOMA	0.0433757	-0.00436079	5.07841e-05
KEGG_MAPK_SIGNALING_PATHWAY	0.0516499	-5.29892e-05	1.59113e-08
KEGG_MELANOMA	0.0522742	-0.00681959	1.18145e-08
KEGG_MISMATCH_REPAIR	-0.234777	0.125427	3.69215e-45
KEGG_NOD_LIKE_RECEPTOR_SIGNALING_PATHWAY	-0.0169646	0.0734951	1.59631e-07
KEGG_NUCLEOTIDE_EXCISION_REPAIR	-0.214222	0.134239	5.11065e-60
KEGG_PATHWAYS_IN_CANCER	0.0260394	0.00354601	0.00420258
KEGG_PPAR_SIGNALING_PATHWAY	0.0524369	-0.0279263	3.08588e-09
KEGG_TGF_BETA_SIGNALING_PATHWAY	0.0655625	0.0099354	8.70536e-05
KEGG_TOLL_LIKE_RECEPTOR_SIGNALING_PATHWAY	0.0130467	0.0618707	0.00283045
KEGG_WNT_SIGNALING_PATHWAY	0.0230114	-0.00425154	0.00322204

## Sheet: S6
Table-S6: The changes of m6Aclusters, ACRG molecular subtypes, gene clusters and m6Ascore
id	m6Acluster	gene.cluster	ACRG.subtype	m6Ascore
GSM1523906	m6Acluster.A	Gene.cluster.A	EMT	Low
GSM1523984	m6Acluster.B	Gene.cluster.B	EMT	High
GSM1523990	m6Acluster.C	Gene.cluster.B	EMT	High
GSM1523844	m6Acluster.C	Gene.cluster.B	EMT	High
GSM1523835	m6Acluster.C	Gene.cluster.B	EMT	High
GSM1523848	m6Acluster.A	Gene.cluster.C	EMT	Low
GSM1523798	m6Acluster.A	Gene.cluster.C	EMT	High
GSM1523846	m6Acluster.A	Gene.cluster.C	EMT	High
GSM1523965	m6Acluster.A	Gene.cluster.C	EMT	High
GSM1523866	m6Acluster.A	Gene.cluster.C	EMT	High
GSM1523981	m6Acluster.A	Gene.cluster.C	EMT	High
GSM1524039	m6Acluster.A	Gene.cluster.C	EMT	High
GSM1524058	m6Acluster.A	Gene.cluster.C	EMT	High
GSM1523945	m6Acluster.A	Gene.cluster.C	EMT	High
GSM1524026	m6Acluster.A	Gene.cluster.C	EMT	High
GSM1523982	m6Acluster.A	Gene.cluster.C	EMT	High
GSM1524059	m6Acluster.A	Gene.cluster.C	EMT	High
GSM1523788	m6Acluster.A	Gene.cluster.C	EMT	High
GSM1523975	m6Acluster.A	Gene.cluster.C	EMT	High
GSM1523935	m6Acluster.A	Gene.cluster.C	EMT	High
GSM1523796	m6Acluster.A	Gene.cluster.C	EMT	High
GSM1523849	m6Acluster.C	Gene.cluster.C	EMT	High
GSM1523886	m6Acluster.A	Gene.cluster.C	EMT	High
GSM1523850	m6Acluster.A	Gene.cluster.C	EMT	High
GSM1523918	m6Acluster.A	Gene.cluster.C	EMT	High
GSM1523948	m6Acluster.A	Gene.cluster.C	EMT	High
GSM1524035	m6Acluster.A	Gene.cluster.C	EMT	High
GSM1523962	m6Acluster.A	Gene.cluster.C	EMT	High
GSM1524010	m6Acluster.A	Gene.cluster.C	EMT	High
GSM1523772	m6Acluster.A	Gene.cluster.C	EMT	High
GSM1523938	m6Acluster.A	Gene.cluster.C	EMT	High
GSM1523774	m6Acluster.A	Gene.cluster.C	EMT	High
GSM1523771	m6Acluster.A	Gene.cluster.C	EMT	High
GSM1523949	m6Acluster.A	Gene.cluster.C	EMT	High
GSM1523773	m6Acluster.A	Gene.cluster.C	EMT	High
GSM1523862	m6Acluster.A	Gene.cluster.C	EMT	High
GSM1523971	m6Acluster.A	Gene.cluster.C	EMT	High
GSM1523968	m6Acluster.A	Gene.cluster.C	EMT	High
GSM1524006	m6Acluster.A	Gene.cluster.C	EMT	High
GSM1523939	m6Acluster.A	Gene.cluster.C	EMT	High
GSM1524062	m6Acluster.A	Gene.cluster.C	EMT	High
GSM1524057	m6Acluster.A	Gene.cluster.C	EMT	High
GSM1523988	m6Acluster.A	Gene.cluster.C	EMT	High
GSM1524029	m6Acluster.A	Gene.cluster.C	EMT	High
GSM1524030	m6Acluster.A	Gene.cluster.C	EMT	High
GSM1523858	m6Acluster.A	Gene.cluster.C	EMT	High
GSM1523947	m6Acluster.B	Gene.cluster.A	MSI	Low
GSM1523776	m6Acluster.B	Gene.cluster.A	MSI	Low
GSM1523910	m6Acluster.B	Gene.cluster.A	MSI	Low
GSM1523870	m6Acluster.B	Gene.cluster.A	MSI	Low
GSM1524061	m6Acluster.B	Gene.cluster.A	MSI	Low
GSM1523863	m6Acluster.B	Gene.cluster.A	MSI	Low
GSM1523885	m6Acluster.B	Gene.cluster.A	MSI	Low
GSM1523800	m6Acluster.B	Gene.cluster.A	MSI	Low
GSM1523964	m6Acluster.B	Gene.cluster.A	MSI	Low
GSM1523823	m6Acluster.B	Gene.cluster.A	MSI	Low
GSM1524069	m6Acluster.B	Gene.cluster.A	MSI	Low
GSM1524054	m6Acluster.B	Gene.cluster.A	MSI	Low
GSM1523860	m6Acluster.B	Gene.cluster.A	MSI	Low
GSM1523744	m6Acluster.B	Gene.cluster.A	MSI	Low
GSM1523801	m6Acluster.B	Gene.cluster.A	MSI	Low
GSM1523901	m6Acluster.B	Gene.cluster.A	MSI	Low
GSM1524068	m6Acluster.B	Gene.cluster.A	MSI	Low
GSM1523791	m6Acluster.B	Gene.cluster.A	MSI	Low
GSM1523851	m6Acluster.B	Gene.cluster.A	MSI	Low
GSM1523727	m6Acluster.A	Gene.cluster.A	MSI	Low
GSM1524002	m6Acluster.A	Gene.cluster.A	MSI	Low
GSM1523888	m6Acluster.B	Gene.cluster.A	MSI	Low
GSM1523909	m6Acluster.B	Gene.cluster.A	MSI	Low
GSM1523880	m6Acluster.B	Gene.cluster.A	MSI	Low
GSM1523876	m6Acluster.B	Gene.cluster.A	MSI	Low
GSM1523830	m6Acluster.B	Gene.cluster.A	MSI	Low
GSM1523821	m6Acluster.A	Gene.cluster.A	MSI	Low
GSM1523929	m6Acluster.B	Gene.cluster.A	MSI	Low
GSM1523847	m6Acluster.B	Gene.cluster.A	MSI	Low
GSM1523979	m6Acluster.B	Gene.cluster.A	MSI	Low
GSM1523871	m6Acluster.C	Gene.cluster.A	MSI	Low
GSM1523838	m6Acluster.B	Gene.cluster.A	MSI	Low
GSM1523779	m6Acluster.B	Gene.cluster.A	MSI	Low
GSM1523921	m6Acluster.B	Gene.cluster.A	MSI	Low
GSM1523770	m6Acluster.B	Gene.cluster.A	MSI	Low
GSM1523833	m6Acluster.B	Gene.cluster.A	MSI	Low
GSM1523810	m6Acluster.B	Gene.cluster.A	MSI	Low
GSM1523775	m6Acluster.B	Gene.cluster.A	MSI	Low
GSM1524032	m6Acluster.A	Gene.cluster.A	MSI	Low
GSM1523728	m6Acluster.B	Gene.cluster.A	MSI	Low
GSM1524008	m6Acluster.B	Gene.cluster.A	MSI	Low
GSM1523856	m6Acluster.B	Gene.cluster.A	MSI	Low
GSM1523983	m6Acluster.B	Gene.cluster.A	MSI	Low
GSM1523867	m6Acluster.B	Gene.cluster.A	MSI	Low
GSM1523790	m6Acluster.B	Gene.cluster.A	MSI	Low
GSM1523811	m6Acluster.B	Gene.cluster.A	MSI	Low
GSM1524048	m6Acluster.B	Gene.cluster.A	MSI	Low
GSM1523780	m6Acluster.B	Gene.cluster.A	MSI	Low
GSM1523813	m6Acluster.B	Gene.cluster.A	MSI	Low
GSM1523822	m6Acluster.A	Gene.cluster.A	MSI	Low
GSM1523864	m6Acluster.B	Gene.cluster.A	MSI	Low
GSM1524041	m6Acluster.B	Gene.cluster.A	MSI	Low
GSM1523868	m6Acluster.B	Gene.cluster.A	MSI	Low
GSM1524000	m6Acluster.A	Gene.cluster.A	MSI	Low
GSM1524025	m6Acluster.B	Gene.cluster.A	MSI	Low
GSM1523797	m6Acluster.B	Gene.cluster.A	MSI	Low
GSM1523889	m6Acluster.A	Gene.cluster.A	MSI	Low
GSM1523785	m6Acluster.A	Gene.cluster.A	MSI	High
GSM1523794	m6Acluster.A	Gene.cluster.A	MSI	High
GSM1523961	m6Acluster.C	Gene.cluster.B	MSI	Low
GSM1523933	m6Acluster.C	Gene.cluster.B	MSI	Low
GSM1523911	m6Acluster.C	Gene.cluster.B	MSI	High
GSM1523825	m6Acluster.B	Gene.cluster.B	MSI	High
GSM1523903	m6Acluster.B	Gene.cluster.B	MSI	High
GSM1523828	m6Acluster.A	Gene.cluster.B	MSI	High
GSM1523952	m6Acluster.A	Gene.cluster.C	MSI	High
GSM1523805	m6Acluster.A	Gene.cluster.C	MSI	High
GSM1523808	m6Acluster.B	Gene.cluster.C	MSI	High
GSM1523865	m6Acluster.B	Gene.cluster.A	MSS/TP53-	Low
GSM1523792	m6Acluster.B	Gene.cluster.A	MSS/TP53-	Low
GSM1523887	m6Acluster.A	Gene.cluster.A	MSS/TP53-	Low
GSM1523815	m6Acluster.B	Gene.cluster.A	MSS/TP53-	Low
GSM1523908	m6Acluster.C	Gene.cluster.A	MSS/TP53-	Low
GSM1523905	m6Acluster.B	Gene.cluster.A	MSS/TP53-	Low
GSM1524017	m6Acluster.C	Gene.cluster.A	MSS/TP53-	Low
GSM1523941	m6Acluster.A	Gene.cluster.A	MSS/TP53-	Low
GSM1523943	m6Acluster.B	Gene.cluster.A	MSS/TP53-	Low
GSM1523854	m6Acluster.C	Gene.cluster.A	MSS/TP53-	Low
GSM1524040	m6Acluster.C	Gene.cluster.A	MSS/TP53-	High
GSM1523950	m6Acluster.B	Gene.cluster.B	MSS/TP53-	Low
GSM1523897	m6Acluster.C	Gene.cluster.B	MSS/TP53-	Low
GSM1523816	m6Acluster.C	Gene.cluster.B	MSS/TP53-	Low
GSM1523959	m6Acluster.C	Gene.cluster.B	MSS/TP53-	Low
GSM1523997	m6Acluster.C	Gene.cluster.B	MSS/TP53-	Low
GSM1523777	m6Acluster.B	Gene.cluster.B	MSS/TP53-	Low
GSM1524012	m6Acluster.C	Gene.cluster.B	MSS/TP53-	Low
GSM1524013	m6Acluster.C	Gene.cluster.B	MSS/TP53-	Low
GSM1523998	m6Acluster.C	Gene.cluster.B	MSS/TP53-	Low
GSM1523765	m6Acluster.B	Gene.cluster.B	MSS/TP53-	Low
GSM1523999	m6Acluster.C	Gene.cluster.B	MSS/TP53-	Low
GSM1524003	m6Acluster.C	Gene.cluster.B	MSS/TP53-	Low
GSM1523745	m6Acluster.B	Gene.cluster.B	MSS/TP53-	Low
GSM1523837	m6Acluster.C	Gene.cluster.B	MSS/TP53-	Low
GSM1523895	m6Acluster.C	Gene.cluster.B	MSS/TP53-	Low
GSM1524023	m6Acluster.C	Gene.cluster.B	MSS/TP53-	Low
GSM1524014	m6Acluster.C	Gene.cluster.B	MSS/TP53-	Low
GSM1523877	m6Acluster.B	Gene.cluster.B	MSS/TP53-	Low
GSM1523824	m6Acluster.C	Gene.cluster.B	MSS/TP53-	Low
GSM1523973	m6Acluster.B	Gene.cluster.B	MSS/TP53-	Low
GSM1523855	m6Acluster.C	Gene.cluster.B	MSS/TP53-	Low
GSM1523953	m6Acluster.C	Gene.cluster.B	MSS/TP53-	Low
GSM1524005	m6Acluster.C	Gene.cluster.B	MSS/TP53-	Low
GSM1523922	m6Acluster.C	Gene.cluster.B	MSS/TP53-	Low
GSM1523928	m6Acluster.C	Gene.cluster.B	MSS/TP53-	Low
GSM1524036	m6Acluster.C	Gene.cluster.B	MSS/TP53-	Low
GSM1523960	m6Acluster.C	Gene.cluster.B	MSS/TP53-	Low
GSM1523932	m6Acluster.C	Gene.cluster.B	MSS/TP53-	Low
GSM1523942	m6Acluster.A	Gene.cluster.B	MSS/TP53-	Low
GSM1523893	m6Acluster.C	Gene.cluster.B	MSS/TP53-	Low
GSM1523974	m6Acluster.C	Gene.cluster.B	MSS/TP53-	Low
GSM1523904	m6Acluster.C	Gene.cluster.B	MSS/TP53-	Low
GSM1523966	m6Acluster.C	Gene.cluster.B	MSS/TP53-	Low
GSM1523829	m6Acluster.C	Gene.cluster.B	MSS/TP53-	Low
GSM1523940	m6Acluster.B	Gene.cluster.B	MSS/TP53-	Low
GSM1524001	m6Acluster.C	Gene.cluster.B	MSS/TP53-	Low
GSM1523891	m6Acluster.C	Gene.cluster.B	MSS/TP53-	Low
GSM1523802	m6Acluster.A	Gene.cluster.B	MSS/TP53-	Low
GSM1523956	m6Acluster.C	Gene.cluster.B	MSS/TP53-	Low
GSM1524011	m6Acluster.A	Gene.cluster.B	MSS/TP53-	Low
GSM1523874	m6Acluster.C	Gene.cluster.B	MSS/TP53-	Low
GSM1523991	m6Acluster.C	Gene.cluster.B	MSS/TP53-	Low
GSM1523806	m6Acluster.C	Gene.cluster.B	MSS/TP53-	High
GSM1523879	m6Acluster.C	Gene.cluster.B	MSS/TP53-	High
GSM1523970	m6Acluster.C	Gene.cluster.B	MSS/TP53-	High
GSM1523746	m6Acluster.C	Gene.cluster.B	MSS/TP53-	High
GSM1523853	m6Acluster.C	Gene.cluster.B	MSS/TP53-	High
GSM1524027	m6Acluster.C	Gene.cluster.B	MSS/TP53-	High
GSM1523934	m6Acluster.A	Gene.cluster.B	MSS/TP53-	High
GSM1523842	m6Acluster.C	Gene.cluster.B	MSS/TP53-	High
GSM1524056	m6Acluster.C	Gene.cluster.B	MSS/TP53-	High
GSM1523807	m6Acluster.C	Gene.cluster.B	MSS/TP53-	High
GSM1523781	m6Acluster.C	Gene.cluster.B	MSS/TP53-	High
GSM1523930	m6Acluster.A	Gene.cluster.B	MSS/TP53-	High
GSM1524007	m6Acluster.C	Gene.cluster.B	MSS/TP53-	High
GSM1523817	m6Acluster.C	Gene.cluster.B	MSS/TP53-	High
GSM1523976	m6Acluster.C	Gene.cluster.B	MSS/TP53-	High
GSM1523995	m6Acluster.C	Gene.cluster.B	MSS/TP53-	High
GSM1524042	m6Acluster.C	Gene.cluster.B	MSS/TP53-	High
GSM1523925	m6Acluster.C	Gene.cluster.B	MSS/TP53-	High
GSM1523977	m6Acluster.C	Gene.cluster.B	MSS/TP53-	High
GSM1524015	m6Acluster.A	Gene.cluster.B	MSS/TP53-	High
GSM1523972	m6Acluster.C	Gene.cluster.B	MSS/TP53-	High
GSM1523954	m6Acluster.A	Gene.cluster.C	MSS/TP53-	Low
GSM1523892	m6Acluster.A	Gene.cluster.C	MSS/TP53-	Low
GSM1523890	m6Acluster.A	Gene.cluster.C	MSS/TP53-	Low
GSM1523784	m6Acluster.A	Gene.cluster.C	MSS/TP53-	Low
GSM1523852	m6Acluster.A	Gene.cluster.C	MSS/TP53-	High
GSM1524051	m6Acluster.A	Gene.cluster.C	MSS/TP53-	High
GSM1523963	m6Acluster.A	Gene.cluster.C	MSS/TP53-	High
GSM1523839	m6Acluster.A	Gene.cluster.C	MSS/TP53-	High
GSM1524004	m6Acluster.A	Gene.cluster.C	MSS/TP53-	High
GSM1523769	m6Acluster.B	Gene.cluster.C	MSS/TP53-	High
GSM1523789	m6Acluster.B	Gene.cluster.C	MSS/TP53-	High
GSM1523872	m6Acluster.B	Gene.cluster.C	MSS/TP53-	High
GSM1523826	m6Acluster.C	Gene.cluster.C	MSS/TP53-	High
GSM1523843	m6Acluster.A	Gene.cluster.C	MSS/TP53-	High
GSM1523993	m6Acluster.A	Gene.cluster.C	MSS/TP53-	High
GSM1523778	m6Acluster.A	Gene.cluster.C	MSS/TP53-	High
GSM1524019	m6Acluster.B	Gene.cluster.C	MSS/TP53-	High
GSM1524072	m6Acluster.A	Gene.cluster.C	MSS/TP53-	High
GSM1523987	m6Acluster.A	Gene.cluster.C	MSS/TP53-	High
GSM1523924	m6Acluster.A	Gene.cluster.C	MSS/TP53-	High
GSM1523994	m6Acluster.A	Gene.cluster.C	MSS/TP53-	High
GSM1524009	m6Acluster.A	Gene.cluster.C	MSS/TP53-	High
GSM1524046	m6Acluster.B	Gene.cluster.C	MSS/TP53-	High
GSM1523768	m6Acluster.C	Gene.cluster.C	MSS/TP53-	High
GSM1523989	m6Acluster.A	Gene.cluster.C	MSS/TP53-	High
GSM1523827	m6Acluster.A	Gene.cluster.C	MSS/TP53-	High
GSM1524044	m6Acluster.C	Gene.cluster.C	MSS/TP53-	High
GSM1524037	m6Acluster.C	Gene.cluster.C	MSS/TP53-	High
GSM1523969	m6Acluster.A	Gene.cluster.C	MSS/TP53-	High
GSM1524022	m6Acluster.A	Gene.cluster.C	MSS/TP53-	High
GSM1524052	m6Acluster.A	Gene.cluster.C	MSS/TP53-	High
GSM1523920	m6Acluster.A	Gene.cluster.C	MSS/TP53-	High
GSM1523857	m6Acluster.A	Gene.cluster.C	MSS/TP53-	High
GSM1523882	m6Acluster.B	Gene.cluster.A	MSS/TP53+	Low
GSM1523883	m6Acluster.C	Gene.cluster.A	MSS/TP53+	Low
GSM1523818	m6Acluster.B	Gene.cluster.A	MSS/TP53+	Low
GSM1523869	m6Acluster.B	Gene.cluster.A	MSS/TP53+	Low
GSM1524043	m6Acluster.B	Gene.cluster.A	MSS/TP53+	Low
GSM1523809	m6Acluster.C	Gene.cluster.A	MSS/TP53+	Low
GSM1523729	m6Acluster.B	Gene.cluster.A	MSS/TP53+	Low
GSM1523836	m6Acluster.B	Gene.cluster.A	MSS/TP53+	Low
GSM1523896	m6Acluster.C	Gene.cluster.A	MSS/TP53+	Low
GSM1523841	m6Acluster.C	Gene.cluster.A	MSS/TP53+	Low
GSM1523873	m6Acluster.A	Gene.cluster.A	MSS/TP53+	Low
GSM1524018	m6Acluster.B	Gene.cluster.A	MSS/TP53+	Low
GSM1523944	m6Acluster.B	Gene.cluster.A	MSS/TP53+	Low
GSM1523812	m6Acluster.A	Gene.cluster.A	MSS/TP53+	Low
GSM1523878	m6Acluster.B	Gene.cluster.A	MSS/TP53+	Low
GSM1524049	m6Acluster.A	Gene.cluster.A	MSS/TP53+	Low
GSM1523985	m6Acluster.A	Gene.cluster.A	MSS/TP53+	High
GSM1523787	m6Acluster.C	Gene.cluster.B	MSS/TP53+	Low
GSM1523926	m6Acluster.B	Gene.cluster.B	MSS/TP53+	Low
GSM1523957	m6Acluster.B	Gene.cluster.B	MSS/TP53+	Low
GSM1523923	m6Acluster.B	Gene.cluster.B	MSS/TP53+	Low
GSM1523898	m6Acluster.C	Gene.cluster.B	MSS/TP53+	Low
GSM1523894	m6Acluster.C	Gene.cluster.B	MSS/TP53+	Low
GSM1523747	m6Acluster.B	Gene.cluster.B	MSS/TP53+	Low
GSM1523782	m6Acluster.C	Gene.cluster.B	MSS/TP53+	Low
GSM1524031	m6Acluster.C	Gene.cluster.B	MSS/TP53+	Low
GSM1524053	m6Acluster.C	Gene.cluster.B	MSS/TP53+	Low
GSM1523861	m6Acluster.C	Gene.cluster.B	MSS/TP53+	Low
GSM1523795	m6Acluster.C	Gene.cluster.B	MSS/TP53+	Low
GSM1523992	m6Acluster.A	Gene.cluster.B	MSS/TP53+	Low
GSM1523803	m6Acluster.C	Gene.cluster.B	MSS/TP53+	Low
GSM1523831	m6Acluster.C	Gene.cluster.B	MSS/TP53+	Low
GSM1523875	m6Acluster.B	Gene.cluster.B	MSS/TP53+	Low
GSM1523946	m6Acluster.C	Gene.cluster.B	MSS/TP53+	Low
GSM1524071	m6Acluster.A	Gene.cluster.B	MSS/TP53+	Low
GSM1524028	m6Acluster.C	Gene.cluster.B	MSS/TP53+	High
GSM1523978	m6Acluster.C	Gene.cluster.B	MSS/TP53+	High
GSM1523799	m6Acluster.C	Gene.cluster.B	MSS/TP53+	High
GSM1524050	m6Acluster.A	Gene.cluster.B	MSS/TP53+	High
GSM1523820	m6Acluster.C	Gene.cluster.B	MSS/TP53+	High
GSM1523840	m6Acluster.A	Gene.cluster.B	MSS/TP53+	High
GSM1523881	m6Acluster.B	Gene.cluster.B	MSS/TP53+	High
GSM1523899	m6Acluster.A	Gene.cluster.B	MSS/TP53+	High
GSM1523859	m6Acluster.C	Gene.cluster.B	MSS/TP53+	High
GSM1524060	m6Acluster.C	Gene.cluster.B	MSS/TP53+	High
GSM1524070	m6Acluster.A	Gene.cluster.B	MSS/TP53+	High
GSM1523814	m6Acluster.C	Gene.cluster.B	MSS/TP53+	High
GSM1524045	m6Acluster.C	Gene.cluster.B	MSS/TP53+	High
GSM1523819	m6Acluster.C	Gene.cluster.B	MSS/TP53+	High
GSM1523845	m6Acluster.C	Gene.cluster.B	MSS/TP53+	High
GSM1524055	m6Acluster.C	Gene.cluster.B	MSS/TP53+	High
GSM1523931	m6Acluster.A	Gene.cluster.C	MSS/TP53+	Low
GSM1524033	m6Acluster.A	Gene.cluster.C	MSS/TP53+	Low
GSM1523951	m6Acluster.A	Gene.cluster.C	MSS/TP53+	Low
GSM1523937	m6Acluster.B	Gene.cluster.C	MSS/TP53+	Low
GSM1523793	m6Acluster.A	Gene.cluster.C	MSS/TP53+	Low
GSM1523927	m6Acluster.B	Gene.cluster.C	MSS/TP53+	Low
GSM1524016	m6Acluster.A	Gene.cluster.C	MSS/TP53+	High
GSM1524020	m6Acluster.A	Gene.cluster.C	MSS/TP53+	High
GSM1523804	m6Acluster.A	Gene.cluster.C	MSS/TP53+	High
GSM1523748	m6Acluster.B	Gene.cluster.C	MSS/TP53+	High
GSM1523832	m6Acluster.A	Gene.cluster.C	MSS/TP53+	High
GSM1524047	m6Acluster.A	Gene.cluster.C	MSS/TP53+	High
GSM1524021	m6Acluster.A	Gene.cluster.C	MSS/TP53+	High
GSM1523884	m6Acluster.B	Gene.cluster.C	MSS/TP53+	High
GSM1524024	m6Acluster.A	Gene.cluster.C	MSS/TP53+	High
GSM1523786	m6Acluster.A	Gene.cluster.C	MSS/TP53+	High
GSM1524038	m6Acluster.A	Gene.cluster.C	MSS/TP53+	High
GSM1523958	m6Acluster.A	Gene.cluster.C	MSS/TP53+	High
GSM1523967	m6Acluster.A	Gene.cluster.C	MSS/TP53+	High
GSM1523980	m6Acluster.A	Gene.cluster.C	MSS/TP53+	High
GSM1523919	m6Acluster.A	Gene.cluster.C	MSS/TP53+	High
GSM1523783	m6Acluster.A	Gene.cluster.C	MSS/TP53+	High
GSM1523996	m6Acluster.A	Gene.cluster.C	MSS/TP53+	High
GSM1523834	m6Acluster.A	Gene.cluster.C	MSS/TP53+	High
GSM1523986	m6Acluster.A	Gene.cluster.C	MSS/TP53+	High
GSM1524034	m6Acluster.A	Gene.cluster.C	MSS/TP53+	High
GSM1523936	m6Acluster.A	Gene.cluster.C	MSS/TP53+	High
GSM1523955	m6Acluster.A	Gene.cluster.C	MSS/TP53+	High

## Sheet: S7
Table-S7: Prognostic analysis of 718 m6A phenotype-related genes using a univariate Cox regression model
Gene	HR	HR.95L	HR.95H	pvalue
RBPMS2	1.51228	1.35747	1.68474	6.06131e-14
SMARCD3	3.62313	2.50485	5.24065	8.15676e-12
ZSCAN18	2.68065	1.98826	3.61416	9.92955e-11
SYNM	1.26466	1.17766	1.35809	1.0705e-10
CTSF	2.13056	1.68543	2.69324	2.52199e-10
TNS1	1.96205	1.58652	2.42648	5.03841e-10
PPP1R3C	1.57159	1.35163	1.82735	4.18661e-09
DAAM2	1.64069	1.38367	1.94546	1.22912e-08
SGCE	1.44335	1.2716	1.63829	1.36986e-08
TPMT	0.306991	0.203737	0.462575	1.64712e-08
CBX6	1.8337	1.48466	2.26479	1.82048e-08
FAM127A	2.02909	1.58519	2.59729	1.93802e-08
EIF5A	0.425471	0.315243	0.574242	2.32697e-08
MRPL44	0.373708	0.263751	0.529508	3.09406e-08
KIF11	0.633515	0.537635	0.746493	4.9842e-08
USP51	2.85653	1.95517	4.17342	5.75981e-08
SOGA1	6.22257	3.21064	12.06	6.12916e-08
TPM2	2.85986	1.94743	4.19978	8.34155e-08
BEX3	1.5206	1.30326	1.77419	1.0054e-07
PBXIP1	2.91303	1.96526	4.31786	1.01182e-07
TSPY26P	3.5891	2.23571	5.76177	1.21383e-07
EPM2AIP1	1.84604	1.4611	2.33239	2.77594e-07
MTHFD2	0.4791	0.361246	0.635403	3.25673e-07
PKIG	1.62288	1.34401	1.95962	4.82081e-07
DKK3	2.27398	1.64485	3.14374	6.644e-07
BRI3BP	0.559993	0.445058	0.704611	7.53396e-07
RGN	1.32637	1.18333	1.4867	1.22773e-06
ESCO2	0.349542	0.227602	0.536813	1.57096e-06
USP43	0.46608	0.341258	0.636558	1.58704e-06
MID2	1.7704	1.40105	2.23713	1.71279e-06
PTTG3P	0.589015	0.473434	0.732813	2.04195e-06
C1QBP	0.558001	0.437932	0.71099	2.3686e-06
KDM1B	0.374302	0.248639	0.563475	2.49599e-06
STIL	0.67397	0.571831	0.794352	2.52991e-06
DEPDC1	0.699067	0.602147	0.811587	2.5818e-06
HMMR	0.701454	0.604778	0.813584	2.77683e-06
PPP3R1	0.44518	0.316651	0.625879	3.2264e-06
SLIT3	2.52875	1.70993	3.73967	3.36558e-06
ARMCX4	3.60592	2.0957	6.20446	3.61958e-06
PIFO	1.41395	1.22029	1.63835	4.04691e-06
CLDN11	2.09722	1.53005	2.87462	4.15196e-06
MYB	0.631936	0.519613	0.768538	4.29506e-06
BAK1	0.411701	0.2818	0.601481	4.47022e-06
PBK	0.749347	0.661917	0.848326	5.14916e-06
CDCA2	0.650448	0.540539	0.782706	5.25786e-06
CARNMT1	0.380073	0.2502	0.577358	5.76238e-06
TMEM55A	1.4794	1.24783	1.75396	6.5122e-06
ASF1B	0.541571	0.414111	0.708262	7.48416e-06
PCDHGA1	2.51663	1.67982	3.7703	7.646e-06
MOCOS	0.651286	0.539142	0.786756	8.68701e-06
PDZRN3	1.84073	1.40452	2.41242	9.79598e-06
CCNA2	0.707433	0.606447	0.825234	1.06135e-05
LOC389641	0.384138	0.2508	0.588364	1.09088e-05
FAM110B	1.90333	1.42855	2.53591	1.10219e-05
CEP55	0.73133	0.636039	0.840898	1.11911e-05
DLGAP5	0.755776	0.666825	0.856593	1.17134e-05
F12	0.544414	0.414691	0.714717	1.19452e-05
RASL12	1.7142	1.34581	2.18343	1.2662e-05
CEP68	2.12325	1.51188	2.98184	1.38876e-05
EZH2	0.673212	0.563134	0.804807	1.40053e-05
DMD	2.10272	1.50286	2.94201	1.44278e-05
PALM2-AKAP2	1.94272	1.43902	2.62273	1.44585e-05
SERINC3	2.50673	1.65298	3.80144	1.52145e-05
GEMIN4	0.433667	0.296891	0.633455	1.54903e-05
RAD18	0.355873	0.222496	0.569204	1.62094e-05
POC1A	0.518007	0.383993	0.698791	1.65879e-05
NANS	0.301795	0.174728	0.521266	1.7358e-05
IL1R1	1.82517	1.38691	2.40194	1.75112e-05
SELM	1.44899	1.22287	1.71692	1.83441e-05
RRM2	0.72852	0.6298	0.842713	2.01356e-05
NDC1	0.628386	0.507383	0.778247	2.06863e-05
FAM83B	0.710071	0.606405	0.831459	2.11675e-05
MPP5	0.43535	0.296726	0.638736	2.11992e-05
ZNF704	1.71792	1.33792	2.20585	2.21279e-05
CCDC88C	0.456696	0.317599	0.656713	2.34726e-05
LIN54	0.38564	0.247595	0.600649	2.50136e-05
NDUFA10	0.120166	0.0448499	0.321958	2.51083e-05
SPATA5	0.447097	0.307066	0.650986	2.6773e-05
MKI67	0.65839	0.541133	0.801055	2.95801e-05
RAD51AP1	0.697048	0.588309	0.825887	3.03747e-05
FAM172A	2.10061	1.4817	2.97803	3.07422e-05
SPIN4	0.729462	0.628555	0.846569	3.28619e-05
EFHD1	1.42511	1.20547	1.68476	3.3505e-05
RRM1	0.579686	0.447641	0.75068	3.55937e-05
RGS5	1.67438	1.31054	2.13922	3.7321e-05
YEATS4	0.605507	0.476901	0.768795	3.81562e-05
MAOB	1.93991	1.41423	2.66099	3.96999e-05
CDC25C	0.458482	0.31607	0.665061	3.97048e-05
PCGF5	0.500405	0.35933	0.696866	4.1782e-05
MAD2L1	0.712395	0.605496	0.838166	4.34807e-05
UHRF1	0.709515	0.601375	0.837101	4.75285e-05
NCAPG	0.728441	0.625277	0.848626	4.77132e-05
CKS2	0.672929	0.55566	0.814946	5.02318e-05
SMC2	0.610556	0.480994	0.775017	5.02798e-05
WFDC1	1.35156	1.16821	1.56369	5.11906e-05
DTX3	5.6931	2.45204	13.2181	5.18897e-05
VASN	1.60773	1.27589	2.02589	5.68419e-05
AP1AR	0.426453	0.281352	0.646384	5.90979e-05
TMPO	0.534919	0.394074	0.726103	5.99897e-05
INCENP	0.343305	0.203612	0.578838	6.04092e-05
WDHD1	0.649293	0.525591	0.80211	6.20788e-05
DYNC1LI2	3.127	1.7896	5.46388	6.23089e-05
RNF138	0.529482	0.387685	0.72314	6.38257e-05
CCNE2	0.708298	0.598069	0.838842	6.43921e-05
CCNB1	0.741477	0.640277	0.858673	6.46824e-05
POLE2	0.682993	0.566425	0.823551	6.52072e-05
LMNB2	0.62328	0.494184	0.7861	6.54026e-05
PLPP3	1.63876	1.28558	2.08897	6.65289e-05
ATXN1	2.32295	1.53394	3.51782	6.87518e-05
ECT2	0.610824	0.478673	0.779459	7.39954e-05
MCM4	0.594634	0.45963	0.769292	7.61622e-05
PA2G4	0.475666	0.329154	0.687393	7.64134e-05
E2F7	0.593284	0.457334	0.769649	8.43545e-05
FEN1	0.646756	0.520173	0.804142	8.80074e-05
COX7A2	0.294879	0.159992	0.543486	9.05841e-05
FANCA	0.329819	0.189247	0.574807	9.08979e-05
NUP37	0.441371	0.292882	0.665143	9.28211e-05
SKA1	0.701115	0.58623	0.838514	0.000100711
CDK1	0.720878	0.611086	0.850396	0.000103507
SHCBP1	0.722627	0.613212	0.851564	0.00010526
NAT1	0.70753	0.593967	0.842804	0.000106253
MCCC2	0.427346	0.277872	0.657226	0.000108311
PLK4	0.58069	0.440926	0.764757	0.00010925
NOP16	0.389882	0.24161	0.629146	0.000114336
BIN3	0.289564	0.154244	0.543602	0.000114906
AHCYL2	0.712596	0.599779	0.846634	0.000116576
MRPL50	0.546196	0.401106	0.743768	0.000123467
PARP3	0.528759	0.38164	0.73259	0.000127907
PTTG1	0.697307	0.579557	0.838981	0.000133251
SAAL1	0.558123	0.413672	0.753015	0.000135471
FANCD2	0.38794	0.238036	0.632247	0.000144854
ASCC3	0.557303	0.412143	0.753588	0.00014609
CNPY4	3.20605	1.75413	5.85974	0.000152857
GAR1	0.450677	0.298204	0.681111	0.000155227
RMND1	0.494161	0.342847	0.712255	0.000157358
REEP4	0.473303	0.320586	0.69877	0.000167748
RGL1	1.56911	1.23957	1.98626	0.000180038
HELLS	0.621577	0.484609	0.797256	0.000181081
FARSA	0.475769	0.322073	0.702812	0.000190276
KNL1	0.58967	0.446683	0.77843	0.000193243
RMI1	0.512255	0.360213	0.728473	0.000196621
LMNB1	0.738597	0.629541	0.866545	0.000201393
MTIF2	0.441072	0.286331	0.67944	0.000204664
CHAF1A	0.416523	0.262322	0.661368	0.000205194
LOC728554	0.587015	0.442995	0.777858	0.000208008
CCDC3	1.5537	1.23044	1.96188	0.000213589
TDP1	0.337078	0.189212	0.600497	0.000223377
FASTKD1	0.524818	0.372405	0.739608	0.000230313
KIF18A	0.754483	0.649431	0.876528	0.000230783
GUF1	0.53693	0.384738	0.749326	0.000255258
RAD51	0.593853	0.448973	0.785484	0.000260088
ZWILCH	0.678783	0.551326	0.835707	0.000260854
ORM1	1.17791	1.07874	1.28618	0.000262992
MRPL42	0.506054	0.350354	0.730949	0.000282815
FSBP	0.582324	0.434811	0.779881	0.000285561
DCHS1	1.72495	1.28258	2.31989	0.000310811
AHSA1	0.478734	0.320699	0.714646	0.00031391
TWF1	0.380792	0.225159	0.644001	0.000316492
AOX1	1.35881	1.14882	1.60719	0.000344033
SCLY	0.331516	0.180874	0.607621	0.000354782
ZNF367	0.69976	0.57515	0.851368	0.000359486
PARPBP	0.637607	0.497651	0.816922	0.000371986
OSER1-AS1	2.94923	1.625	5.35259	0.000375861
C16orf95	0.287938	0.144619	0.573286	0.000394897
RPL13P5	2.03077	1.3715	3.00694	0.00040404
FAM198A	1.37235	1.14997	1.63773	0.000449474
SEC24A	0.579213	0.426481	0.786641	0.000471287
FKBP4	0.46509	0.302403	0.7153	0.00049125
DTL	0.753472	0.64238	0.883776	0.000505015
PLGRKT	0.661143	0.522797	0.836099	0.000551596
ARHGAP11A	0.709915	0.583646	0.863501	0.000606585
CLSPN	0.308925	0.157168	0.607213	0.000657179
TMEM150A	2.09035	1.36647	3.19769	0.000675002
TBC1D9	1.9867	1.3364	2.95343	0.000690239
TIPIN	0.691274	0.558445	0.855698	0.000695424
PALLD	1.46256	1.17327	1.82317	0.000722234
HNRNPF	0.60795	0.455423	0.811561	0.000733739
BUB1B	0.745995	0.629214	0.884451	0.00074205
WDR4	0.547463	0.385717	0.777037	0.00074663
SEC31A	1.95574	1.32401	2.8889	0.00075152
LOC101926921	1.64794	1.23224	2.20387	0.000757076
RPAP2	0.376151	0.2129	0.66458	0.000759892
CACYBP	0.525986	0.361228	0.765892	0.000804836
H2AFZ	0.54358	0.380476	0.776603	0.000811149
CPSF2	0.516051	0.350057	0.760757	0.000835219
NUSAP1	0.745144	0.626852	0.885758	0.00085181
PMAIP1	0.770226	0.660651	0.897976	0.000854912
DNAJC9	0.483587	0.315486	0.741257	0.000856389
ERO1A	0.669195	0.528273	0.84771	0.000870367
MIER1	0.354422	0.191892	0.65461	0.000921354
AURKA	0.695754	0.561141	0.86266	0.000944404
LEPROTL1	0.564162	0.401712	0.792306	0.000954632
GRPEL2	0.380157	0.214143	0.674873	0.000957179
RNF126	0.516997	0.348933	0.766007	0.00100601
NEIL3	0.738122	0.615894	0.884608	0.00101115
AK2	0.405363	0.235896	0.696573	0.00107937
TIMM17A	0.458306	0.286977	0.73192	0.00108855
EAF1	0.524549	0.356091	0.772699	0.00109565
LIN9	0.339068	0.176723	0.65055	0.00114134
VRK1	0.615314	0.459045	0.824779	0.0011595
FAM13B	1.53775	1.18567	1.99438	0.0011796
TRMU	0.437548	0.265404	0.721347	0.00119312
WARS	0.744485	0.622787	0.889963	0.00119496
MND1	0.780107	0.671243	0.906626	0.00120265
F10	1.56902	1.19421	2.06146	0.00121931
MMACHC	0.592893	0.431326	0.81498	0.00128033
CAPN10	0.491066	0.318459	0.757226	0.00128862
POLE3	0.588	0.425148	0.813232	0.00132981
NBN	0.584492	0.420972	0.81153	0.00134047
L2HGDH	0.432982	0.259041	0.72372	0.00140486
HCFC2	1.64718	1.21139	2.23974	0.00145711
HSP90AA1	0.511862	0.338878	0.773147	0.00145911
FAXDC2	1.66367	1.21595	2.27625	0.00146078
BRIP1	0.69378	0.553762	0.869201	0.00147888
ATP9A	1.61627	1.20086	2.17539	0.00153752
HMMR-AS1	0.346453	0.179746	0.667777	0.0015453
WDR34	0.652944	0.500944	0.851064	0.00161753
CENPH	0.72772	0.596933	0.887163	0.00166406
HAUS6	0.697372	0.556578	0.873781	0.00173253
CSNK1G3	0.391769	0.217767	0.704803	0.00176263
HIST1H1E	0.495302	0.318865	0.769365	0.00176706
ARL6IP6	0.447683	0.270317	0.741428	0.00179459
CRBN	1.75225	1.23118	2.49385	0.00183989
PTMA	0.311541	0.149491	0.649257	0.00185292
MRPS2	0.599429	0.434186	0.827562	0.00186948
KCNRG	0.579557	0.410884	0.817473	0.00188105
ORC1	0.682955	0.536379	0.869585	0.0019771
COX18	0.345529	0.176177	0.677672	0.00198732
DCAF17	0.527583	0.351493	0.79189	0.0020283
NINL	1.29685	1.09948	1.52964	0.00202948
TTLL4	0.327555	0.161181	0.665661	0.00203685
MARS2	0.68895	0.543351	0.873565	0.00209884
PAICS	0.610567	0.445544	0.836711	0.00214846
SNRPA	0.570352	0.398401	0.816518	0.00216024
TXNDC15	1.7356	1.21934	2.47042	0.00220648
HNRNPC	0.293669	0.133941	0.643876	0.00222011
CDC42SE2	0.631116	0.46957	0.848238	0.00228054
ENO1	0.58174	0.410655	0.824102	0.00229832
ALYREF	0.635709	0.474872	0.851021	0.00233533
EFCAB11	0.479193	0.298148	0.770177	0.00237704
TMEM33	0.560874	0.386235	0.814477	0.00238065
CDC7	0.719615	0.581177	0.89103	0.00254156
CPOX	0.59725	0.42736	0.834678	0.00254324
MARK1	1.40367	1.12563	1.75041	0.00260707
BUB3	0.461796	0.278834	0.764814	0.00268575
MIR636	0.514838	0.333631	0.794464	0.00270431
DONSON	0.706146	0.562466	0.886529	0.00272091
PDS5A	0.547154	0.368417	0.812606	0.00280561
CHEK1	0.709787	0.566862	0.88875	0.00280793
TXNL4A	0.55734	0.379679	0.818134	0.00283668
MCM6	0.627167	0.460643	0.853891	0.00304487
TYMS	0.698319	0.550074	0.886517	0.00318461
ATP5D	0.577305	0.400253	0.832675	0.00328412
SETSIP	0.499655	0.314204	0.794565	0.0033723
FGF13	1.15838	1.04993	1.27802	0.00337256
NOB1	0.58947	0.413535	0.840254	0.0034744
MAPK13	0.747448	0.614846	0.908648	0.00348474
EXO1	0.773412	0.649552	0.920889	0.003908
PSAT1	0.803622	0.692508	0.932564	0.0039827
BMS1	0.557331	0.373808	0.830954	0.00412209
TSR1	0.555014	0.370989	0.830323	0.00417435
HNF4A	0.519827	0.332184	0.813465	0.00418905
KNTC1	0.648461	0.481901	0.87259	0.00423943
EWSR1	0.34111	0.163088	0.713452	0.00427979
GEN1	0.555535	0.371055	0.831735	0.00430753
PJA2	1.53922	1.14286	2.07305	0.0045255
HAUS8	0.600152	0.421157	0.855221	0.00472173
TIFA	0.623187	0.448855	0.865229	0.00473409
C4orf3	1.58384	1.15056	2.18028	0.00480158
LARS2	0.606887	0.42835	0.859837	0.0049619
RHOBTB3	1.32908	1.08963	1.62115	0.00500289
TIMM44	0.540562	0.351667	0.83092	0.00504163
NOLC1	0.643916	0.473291	0.876054	0.00507214
PAM	1.41283	1.109	1.79989	0.00515128
TSFM	0.578419	0.393912	0.849348	0.00522187
TAF5L	0.555262	0.366578	0.841065	0.00548687
NOP14	0.596621	0.414346	0.85908	0.0054942
NDUFS7	0.433788	0.24048	0.782486	0.00552208
NUDT6	0.739908	0.597268	0.916613	0.00583679
HNRNPL	0.605433	0.423592	0.865336	0.00589351
TIMM23B	0.548656	0.356967	0.843281	0.00619611
PLA2G5	1.7914	1.17909	2.72167	0.0062957
ASPN	1.15302	1.041	1.2771	0.00632375
CNOT11	0.542504	0.349469	0.842165	0.00641976
RAB2B	1.72591	1.16561	2.55555	0.00642628
MRPL16	0.577106	0.388209	0.857918	0.00657729
RFC5	0.621978	0.441284	0.87666	0.00669416
CENPM	0.725589	0.575222	0.915264	0.00678444
NAA15	0.463778	0.265318	0.810687	0.00700706
TIMM13	0.521416	0.324565	0.837658	0.00709497
TMEM177	0.527828	0.331449	0.840558	0.00711116
GSS	0.614059	0.430443	0.876003	0.0071388
LOC100289230	1.52242	1.12063	2.06826	0.00717771
CEP83	0.617907	0.434746	0.878234	0.00727889
EEF1E1	0.64521	0.468475	0.888618	0.00729579
TUFM	0.546773	0.351627	0.85022	0.00735454
GRSF1	0.52652	0.329226	0.842045	0.00741523
DHRS4L2	0.67016	0.499842	0.898512	0.00746685
CHAF1B	0.630572	0.449699	0.884195	0.00750529
ABCE1	0.615119	0.430419	0.879078	0.00764359
C3orf38	0.470005	0.267991	0.824297	0.00843646
FOCAD	0.505654	0.304223	0.840456	0.00852742
GINS3	0.712661	0.553614	0.917402	0.00856262
MTA2	0.634508	0.451799	0.891105	0.00865626
SPATA5L1	0.512121	0.31066	0.84423	0.00869275
FAM149A	1.2394	1.05574	1.45501	0.00872233
OPHN1	1.85243	1.16566	2.94384	0.00909289
VAMP1	2.04534	1.19269	3.50754	0.00931396
APTX	0.463017	0.259131	0.82732	0.00932037
KIF2A	0.685176	0.515221	0.911193	0.00933991
DHX15	0.606879	0.415168	0.887114	0.00992729
SNORD14D	0.523962	0.320428	0.85678	0.00999417
PPP2CB	0.462797	0.257327	0.83233	0.0100876
CLDN4	0.710159	0.547124	0.921777	0.0101094
GPR107	0.486081	0.280381	0.842694	0.0101809
TCOF1	0.526275	0.322521	0.858752	0.0101851
FCF1	0.451152	0.245683	0.82846	0.0102629
GCFC2	0.630005	0.442662	0.896636	0.0102913
DNMT1	0.67151	0.495063	0.910846	0.0104566
GATSL2	1.60334	1.11655	2.30236	0.0105549
DCLRE1B	0.650537	0.46784	0.90458	0.010583
UTP15	0.64544	0.459401	0.906819	0.0116094
PCYOX1	1.47173	1.09003	1.98709	0.011644
MITF	1.43882	1.08321	1.91119	0.0120136
STK26	0.726764	0.566522	0.932331	0.0120289
KIF20A	0.811225	0.688909	0.95526	0.0121118
SHROOM2	1.20189	1.04094	1.38773	0.0121793
CHCHD3	0.419463	0.212274	0.828878	0.0124176
NUP35	0.647919	0.460758	0.911106	0.0125879
TUBGCP4	0.589163	0.387767	0.895159	0.0131786
CBWD7	0.583066	0.380393	0.893724	0.0133019
C4orf46	0.63548	0.44376	0.910032	0.0133414
UBQLN1	0.668334	0.485277	0.920444	0.0136021
ZGRF1	0.393839	0.187734	0.826217	0.0137033
WDR18	0.638844	0.447253	0.912507	0.013767
COQ7	0.566459	0.359955	0.891434	0.0140208
TRIM36	0.564803	0.357459	0.892415	0.0143795
OTUD4	0.467655	0.254254	0.860171	0.0145091
GSTCD	0.536056	0.324812	0.884682	0.0147153
SSX2IP	0.754011	0.60058	0.94664	0.0150003
PRAME	1.16502	1.02976	1.31804	0.0152789
NTMT1	0.577673	0.370654	0.90032	0.0153606
UBE2NL	0.399496	0.190184	0.839174	0.0153938
LOC100506248	0.488818	0.27394	0.872246	0.0154104
FBXL5	1.48093	1.07784	2.03475	0.0154174
LIMCH1	1.30607	1.05212	1.62132	0.0154987
IL6ST	1.71774	1.10777	2.66359	0.0156374
PUSL1	0.656761	0.4669	0.923827	0.0157318
FXN	0.597456	0.393191	0.90784	0.0158261
SENP1	0.605634	0.402005	0.912407	0.0164678
TRA2B	0.544018	0.330521	0.895422	0.0166464
PRMT5	0.653903	0.461343	0.926834	0.0169913
TGFBR2	1.54851	1.08083	2.21854	0.0171403
CCDC58	0.76983	0.620832	0.954588	0.0171525
JAK2	0.788964	0.64923	0.958773	0.0171597
UQCRHL	0.552697	0.339306	0.900291	0.0172232
EPRS	0.693749	0.513295	0.937642	0.0173664
PRELID3B	0.69584	0.516013	0.938335	0.0174446
CCT2	0.761138	0.607058	0.954326	0.0180274
IARS	0.636966	0.438028	0.926254	0.0182275
DCUN1D4	1.57217	1.07887	2.29104	0.0185183
GRPEL1	0.655982	0.461243	0.93294	0.018964
CCT8	0.415039	0.199063	0.865344	0.0189883
SVOPL	1.41866	1.05869	1.90101	0.0191858
CNOT8	0.615664	0.409585	0.925431	0.0196669
MCMBP	0.463316	0.242169	0.886412	0.0201136
PGGT1B	0.687148	0.500171	0.944022	0.0205879
ANP32A	0.597548	0.385459	0.926335	0.0213318
SLBP	0.661839	0.465635	0.940718	0.021414
RMND5A	0.619978	0.411139	0.934899	0.0225382
HSD17B4	0.425527	0.203628	0.889237	0.0230783
ASUN	0.702823	0.518448	0.952768	0.0231084
DCTPP1	0.666143	0.468918	0.946321	0.0233305
GART	0.540212	0.315528	0.924892	0.0247966
PALB2	0.616455	0.403258	0.942369	0.0254773
ZNF736	1.4186	1.04286	1.92971	0.0259298
GINS4	0.513661	0.28573	0.923418	0.0260003
WHSC1	0.663265	0.461354	0.953541	0.0266353
HSPA4L	0.882315	0.789705	0.985786	0.0268974
CHORDC1	0.59329	0.373255	0.943035	0.0272427
MCAT	0.644796	0.436189	0.953169	0.0277731
TOMM22	0.609051	0.390723	0.949377	0.0285725
RAN	0.659792	0.453517	0.959886	0.0297047
CEP78	0.693194	0.49772	0.965439	0.0301539
PAPLN	1.32876	1.02748	1.71837	0.0302656
CCDC59	0.587038	0.361684	0.952802	0.0311131
GLMN	0.701483	0.507443	0.969723	0.0318688
PPIP5K2	0.735642	0.555517	0.974174	0.0321476
SLIRP	0.616313	0.394932	0.961792	0.0330453
TATDN3	0.646579	0.43243	0.966779	0.0336225
MRPS30	0.694356	0.495451	0.973113	0.0341554
PSMA3	0.415255	0.184088	0.93671	0.0342181
HDGF	0.685108	0.482666	0.972458	0.0343239
BCORL1	0.297013	0.0959991	0.918935	0.0351462
ZSWIM3	1.53358	1.026	2.29227	0.0370583
TXNIP	1.23323	1.01168	1.50331	0.0380002
RIOK2	0.682402	0.475622	0.979082	0.038011
CXXC5	1.26087	1.01284	1.56962	0.0380639
FOPNL	0.663224	0.449037	0.979577	0.0390498
CLINT1	0.603322	0.373086	0.975639	0.0393474
NUTM2A-AS1	1.25317	1.01049	1.55411	0.0398758
C7orf13	1.26936	1.01055	1.59445	0.0403432
MRPL15	0.715273	0.518543	0.98664	0.0411593
SPTLC1	0.703331	0.50063	0.988104	0.0424626
GGT7	1.38489	1.00943	1.90001	0.0435779
GMPS	0.683057	0.470443	0.991759	0.0451282
GFM1	0.609377	0.373946	0.993031	0.0468082
TFEB	1.39116	1.00461	1.92645	0.0468489
CDC23	0.736833	0.545149	0.995917	0.046969
ZMIZ1	2.09221	1.00476	4.35662	0.0485347
CNOT10	0.670424	0.450313	0.998122	0.0489277
USP1	0.741236	0.549564	0.999756	0.0498137
LY75-CD302	1.19105	0.997884	1.4216	0.0528066
EPAS1	1.94784	0.988894	3.83668	0.0538958
PPDPF	1.39523	0.992375	1.96163	0.0553738
NAIP	1.3797	0.992385	1.91818	0.0555566
DDI2	0.589197	0.341996	1.01508	0.0566451
RRN3	0.691677	0.471187	1.01534	0.0598066
F11R	0.781384	0.603538	1.01164	0.061185
SEC31B	1.5055	0.980746	2.31102	0.061338
TRABD2B	2.10271	0.964614	4.58357	0.0615744
ATP8B4	1.20848	0.989357	1.47613	0.0635767
MAPK1IP1L	0.483627	0.22386	1.04483	0.0645458
PIGT	1.55824	0.971343	2.49976	0.0658575
CCDC18	0.584009	0.329251	1.03589	0.0658586
FKBP15	0.429921	0.173089	1.06784	0.0689792
CEP295	0.545717	0.283831	1.04924	0.069394
BDKRB1	1.29915	0.978205	1.7254	0.0706448
MPHOSPH9	0.722237	0.507213	1.02842	0.0711413
TTC9	1.21788	0.983114	1.5087	0.0712166
EBP	0.717047	0.4993	1.02975	0.0716717
GTPBP3	0.628285	0.37778	1.0449	0.0733359
LOC643733	1.42671	0.96636	2.10636	0.0738063
NUP107	0.752287	0.550288	1.02843	0.0743892
UBA2	0.68076	0.446144	1.03876	0.0744885
ZCCHC4	0.552341	0.287412	1.06147	0.0749172
IKBKAP	0.65579	0.410571	1.04747	0.0774203
BCCIP	0.703713	0.476253	1.03981	0.0777334
SLC39A10	1.1997	0.979917	1.46878	0.0778212
INTS2	0.728735	0.512561	1.03608	0.0779767
UBE2C	0.866508	0.738668	1.01647	0.0785178
JKAMP	0.701499	0.471966	1.04266	0.0795402
MCM8	0.682777	0.444545	1.04868	0.0813567
NFIC	1.36709	0.96101	1.94475	0.0820695
GEMIN2	0.764305	0.564073	1.03562	0.0828869
ZNF232	0.768894	0.571242	1.03493	0.083011
NOC3L	0.74975	0.540763	1.0395	0.0840627
MCM5	0.776872	0.583199	1.03486	0.0843956
DSN1	0.794812	0.612097	1.03207	0.0848649
MYBL2	0.797181	0.615614	1.0323	0.0856294
STK35	0.513498	0.239929	1.09899	0.0860113
GET4	0.574486	0.303728	1.08661	0.0882833
TEX10	0.658701	0.407359	1.06512	0.0886329
CHD9	1.49926	0.940045	2.39114	0.0890617
SLCO2A1	1.15822	0.976709	1.37347	0.091223
ATG10	0.644401	0.386292	1.07497	0.0923626
PCM1	0.717182	0.486534	1.05717	0.0931255
SUPV3L1	0.736831	0.515876	1.05242	0.0931414
LOC100507334	1.1106	0.981579	1.25659	0.0959349
CTSO	1.18372	0.970115	1.44436	0.096684
AFDN	0.544178	0.265315	1.11614	0.0968807
MRPS22	0.709171	0.470219	1.06955	0.101165
HIC2	1.34119	0.94025	1.91308	0.105238
CEP152	0.564679	0.281545	1.13254	0.10752
PLCL2	0.819686	0.643265	1.04449	0.107848
YARS2	0.718858	0.479771	1.07709	0.109599
NAA35	0.778152	0.571948	1.0587	0.110301
TM6SF1	1.14791	0.96745	1.36202	0.113938
PLEKHG6	0.825674	0.647804	1.05238	0.121745
TTR	1.09375	0.975637	1.22616	0.124306
RPIA	0.781597	0.569977	1.07179	0.126112
TWISTNB	0.770663	0.549027	1.08177	0.132152
BTLA	0.805801	0.608155	1.06768	0.132622
HLA-DRB1	0.871366	0.727562	1.04359	0.134582
SUPT16H	0.78353	0.566254	1.08418	0.140965
STX3	0.785988	0.568436	1.0868	0.145252
STARD4	0.853854	0.689994	1.05663	0.146143
ILF3	0.728133	0.470281	1.12736	0.154887
VSIG10	0.835224	0.651251	1.07117	0.156075
RNF114	0.744567	0.495107	1.11972	0.156539
WDR89	0.711614	0.442375	1.14472	0.160704
VWA5A	0.863835	0.703399	1.06086	0.162614
NCR3LG1	0.907379	0.789832	1.04242	0.169728
RPUSD2	0.745712	0.487181	1.14144	0.176726
EIF2S2	0.737602	0.474219	1.14727	0.176888
CLEC2B	1.12282	0.949032	1.32843	0.176944
HINT1	0.727194	0.456194	1.15918	0.180551
PPP1R8	0.697126	0.410991	1.18247	0.18081
KHSRP	0.633844	0.323376	1.24239	0.184214
SREK1	1.73928	0.766711	3.94553	0.185393
PARP2	0.747064	0.484826	1.15114	0.186204
PVR	0.621991	0.304924	1.26875	0.191719
PPP4R3A	0.721393	0.439782	1.18333	0.1959
MRPL54	0.791438	0.55508	1.12844	0.196238
CFHR1	1.10344	0.949879	1.28183	0.197947
PARS2	0.773266	0.522265	1.1449	0.199081
ATP11A	0.764161	0.503615	1.1595	0.20611
NPM3	0.86467	0.689667	1.08408	0.20758
MRPS36	0.792373	0.551706	1.13802	0.20768
CDK12	0.759952	0.491696	1.17456	0.216577
CPNE1	1.15106	0.918442	1.4426	0.221947
RHEB	1.4464	0.798769	2.61913	0.223109
ITCH	1.33464	0.830968	2.14361	0.232461
ITPA	0.787834	0.532403	1.16581	0.233
TSPAN31	1.23718	0.871968	1.75537	0.233099
PPP2CA	0.756962	0.473931	1.20902	0.243826
DNMT3B	1.10782	0.932534	1.31606	0.243954
HAUS3	0.81114	0.569098	1.15612	0.247015
CEP120	0.815316	0.576801	1.15246	0.247541
CBR3	0.898847	0.748294	1.07969	0.254209
CREB3L2	1.38737	0.789201	2.43892	0.255331
BRF2	0.782598	0.51245	1.19516	0.256494
CCDC112	0.780538	0.506402	1.20308	0.261679
RTKN	0.763392	0.474717	1.22761	0.265325
PTPN11	0.736816	0.429907	1.26283	0.266541
MS4A6A	1.12891	0.910871	1.39913	0.268135
CD63	1.40091	0.770476	2.54718	0.269087
MAK16	0.835325	0.606514	1.15045	0.270565
TMEM176A	1.10094	0.923874	1.31194	0.282419
ZFP64	0.644245	0.288385	1.43923	0.283666
TET3	0.710998	0.379916	1.3306	0.286111
LOC730268	0.776608	0.486993	1.23846	0.288336
SEC61A2	1.42095	0.742667	2.71873	0.288566
ZNF654	1.29656	0.801888	2.09638	0.289431
ZNF561	0.810879	0.548903	1.19789	0.292337
VPS37A	0.849401	0.624835	1.15468	0.297454
CSTF1	0.818892	0.559415	1.19872	0.304103
CCDC171	0.518562	0.148057	1.81623	0.304497
PUS7	0.879034	0.687063	1.12464	0.305088
CDKN2AIP	0.869694	0.665397	1.13672	0.306798
LINC00261	1.04151	0.962902	1.12653	0.309731
TRAF3IP3	1.14681	0.876864	1.49986	0.317137
ATG7	0.720865	0.379342	1.36986	0.317694
E2F1	0.683697	0.323721	1.44397	0.318851
RASSF5	0.834341	0.583867	1.19227	0.320021
GZMK	1.06156	0.942811	1.19526	0.323649
ZNF444	1.2811	0.777343	2.11131	0.331135
FAM114A2	1.21418	0.818513	1.80111	0.334754
UQCRQ	0.793874	0.496374	1.26968	0.335335
GGH	0.938273	0.82411	1.06825	0.335775
ATG12	0.803547	0.514263	1.25556	0.336792
FBXL17	0.784219	0.473759	1.29813	0.344526
DHX29	1.24338	0.7902	1.95646	0.346267
GGCX	0.796414	0.495424	1.28027	0.347287
LRP2	1.09065	0.908986	1.30863	0.350576
BTF3	0.708502	0.343583	1.461	0.350695
LHFPL2	1.15281	0.853538	1.55702	0.353777
TRAC	0.900297	0.719484	1.12655	0.358508
EVI2A	1.06982	0.923533	1.23927	0.368335
LOC257152	1.21963	0.790179	1.88248	0.369955
DOCK8	0.884173	0.67443	1.15914	0.372915
LSM14B	0.774766	0.439262	1.36653	0.378095
NXT1	1.16463	0.824154	1.64577	0.38769
MCTP1	1.09866	0.885149	1.36367	0.393435
P2RY14	1.05663	0.930653	1.19965	0.395113
ZNF700	0.856906	0.599577	1.22468	0.396677
PRKACB	1.07087	0.913415	1.25547	0.398756
C22orf29	1.18329	0.796523	1.75785	0.404619
C6orf106	0.812776	0.498672	1.32473	0.405568
CDC25B	0.921691	0.759694	1.11823	0.408318
HLA-DPB1	0.909873	0.72713	1.13854	0.408983
GRB7	0.933128	0.791468	1.10014	0.41001
SOCS7	1.1826	0.79319	1.7632	0.410499
EIF3B	1.16965	0.798266	1.7138	0.421415
EIF6	0.884926	0.65446	1.19655	0.427072
TARP	0.915281	0.734055	1.14125	0.431669
FAM122B	1.12949	0.833229	1.53108	0.432749
GPR158	1.04889	0.93076	1.182	0.433669
C9orf40	0.913	0.726213	1.14783	0.435758
PDRG1	1.13818	0.821781	1.5764	0.436066
ISG20L2	0.818731	0.488407	1.37246	0.447983
STK25	0.863807	0.590574	1.26345	0.45047
PAX5	1.09604	0.859253	1.39809	0.460226
TOMM34	0.890328	0.652923	1.21405	0.462861
KAT2B	1.08462	0.87275	1.34792	0.463848
TRG-AS1	0.914413	0.719206	1.1626	0.465226
PYHIN1	0.901209	0.68044	1.19361	0.468128
ACTR5	1.13897	0.799955	1.62165	0.470409
TOX	0.936341	0.781376	1.12204	0.476122
XPO5	0.909539	0.700491	1.18097	0.476713
PSMA7	0.876847	0.608733	1.26305	0.480313
LRIF1	1.06128	0.899686	1.2519	0.48037
SCARB1	1.20975	0.700641	2.08878	0.494417
FOXO3	1.1309	0.790991	1.61688	0.500026
GIMAP4	1.06008	0.894639	1.25611	0.500362
RBAK	0.89576	0.648883	1.23656	0.503377
BRPF3	0.75254	0.325564	1.73949	0.506035
RGL4	0.894273	0.642751	1.24422	0.507223
CFHR2	1.11538	0.805723	1.54404	0.510484
CYLD	1.15572	0.744621	1.79377	0.518771
G2E3	0.899499	0.650716	1.2434	0.5214
CD52	1.05011	0.903671	1.22027	0.523433
P2RY10	0.934754	0.759114	1.15103	0.525185
SLC29A3	1.10274	0.815049	1.49198	0.526038
MTG2	0.804634	0.402297	1.60935	0.538825
MOCS3	1.09795	0.811964	1.48466	0.543883
WDR41	0.876153	0.570263	1.34612	0.546229
RPS29	0.842107	0.480753	1.47507	0.54793
TMEM167A	0.876762	0.570835	1.34664	0.54805
SQLE	0.946731	0.791533	1.13236	0.549017
SMAD2	0.857258	0.512789	1.43313	0.556913
UBE2D2	0.847941	0.485888	1.47977	0.561526
NFS1	1.12447	0.751484	1.68259	0.568325
POLR3GL	0.900778	0.627223	1.29364	0.571502
MAP7D2	0.976213	0.897654	1.06165	0.573831
SRGAP1	1.14871	0.706008	1.86902	0.576681
FOXA2	1.06325	0.850349	1.32945	0.590606
THUMPD2	0.889512	0.579913	1.3644	0.591669
PHAX	0.879124	0.546302	1.41471	0.595603
GIMAP2	1.04692	0.882237	1.24235	0.599501
LRRK2	1.0417	0.893644	1.21429	0.601425
LOC157860	0.926025	0.691398	1.24027	0.606185
SLC39A1	1.10929	0.747375	1.64646	0.606715
ESF1	1.07556	0.813582	1.42189	0.60906
CCNE1	0.941321	0.74175	1.19459	0.61889
GPR171	0.965861	0.840068	1.11049	0.625619
CSE1L	1.08041	0.788975	1.47949	0.629666
ATP10D	1.05071	0.858447	1.28602	0.63144
DPM1	1.10515	0.732429	1.66755	0.63381
CD53	1.08503	0.773878	1.52129	0.636008
LYST	1.16057	0.615385	2.18875	0.645483
PDP1	0.950346	0.763421	1.18304	0.648563
METTL1	0.912319	0.614154	1.35524	0.649486
PARP8	0.948986	0.756718	1.19011	0.650342
PIGU	0.935093	0.697476	1.25366	0.653691
WIPF1	1.05119	0.84113	1.31372	0.660714
EFNA1	1.05069	0.842477	1.31037	0.660788
GRINA	0.921054	0.629238	1.3482	0.672268
MKKS	1.07359	0.770977	1.49499	0.674236
SNHG17	0.922942	0.634323	1.34288	0.675142
ATP5I	0.920989	0.626527	1.35384	0.675411
TRIB3	1.04429	0.850934	1.28159	0.678253
SRP19	0.91188	0.587464	1.41545	0.68093
FANCM	0.906731	0.563993	1.45775	0.686091
PRR11	0.923412	0.626709	1.36058	0.687006
GIN1	0.940267	0.69466	1.27271	0.69008
ADRM1	0.934335	0.668671	1.30555	0.690692
LOC101929240	0.841618	0.352463	2.00963	0.697806
AHCY	1.05636	0.799102	1.39643	0.700223
TRAPPC11	0.916768	0.588993	1.42695	0.700268
NDRG3	0.936435	0.667612	1.3135	0.703642
MCUR1	0.9552	0.754252	1.20969	0.703695
TMEM161B	0.916123	0.580631	1.44546	0.706537
SNAPC3	0.932526	0.648067	1.34184	0.706727
NUFIP1	1.05541	0.7887	1.41231	0.71671
POU2F1	0.861778	0.381566	1.94635	0.720442
RAE1	1.07383	0.718176	1.6056	0.728552
MBLAC2	1.07907	0.699916	1.66361	0.730436
NKD2	0.930623	0.618048	1.40128	0.73061
DHCR7	0.960185	0.760515	1.21228	0.73267
CSNK2A1	0.938222	0.650545	1.35311	0.732861
CD2	0.971146	0.81941	1.15098	0.735538
C5orf24	1.0749	0.70538	1.63801	0.736814
RPL7L1	0.940888	0.658838	1.34369	0.737528
PSIP1	0.950977	0.706571	1.27992	0.740162
NEK3	0.968577	0.801464	1.17053	0.741087
MIAT	0.944691	0.672078	1.32788	0.743272
RGS18	0.975541	0.839749	1.13329	0.746086
NAA20	1.05711	0.754548	1.48099	0.746822
JADE3	0.957772	0.733527	1.25057	0.751227
NANP	0.953599	0.706359	1.28738	0.756344
CDK5RAP1	0.942089	0.641356	1.38384	0.761069
DNTTIP1	1.04992	0.766111	1.43886	0.761929
GTF2IRD1	0.958486	0.727059	1.26358	0.76363
CPSF4	0.937404	0.61189	1.43609	0.766457
KIF5B	0.943666	0.636884	1.39822	0.772554
PSTPIP1	0.951852	0.674537	1.34318	0.778834
CLCN2	0.952054	0.674602	1.34362	0.779836
ZNF556	1.04452	0.769553	1.41772	0.779919
SRXN1	1.0463	0.75988	1.44069	0.781511
NSA2	1.05404	0.721663	1.5395	0.785393
HS2ST1	0.958275	0.690614	1.32967	0.798704
RPRD1B	0.915927	0.450059	1.86403	0.8086
MIR4647	0.965102	0.722387	1.28937	0.810062
ZNF786	1.04827	0.712167	1.543	0.811095
ANKRD44	0.95861	0.67375	1.36391	0.814248
EVI2B	0.982845	0.846793	1.14076	0.819935
ARHGAP9	1.02553	0.823998	1.27636	0.821325
TNFAIP8	1.02871	0.797808	1.32645	0.827221
TMEM185B	1.04099	0.719228	1.5067	0.83137
IPCEF1	1.02894	0.786793	1.34562	0.834897
CCR5	1.01891	0.85241	1.21794	0.836948
PACSIN3	1.02775	0.78886	1.33899	0.83928
PVRIG	1.0201	0.839857	1.23902	0.841029
C1QA	1.0184	0.849943	1.22025	0.843312
MEST	0.985265	0.841423	1.1537	0.853731
TRMT6	0.975554	0.747281	1.27356	0.855602
LTF	0.994507	0.93715	1.05537	0.855796
NLRC3	0.983928	0.825706	1.17247	0.856254
SLC9A8	0.971352	0.707077	1.3344	0.857621
CHN2	1.02648	0.767482	1.37287	0.86018
EPB41L5	1.03368	0.71278	1.49906	0.861331
LAPTM4B	1.01675	0.841988	1.22779	0.862921
NMB	0.981512	0.786958	1.22417	0.868508
CNTNAP2	0.98491	0.822103	1.17996	0.868995
HCST	1.01982	0.80514	1.29173	0.870741
TOMM6	1.02725	0.741593	1.42293	0.871543
TGIF2-C20orf24	0.972614	0.686984	1.377	0.875608
GVINP1	0.969324	0.644907	1.45694	0.880878
ZSCAN25	1.0462	0.570885	1.91728	0.883801
TRIM22	0.988603	0.847428	1.1533	0.884079
GPR18	1.01055	0.868616	1.17567	0.891933
BANK1	0.988796	0.838742	1.16569	0.893261
MED20	0.972634	0.630803	1.4997	0.900054
SLA	1.0121	0.826593	1.23925	0.907278
LYRM7	0.980488	0.685311	1.4028	0.914134
CD3D	0.990374	0.818077	1.19896	0.92099
C12orf60	1.02347	0.645971	1.62159	0.921283
UBL4A	0.984441	0.686547	1.41159	0.932038
MRGBP	0.989994	0.775794	1.26334	0.935571
UCKL1	1.02469	0.531357	1.97605	0.941976
NAIF1	1.01552	0.49989	2.06301	0.966034
ABTB2	1.01103	0.556193	1.8378	0.971311
LST1	1.00265	0.823627	1.22059	0.978946
CETN3	0.99757	0.727995	1.36697	0.987922
VPS13C	0.996428	0.626009	1.58603	0.98796
TRAT1	1.00076	0.867777	1.15412	0.991696
ITK	1.00026	0.853401	1.17238	0.997469

## Sheet: S8
Table-S8: Functional annotation for m6A phenotype -related genes (Gene Ontology-Biological process)
ID	Description	p.adjust	geneID	Count
GO:0019882	antigen processing and presentation	0.0223201	KIF18A/SEC31A/CENPE/KIF11/KIF22/CTSF/PSMA2/KIF2A/PSMA4/PSMA3/CHUK/PSMB7/PSMC1/AP1S3/RAB35/PSMD3/DYNC1LI2/RAB27A/CTSH/FGL2/PSMD4/PSMA7/FCGR2B/CTSV/PSMF1/DCTN6/NCF1/HLA-DPB1/HLA-DRB1/SEC24A/PSMB10/CD8A	32
GO:0019884	antigen processing and presentation of exogenous antigen	0.0242462	KIF18A/SEC31A/CENPE/KIF11/KIF22/CTSF/PSMA2/KIF2A/PSMA4/PSMA3/CHUK/PSMB7/PSMC1/AP1S3/PSMD3/DYNC1LI2/PSMD4/PSMA7/FCGR2B/CTSV/PSMF1/DCTN6/NCF1/HLA-DPB1/HLA-DRB1/SEC24A/PSMB10	27
GO:0002478	antigen processing and presentation of exogenous peptide antigen	0.0213323	KIF18A/SEC31A/CENPE/KIF11/KIF22/CTSF/PSMA2/KIF2A/PSMA4/PSMA3/CHUK/PSMB7/PSMC1/AP1S3/PSMD3/DYNC1LI2/PSMD4/PSMA7/FCGR2B/CTSV/PSMF1/DCTN6/NCF1/HLA-DPB1/HLA-DRB1/SEC24A/PSMB10	27
GO:0050851	antigen receptor-mediated signaling pathway	9.99933e-05	STOML2/PAWR/UBE2N/PSMA2/PSMA4/PSMA3/CHUK/RC3H2/PSMB7/RIPK2/RNF31/PSMC1/PSMD3/BCL2/PIK3CB/CBFB/NCKAP1L/CYLD/TRBC1/PSMD4/KLHL6/LPXN/PSMA7/FCGR2B/PVRIG/ITK/PSMF1/PLCL2/CD3D/TRAC/TESPA1/HLA-DPB1/TRAT1/HLA-DRB1/PAX5/PSMB10/CD160/THEMIS/LCK/PTPRC/NECTIN2	41
GO:0036037	CD8-positive, alpha-beta T cell activation	0.03358	BCL2/CBFB/NCKAP1L/GPR18/EOMES/CD274/IRF1	7
GO:0043374	CD8-positive, alpha-beta T cell differentiation	0.0121219	BCL2/CBFB/NCKAP1L/GPR18/EOMES/IRF1	6
GO:0051236	establishment of RNA localization	0.00253766	NUP37/RAN/NUP205/NDC1/NUP58/NCBP1/NUP35/CPSF2/NUP85/EIF5A/SDAD1/ALYREF/DHX9/SLBP/TGFBR2/SRSF6/SIDT2/SRSF1/FIP1L1/NUP50/XPO5/NUP107/KHSRP/NUP54/RIOK2/NXT1/RAE1/CPSF4/PHAX/IGF2BP3/FLOT1	31
GO:0030098	lymphocyte differentiation	0.0231129	FANCD2/MYB/TGFBR2/FANCA/ZMIZ1/RC3H2/RIPK2/NCAPH2/BAK1/BCL2/TOX/XBP1/DOCK10/LY9/CBFB/NCKAP1L/CYLD/DOCK2/SASH3/IKZF1/FCGR2B/GPR18/HDAC5/PLCL2/CD3D/HNF1A/CD2/RPS6/RHOH/MAFB/TESPA1/ITGA4/PTGER4/EOMES/FLT3LG/FZD5/RASGRP1/THEMIS/BLNK/LCK/PTPRC/IRF1/RARA	43
GO:0032259	methylation	0.0242462	PRMT5/CARNMT1/EZH2/TGS1/MIS18A/KDM1B/WDR4/HIST1H1E/NTMT1/TYMS/TRMT10C/PAXBP1/SNW1/MYB/DNMT1/MTA2/ZCCHC4/SNRPB/INMT/TPMT/PWP1/NSUN4/DPH5/TRMT6/AHCY/ICMT/EHMT2/SMYD1/TET3/METTL1/GAMT/TRMT61A/DNMT3B/PNMT/PAX5/HSD17B10/GNAS/TET2/KMT5B/PCMTD2/MAT2B/METTL14/NSUN7/METTL7B	44
GO:0006397	mRNA processing	0.00383148	HNRNPC/SNRPF/CCNB1/PRMT5/TGS1/NCBP1/TTF2/PRPF40A/C1QBP/CPSF2/GEMIN4/PDE12/GEMIN5/GEMIN2/PTBP3/SYNCRIP/GCFC2/GRSF1/ALYREF/DHX9/SNRNP40/PPP1R8/TRA2B/HNRNPL/TXNL4A/SNW1/PHF5A/HNRNPF/SNRPA/SLBP/PPIH/SRSF6/FASTKD5/SRSF1/FIP1L1/CCNT1/SNRPB/SMN2/DHX15/TSEN2/NOCT/CELF2/KHSRP/HNRNPR/LEO1/PNN/WDR77/ZPR1/CSTF1/CDK12/TSEN54/DHX16/CCNH/CPSF4/SNRPB2/FAM172A/CWC27/HNRNPA0/PSIP1/SREK1/CTNNBL1/RBM27/METTL14/PPIL3…	65
GO:0000398	mRNA splicing, via spliceosome	0.0145641	HNRNPC/SNRPF/PRMT5/TGS1/NCBP1/PRPF40A/C1QBP/CPSF2/GEMIN4/GEMIN5/GEMIN2/SYNCRIP/GCFC2/ALYREF/DHX9/SNRNP40/TRA2B/HNRNPL/TXNL4A/SNW1/PHF5A/HNRNPF/SNRPA/PPIH/SRSF6/SRSF1/FIP1L1/SNRPB/SMN2/DHX15/CELF2/HNRNPR/PNN/WDR77/CSTF1/DHX16/CPSF4/SNRPB2/FAM172A/CWC27/HNRNPA0/PSIP1/SREK1/CTNNBL1/METTL14/PPIL3	46
GO:0051028	mRNA transport	0.0345779	NUP37/NUP205/NDC1/NUP58/NCBP1/NUP35/CPSF2/NUP85/EIF5A/ALYREF/DHX9/SLBP/SRSF6/SRSF1/FIP1L1/NUP50/NUP107/KHSRP/NUP54/NXT1/RAE1/CPSF4/IGF2BP3	23
GO:0032728	positive regulation of interferon-beta production	0.049258	DHX9/HMGB2/PTPN11/RIPK2/POLR3C/POLR3F/IRF1/FLOT1	8
GO:0050854	regulation of antigen receptor-mediated signaling pathway	0.0145641	PAWR/CBFB/CYLD/LPXN/FCGR2B/PVRIG/PLCL2/TESPA1/TRAT1/PAX5/CD160/LCK/PTPRC/NECTIN2	14
GO:1902036	regulation of hematopoietic stem cell differentiation	0.0170183	PSMA2/PUS7/PSMA4/PSMA3/MYB/PSMB7/PSMC1/PSMD3/TAL1/CBFB/PSMD4/PSMA7/PSMF1/ITCH/PSMB10	15
GO:0061013	regulation of mRNA catabolic process	0.00469298	HNRNPC/EXOSC2/PDE12/SYNCRIP/DHX9/PSMA2/ANP32A/PSMA4/PSMA3/CIRBP/PSMB7/FASTKD1/PSMC1/NOCT/KHSRP/PSMD3/MOV10/HNRNPR/PSMD4/CNOT8/PSMA7/PSMF1/IGF2BP3/E2F1/HNRNPA0/PSMB10/METTL14/NANOS1/ROCK2/DCP2	30
GO:0043488	regulation of mRNA stability	0.00351425	HNRNPC/EXOSC2/PDE12/SYNCRIP/DHX9/PSMA2/ANP32A/PSMA4/PSMA3/CIRBP/PSMB7/FASTKD1/PSMC1/NOCT/KHSRP/PSMD3/MOV10/HNRNPR/PSMD4/PSMA7/PSMF1/IGF2BP3/E2F1/HNRNPA0/PSMB10/METTL14/ROCK2/DCP2	28
GO:0043487	regulation of RNA stability	0.0026668	HNRNPC/EXOSC2/PDE12/SYNCRIP/DHX9/PSMA2/ANP32A/PSMA4/PSMA3/NAF1/CIRBP/PSMB7/FASTKD1/PSMC1/NOCT/KHSRP/PSMD3/MOV10/HNRNPR/PSMD4/PSMA7/PSMF1/IGF2BP3/E2F1/HNRNPA0/PSMB10/METTL14/ROCK2/DCP2	29
GO:0006417	regulation of translation	0.00484216	NOLC1/DHFR/PA2G4/GUF1/NCBP1/C1QBP/ILF3/MTIF2/GEMIN5/TCOF1/EIF5A/RMND1/SYNCRIP/METAP1/TYMS/TRMT10C/DHX9/SHMT2/PUS7/EPRS/GAPDH/ZCCHC4/TSFM/CIRBP/UHMK1/TRAP1/KHSRP/MOV10/HNRNPR/NSUN4/DPH5/FASTKD2/LSM14B/CDK5RAP1/NOTCH4/EIF4E3/BANK1/CNOT11/GRB7/DHX29/FOXO3/JMJD4/EIF6/EIF3B/IGF2BP3/MTG2/NCK2/EIF2AK1/CPEB2/CCL5/METTL14/NANOS1/ROCK2/RARA	54
GO:0006401	RNA catabolic process	0.00797888	HNRNPC/POP1/EXOSC2/FEN1/NCBP1/SUPV3L1/DNA2/PDE12/SYNCRIP/DHX9/CNOT10/PPP1R8/PSMA2/ANP32A/PSMA4/PSMA3/RNASEH2A/NAF1/SIDT2/CIRBP/PSMB7/FASTKD1/PSMC1/NOCT/KHSRP/PSMD3/MOV10/HNRNPR/ZPR1/RNASE6/PSMD4/CNOT8/PSMA7/PSMF1/CNOT11/RPS6/PPP2CA/IGF2BP3/E2F1/HNRNPA0/SND1/RPS29/OAS2/PSMB10/RPS28/RPL36/METTL14/NANOS1/ROCK2/DCP2	50
GO:0006403	RNA localization	0.000450111	NUP37/RAN/NUP205/NDC1/NUP58/NCBP1/NUP35/CPSF2/NUP85/EIF5A/SDAD1/ALYREF/DHX9/NHP2/SLBP/TGFBR2/SRSF6/NAF1/CCT8/SIDT2/SRSF1/FIP1L1/NUP50/XPO5/CCT2/NUP107/KHSRP/NUP54/RIOK2/WRAP53/NXT1/RAE1/CPSF4/PHAX/IGF2BP3/FLOT1/DCP2	37
GO:0009451	RNA modification	0.0177033	GAR1/TGS1/TRUB1/WDR4/TRMT10C/QTRT2/NHP2/PUS7/TRMT1/NAF1/ZCCHC4/ADAT2/NSUN4/TRMT6/CDK5RAP1/METTL1/MOCS3/ANKRD16/TRMT61A/HSD17B10/METTL14	21
GO:0008380	RNA splicing	0.00983636	HNRNPC/SNRPF/PRMT5/TGS1/NCBP1/TTF2/PRPF40A/C1QBP/CPSF2/GEMIN4/GEMIN5/GEMIN2/PTBP3/SYNCRIP/GCFC2/ALYREF/DHX9/SNRNP40/PPP1R8/TRA2B/HNRNPL/TXNL4A/SNW1/PHF5A/HNRNPF/SNRPA/PPIH/SRSF6/SRSF1/FIP1L1/SNRPB/SMN2/DHX15/TSEN2/CELF2/KHSRP/HNRNPR/PNN/WDR77/ZPR1/CSTF1/CDK12/TSEN54/DHX16/CPSF4/SNRPB2/FAM172A/PPP2CA/CWC27/HNRNPA0/PSIP1/SREK1/CLK4/CTNNBL1/METTL14/PPIL3/SREK1IP1	57
GO:0000375	RNA splicing, via transesterification reactions	0.0115784	HNRNPC/SNRPF/PRMT5/TGS1/NCBP1/PRPF40A/C1QBP/CPSF2/GEMIN4/GEMIN5/GEMIN2/SYNCRIP/GCFC2/ALYREF/DHX9/SNRNP40/TRA2B/HNRNPL/TXNL4A/SNW1/PHF5A/HNRNPF/SNRPA/PPIH/SRSF6/SRSF1/FIP1L1/SNRPB/SMN2/DHX15/CELF2/KHSRP/HNRNPR/PNN/WDR77/CSTF1/DHX16/CPSF4/SNRPB2/FAM172A/CWC27/HNRNPA0/PSIP1/SREK1/CTNNBL1/METTL14/PPIL3	47
GO:0050658	RNA transport	0.00198814	NUP37/RAN/NUP205/NDC1/NUP58/NCBP1/NUP35/CPSF2/NUP85/EIF5A/SDAD1/ALYREF/DHX9/SLBP/TGFBR2/SRSF6/SIDT2/SRSF1/FIP1L1/NUP50/XPO5/NUP107/KHSRP/NUP54/RIOK2/NXT1/RAE1/CPSF4/PHAX/IGF2BP3/FLOT1	31
GO:0042110	T cell activation	0.00696822	STOML2/FANCD2/GLMN/PAWR/MYB/PTPN11/TGFBR2/FANCA/ZMIZ1/RC3H2/RIPK2/NCAPH2/BCL2/XBP1/RAB27A/LY9/CBFB/NCKAP1L/CYLD/DOCK2/SASH3/FGL2/IL6ST/AIF1/FCGR2B/GPR18/NLRC3/ITK/CD3D/DDOST/DOCK8/CD2/RPS6/RHOH/MAFB/BTLA/TESPA1/ITGAL/IDO1/HLA-DPB1/PTGER4/GPNMB/EOMES/ITCH/P2RX7/CD274/FZD5/PSMB10/CD160/RASGRP1/NCK2/THEMIS/LCK/CCL5/PTPRC/CD8A/IRF1/RARA	58
GO:0030217	T cell differentiation	0.0484407	FANCD2/MYB/TGFBR2/FANCA/ZMIZ1/RC3H2/RIPK2/NCAPH2/BCL2/XBP1/LY9/CBFB/NCKAP1L/CYLD/DOCK2/SASH3/GPR18/CD3D/CD2/RPS6/RHOH/MAFB/TESPA1/PTGER4/EOMES/FZD5/RASGRP1/THEMIS/LCK/PTPRC/IRF1/RARA	32
GO:0050852	T cell receptor signaling pathway	0.000705499	STOML2/PAWR/UBE2N/PSMA2/PSMA4/PSMA3/CHUK/RC3H2/PSMB7/RIPK2/RNF31/PSMC1/PSMD3/PIK3CB/CYLD/TRBC1/PSMD4/PSMA7/PVRIG/ITK/PSMF1/CD3D/TRAC/TESPA1/HLA-DPB1/TRAT1/HLA-DRB1/PSMB10/CD160/THEMIS/LCK/PTPRC/NECTIN2	33
GO:0006400	tRNA modification	0.0270683	WDR4/TRMT10C/QTRT2/PUS7/TRMT1/ADAT2/TRMT6/CDK5RAP1/METTL1/MOCS3/ANKRD16/TRMT61A/HSD17B10	13
GO:0006260	DNA replication	8.06558e-13	ESCO2/MCM4/STOML2/CACYBP/CCNE2/PRIM2/POLE3/DTL/RAD51/CDK1/CCNA2/EXO1/FEN1/TIPIN/GEN1/ORC1/SUPT16H/BRIP1/RRM1/CHAF1A/RFC5/CHEK1/E2F7/GINS3/CHAF1B/GINS4/MCM6/CDT1/CLSPN/DNA2/PDS5A/FBXO5/POLE2/NBN/MCMBP/CDC7/RMI1/ALYREF/DONSON/DHX9/FANCM/RRM2/TTF1/GINS2/SLBP/RNASEH2A/MCM5/POLB/ACVRL1/E2F8/FGFR1/WAPL/MCM8/NASP/BAZ1A/ZPR1/DNAJC2/EHMT2/CCNE1/NFIC/PPP2CA/ATG7/MAP2K4/RAD50	64
GO:0140053	mitochondrial gene expression	1.84418e-09	MRPL42/MRPL15/C1QBP/MRPS2/SUPV3L1/MRRF/MTIF2/RMND1/YARS2/MRPL44/MRPS22/MRPL50/MRPL4/MRPL32/TRMT10C/SHMT2/MRPL3/MRPL16/GFM1/MRPS30/TRNT1/EARS2/FASTKD5/TSFM/MRPS16/MRPL11/MRPS26/SLC25A33/NSUN4/MRPS36/MRPL46/FASTKD2/CDK5RAP1/MRPL14/POLRMT/FOXO3/AARS2/MRPL54/MTG2/HSD17B10/MRPL34	41
GO:0032543	mitochondrial translation	1.85262e-07	MRPL42/MRPL15/C1QBP/MRPS2/MRRF/MTIF2/RMND1/YARS2/MRPL44/MRPS22/MRPL50/MRPL4/MRPL32/TRMT10C/SHMT2/MRPL3/MRPL16/GFM1/MRPS30/EARS2/TSFM/MRPS16/MRPL11/MRPS26/NSUN4/MRPS36/MRPL46/FASTKD2/CDK5RAP1/MRPL14/AARS2/MRPL54/MTG2/MRPL34	34
GO:0034660	ncRNA metabolic process	1.85262e-07	UTP15/NOLC1/WDR43/MARS2/POP1/RAN/EXOSC2/PA2G4/GAR1/WDR75/NCBP1/NPM3/DDX21/IARS/BMS1/TEX10/WDR4/TAF5/GEMIN4/YARS2/EEF1E1/NOP14/FARSA/INTS2/IARS2/GRSF1/TRMT10C/QTRT2/FCF1/NHP2/NOB1/PUS7/RPAP2/EPRS/TRNT1/LARS2/EARS2/TRMT1/NAF1/ZCCHC4/RC3H2/ADAT2/KARS/CCNT1/DTD2/TSEN2/XPO5/WDR18/POLR3K/KHSRP/PWP1/CARS/NSUN4/TRMT6/ISG20L2/RIOK2/PPA1/CDK5RAP1/TSEN54/CPSF4/POU2F1/INTS6/NSA2/RRP36/RPRD1B/METTL1/RPS6/SNAP…	79
GO:0006261	DNA-dependent DNA replication	3.68989e-07	MCM4/STOML2/CCNE2/PRIM2/POLE3/RAD51/FEN1/TIPIN/GEN1/RFC5/E2F7/GINS3/GINS4/MCM6/CDT1/DNA2/FBXO5/POLE2/NBN/MCMBP/CDC7/ALYREF/DONSON/FANCM/GINS2/SLBP/MCM5/POLB/E2F8/FGFR1/BAZ1A/ZPR1/CCNE1/ATG7	34
GO:0140014	mitotic nuclear division	3.92025e-07	SMC2/RAN/CCNB1/PRMT5/MAD2L1/RAD21/GEN1/BUB1B/CDC23/KIF18A/BUB3/NUSAP1/CHEK1/NCAPG/MKI67/CDC25C/NAA50/CENPE/ANLN/KIF11/CDT1/KIF22/NDC80/DLGAP5/SMC4/TPX2/PDS5A/FBXO5/BCCIP/KIF20B/INCENP/KNTC1/ZWINT/KIF2A/MAP9/SMC5/AURKA/UBE2C/NCAPH2/PHIP/CEP192/KLHDC8B/MYBL2/RIOK2/CHMP2B/CHMP7/NSFL1C/CUL7/RAB11A	49
GO:0000280	nuclear division	6.60762e-06	SMC2/RAN/CCNB1/FANCD2/PRMT5/MAD2L1/NDC1/RAD21/GEN1/BUB1B/CDC23/KIF18A/BRIP1/BUB3/CKS2/NUSAP1/CHEK1/NCAPG/MKI67/CDC25C/NAA50/CENPE/ANLN/KIF11/CDT1/KIF22/NDC80/DLGAP5/SMC4/TPX2/PDS5A/FBXO5/BCCIP/KIF20B/INCENP/KNTC1/ZWINT/PSMC3IP/FANCM/KIF2A/MAP9/SMC5/AURKA/FANCA/UBE2C/NCAPH2/PHIP/CEP192/HSPA2/KLHDC8B/MYBL2/RIOK2/CHMP2B/CDC25B/CHMP7/SYCP2/NSFL1C/CUL7/RAB11A/RAD50/BAG6	61
GO:0007059	chromosome segregation	6.60762e-06	SMC2/CDCA2/NUP37/KNL1/RAN/CCNB1/FANCD2/RAD18/MAD2L1/NDC1/SKA1/RAD21/FEN1/GEN1/BUB1B/CDC23/KIF18A/BRIP1/BUB3/NUSAP1/NCAPG/MKI67/NAA50/CENPE/CDT1/KIF22/NDC80/DLGAP5/SMC4/PDS5A/FBXO5/NTMT1/ECT2/MCMBP/INCENP/ZWINT/FANCM/SMC5/NCAPH2/GEM/KLHDC8B/WAPL/CIAO1/RIOK2/CHMP2B/CSNK2A1/CHMP7/SYCP2/RAB11A/BAG6/TTL	51
GO:0048285	organelle fission	8.49654e-06	SMC2/RAN/CCNB1/FANCD2/PRMT5/MAD2L1/MTFR2/NDC1/RAD21/GEN1/BUB1B/CDC23/KIF18A/BRIP1/BUB3/CKS2/NUSAP1/CHEK1/NCAPG/MKI67/CDC25C/NAA50/CENPE/ANLN/KIF11/CDT1/KIF22/NDC80/DLGAP5/SMC4/TPX2/PDS5A/FBXO5/BCCIP/KIF20B/INCENP/KNTC1/ZWINT/PSMC3IP/FANCM/MTFP1/KIF2A/MAP9/SMC5/AURKA/FANCA/UBE2C/NCAPH2/PHIP/CEP192/HSPA2/KLHDC8B/MYBL2/RIOK2/CHMP2B/TMEM135/LRRK2/CDC25B/CHMP7/SYCP2/NSFL1C/CUL7/RAB11A/RAD50/BAG6	65
GO:0098813	nuclear chromosome segregation	1.47198e-05	SMC2/KNL1/RAN/CCNB1/FANCD2/MAD2L1/NDC1/RAD21/FEN1/GEN1/BUB1B/CDC23/KIF18A/BRIP1/BUB3/NUSAP1/NCAPG/NAA50/CENPE/CDT1/KIF22/NDC80/DLGAP5/SMC4/PDS5A/FBXO5/ECT2/MCMBP/INCENP/ZWINT/FANCM/SMC5/NCAPH2/GEM/KLHDC8B/WAPL/RIOK2/CHMP2B/CHMP7/SYCP2/RAB11A/BAG6/TTL	43
GO:0006399	tRNA metabolic process	1.47198e-05	MARS2/POP1/IARS/WDR4/YARS2/EEF1E1/FARSA/IARS2/GRSF1/TRMT10C/QTRT2/PUS7/EPRS/TRNT1/LARS2/EARS2/TRMT1/ADAT2/KARS/DTD2/TSEN2/POLR3K/CARS/TRMT6/PPA1/CDK5RAP1/TSEN54/CPSF4/METTL1/AARS2/WARS/MOCS3/ANKRD16/TRMT61A/HSD17B10	35
GO:0007098	centrosome cycle	1.58895e-05	CDK1/GEN1/PLK4/HAUS6/CHEK1/CHORDC1/STIL/POC1A/KIF11/HAUS2/HAUS8/CEP152/HAUS3/MAP9/AURKA/CEP295/SSX2IP/CEP68/KAT2B/CEP192/CHMP2B/CETN3/PCM1/CEP120/NUBP1/NSFL1C/PPP1R12A/ROCK2	28
GO:0034470	ncRNA processing	3.46537e-05	UTP15/NOLC1/WDR43/POP1/EXOSC2/PA2G4/GAR1/WDR75/NPM3/DDX21/BMS1/TEX10/WDR4/GEMIN4/NOP14/INTS2/GRSF1/TRMT10C/QTRT2/FCF1/NHP2/NOB1/PUS7/TRNT1/TRMT1/NAF1/ZCCHC4/ADAT2/KARS/TSEN2/WDR18/POLR3K/NSUN4/TRMT6/ISG20L2/RIOK2/CDK5RAP1/TSEN54/CPSF4/INTS6/NSA2/RRP36/METTL1/RPS6/MOCS3/ANKRD16/INTS9/TRMT61A/SMAD2/HSD17B10/RPS28	51
GO:0000086	G2/M transition of mitotic cell cycle	4.17323e-05	CEP78/CCNB1/DTL/RAD21/CDK1/CCNA2/PLK4/MELK/HAUS6/CDC25C/CLSPN/HAUS2/HAUS8/TPX2/FBXO5/CEP152/NBN/HSP90AA1/CDC7/HMMR/DONSON/HAUS3/PSMA2/PSMA4/PSMA3/AURKA/PSMB7/SMARCD3/PSMC1/CEP192/PSMD3/HSPA2/AJUBA/PSMD4/PCM1/PSMA7/CCNH/PSMF1/CDC25B/NINL/PPP1R12B/PSMB10/RAB11A/PPP1R12A	44
GO:0000959	mitochondrial RNA metabolic process	4.17323e-05	SUPV3L1/PDE12/YARS2/TRMT10C/TRNT1/EARS2/FASTKD5/FASTKD1/SLC25A33/CDK5RAP1/POLRMT/FOXO3/AARS2/HSD17B10	14
GO:0051169	nuclear transport	4.19507e-05	NOLC1/NUP37/SNRPF/RAN/NUP205/NDC1/NUP58/NCBP1/NUP35/CPSF2/PKIG/GEMIN4/GEMIN5/NUP85/EIF5A/GEMIN2/ECT2/ANP32B/SDAD1/ALYREF/DHX9/ANP32A/ATXN1/SLBP/PTPN11/SRSF6/SRSF1/FIP1L1/UHMK1/SNRPB/NUP50/MDFIC/SMN2/XPO5/AGT/NUP107/NUP54/RIOK2/NXT1/ZPR1/MMP12/TXNIP/LRRK2/RAE1/CPSF4/JUP/PHAX/MED1/RAB23/PSIP1/PPP1R12A/STRADB	52
GO:0006913	nucleocytoplasmic transport	7.07737e-05	NOLC1/NUP37/SNRPF/RAN/NUP205/NDC1/NUP58/NCBP1/NUP35/CPSF2/PKIG/GEMIN4/GEMIN5/NUP85/EIF5A/GEMIN2/ECT2/ANP32B/SDAD1/ALYREF/DHX9/ANP32A/ATXN1/SLBP/PTPN11/SRSF6/SRSF1/FIP1L1/UHMK1/SNRPB/NUP50/MDFIC/SMN2/XPO5/AGT/NUP107/NUP54/RIOK2/NXT1/ZPR1/MMP12/TXNIP/LRRK2/RAE1/CPSF4/JUP/PHAX/MED1/RAB23/PPP1R12A/STRADB	51
GO:0031023	microtubule organizing center organization	7.40998e-05	CDK1/GEN1/PLK4/HAUS6/CHEK1/CHORDC1/STIL/POC1A/KIF11/HAUS2/HAUS8/CEP152/HAUS3/MAP9/AURKA/CEP295/SSX2IP/CEP68/KAT2B/CEP192/CHMP2B/CETN3/PCM1/CEP120/NUBP1/NSFL1C/PPP1R12A/ROCK2	28
GO:0006275	regulation of DNA replication	8.07293e-05	ESCO2/STOML2/CACYBP/CDK1/CCNA2/TIPIN/RFC5/E2F7/CDT1/DNA2/PDS5A/FBXO5/NBN/CDC7/DONSON/DHX9/TTF1/ACVRL1/E2F8/FGFR1/WAPL/EHMT2/PPP2CA/ATG7/MAP2K4	25
GO:0044839	cell cycle G2/M phase transition	9.99933e-05	CEP78/CCNB1/DTL/RAD21/CDK1/CCNA2/PLK4/MELK/HAUS6/CHEK1/CDC25C/CLSPN/HAUS2/HAUS8/TPX2/FBXO5/CEP152/NBN/HSP90AA1/CDC7/HMMR/DONSON/HAUS3/PSMA2/PSMA4/PSMA3/AURKA/PSMB7/SMARCD3/PSMC1/CEP192/PSMD3/HSPA2/AJUBA/PSMD4/PCM1/PSMA7/CCNH/PSMF1/CDC25B/NINL/PPP1R12B/PSMB10/RAB11A/PPP1R12A	45
GO:0000070	mitotic sister chromatid segregation	9.99933e-05	SMC2/RAN/CCNB1/MAD2L1/RAD21/GEN1/BUB1B/CDC23/KIF18A/BUB3/NUSAP1/NCAPG/NAA50/CENPE/CDT1/KIF22/NDC80/DLGAP5/SMC4/PDS5A/FBXO5/INCENP/ZWINT/SMC5/NCAPH2/RIOK2/CHMP2B/CHMP7/RAB11A	29
GO:0010389	regulation of G2/M transition of mitotic cell cycle	9.99946e-05	CEP78/CCNB1/DTL/RAD21/CDK1/PLK4/HAUS6/CLSPN/HAUS2/HAUS8/TPX2/FBXO5/CEP152/NBN/HSP90AA1/CDC7/HMMR/DONSON/HAUS3/PSMA2/PSMA4/PSMA3/AURKA/PSMB7/SMARCD3/PSMC1/CEP192/PSMD3/HSPA2/PSMD4/PCM1/PSMA7/PSMF1/NINL/PSMB10/RAB11A	36
GO:0022613	ribonucleoprotein complex biogenesis	0.000124864	UTP15/NOLC1/WDR43/SNRPF/RAN/EXOSC2/PRMT5/PA2G4/GAR1/WDR75/TGS1/NCBP1/C1QBP/NPM3/MRPS2/DDX21/BMS1/TEX10/GEMIN4/GEMIN5/GEMIN2/NOP2/HSP90AA1/GCFC2/SDAD1/NOP14/DHX9/FCF1/NHP2/NOB1/TXNL4A/RRN3/SRSF6/NAF1/SRSF1/ZCCHC4/CIRBP/SNRPB/SMN2/WDR18/NOCT/CELF2/PWP1/NSUN4/NUFIP1/DHX30/ISG20L2/RIOK2/FASTKD2/WDR77/NSA2/RRP36/GRB7/RPS6/EIF6/EIF3B/PSIP1/MTG2/RPS28	59
GO:0045787	positive regulation of cell cycle	0.000129966	CCNB1/MAD2L1/EZH2/DTL/RAD21/CDK1/FEN1/GEN1/PLK4/CKS2/NUSAP1/CHEK1/E2F7/POC1A/CDC25C/CDT1/NDC80/DLGAP5/FBXO5/ECT2/KIF20B/CDC7/CNOT10/CSPP1/SMC5/AURKA/PTPN11/CEP295/CCNT1/SMARCD3/UBE2C/PHIP/PGGT1B/E2F8/HSPA2/FGFR1/TAL1/GPER1/EVI2B/CNOT8/PRKCE/AIF1/CCNE1/CEP120/CDC25B/POLDIP2/CNOT11/MED1/E2F1/MLXIPL/FLT3LG/NSFL1C/RAB11A/RBL2/ROCK2/TTL/HMGN5/RARA	58
GO:0000819	sister chromatid segregation	0.000131105	SMC2/RAN/CCNB1/MAD2L1/RAD21/FEN1/GEN1/BUB1B/CDC23/KIF18A/BUB3/NUSAP1/NCAPG/NAA50/CENPE/CDT1/KIF22/NDC80/DLGAP5/SMC4/PDS5A/FBXO5/MCMBP/INCENP/ZWINT/SMC5/NCAPH2/WAPL/RIOK2/CHMP2B/CHMP7/RAB11A	32
GO:0009141	nucleoside triphosphate metabolic process	0.000256517	NUP37/STOML2/RAN/CCNB1/NUP205/NDC1/NUP58/CDK1/NUP35/AK2/PDE12/NUP85/CYC1/FXN/TYMS/ENO1/SHMT2/COX15/DCTPP1/GAPDH/FAM20C/MOCOS/NDUFA10/NUP50/GIMAP7/ADK/COX5A/NUP107/SLC25A33/GNAI3/NUP54/NDUFAB1/ISCU/NFS1/ENO3/UCKL1/LRRK2/RAE1/ITPA/UQCRQ/EIF6/MOCS3/FOXK2/RAB23/DNAJC30/MLXIPL/NDUFS7/CTPS2/P2RX7/CMPK2/UQCR11/FOXK1/NCOR1	53
GO:0042254	ribosome biogenesis	0.000258508	UTP15/NOLC1/WDR43/RAN/EXOSC2/PA2G4/GAR1/WDR75/C1QBP/NPM3/MRPS2/DDX21/BMS1/TEX10/GEMIN4/NOP2/SDAD1/NOP14/FCF1/NHP2/NOB1/RRN3/NAF1/ZCCHC4/WDR18/PWP1/NSUN4/DHX30/ISG20L2/RIOK2/FASTKD2/NSA2/RRP36/RPS6/EIF6/MTG2/RPS28	37
GO:1902749	regulation of cell cycle G2/M phase transition	0.000258508	CEP78/CCNB1/DTL/RAD21/CDK1/PLK4/HAUS6/CHEK1/CLSPN/HAUS2/HAUS8/TPX2/FBXO5/CEP152/NBN/HSP90AA1/CDC7/HMMR/DONSON/HAUS3/PSMA2/PSMA4/PSMA3/AURKA/PSMB7/SMARCD3/PSMC1/CEP192/PSMD3/HSPA2/PSMD4/PCM1/PSMA7/PSMF1/NINL/PSMB10/RAB11A	37
GO:0006418	tRNA aminoacylation for protein translation	0.000432148	MARS2/IARS/YARS2/EEF1E1/FARSA/IARS2/EPRS/LARS2/EARS2/KARS/CARS/PPA1/AARS2/WARS	14
GO:0046605	regulation of centrosome cycle	0.000450111	GEN1/PLK4/CHEK1/CHORDC1/STIL/POC1A/KIF11/MAP9/AURKA/CEP295/KAT2B/CHMP2B/CEP120/NUBP1/NSFL1C/ROCK2	16
GO:0006415	translational termination	0.000450111	MRPL42/MRPL15/MRPS2/MRRF/EIF5A/MRPL44/MRPS22/MRPL50/MRPL4/MRPL32/MRPL3/MRPL16/MRPS30/C12orf65/MRPS16/MRPL11/MRPS26/MRPS36/MRPL46/MRPL14/JMJD4/MRPL54/MRPL34	23
GO:1901990	regulation of mitotic cell cycle phase transition	0.000450111	CEP78/CCNB1/MAD2L1/EZH2/DTL/RAD21/CDK1/GEN1/PLK4/BUB1B/CDC23/BUB3/HAUS6/E2F7/CDC25C/CENPE/ANLN/CDT1/NDC80/CLSPN/HAUS2/DLGAP5/HAUS8/TPX2/FBXO5/CEP152/NBN/HSP90AA1/CDC7/KNTC1/HMMR/DONSON/HAUS3/CNOT10/PSMA2/PSMA4/PSMA3/AURKA/PSMB7/SMARCD3/UBE2C/PSMC1/CEP192/PSMD3/E2F8/HSPA2/BCL2/RIOK2/PSMD4/CNOT8/PCM1/PSMA7/AIF1/CCNE1/PSMF1/CNOT11/NINL/E2F1/GPNMB/PSMB10/RAB11A/RBL2	62
GO:0006405	RNA export from nucleus	0.000450111	NUP37/RAN/NUP205/NDC1/NUP58/NCBP1/NUP35/CPSF2/NUP85/EIF5A/SDAD1/ALYREF/DHX9/SLBP/SRSF6/SRSF1/FIP1L1/NUP50/XPO5/NUP107/NUP54/RIOK2/NXT1/RAE1/CPSF4/PHAX	26
GO:0031145	anaphase-promoting complex-dependent catabolic process	0.000571383	CCNB1/MAD2L1/CDK1/BUB1B/CDC23/BUB3/FBXO5/PTTG1/PSMA2/PSMA4/PSMA3/AURKA/PSMB7/UBE2C/PSMC1/PSMD3/PSMD4/PSMA7/PSMF1/PSMB10	20
GO:0006414	translational elongation	0.000585016	MRPL42/MRPL15/MRPS2/EIF5A/MRPL44/MRPS22/MRPL50/MRPL4/MRPL32/TUFM/MRPL3/MRPL16/GFM1/MRPS30/TSFM/MRPS16/MRPL11/MRPS26/DPH5/MRPS36/MRPL46/MRPL14/MRPL54/EEF1A1/MRPL34/CPEB2	26
GO:0044786	cell cycle DNA replication	0.000806994	PRIM2/POLE3/RAD51/FEN1/TIPIN/RFC5/E2F7/CDT1/DNA2/FBXO5/POLE2/CDC7/SLBP/E2F8/FGFR1/ZPR1	16
GO:0043039	tRNA aminoacylation	0.000806994	MARS2/IARS/YARS2/EEF1E1/FARSA/IARS2/EPRS/LARS2/EARS2/KARS/CARS/PPA1/AARS2/WARS	14
GO:0009199	ribonucleoside triphosphate metabolic process	0.000806994	NUP37/STOML2/RAN/CCNB1/NUP205/NDC1/NUP58/CDK1/NUP35/AK2/PDE12/NUP85/CYC1/FXN/ENO1/SHMT2/COX15/GAPDH/FAM20C/MOCOS/NDUFA10/NUP50/GIMAP7/COX5A/NUP107/SLC25A33/GNAI3/NUP54/NDUFAB1/ISCU/NFS1/ENO3/UCKL1/LRRK2/RAE1/ITPA/UQCRQ/EIF6/MOCS3/FOXK2/RAB23/DNAJC30/MLXIPL/NDUFS7/CTPS2/P2RX7/UQCR11/FOXK1/NCOR1	49
GO:0007088	regulation of mitotic nuclear division	0.000806994	CCNB1/PRMT5/MAD2L1/RAD21/GEN1/BUB1B/CDC23/NUSAP1/CHEK1/MKI67/CDC25C/CENPE/ANLN/KIF11/CDT1/NDC80/DLGAP5/FBXO5/KIF20B/KNTC1/MAP9/SMC5/AURKA/UBE2C/PHIP/RIOK2/CHMP2B/NSFL1C/CUL7	29
GO:0000226	microtubule cytoskeleton organization	0.000968436	RAN/CCNB1/FKBP4/MAD2L1/SKA1/CDK1/GEN1/PLK4/KIF18A/TUBGCP4/HAUS6/NUSAP1/CHEK1/CHORDC1/STIL/POC1A/CENPE/KIF20A/KIF11/NDC80/FOPNL/HAUS2/HAUS8/TPX2/FBXO5/CEP152/BCCIP/NTMT1/SUN2/HAUS3/KIF2A/MAP9/AURKA/GAPDH/CEP295/SPAG16/SSX2IP/FGF13/CEP68/MAP2/KAT2B/CAMSAP1/CEP192/MYBL2/ZPR1/CHMP2B/CYLD/CETN3/PCM1/RAE1/CEP120/NUBP1/PARP3/TRIM36/MARK1/NSFL1C/CUL7/RAB11A/PPP1R12A/RASSF7/SLK/NCOR1/ROCK2/TTL	64
GO:0043038	amino acid activation	0.000988181	MARS2/IARS/YARS2/EEF1E1/FARSA/IARS2/EPRS/LARS2/EARS2/KARS/CARS/PPA1/AARS2/WARS	14
GO:0071103	DNA conformation change	0.00111397	SETSIP/SMC2/MCM4/KNL1/CCNB1/RAD51/CDK1/BRIP1/CHAF1A/SUPV3L1/NUSAP1/NCAPG/MIS18A/CHAF1B/CENPH/GINS4/MCM6/DNA2/SMC4/HIST1H1E/HELLS/NBN/ASF1B/ANP32B/CENPM/DHX9/HMGB2/FANCM/GINS2/ASCC3/TSPYL5/HAT1/ITGB3BP/SMARCA1/NCAPH2/CHD1/DHX30/NASP/TSPYL4/GPER1/TSPY26P/TOP1/KAT6B/RAD50	44
GO:0070125	mitochondrial translational elongation	0.00118682	MRPL42/MRPL15/MRPS2/MRPL44/MRPS22/MRPL50/MRPL4/MRPL32/MRPL3/MRPL16/GFM1/MRPS30/MRPS16/MRPL11/MRPS26/MRPS36/MRPL46/MRPL14/MRPL54/MRPL34	20
GO:0022616	DNA strand elongation	0.00129833	FEN1/DCLRE1B/GINS3/GINS4/DNA2/NBN/GINS2/RAD50	8
GO:0007051	spindle organization	0.00135812	RAN/CCNB1/HAUS6/STIL/POC1A/CENPE/KIF11/NDC80/HAUS2/HAUS8/TPX2/FBXO5/BCCIP/NTMT1/SUN2/HAUS3/KIF2A/MAP9/AURKA/CEP192/MYBL2/CHMP2B/RAE1/CEP120/PARP3/TRIM36/RAB11A/NCOR1	28
GO:0097064	ncRNA export from nucleus	0.00139121	NUP37/RAN/NUP205/NDC1/NUP58/NUP35/NUP85/NUP50/NUP107/NUP54/RAE1/PHAX	12
GO:0090068	positive regulation of cell cycle process	0.00144659	CCNB1/MAD2L1/EZH2/DTL/RAD21/CDK1/FEN1/GEN1/PLK4/NUSAP1/E2F7/POC1A/CDC25C/CDT1/NDC80/DLGAP5/FBXO5/ECT2/KIF20B/CDC7/CNOT10/CSPP1/SMC5/AURKA/CEP295/SMARCD3/UBE2C/PHIP/E2F8/HSPA2/FGFR1/CNOT8/PRKCE/AIF1/CCNE1/CEP120/CDC25B/CNOT11/MED1/E2F1/NSFL1C/RAB11A/RBL2/ROCK2	44
GO:1903311	regulation of mRNA metabolic process	0.0015132	HNRNPC/CCNB1/EXOSC2/NCBP1/C1QBP/PDE12/SYNCRIP/DHX9/PSMA2/TRA2B/ANP32A/HNRNPL/SNW1/PSMA4/PSMA3/SNRPA/SRSF6/CIRBP/CCNT1/PSMB7/FASTKD1/PSMC1/NOCT/KHSRP/PSMD3/MOV10/HNRNPR/LEO1/PSMD4/CNOT8/PSMA7/CPSF4/PSMF1/FAM172A/IGF2BP3/E2F1/HNRNPA0/SREK1/PSMB10/METTL14/NANOS1/ROCK2/DCP2	43
GO:0070126	mitochondrial translational termination	0.0015132	MRPL42/MRPL15/MRPS2/MRRF/MRPL44/MRPS22/MRPL50/MRPL4/MRPL32/MRPL3/MRPL16/MRPS30/MRPS16/MRPL11/MRPS26/MRPS36/MRPL46/MRPL14/MRPL54/MRPL34	20
GO:0009144	purine nucleoside triphosphate metabolic process	0.0016329	NUP37/STOML2/RAN/CCNB1/NUP205/NDC1/NUP58/CDK1/NUP35/AK2/PDE12/NUP85/CYC1/FXN/ENO1/SHMT2/COX15/GAPDH/FAM20C/MOCOS/NDUFA10/NUP50/GIMAP7/ADK/COX5A/NUP107/SLC25A33/GNAI3/NUP54/NDUFAB1/ISCU/NFS1/ENO3/LRRK2/RAE1/ITPA/UQCRQ/EIF6/MOCS3/FOXK2/RAB23/DNAJC30/MLXIPL/NDUFS7/P2RX7/UQCR11/FOXK1/NCOR1	48
GO:0009205	purine ribonucleoside triphosphate metabolic process	0.00190589	NUP37/STOML2/RAN/CCNB1/NUP205/NDC1/NUP58/CDK1/NUP35/AK2/PDE12/NUP85/CYC1/FXN/ENO1/SHMT2/COX15/GAPDH/FAM20C/MOCOS/NDUFA10/NUP50/GIMAP7/COX5A/NUP107/SLC25A33/GNAI3/NUP54/NDUFAB1/ISCU/NFS1/ENO3/LRRK2/RAE1/ITPA/UQCRQ/EIF6/MOCS3/FOXK2/RAB23/DNAJC30/MLXIPL/NDUFS7/P2RX7/UQCR11/FOXK1/NCOR1	47
GO:1901987	regulation of cell cycle phase transition	0.00192753	CEP78/CCNB1/MAD2L1/EZH2/DTL/RAD21/CDK1/GEN1/PLK4/BUB1B/CDC23/BUB3/HAUS6/CHEK1/E2F7/CDC25C/CENPE/ANLN/CDT1/NDC80/CLSPN/HAUS2/DLGAP5/HAUS8/TPX2/FBXO5/CEP152/NBN/HSP90AA1/CDC7/KNTC1/HMMR/DONSON/HAUS3/CNOT10/PSMA2/PSMA4/PSMA3/AURKA/PSMB7/SMARCD3/UBE2C/PSMC1/CEP192/PSMD3/E2F8/HSPA2/BCL2/RIOK2/PSMD4/CNOT8/PCM1/PSMA7/AIF1/CCNE1/PSMF1/CNOT11/NINL/E2F1/GPNMB/PSMB10/RAB11A/RBL2	63
GO:0000281	mitotic cytokinesis	0.00198761	NUSAP1/KIF20A/ANLN/CEP55/ECT2/KIF20B/INCENP/MAP9/RAB35/KLHDC8B/CHMP2B/TTC19/SNX18/CHMP7/BIN3/TRIM36/CUL7	17
GO:0050657	nucleic acid transport	0.00198814	NUP37/RAN/NUP205/NDC1/NUP58/NCBP1/NUP35/CPSF2/NUP85/EIF5A/SDAD1/ALYREF/DHX9/SLBP/TGFBR2/SRSF6/SIDT2/SRSF1/FIP1L1/NUP50/XPO5/NUP107/KHSRP/NUP54/RIOK2/NXT1/RAE1/CPSF4/PHAX/IGF2BP3/FLOT1	31
GO:0051168	nuclear export	0.00198814	NUP37/RAN/NUP205/NDC1/NUP58/NCBP1/NUP35/CPSF2/NUP85/EIF5A/ANP32B/SDAD1/ALYREF/DHX9/ATXN1/SLBP/PTPN11/SRSF6/SRSF1/FIP1L1/UHMK1/NUP50/XPO5/NUP107/NUP54/RIOK2/NXT1/RAE1/CPSF4/PHAX/STRADB	31
GO:0015931	nucleobase-containing compound transport	0.0024882	NUP37/RAN/NUP205/NDC1/NUP58/NCBP1/NUP35/CPSF2/NUP85/EIF5A/SDAD1/ALYREF/DHX9/SLBP/TGFBR2/SRSF6/SIDT2/SRSF1/FIP1L1/NUP50/XPO5/NUP107/KHSRP/SLC25A33/NUP54/RIOK2/NXT1/RAE1/CPSF4/PHAX/SLC29A3/IGF2BP3/P2RX7/SLC35A4/SLC35E4/FLOT1	36
GO:0006409	tRNA export from nucleus	0.0024882	NUP37/RAN/NUP205/NDC1/NUP58/NUP35/NUP85/NUP50/NUP107/NUP54/RAE1	11
GO:0051031	tRNA transport	0.0024882	NUP37/RAN/NUP205/NDC1/NUP58/NUP35/NUP85/NUP50/NUP107/NUP54/RAE1	11
GO:0071431	tRNA-containing ribonucleoprotein complex export from nucleus	0.0024882	NUP37/RAN/NUP205/NDC1/NUP58/NUP35/NUP85/NUP50/NUP107/NUP54/RAE1	11
GO:0045931	positive regulation of mitotic cell cycle	0.0024882	CCNB1/MAD2L1/DTL/CDK1/GEN1/NUSAP1/CDT1/NDC80/DLGAP5/FBXO5/KIF20B/CDC7/SMC5/AURKA/PTPN11/SMARCD3/UBE2C/PHIP/HSPA2/FGFR1/TAL1/AIF1/CCNE1/CDC25B/POLDIP2/NSFL1C/RAB11A/TTL	28
GO:0051983	regulation of chromosome segregation	0.00273538	CCNB1/RAD18/MAD2L1/RAD21/FEN1/GEN1/BUB1B/CDC23/MKI67/CENPE/CDT1/NDC80/DLGAP5/FBXO5/ECT2/SMC5/WAPL/RIOK2/CSNK2A1/TTL	20
GO:0009123	nucleoside monophosphate metabolic process	0.00273538	NUP37/PAICS/STOML2/CCNB1/NUP205/NDC1/NUP58/CDK1/NUP35/GART/AK2/PDE12/PPAT/NUP85/CYC1/GMPS/FXN/TYMS/ENO1/SHMT2/COX15/GAPDH/FAM20C/TK1/NDUFA10/NUP50/ADK/COX5A/NUP107/SLC25A33/NUP54/NDUFAB1/ISCU/ENO3/UCKL1/RAE1/ADSL/UQCRQ/EIF6/FOXK2/DNAJC30/MLXIPL/NDUFS7/P2RX7/CMPK2/UQCR11/FOXK1/TK2/NCOR1/RAD50	50
GO:0071426	ribonucleoprotein complex export from nucleus	0.00285477	NUP37/RAN/NUP205/NDC1/NUP58/NCBP1/NUP35/CPSF2/NUP85/EIF5A/SDAD1/ALYREF/SLBP/SRSF6/SRSF1/FIP1L1/NUP50/NUP107/NUP54/RIOK2/NXT1/RAE1/CPSF4	23
GO:0046607	positive regulation of centrosome cycle	0.0030624	PLK4/POC1A/CEP295/CEP120/NSFL1C/ROCK2	6
GO:0071166	ribonucleoprotein complex localization	0.00319725	NUP37/RAN/NUP205/NDC1/NUP58/NCBP1/NUP35/CPSF2/NUP85/EIF5A/SDAD1/ALYREF/SLBP/SRSF6/SRSF1/FIP1L1/NUP50/NUP107/NUP54/RIOK2/NXT1/RAE1/CPSF4	23
GO:1903578	regulation of ATP metabolic process	0.00349154	NUP37/CCNB1/NUP205/NDC1/NUP58/CDK1/NUP35/PDE12/NUP85/ENO1/SHMT2/NUP50/NUP107/SLC25A33/NUP54/ISCU/RAE1/EIF6/DNAJC30/MLXIPL/P2RX7/NCOR1	22
GO:0000083	regulation of transcription involved in G1/S transition of mitotic cell cycle	0.00351425	DHFR/ORC1/E2F7/CDT1/FBXO5/TYMS/RRM2/ZPR1/CCNE1/E2F1	10
GO:0045740	positive regulation of DNA replication	0.00383747	STOML2/CACYBP/CDK1/E2F7/CDT1/DNA2/CDC7/DHX9/E2F8/FGFR1/MAP2K4	11
GO:0006270	DNA replication initiation	0.00469298	MCM4/CCNE2/PRIM2/POLE3/MCM6/CDT1/POLE2/NBN/MCM5/CCNE1	10
GO:0008033	tRNA processing	0.00469298	POP1/WDR4/GRSF1/TRMT10C/QTRT2/PUS7/TRNT1/TRMT1/ADAT2/KARS/TSEN2/POLR3K/TRMT6/CDK5RAP1/TSEN54/CPSF4/METTL1/MOCS3/ANKRD16/TRMT61A/HSD17B10	21
GO:0009124	nucleoside monophosphate biosynthetic process	0.00500958	NUP37/PAICS/STOML2/NUP205/NDC1/NUP58/NUP35/GART/AK2/PPAT/NUP85/GMPS/TYMS/ENO1/GAPDH/TK1/NUP50/ADK/NUP107/NUP54/ENO3/UCKL1/RAE1/ADSL/EIF6/FOXK2/DNAJC30/MLXIPL/P2RX7/FOXK1/TK2/NCOR1	32
GO:0070129	regulation of mitochondrial translation	0.00514387	C1QBP/RMND1/TRMT10C/SHMT2/TSFM/NSUN4/FASTKD2/CDK5RAP1/MTG2	9
GO:0006353	DNA-templated transcription, termination	0.00514387	SNRPF/PRMT5/NCBP1/TTF2/CPSF2/POLR1E/TWISTNB/DHX9/TTF1/SLBP/FIP1L1/SNRPB/SMN2/CSTF1/CCNH/CPSF4	16
GO:2000105	positive regulation of DNA-dependent DNA replication	0.00523535	STOML2/E2F7/CDT1/CDC7/E2F8/FGFR1	6
GO:0000075	cell cycle checkpoint	0.00527371	CCNB1/MAD2L1/DTL/CDK1/TIPIN/GEN1/BUB1B/ZWILCH/DCLRE1B/BRIP1/CHEK1/E2F7/CDC25C/CDT1/NDC80/CLSPN/DNA2/NBN/KNTC1/DONSON/ZWINT/CNOT10/AURKA/PTPN11/E2F8/MDC1/PEA15/CNOT8/CNOT11/RPS6/E2F1/RBL2	32
GO:0006611	protein export from nucleus	0.00527501	NUP37/RAN/NUP205/NDC1/NUP58/NCBP1/NUP35/CPSF2/NUP85/EIF5A/ANP32B/SDAD1/ALYREF/SLBP/PTPN11/SRSF6/SRSF1/FIP1L1/UHMK1/NUP50/XPO5/NUP107/NUP54/RIOK2/NXT1/RAE1/CPSF4/STRADB	28
GO:0051783	regulation of nuclear division	0.00554256	CCNB1/PRMT5/MAD2L1/RAD21/GEN1/BUB1B/CDC23/NUSAP1/CHEK1/MKI67/CDC25C/CENPE/ANLN/KIF11/CDT1/NDC80/DLGAP5/FBXO5/KIF20B/KNTC1/MAP9/SMC5/AURKA/UBE2C/PHIP/RIOK2/CHMP2B/NSFL1C/CUL7	29
GO:0007093	mitotic cell cycle checkpoint	0.00554256	CCNB1/MAD2L1/CDK1/TIPIN/GEN1/BUB1B/ZWILCH/DCLRE1B/E2F7/CDC25C/CDT1/NDC80/CLSPN/NBN/KNTC1/DONSON/ZWINT/CNOT10/AURKA/E2F8/MDC1/CNOT8/CNOT11/RPS6/E2F1/RBL2	26
GO:0072331	signal transduction by p53 class mediator	0.0075366	CCNB1/PRMT5/CDK1/EXO1/SUPT16H/BRIP1/RFC5/CHEK1/E2F7/CDC25C/TAF5/DNA2/TPX2/EEF1E1/NBN/NOP2/PMAIP1/RMI1/CNOT10/SNW1/AURKA/HINT1/RRN3/MTA2/E2F8/BCL2/PPP1R13L/CSNK2A1/CNOT8/EHMT2/CNOT11/FOXO3/PYHIN1/E2F1/SPRED2/RBL2/TAF4/RAD50/BAG6	39
GO:0071826	ribonucleoprotein complex subunit organization	0.00888575	SNRPF/PRMT5/TGS1/NCBP1/C1QBP/MRPS2/MRRF/GEMIN4/MTIF2/GEMIN5/GEMIN2/NOP2/HSP90AA1/GCFC2/DHX9/TXNL4A/SRSF6/NAF1/SRSF1/CIRBP/SNRPB/SMN2/NOCT/CELF2/NSUN4/NUFIP1/DHX30/FASTKD2/WDR77/GRB7/KIF5B/EIF6/EIF3B/PSIP1	34
GO:1905818	regulation of chromosome separation	0.00941512	CCNB1/MAD2L1/RAD21/GEN1/BUB1B/CDC23/CENPE/CDT1/NDC80/DLGAP5/FBXO5/RIOK2/CSNK2A1	13
GO:0070059	intrinsic apoptotic signaling pathway in response to endoplasmic reticulum stress	0.00963418	PMAIP1/ITPR1/TNFRSF10B/UBE2K/BAK1/ERO1A/BCL2/XBP1/SERINC3/LRRK2/GRINA/TRIB3/NCK2/BAG6	14
GO:1900542	regulation of purine nucleotide metabolic process	0.00983636	NUP37/CCNB1/NUP205/NDC1/NUP58/CDK1/NUP35/PDE12/NUP85/ENO1/SHMT2/NUP50/NUP107/SLC25A33/NUP54/ISCU/RAE1/EIF6/PDP1/DNAJC30/MLXIPL/P2RX7/NCOR1	23
GO:0070507	regulation of microtubule cytoskeleton organization	0.00983636	FKBP4/SKA1/GEN1/PLK4/KIF18A/CHEK1/CHORDC1/STIL/POC1A/KIF11/TPX2/MAP9/AURKA/CEP295/FGF13/MAP2/KAT2B/CAMSAP1/CHMP2B/CYLD/RAE1/CEP120/NUBP1/PARP3/TRIM36/NSFL1C/RASSF7/ROCK2	28
GO:0010948	negative regulation of cell cycle process	0.0101882	CCNB1/MAD2L1/EZH2/DTL/RAD21/RAD51/CDK1/GEN1/CHEK1/E2F7/CDC25C/CDT1/NDC80/CLSPN/FBXO5/NBN/CDC7/DONSON/RRM2/CNOT10/PSMA2/PSMA4/PSMA3/AURKA/PSMB7/KAT2B/PSMC1/L3MBTL2/PSMD3/E2F8/WAPL/BCL2/GPER1/EVI2B/PSMD4/CNOT8/PSMA7/EHMT2/PSMF1/NUBP1/CNOT11/E2F1/MLXIPL/GPNMB/PSMB10/RBL2/HMGN5	47
GO:0034248	regulation of cellular amide metabolic process	0.010524	NOLC1/DHFR/PA2G4/GUF1/NCBP1/C1QBP/ILF3/MTIF2/GEMIN5/TCOF1/EIF5A/RMND1/SYNCRIP/METAP1/TYMS/TRMT10C/DHX9/SHMT2/PUS7/EPRS/GAPDH/ZCCHC4/TSFM/CIRBP/UHMK1/TRAP1/KHSRP/MOV10/HNRNPR/NSUN4/DPH5/FASTKD2/LSM14B/CDK5RAP1/NOTCH4/EIF4E3/BANK1/CNOT11/GRB7/DHX29/FOXO3/JMJD4/EIF6/EIF3B/IGF2BP3/PDP1/EEF1A1/EFNA1/MTG2/GSAP/NCK2/EIF2AK1/CPEB2/CCL5/METTL14/NANOS1/ROCK2/RARA	58
GO:0006364	rRNA processing	0.010524	UTP15/NOLC1/WDR43/EXOSC2/PA2G4/GAR1/WDR75/NPM3/DDX21/BMS1/TEX10/GEMIN4/NOP14/FCF1/NHP2/NOB1/NAF1/ZCCHC4/WDR18/NSUN4/ISG20L2/RIOK2/NSA2/RRP36/RPS6/RPS28	26
GO:0051052	regulation of DNA metabolic process	0.010524	ESCO2/HNRNPC/STOML2/CACYBP/PRMT5/PARPBP/RAD51/CDK1/CCNA2/TIPIN/RAD51AP1/RFC5/CHEK1/MIS18A/E2F7/KDM1B/CDT1/DNA2/PDS5A/FBXO5/NBN/HSP90AA1/CDC7/USP1/ALYREF/DONSON/DHX9/UBE2N/TTF1/DNMT1/NAF1/CCT8/OTUD4/USP51/RGN/CCT2/ACVRL1/E2F8/FGFR1/WAPL/EYA3/WRAP53/GPER1/DNAJC2/EHMT2/PARP3/PPP2CA/ATG7/MAP2K4/MORC2/PTPRC/RAD50/DCP2	53
GO:0072655	establishment of protein localization to mitochondrion	0.010524	HSPA4/TIMM44/TOMM22/TIMM17A/HSP90AA1/PPP3R1/PMAIP1/TOMM5/DNAJA1/TIMM13/RNF31/CHCHD4/BCL2/TOMM34/LRRK2/COX18/E2F1/PDCD5/FZD5/RHOU/TIMM17B/UBE2J2	22
GO:0032984	protein-containing complex disassembly	0.010524	MRPL42/UBQLN1/MRPL15/KIF18A/SUPT16H/MRPS2/MRRF/MTIF2/EIF5A/MRPL44/MRPS22/MRPL50/MRPL4/MRPL32/MRPL3/MRPL16/MRPS30/KIF2A/FGF13/C12orf65/SMARCD3/MRPS16/MRPL11/MRPS26/TECPR1/PHF23/MRPS36/MRPL46/FYCO1/SWAP70/MRPL14/CHMP2B/DSTN/CARMIL1/KIF5B/CHMP7/JMJD4/MRPL54/FZD5/MRPL34/VPS16/DNAJC6	42
GO:0009167	purine ribonucleoside monophosphate metabolic process	0.010524	NUP37/PAICS/STOML2/CCNB1/NUP205/NDC1/NUP58/CDK1/NUP35/GART/AK2/PDE12/PPAT/NUP85/CYC1/GMPS/FXN/ENO1/SHMT2/COX15/GAPDH/FAM20C/NDUFA10/NUP50/ADK/COX5A/NUP107/SLC25A33/NUP54/NDUFAB1/ISCU/ENO3/RAE1/ADSL/UQCRQ/EIF6/FOXK2/DNAJC30/MLXIPL/NDUFS7/P2RX7/UQCR11/FOXK1/NCOR1	44
GO:0010824	regulation of centrosome duplication	0.010524	GEN1/PLK4/CHORDC1/STIL/POC1A/CEP295/KAT2B/CHMP2B/CEP120/NUBP1/ROCK2	11
GO:0034502	protein localization to chromosome	0.010524	ESCO2/KNL1/EZH2/RAD21/CDK1/BUB1B/BUB3/CDT1/NDC80/CCT8/CCT2/WAPL/MCM8/WRAP53/PARP3/CHMP7/LEMD2	17
GO:0061640	cytoskeleton-dependent cytokinesis	0.010524	NUSAP1/KIF20A/ANLN/CEP55/ECT2/KIF20B/INCENP/MAP9/RAB35/KLHDC8B/CHMP2B/TTC19/SNX18/CHMP7/BIN3/TRIM36/CUL7	17
GO:0009126	purine nucleoside monophosphate metabolic process	0.011029	NUP37/PAICS/STOML2/CCNB1/NUP205/NDC1/NUP58/CDK1/NUP35/GART/AK2/PDE12/PPAT/NUP85/CYC1/GMPS/FXN/ENO1/SHMT2/COX15/GAPDH/FAM20C/NDUFA10/NUP50/ADK/COX5A/NUP107/SLC25A33/NUP54/NDUFAB1/ISCU/ENO3/RAE1/ADSL/UQCRQ/EIF6/FOXK2/DNAJC30/MLXIPL/NDUFS7/P2RX7/UQCR11/FOXK1/NCOR1	44
GO:0007091	metaphase/anaphase transition of mitotic cell cycle	0.0112923	CCNB1/MAD2L1/RAD21/GEN1/BUB1B/CDC23/CENPE/CDT1/NDC80/DLGAP5/FBXO5/RIOK2	12
GO:0010965	regulation of mitotic sister chromatid separation	0.0112923	CCNB1/MAD2L1/RAD21/GEN1/BUB1B/CDC23/CENPE/CDT1/NDC80/DLGAP5/FBXO5/RIOK2	12
GO:0033260	nuclear DNA replication	0.0112923	PRIM2/POLE3/RAD51/FEN1/TIPIN/RFC5/CDT1/DNA2/POLE2/CDC7/SLBP/FGFR1	12
GO:0051304	chromosome separation	0.0114291	CCNB1/MAD2L1/RAD21/GEN1/BUB1B/CDC23/CENPE/CDT1/NDC80/DLGAP5/FBXO5/FANCM/NCAPH2/RIOK2/CSNK2A1	15
GO:0009127	purine nucleoside monophosphate biosynthetic process	0.0121219	NUP37/PAICS/STOML2/NUP205/NDC1/NUP58/NUP35/GART/AK2/PPAT/NUP85/GMPS/ENO1/GAPDH/NUP50/ADK/NUP107/NUP54/ENO3/RAE1/ADSL/EIF6/FOXK2/DNAJC30/MLXIPL/P2RX7/FOXK1/NCOR1	28
GO:0009168	purine ribonucleoside monophosphate biosynthetic process	0.0121219	NUP37/PAICS/STOML2/NUP205/NDC1/NUP58/NUP35/GART/AK2/PPAT/NUP85/GMPS/ENO1/GAPDH/NUP50/ADK/NUP107/NUP54/ENO3/RAE1/ADSL/EIF6/FOXK2/DNAJC30/MLXIPL/P2RX7/FOXK1/NCOR1	28
GO:0006406	mRNA export from nucleus	0.0121219	NUP37/NUP205/NDC1/NUP58/NCBP1/NUP35/CPSF2/NUP85/EIF5A/ALYREF/SLBP/SRSF6/SRSF1/FIP1L1/NUP50/NUP107/NUP54/NXT1/RAE1/CPSF4	20
GO:0071427	mRNA-containing ribonucleoprotein complex export from nucleus	0.0121219	NUP37/NUP205/NDC1/NUP58/NCBP1/NUP35/CPSF2/NUP85/EIF5A/ALYREF/SLBP/SRSF6/SRSF1/FIP1L1/NUP50/NUP107/NUP54/NXT1/RAE1/CPSF4	20
GO:0009161	ribonucleoside monophosphate metabolic process	0.0126695	NUP37/PAICS/STOML2/CCNB1/NUP205/NDC1/NUP58/CDK1/NUP35/GART/AK2/PDE12/PPAT/NUP85/CYC1/GMPS/FXN/ENO1/SHMT2/COX15/GAPDH/FAM20C/NDUFA10/NUP50/ADK/COX5A/NUP107/SLC25A33/NUP54/NDUFAB1/ISCU/ENO3/UCKL1/RAE1/ADSL/UQCRQ/EIF6/FOXK2/DNAJC30/MLXIPL/NDUFS7/P2RX7/UQCR11/FOXK1/NCOR1	45
GO:0006140	regulation of nucleotide metabolic process	0.0126695	NUP37/CCNB1/NUP205/NDC1/NUP58/CDK1/NUP35/PDE12/NUP85/ENO1/SHMT2/NUP50/NUP107/SLC25A33/NUP54/ISCU/RAE1/EIF6/PDP1/DNAJC30/MLXIPL/P2RX7/NCOR1	23
GO:0090329	regulation of DNA-dependent DNA replication	0.0128235	STOML2/TIPIN/RFC5/E2F7/CDT1/FBXO5/NBN/CDC7/DONSON/E2F8/FGFR1/ATG7	12
GO:0062012	regulation of small molecule metabolic process	0.0129942	NUP37/RAN/CCNB1/NUP205/NDC1/NUP58/CDK1/NUP35/PDE12/NUP85/PMAIP1/ENO1/SHMT2/PSMA2/PSMA4/PSMA3/DKK3/SORBS1/RGN/NUP50/PSMB7/KAT2B/PSMC1/NUP107/PSMD3/SLC25A33/NUP54/ISCU/GPER1/PSMD4/PRKCE/DHCR7/PSMA7/RAE1/SOGA1/PSMF1/TRIB3/SQLE/EIF6/NFYA/FOXA2/CLCN2/FOXK2/PDP1/DNAJC30/MLXIPL/GPAM/STARD4/PPP1R3B/P2RX7/NFYB/PSMB10/ABCD2/FOXK1/FAM3A/NCOR1	56
GO:1902850	microtubule cytoskeleton organization involved in mitosis	0.0130713	RAN/CCNB1/MAD2L1/NUSAP1/STIL/POC1A/CENPE/KIF11/NDC80/TPX2/BCCIP/SUN2/KIF2A/MAP9/CEP192/MYBL2/CHMP2B/RAE1/PARP3/NSFL1C/RAB11A	21
GO:0009150	purine ribonucleotide metabolic process	0.0135426	NUP37/PAICS/STOML2/RAN/CCNB1/NUP205/NDC1/NUP58/CDK1/NUP35/GART/AK2/MCCC2/PDE12/PPAT/NUP85/OXSM/CYC1/GMPS/FXN/ENO1/SHMT2/COX15/HINT1/GAPDH/TPST1/FAM20C/MOCOS/NDUFA10/NUP50/GIMAP7/ADK/COX5A/NUP107/SLC25A33/GNAI3/NUP54/NDUFAB1/ISCU/NFS1/ENO3/LRRK2/RAE1/ACSF2/ADSL/ITPA/HSD17B4/UQCRQ/EIF6/MOCS3/FOXK2/RAB23/PDP1/DNAJC30/MLXIPL/NDUFS7/P2RX7/PIPOX/ACSS1/UQCR11/FOXK1/NCOR1	62
GO:0070585	protein localization to mitochondrion	0.0141279	HSPA4/TIMM44/TOMM22/TIMM17A/HSP90AA1/PPP3R1/PMAIP1/TOMM5/DNAJA1/TIMM13/RNF31/CHCHD4/BCL2/TOMM34/LRRK2/COX18/E2F1/PDCD5/FZD5/RHOU/TIMM17B/UBE2J2	22
GO:0033045	regulation of sister chromatid segregation	0.014213	CCNB1/MAD2L1/RAD21/FEN1/GEN1/BUB1B/CDC23/CENPE/CDT1/NDC80/DLGAP5/FBXO5/SMC5/WAPL/RIOK2	15
GO:0000377	RNA splicing, via transesterification reactions with bulged adenosine as nucleophile	0.0145641	HNRNPC/SNRPF/PRMT5/TGS1/NCBP1/PRPF40A/C1QBP/CPSF2/GEMIN4/GEMIN5/GEMIN2/SYNCRIP/GCFC2/ALYREF/DHX9/SNRNP40/TRA2B/HNRNPL/TXNL4A/SNW1/PHF5A/HNRNPF/SNRPA/PPIH/SRSF6/SRSF1/FIP1L1/SNRPB/SMN2/DHX15/CELF2/HNRNPR/PNN/WDR77/CSTF1/DHX16/CPSF4/SNRPB2/FAM172A/CWC27/HNRNPA0/PSIP1/SREK1/CTNNBL1/METTL14/PPIL3	46
GO:0044784	metaphase/anaphase transition of cell cycle	0.0145641	CCNB1/MAD2L1/RAD21/GEN1/BUB1B/CDC23/CENPE/CDT1/NDC80/DLGAP5/FBXO5/RIOK2	12
GO:0051306	mitotic sister chromatid separation	0.0145641	CCNB1/MAD2L1/RAD21/GEN1/BUB1B/CDC23/CENPE/CDT1/NDC80/DLGAP5/FBXO5/RIOK2	12
GO:0043624	cellular protein complex disassembly	0.0146164	MRPL42/MRPL15/KIF18A/MRPS2/MRRF/EIF5A/MRPL44/MRPS22/MRPL50/MRPL4/MRPL32/MRPL3/MRPL16/MRPS30/KIF2A/FGF13/C12orf65/MRPS16/MRPL11/MRPS26/MRPS36/MRPL46/SWAP70/MRPL14/DSTN/CARMIL1/JMJD4/MRPL54/MRPL34/DNAJC6	30
GO:0002082	regulation of oxidative phosphorylation	0.0146164	CCNB1/CDK1/PDE12/SHMT2/SLC25A33/ISCU/DNAJC30/MLXIPL	8
GO:0010971	positive regulation of G2/M transition of mitotic cell cycle	0.0146164	CCNB1/DTL/CDK1/FBXO5/CDC7/SMARCD3/HSPA2/RAB11A	8
GO:0032392	DNA geometric change	0.0151236	MCM4/RAD51/BRIP1/SUPV3L1/GINS4/MCM6/DNA2/NBN/DHX9/HMGB2/FANCM/GINS2/ASCC3/SMARCA1/CHD1/DHX30/RAD50	17
GO:0000082	G1/S transition of mitotic cell cycle	0.0151236	MCM4/CCNB1/CCNE2/DHFR/PRIM2/POLE3/EZH2/CDK1/ORC1/E2F7/CDC25C/MCM6/CDT1/PPAT/FBXO5/POLE2/CDC7/TYMS/RRM2/CNOT10/AURKA/MCM5/E2F8/BCL2/ACVR1/MCM8/NASP/ZPR1/CNOT8/AIF1/CCNE1/CCNH/CNOT11/RPS6/E2F1/GPNMB/RHOU/RBL2	38
GO:0045930	negative regulation of mitotic cell cycle	0.0162548	CCNB1/MAD2L1/EZH2/RAD21/CDK1/TIPIN/GEN1/BUB1B/ZWILCH/DCLRE1B/CHEK1/E2F7/CDC25C/CDT1/NDC80/CLSPN/FBXO5/NBN/KNTC1/DONSON/ZWINT/CNOT10/PSMA2/PSMA4/PSMA3/AURKA/PSMB7/PSMC1/PSMD3/E2F8/MDC1/BCL2/PSMD4/CNOT8/PSMA7/PSMF1/CNOT11/RPS6/E2F1/GPNMB/PSMB10/RBL2	42
GO:0043467	regulation of generation of precursor metabolites and energy	0.0162548	NUP37/CCNB1/NUP205/NDC1/NUP58/CDK1/NUP35/PDE12/NUP85/SHMT2/SORBS1/NUP50/TRAP1/NUP107/SLC25A33/NUP54/ISCU/RAE1/EIF6/DNAJC30/MLXIPL/PPP1R3B/P2RX7/NCOR1	24
GO:1900034	regulation of cellular response to heat	0.0162548	NUP37/FKBP4/NUP205/NDC1/NUP58/NUP35/CHORDC1/NUP85/HSP90AA1/NUP50/HSPB8/NUP107/CD34/NUP54/DNAJC2/RAE1	16
GO:0009156	ribonucleoside monophosphate biosynthetic process	0.0162548	NUP37/PAICS/STOML2/NUP205/NDC1/NUP58/NUP35/GART/AK2/PPAT/NUP85/GMPS/ENO1/GAPDH/NUP50/ADK/NUP107/NUP54/ENO3/UCKL1/RAE1/ADSL/EIF6/FOXK2/DNAJC30/MLXIPL/P2RX7/FOXK1/NCOR1	29
GO:0000963	mitochondrial RNA processing	0.0162548	SUPV3L1/TRMT10C/TRNT1/FASTKD5/CDK5RAP1/HSD17B10	6
GO:0033047	regulation of mitotic sister chromatid segregation	0.0162548	CCNB1/MAD2L1/RAD21/GEN1/BUB1B/CDC23/CENPE/CDT1/NDC80/DLGAP5/FBXO5/SMC5/RIOK2	13
GO:0075733	intracellular transport of virus	0.0162548	NUP37/RAN/NUP205/NDC1/NUP58/NUP35/NUP85/NUP50/NUP107/NUP54/RAE1/VPS37A/BST2	13
GO:0007052	mitotic spindle organization	0.0166455	RAN/CCNB1/STIL/POC1A/CENPE/KIF11/NDC80/TPX2/BCCIP/SUN2/KIF2A/MAP9/CEP192/MYBL2/CHMP2B/RAE1/PARP3/RAB11A	18
GO:0006369	termination of RNA polymerase II transcription	0.018391	SNRPF/NCBP1/TTF2/CPSF2/SLBP/FIP1L1/SNRPB/CSTF1/CPSF4	9
GO:0030071	regulation of mitotic metaphase/anaphase transition	0.018522	CCNB1/MAD2L1/RAD21/GEN1/CDC23/CENPE/CDT1/NDC80/DLGAP5/FBXO5/RIOK2	11
GO:0032886	regulation of microtubule-based process	0.018522	FKBP4/SKA1/GEN1/PLK4/KIF18A/CHEK1/CHORDC1/STIL/POC1A/KIF11/TPX2/FEZ1/MAP9/AURKA/CEP295/FGF13/MAP2/KAT2B/CAMSAP1/CHMP2B/CYLD/RAE1/CEP120/NUBP1/PARP3/MKKS/TRIM36/NSFL1C/RASSF7/ROCK2	30
GO:0022618	ribonucleoprotein complex assembly	0.0198833	SNRPF/PRMT5/TGS1/NCBP1/C1QBP/MRPS2/GEMIN4/GEMIN5/GEMIN2/NOP2/HSP90AA1/GCFC2/DHX9/TXNL4A/SRSF6/NAF1/SRSF1/CIRBP/SNRPB/SMN2/NOCT/CELF2/NSUN4/NUFIP1/DHX30/FASTKD2/WDR77/GRB7/EIF6/EIF3B/PSIP1	31
GO:0000910	cytokinesis	0.0202404	PRPF40A/NUSAP1/E2F7/KIF20A/ANLN/CEP55/ECT2/KIF20B/INCENP/CSPP1/MAP9/RAB35/E2F8/KLHDC8B/CHMP2B/TTC19/PRKCE/SNX18/CDC25B/CHMP7/BIN3/TRIM36/CUL7/RAB11A	24
GO:1902750	negative regulation of cell cycle G2/M phase transition	0.0204777	DTL/RAD21/CDK1/CHEK1/CLSPN/NBN/DONSON/PSMA2/PSMA4/PSMA3/AURKA/PSMB7/PSMC1/PSMD3/PSMD4/PSMA7/PSMF1/PSMB10	18
GO:0051298	centrosome duplication	0.0214986	GEN1/PLK4/CHORDC1/STIL/POC1A/CEP152/CEP295/KAT2B/CEP192/CHMP2B/CEP120/NUBP1/ROCK2	13
GO:0034404	nucleobase-containing small molecule biosynthetic process	0.0225248	NUP37/NUP205/NDC1/NUP58/NUP35/UNG/NUP85/GMPS/ENO1/HINT1/DCTPP1/GAPDH/AMD1/TK1/NUP50/ADK/NUP107/NUP54/ENO3/UCKL1/RAE1/ITPA/EIF6/FOXK2/MLXIPL/CTPS2/P2RX7/SMUG1/FOXK1/TK2/NCOR1	31
GO:0090501	RNA phosphodiester bond hydrolysis	0.0242336	POP1/EXO1/FEN1/NCBP1/CPSF2/PDE12/MRPL44/NOP14/PPP1R8/NOB1/RNASEH2A/TSEN2/POLR3K/NOCT/MOV10/ISG20L2/RNASE6/CNOT8/TSEN54/RRP36/SND1/DCP2	22
GO:0031123	RNA 3'-end processing	0.0242462	CCNB1/NCBP1/SUPV3L1/CPSF2/GRSF1/ALYREF/TRMT10C/TRNT1/SNRPA/SLBP/SRSF6/SRSF1/FIP1L1/CCNT1/POLR3K/LEO1/CSTF1/CPSF4/HSD17B10	19
GO:0046794	transport of virus	0.0242462	NUP37/RAN/NUP205/NDC1/NUP58/NUP35/NUP85/NUP50/NUP107/NUP54/RAE1/VPS37A/BST2	13
GO:0031570	DNA integrity checkpoint	0.0244412	CCNB1/DTL/CDK1/TIPIN/BRIP1/CHEK1/E2F7/CDC25C/CDT1/CLSPN/DNA2/NBN/DONSON/CNOT10/AURKA/PTPN11/E2F8/MDC1/PEA15/CNOT8/CNOT11/E2F1/RBL2	23
GO:1905897	regulation of response to endoplasmic reticulum stress	0.0244412	UBQLN1/COPS5/PMAIP1/YOD1/TMEM33/BAK1/XBP1/SERINC3/FCGR2B/LRRK2/GRINA/UBAC2/UBE2G2/NCK2/UBE2J1/BAG6	16
GO:0044843	cell cycle G1/S phase transition	0.024448	MCM4/CCNB1/CCNE2/DHFR/PRIM2/POLE3/EZH2/CDK1/CCNA2/ORC1/E2F7/CDC25C/MCM6/CDT1/PPAT/FBXO5/POLE2/CDC7/TYMS/RRM2/CNOT10/AURKA/MCM5/E2F8/BCL2/ACVR1/MCM8/NASP/ZPR1/CNOT8/AIF1/CCNE1/CCNH/CNOT11/RPS6/E2F1/GPNMB/RHOU/RBL2	39
GO:1902099	regulation of metaphase/anaphase transition of cell cycle	0.0249361	CCNB1/MAD2L1/RAD21/GEN1/CDC23/CENPE/CDT1/NDC80/DLGAP5/FBXO5/RIOK2	11
GO:0006520	cellular amino acid metabolic process	0.0253271	MARS2/CARNMT1/GART/IARS/MCCC2/PSAT1/PPAT/YARS2/EEF1E1/GMPS/FARSA/IARS2/SCLY/SHMT2/PSMA2/EPRS/PSMA4/PSMA3/LARS2/EARS2/KARS/PSMB7/PSMC1/PSMD3/CARS/ERO1A/PPA1/AHCY/NFS1/SERINC3/PSMD4/PSMA7/PSMF1/PCYOX1/AARS2/WARS/IDO1/HNF4A/GAMT/GSS/CTPS2/HSD17B10/PSMB10/PIPOX/SLC7A6	45
GO:0032508	DNA duplex unwinding	0.0266351	MCM4/RAD51/BRIP1/SUPV3L1/GINS4/MCM6/DNA2/NBN/DHX9/FANCM/GINS2/ASCC3/CHD1/DHX30/RAD50	15
GO:0051170	import into nucleus	0.0266351	NOLC1/SNRPF/RAN/NUP58/PKIG/GEMIN4/GEMIN5/GEMIN2/ECT2/SNRPB/MDFIC/SMN2/AGT/NUP54/ZPR1/MMP12/TXNIP/LRRK2/JUP/MED1/RAB23	21
GO:0006626	protein targeting to mitochondrion	0.0270146	HSPA4/TIMM44/TOMM22/TIMM17A/HSP90AA1/TOMM5/TIMM13/RNF31/CHCHD4/TOMM34/LRRK2/PDCD5/FZD5/RHOU/TIMM17B/UBE2J2	16
GO:0072378	blood coagulation, fibrin clot formation	0.0275632	C1QBP/F12/FBLN1/SERPING1/GP1BA/F10/TFPI/FGA	8
GO:1902751	positive regulation of cell cycle G2/M phase transition	0.0275632	CCNB1/DTL/CDK1/FBXO5/CDC7/SMARCD3/HSPA2/RAB11A	8
GO:0033059	cellular pigmentation	0.0288575	CD63/ZEB2/MREG/BCL2/RAB27A/LYST/BBS7/MKKS/SHROOM2/ANKRD27/RAB11A	11
GO:0007100	mitotic centrosome separation	0.0298148	CHEK1/KIF11/MAP9/AURKA/NSFL1C	5
GO:0010972	negative regulation of G2/M transition of mitotic cell cycle	0.0298148	RAD21/CDK1/CLSPN/NBN/DONSON/PSMA2/PSMA4/PSMA3/AURKA/PSMB7/PSMC1/PSMD3/PSMD4/PSMA7/PSMF1/PSMB10	16
GO:0006997	nucleus organization	0.0298562	VRK1/NOLC1/CCNB1/NUP205/NDC1/CDK1/SUN2/HMGB2/REEP4/RRN3/NUP107/WRAP53/ZPR1/CHMP2B/GPER1/CHMP7/PPP2CA/LEMD2/LPIN1/NECTIN2	20
GO:1901991	negative regulation of mitotic cell cycle phase transition	0.0299086	CCNB1/MAD2L1/EZH2/RAD21/CDK1/GEN1/E2F7/CDC25C/CDT1/NDC80/CLSPN/FBXO5/NBN/DONSON/CNOT10/PSMA2/PSMA4/PSMA3/AURKA/PSMB7/PSMC1/PSMD3/E2F8/BCL2/PSMD4/CNOT8/PSMA7/PSMF1/CNOT11/E2F1/GPNMB/PSMB10/RBL2	33
GO:1901988	negative regulation of cell cycle phase transition	0.0299086	CCNB1/MAD2L1/EZH2/DTL/RAD21/CDK1/GEN1/CHEK1/E2F7/CDC25C/CDT1/NDC80/CLSPN/FBXO5/NBN/DONSON/CNOT10/PSMA2/PSMA4/PSMA3/AURKA/PSMB7/PSMC1/PSMD3/E2F8/BCL2/PSMD4/CNOT8/PSMA7/PSMF1/CNOT11/E2F1/GPNMB/PSMB10/RBL2	35
GO:0006450	regulation of translational fidelity	0.0299086	IARS/IARS2/LARS2/DTD2/CDK5RAP1/AARS2	6
GO:0006096	glycolytic process	0.0305964	NUP37/NUP205/NDC1/NUP58/NUP35/NUP85/ENO1/GAPDH/NUP50/NUP107/NUP54/ENO3/RAE1/EIF6/FOXK2/MLXIPL/P2RX7/FOXK1/NCOR1	19
GO:0051310	metaphase plate congression	0.0319681	CCNB1/CDC23/KIF18A/CENPE/CDT1/KIF22/NDC80/GEM/CHMP2B/CHMP7/RAB11A/TTL	12
GO:0044773	mitotic DNA damage checkpoint	0.0326382	CCNB1/CDK1/TIPIN/E2F7/CDC25C/CLSPN/NBN/DONSON/CNOT10/AURKA/E2F8/MDC1/CNOT8/CNOT11/E2F1/RBL2	16
GO:0000723	telomere maintenance	0.0326382	HNRNPC/CCNE2/PRIM2/POLE3/GAR1/RAD51/EXO1/FEN1/DCLRE1B/RFC5/DNA2/POLE2/NBN/HSP90AA1/NHP2/SMC5/NAF1/CCT8/CCT2/WRAP53/CCNE1/PARP3/RAD50/DCP2	24
GO:0007080	mitotic metaphase plate congression	0.032663	CCNB1/CDC23/KIF18A/CENPE/CDT1/KIF22/NDC80/CHMP2B/CHMP7/RAB11A	10
GO:0006757	ATP generation from ADP	0.0332997	NUP37/NUP205/NDC1/NUP58/NUP35/NUP85/ENO1/GAPDH/NUP50/NUP107/NUP54/ENO3/RAE1/EIF6/FOXK2/MLXIPL/P2RX7/FOXK1/NCOR1	19
GO:0046034	ATP metabolic process	0.0377122	NUP37/STOML2/CCNB1/NUP205/NDC1/NUP58/CDK1/NUP35/AK2/PDE12/NUP85/CYC1/FXN/ENO1/SHMT2/COX15/GAPDH/FAM20C/NDUFA10/NUP50/COX5A/NUP107/SLC25A33/NUP54/NDUFAB1/ISCU/ENO3/RAE1/UQCRQ/EIF6/FOXK2/DNAJC30/MLXIPL/NDUFS7/P2RX7/UQCR11/FOXK1/NCOR1	38
GO:0046031	ADP metabolic process	0.0382655	NUP37/NUP205/NDC1/NUP58/NUP35/AK2/NUP85/ENO1/GAPDH/NUP50/NUP107/NUP54/ENO3/RAE1/EIF6/FOXK2/MLXIPL/P2RX7/FOXK1/NCOR1	20
GO:0070131	positive regulation of mitochondrial translation	0.040648	C1QBP/RMND1/TRMT10C/NSUN4/FASTKD2/CDK5RAP1	6
GO:0009142	nucleoside triphosphate biosynthetic process	0.0407185	NUP37/STOML2/NUP205/NDC1/NUP58/NUP35/NUP85/TYMS/ENO1/GAPDH/NUP50/ADK/NUP107/NUP54/ENO3/UCKL1/RAE1/EIF6/FOXK2/DNAJC30/MLXIPL/CTPS2/P2RX7/CMPK2/FOXK1/NCOR1	26
GO:0046039	GTP metabolic process	0.041406	RAN/MOCOS/GIMAP7/GNAI3/NFS1/LRRK2/MOCS3/RAB23	8
GO:0051299	centrosome separation	0.0432525	CHEK1/KIF11/MAP9/AURKA/NSFL1C	5
GO:0042866	pyruvate biosynthetic process	0.043961	NUP37/NUP205/NDC1/NUP58/NUP35/NUP85/ENO1/GAPDH/NUP50/NUP107/NUP54/ENO3/RAE1/EIF6/FOXK2/MLXIPL/P2RX7/FOXK1/NCOR1	19
GO:0036297	interstrand cross-link repair	0.0440849	FANCD2/RAD51/DCLRE1B/RAD51AP1/USP1/FANCM/DCLRE1A/FANCA/MCM8/ERCC6L2/FAAP20	11
GO:0022411	cellular component disassembly	0.0444078	VRK1/MRPL42/CCNB1/CDK1/UBQLN1/CAPN10/MRPL15/KIF18A/SUPT16H/MRPS2/MRRF/MTIF2/EIF5A/MRPL44/MRPS22/MRPL50/MRPL4/MRPL32/HMGB2/MRPL3/MRPL16/MRPS30/KIF2A/FGF13/C12orf65/SMARCD3/MRPS16/MRPL11/MRPS26/TECPR1/HSPA2/PHF23/MRPS36/MRPL46/FYCO1/SWAP70/MRPL14/CHMP2B/GPER1/MMP12/DSTN/CTSV/CARMIL1/KIF5B/CHMP7/JMJD4/MRPL54/MELTF/ATG7/VPS13C/SHARPIN/C1QA/LPIN1/FZD5/MRPL34/VPS16/DNAJC6/FLOT1	58
GO:0044766	multi-organism transport	0.0444078	NUP37/RAN/NUP205/NDC1/NUP58/NUP35/NUP85/ALYREF/NUP50/NUP107/NUP54/RAE1/VPS37A/BST2	14
GO:1902579	multi-organism localization	0.0444078	NUP37/RAN/NUP205/NDC1/NUP58/NUP35/NUP85/ALYREF/NUP50/NUP107/NUP54/RAE1/VPS37A/BST2	14
GO:0044774	mitotic DNA integrity checkpoint	0.0484407	CCNB1/CDK1/TIPIN/E2F7/CDC25C/CLSPN/NBN/DONSON/CNOT10/AURKA/E2F8/MDC1/CNOT8/CNOT11/E2F1/RBL2	16
GO:0051225	spindle assembly	0.0484407	HAUS6/KIF11/HAUS2/HAUS8/TPX2/FBXO5/BCCIP/HAUS3/KIF2A/MAP9/AURKA/CEP192/MYBL2/CHMP2B/RAB11A/NCOR1	16
GO:2001169	regulation of ATP biosynthetic process	0.0484407	NUP37/NUP205/NDC1/NUP58/NUP35/NUP85/ENO1/NUP50/NUP107/NUP54/RAE1/EIF6/DNAJC30/MLXIPL/P2RX7/NCOR1	16
GO:0016569	covalent chromatin modification	0.0491637	VRK1/CCNB1/PRMT5/POLE3/EZH2/CDK1/CCNA2/CHEK1/KDM1B/NAA50/TAF5/HIST1H1E/HELLS/NTMT1/PHB/UHRF1/TAF5L/UBE2N/PAXBP1/SNW1/HAT1/MYB/AURKA/DNMT1/SUDS3/USP51/KAT2B/YEATS4/PWP1/CHD1/HLCS/EYA3/LEO1/BAZ1A/JADE3/LRRK2/EHMT2/SMYD1/PCGF5/HDAC5/TET3/BRPF3/MIER1/DNMT3B/JAK2/PAX5/VEGFA/MORC2/TET2/KMT5B/KAT6B/ING3	52
GO:0000077	DNA damage checkpoint	0.0492104	CCNB1/DTL/CDK1/TIPIN/BRIP1/CHEK1/E2F7/CDC25C/CLSPN/NBN/DONSON/CNOT10/AURKA/PTPN11/E2F8/MDC1/PEA15/CNOT8/CNOT11/E2F1/RBL2	21

## Sheet: S9
Table-S8: Spearman correlation between m6Ascore and other known signatures within the gastric cancer
From	To	P value	Cor
Antigen.processing.and.presentation	Angiogenesis	0.0166833	0.138186
Antigen.processing.machinery	Angiogenesis	0.185471	-0.0766355
CD8.T.effector	Angiogenesis	0.00171613	0.180536
EMT1	Angiogenesis	1.34756e-12	0.396332
Immune.checkpoint	Angiogenesis	0.000444079	0.201918
WNT.target	Angiogenesis	0.0231418	-0.13116
Mismatch.repair	Antigen processing and presentation	0.000220169	0.212217
Nucleotide.excision.repair	Antigen processing and presentation	7.78864e-06	0.255757
Pan.F.TBRS	Antigen processing and presentation	0.380622	-0.0507761
WNT.target	Antigen processing and presentation	0.0221219	0.132145
Cell.cycle	Antigen processing machinery	2.95769e-09	0.336086
DNA.damage.repair	Antigen processing machinery	4.00431e-08	0.312026
DNA.replication	Antigen processing machinery	1.08355e-09	0.344839
EMT1	Antigen processing machinery	0.860847	0.010157
EMT2	Antigen processing machinery	0.036324	-0.120951
EMT3	Antigen processing machinery	0.0264978	-0.128161
Mismatch.repair	Antigen processing machinery	7.96717e-06	0.255486
Nucleotide.excision.repair	Antigen processing machinery	1.53262e-09	0.341847
Pan.F.TBRS	Antigen processing machinery	4.4189e-05	-0.234146
WNT.target	Antigen processing machinery	0.00051938	0.19955
Antigen.processing.and.presentation	Base excision repair	0.0208147	0.133468
Antigen.processing.machinery	Base excision repair	7.56637e-08	0.305823
CD8.T.effector	Base excision repair	0.76664	-0.0171949
ECM.receptor.interaction	Base excision repair	1.35097e-12	-0.396315
EMT1	Base excision repair	6.35071e-06	-0.258177
Immune.checkpoint	Base excision repair	0.463674	0.0424462
JAK.STAT.signaling.pathway	Base excision repair	0.000161425	-0.216623
NF.kappa.B.signaling.pathway	Base excision repair	6.77356e-08	-0.306912
Wnt.signaling.pathway	Base excision repair	2.38971e-06	-0.269458
WNT.target	Base excision repair	0.000187085	0.21454
Cell.cycle	CD8 T effector	0.0466629	0.114977
DNA.damage.repair	CD8 T effector	0.509419	0.0382164
DNA.replication	CD8 T effector	0.13119	0.0873325
EMT1	CD8 T effector	0.386281	0.0501761
EMT2	CD8 T effector	0.00150508	0.182712
EMT3	CD8 T effector	0.00237019	0.175076
Mismatch.repair	CD8 T effector	0.280435	0.0624931
Nucleotide.excision.repair	CD8 T effector	0.0644487	0.106906
Pan.F.TBRS	CD8 T effector	0.821743	0.0130544
WNT.target	CD8 T effector	0.459557	0.0428378
Antigen.processing.and.presentation	Cell cycle	1.01009e-05	0.252639
EMT1	Cell cycle	0.00208555	-0.177258
EMT2	Cell cycle	7.34197e-14	-0.413517
Immune.checkpoint	Cell cycle	0.00806018	0.152834
WNT.target	Cell cycle	1.47312e-06	0.274863
Antigen.processing.and.presentation	DNA damage repair	0.000982336	0.189631
EMT1	DNA damage repair	6.76687e-06	-0.257427
Immune.checkpoint	DNA damage repair	0.189723	0.0759022
WNT.target	DNA damage repair	8.56557e-08	0.304598
Antigen.processing.and.presentation	DNA replication	0.000102411	0.222931
EMT1	DNA replication	7.00925e-05	-0.228058
EMT2	DNA replication	2.54488e-15	-0.423701
Immune.checkpoint	DNA replication	0.0143222	0.141363
WNT.target	DNA replication	8.84218e-06	0.25424
Antigen.processing.and.presentation	ECM-receptor interaction	5.22868e-05	0.231943
Antigen.processing.machinery	ECM-receptor interaction	0.438885	0.0448347
CD8.T.effector	ECM-receptor interaction	0.000181937	0.214935
Cell.cycle	ECM-receptor interaction	1.19382e-14	-0.420678
DNA.damage.repair	ECM-receptor interaction	3.68216e-14	-0.416668
DNA.replication	ECM-receptor interaction	1.55919e-12	-0.395353
Immune.checkpoint	ECM-receptor interaction	1.59196e-07	0.298392
Mismatch.repair	ECM-receptor interaction	1.9126e-11	-0.377396
Nucleotide.excision.repair	ECM-receptor interaction	2.66509e-10	-0.356621
WNT.target	ECM-receptor interaction	0.262629	0.0648549
Antigen.processing.and.presentation	EMT1	0.0523169	0.112168
Immune.checkpoint	EMT1	0.0305486	0.12495
Mismatch.repair	EMT1	0.000698667	-0.194993
Nucleotide.excision.repair	EMT1	0.000363837	-0.204893
WNT.target	EMT1	0.413735	0.0473383
Antigen.processing.and.presentation	EMT2	0.0100353	0.148549
Immune.checkpoint	EMT2	6.68854e-05	0.228683
Mismatch.repair	EMT2	3.66852e-11	-0.372426
Nucleotide.excision.repair	EMT2	4.22287e-11	-0.371338
WNT.target	EMT2	0.590888	-0.0311412
Antigen.processing.and.presentation	EMT3	0.0408365	0.118187
Immune.checkpoint	EMT3	0.000867864	0.191596
WNT.target	EMT3	0.11975	-0.090009
Mismatch.repair	Immune checkpoint	0.0399165	0.118729
Nucleotide.excision.repair	Immune checkpoint	0.00637627	0.157305
Pan.F.TBRS	Immune checkpoint	0.592563	0.0310008
WNT.target	Immune checkpoint	0.0649217	0.106718
Cell.cycle	JAK-STAT signaling pathway	0.0805589	-0.101054
DNA.damage.repair	JAK-STAT signaling pathway	0.0011828	-0.186648
DNA.replication	JAK-STAT signaling pathway	0.0182147	-0.136329
EMT1	JAK-STAT signaling pathway	2.22149e-12	0.392945
MAPK.signaling.pathway	JAK-STAT signaling pathway	7.57413e-14	0.413364
Mismatch.repair	JAK-STAT signaling pathway	0.0170009	-0.137789
Nucleotide.excision.repair	JAK-STAT signaling pathway	0.0365551	-0.120803
Pan.F.TBRS	JAK-STAT signaling pathway	1.17079e-08	0.323637
TGF.beta.signaling.pathway	JAK-STAT signaling pathway	5.72824e-08	0.308553
Wnt.signaling.pathway	JAK-STAT signaling pathway	3.99371e-09	0.333415
WNT.target	JAK-STAT signaling pathway	0.0239103	0.130441
Antigen.processing.and.presentation	m6Ascore	3.46119e-09	-0.334691
Base.excision.repair	m6Ascore	0	-0.782087
CD8.T.effector	m6Ascore	0.00129145	-0.185222
EMT1	m6Ascore	0.000457591	0.201467
Immune.checkpoint	m6Ascore	0.000168268	-0.216039
JAK.STAT.signaling.pathway	m6Ascore	0.311443	0.0586109
NF.kappa.B.signaling.pathway	m6Ascore	0.004618	0.163285
Wnt.signaling.pathway	m6Ascore	4.42782e-07	0.287831
WNT.target	m6Ascore	6.7026e-05	-0.228655
Antigen.processing.and.presentation	MAPK signaling pathway	0.0442221	-0.116278
Antigen.processing.machinery	MAPK signaling pathway	8.78565e-06	-0.254317
CD8.T.effector	MAPK signaling pathway	0.631331	-0.0277999
EMT1	MAPK signaling pathway	6.92739e-14	0.4138
Immune.checkpoint	MAPK signaling pathway	0.787823	0.015594
NF.kappa.B.signaling.pathway	MAPK signaling pathway	5.31087e-13	0.402358
Wnt.signaling.pathway	MAPK signaling pathway	4.71296e-13	0.403101
WNT.target	MAPK signaling pathway	0.691376	0.0230003
WNT.target	Mismatch repair	0.000341122	0.205847
Antigen.processing.machinery	NF-kappa B signaling pathway	3.47661e-15	0.423299
Cell.cycle	NF-kappa B signaling pathway	0.00014499	-0.218128
DNA.damage.repair	NF-kappa B signaling pathway	1.93885e-07	-0.296389
DNA.replication	NF-kappa B signaling pathway	0.000180436	-0.215053
EMT1	NF-kappa B signaling pathway	2.57929e-11	0.375128
Mismatch.repair	NF-kappa B signaling pathway	0.000173173	-0.215634
Nucleotide.excision.repair	NF-kappa B signaling pathway	0.000356032	-0.205215
Pan.F.TBRS	NF-kappa B signaling pathway	6.57938e-10	0.349088
TGF.beta.signaling.pathway	NF-kappa B signaling pathway	1.97264e-09	0.33965
Wnt.signaling.pathway	NF-kappa B signaling pathway	4.23985e-11	0.371307
WNT.target	NF-kappa B signaling pathway	0.939416	0.00440405
WNT.target	Nucleotide excision repair	6.06044e-06	0.258729
WNT.target	Pan-F-TBRS	0.202677	-0.0737399
Antigen.processing.and.presentation	PI3K-Akt signaling pathway	2.61319e-11	0.375029
Antigen.processing.machinery	PI3K-Akt signaling pathway	0.0163047	0.138667
CD8.T.effector	PI3K-Akt signaling pathway	8.37931e-13	0.399456
Cell.cycle	PI3K-Akt signaling pathway	1.43251e-13	-0.410055
DNA.replication	PI3K-Akt signaling pathway	2.19388e-13	-0.407669
Mismatch.repair	PI3K-Akt signaling pathway	1.74496e-11	-0.378086
Nucleotide.excision.repair	PI3K-Akt signaling pathway	1.96693e-14	-0.419088
Wnt.signaling.pathway	PI3K-Akt signaling pathway	4.44174e-14	0.415859
WNT.target	PI3K-Akt signaling pathway	0.366329	0.0523161
Antigen.processing.and.presentation	TGF-beta signaling pathway	0.716141	-0.0210673
Antigen.processing.machinery	TGF-beta signaling pathway	0.000456606	-0.201499
CD8.T.effector	TGF-beta signaling pathway	0.0904573	0.0979166
Cell.cycle	TGF-beta signaling pathway	1.42265e-12	-0.395969
EMT1	TGF-beta signaling pathway	1.29478e-14	0.42044
Immune.checkpoint	TGF-beta signaling pathway	0.272315	0.0635572
Mismatch.repair	TGF-beta signaling pathway	7.05048e-13	-0.400567
WNT.target	TGF-beta signaling pathway	0.84929	-0.0110103
Angiogenesis	Wnt signaling pathway	1.00936e-12	0.398244
Antigen.processing.and.presentation	Wnt signaling pathway	0.00175775	0.180136
Antigen.processing.machinery	Wnt signaling pathway	0.470233	0.0418262
CD8.T.effector	Wnt signaling pathway	0.00169824	0.18071
Cell.cycle	Wnt signaling pathway	0.0269988	-0.127742
DNA.damage.repair	Wnt signaling pathway	2.70409e-05	-0.240459
DNA.replication	Wnt signaling pathway	0.000189437	-0.214362
Immune.checkpoint	Wnt signaling pathway	0.000577247	0.197938
Mismatch.repair	Wnt signaling pathway	0.0013994	-0.18391
Nucleotide.excision.repair	Wnt signaling pathway	0.00220231	-0.176332
WNT.target	Wnt signaling pathway	0.0657004	0.106411
